# Supplementary material
Source: publisher figshare collection journal article supplement (https://gsapubs.figshare.com/ndownloader/files/27401624)
Supplement: Supplementary file 1 [file 27401624]

## Sheet: Table S1
Table S1. Major and trace element compositions of the subduction and collision-related magmatic rocks in the Gangdese belt, southern Tibet
Sample no	longitud	latitude	rock type	age	SiO2	TiO2	Al2O3	ΣFe2O3*	MnO	MgO	CaO	Na2O	K2O	P2O5	LOI	Total	Mg#	Na2O+K2O	A/CNK	Rb	Ba	Th	U	Nb	Ta	La	Ce	Pb	Pr	Sr	Nd	Sm	Zr	Hf	Eu	Gd	Tb	Dy	Y	Ho	Er	Tm	Yb	Lu	Sr/Y	La/Yb	[La/Yb]N	[Dy/Yb]N	Eu*
				(Ma)	(wt.%)	(wt.%)	(wt.%)	(wt.%)	(wt.%)	(wt.%)	(wt.%)	(wt.%)	(wt.%)	(wt.%)	(wt.%)	(wt.%)		(wt.%)		(ppm)	(ppm)	(ppm)	(ppm)	(ppm)	(ppm)	(ppm)	(ppm)	(ppm)	(ppm)	(ppm)	(ppm)	(ppm)	(ppm)	(ppm)	(ppm)	(ppm)	(ppm)	(ppm)	(ppm)	(ppm)	(ppm)	(ppm)	(ppm)	(ppm)
Jurassic
T09-14-2	92.15	29.33	Granodiorite	190.4	65	0.58	15.7	5.60111	0.11	2.22	4.11	3.25	2.43	0.1	1.72	105.986	44.0334	5.68	1.01489	93.3	302	9.15	1.54	5.26	0.53	15.4	31.6	35.1	3.93	316	15.5	3.89	146	4.41	0.8	4.18	0.76	5.06	28.8	1.13	3.49	0.53	3.62	0.56	10.9722	4.25414	3.0515	0.935529	0.606528
T09-15-1	92.15	29.33	Granodiorite	180	65	0.56	15.4	5.42889	0.11	2.52	4.25	3.21	2.14	0.1	2.04	105.774	47.9555	5.35	1.00364	87.8	269	8.9	1.8	4.59	0.48	16.4	33.7	17.9	4.11	327	16	3.5	131	4.11	0.73	3.74	0.61	3.85	20.3	0.84	2.48	0.37	2.52	0.39	16.1084	6.50794	4.66814	1.02253	0.616846
T09-16-1	92.6	29.3	Monzogranite	195.3	59.2	0.66	17.2	5.61556	0.1	4.13	5.73	4.48	1.87	0.2	1.11	105.521	59.3484	6.35	0.867099	44.1	348	1.47	0.29	2.86	0.19	9.74	20.3	3.49	2.78	525	12.1	2.77	94.1	2.52	0.8	2.75	0.41	2.34	11.9	0.49	1.43	0.2	1.3	0.18	44.1176	7.49231	5.37423	1.20472	0.88615
T09-16-2	92.6	29.3	Granodiorite	196.5	63.3	0.53	16.6	5.05556	0.09	2.77	5.69	4.1	1.24	0.16	1.34	105.556	52.099	5.34	0.899504	28	294	2.31	0.65	2.5	0.19	9.58	19.9	3.53	2.61	469	10.5	2.34	90	2.28	0.71	2.45	0.33	2	10.4	0.39	1.21	0.17	1.09	0.18	45.0962	8.78899	6.30434	1.22806	0.906548
T09-16-3	92.6	29.3	Gabbrodiorite	202.1	53.5	0.73	9.91	9.36	0.24	12.5	9.27	1.93	0.95	0.1	2.94	110.279	72.6102	2.88	0.469876	25.1	79.6	1.59	0.38	2.78	0.21	9.12	27.1	1.94	4.33	170	19.9	4.58	96.8	3.1	1.3	4.56	0.67	4.03	20.7	0.86	2.53	0.38	2.58	0.4	8.21256	3.53488	2.53557	1.04544	0.869665
XN-8	89.6308	29.4963	Tonalite	170	62.65	0.51	16.52	5.66	0.12	2.29	4.79	3.6	1.34	0.11	1.46	99.04	44.5413	4.94	1.02601	299	20.8	1.21	1.21	0.19	6.05	35.5	3.86	5.79	14.9	20.3	3.13	0.98	5.38	0.47	2.97	0.6	3.45	0.72	9.51	2.14	0.357	2.35	0.37	0.59	2.1346	95.9459	68.822	1.3024	11.8411
XN-20	90.1912	29.356	Granodiorite	180	73.59	0.26	13.27	1.98	0.071	0.67	2.51	3.83	2.84	0.08	0.7	99.08	40.1811	6.67	0.950951	330.4	8.98	0.46	0.46	0.18	8.8	15.74	1.74	2.86	6.3	6.12	1.22	0.58	2.48	0.26	1.12	0.16	0.98	0.2	59.14	0.62	0.1	0.7	0.12	1.42	0.103483	131.167	94.0858	1.11549	11.24
XRX-1	88.759	29.3653	Tonalite	182	61.35	0.68	16.55	6.46	0.13	2.59	5.75	3.55	1.44	0.14	1.8	100.44	44.3166	4.99	0.925818	345.8	12.44	0.7	0.7	0.36	4.86	25.56	3.2	2.48	13	18.42	3.04	0.96	6.46	0.54	3.2	0.5	3.14	0.66	108.54	1.96	0.3	1.96	0.3	2.58	0.169707	85.2	61.1139	1.47244	14.1206
XRX-2	88.76	29.3653	Tonalite	181	70.88	0.38	13.53	3.48	0.1	1.23	4.19	3.92	1.74	0.09	0.39	99.93	41.2323	5.66	0.847272	262	12.3	1.66	1.66	0.19	8.19	23.6	2.65	5.94	10.2	14.5	2.17	0.83	5.46	0.54	2.22	0.43	2.45	0.51	11.7	1.54	0.26	1.8	0.31	0.69	1.23932	76.129	54.6073	1.10109	11.3607
XRX-3	88.6875	29.366	Granodiorite	178	75.04	0.16	13.31	1.04	0.023	0.31	2.14	4.1	2.64	0.04	1.07	99.88	37.1741	6.74	0.985364	141	7.96	0.8	0.8	0.67	6.9	13.5	1.2	3.64	4.01	4.12	0.63	0.22	3.26	0.33	0.57	0.1	0.51	0.12	134	0.43	0.07	0.52	0.09	3.42	0.0307463	150	107.595	0.892388	11.7486
XRX-4	88.6873	29.3657	Tonalite	184	67.47	0.33	15.89	3.83	0.04	1.36	3.95	3.41	2.47	0.09	0.96	99.81	41.3448	5.88	1.02616	180	7.9	1.02	1.02	0.54	6.3	14.8	1.73	1.62	6.73	8.82	1.31	0.4	4.65	0.49	1.22	0.24	1.46	0.3	111	0.94	0.15	1.05	0.18	0.18	0.0794595	82.2222	58.978	1.11549	12.0378
XRX-5	88.6365	29.3657	Tonalite	180	65.16	0.53	16.25	4.66	0.11	1.71	5.08	4.22	1	0.12	1.14	99.96	42.1438	5.22	0.940364	395.96	16.33	0.91	0.91	2.98	3.45	31.12	3.61	3.18	13.9	17.91	2.98	0.97	9.41	0.71	3.02	0.47	2.98	0.63	119.11	1.91	0.28	1.95	0.3	2.8	0.150365	103.733	74.4079	1.40551	13.674
XRX-37	88.7242	29.3647	Granodiorite	170	64.23	0.5	15.38	5.37	0.14	1.98	6.06	3.66	1.78	0.17	0.57	99.84	42.2607	5.44	0.809873	369	14.8	1.12	1.12	0.27	6.29	26.1	3.09	3.9	12.4	16.8	2.56	0.88	4.94	0.4	2.46	0.49	2.81	0.59	11.2	1.75	0.302	2.06	0.33	0.77	1.5	79.0909	56.7319	1.19661	11.453
XRX-38	88.7295	29.3637	Granodiorite	168	64.83	0.47	14.9	5.39	0.14	1.9	5.59	3.55	2.09	0.15	0.78	99.79	41.1676	5.64	0.814654	365	16.4	1.39	1.39	0.51	5.34	30.1	3.39	5.11	13.6	17.7	2.71	0.89	5.93	0.47	2.67	0.52	2.88	0.59	27.3	1.93	0.31	2.03	0.33	1.06	0.648352	91.2121	65.4264	1.19661	11.9988
XRX-40	88.8445	29.3697	granodiorite	172	64.02	0.67	14.35	6.48	0.14	2.41	5.43	3.26	1.72	0.16	1.04	99.68	42.4716	4.98	0.838203	429	5.34	0.74	0.74	0.26	11.9	13.22	1.98	1.88	9.08	18.7	2.5	0.8	3.72	0.36	2.82	0.46	3.02	0.66	16.04	2	0.3	2.06	0.34	0.58	1.16584	38.8824	27.8903	1.29921	14.2118
1513-58	91.6	29.59	Granitic porphyry	182.3	79.9	0.17	11.4	1.21111	0.03	0.15	0.41	3.73	3.33	0.04	0.74	102.22	19.7339	7.06	1.08606	62.9	1043	6.04	1.68	4.41	0.51	13.6	25.1	37	2.58	155	8.73	1.55	89.1	2.47	0.15	1.76	0.21	1.36	6.99	0.28	0.82	0.15	1.05	0.17	22.1745	12.9524	9.29074	0.866892	0.277647
3911-90	91.6	29.59	Granitic porphyry	182.3	76.5	0.19	12.3	1.16667	0.07	0.24	0.58	2.8	5.77	0.04	0.77	101.497	28.9952	8.57	1.03154	116	2325	9.68	1.87	7.1	0.75	29.6	51.3	12.8	5.03	125	16.3	2.7	114	3.31	0.4	3.47	0.38	2.36	12.6	0.49	1.41	0.25	1.84	0.3	9.92063	16.087	11.5392	0.858439	0.399519
QL01-58	91.6	29.59	Granitic porphyry	182.3	81.4	0.19	10	0.911111	0.04	0.13	0.09	1.29	6.28	0.03	0.52	101.716	22.0719	7.57	1.09882	111	2060	5.33	1.23	6.92	0.71	14.3	26.2	41.8	3.01	198	9.86	1.69	90.9	2.63	0.05	1.95	0.2	1.33	6.39	0.27	0.81	0.14	1.07	0.19	30.9859	13.3645	9.58634	0.831923	0.0842041
YB12-1-1	91.38	29.24	Dacite	171.9	65.96	0.49	15.81	4.34	0.1	1.28	2.78	4.28	2.79	0.11	2	103.931	36.9266	7.07	1.04478	77.58	800.95	6.22	2.01	6.56	0.44	22.84	43.18	27.03	4.75	361.08	17.14	4.22	183.29	4.65	1.14	3.37	0.53	3.5	20.75	0.72	2.24	0.36	2.51	0.4	17.4014	9.0996	6.52714	0.933275	0.924182
YB12-4-1	91.38	29.24	Dacite	171.9	70.42	0.39	14.95	3.14	0.07	0.78	1.83	3.59	2.62	0.09	1.51	102.274	33.0254	6.21	1.23734	91.01	878.49	6.93	2.1	6.93	0.45	21.38	39.73	9.37	4.56	315.96	16.5	3.62	184.33	4.22	1.11	3.18	0.53	3.29	19.69	0.7	2.16	0.37	2.56	0.41	16.0467	8.35156	5.99057	0.860144	1.00018
YB12-4-3	91.38	29.24	Dacite	171.9	70.85	0.4	14.64	3.12	0.08	0.67	1.79	3.68	2.74	0.09	1.8	102.723	29.8875	6.42	1.19143	77.61	820.06	6.7	1.99	6.86	0.46	20.34	37.78	17.69	4.27	280.83	15.08	3.41	99.21	2.49	1.06	3.06	0.51	3.15	18.36	0.66	2.01	0.34	2.24	0.34	15.2958	9.08036	6.51334	0.941191	1.00321
YB12-4-7	91.38	29.24	Dacite	171.9	69.44	0.4	14.72	3.19	0.12	1.13	2.27	3.58	2.99	0.09	1.93	102.798	41.286	6.57	1.10937	90.53	852.07	6.62	2.11	6.77	0.48	23.94	44.24	11.45	4.8	257.49	17.04	4.01	125.42	3.36	1.07	3.22	0.5	3.03	19.67	0.69	2.12	0.34	2.35	0.36	13.0905	10.1872	7.3073	0.862959	0.910348
YB12-4-8	91.38	29.24	Dacite	171.9	67.65	0.39	14.61	3.24	0.08	0.79	2.37	3.84	3.06	0.09	3.75	102.845	32.6151	6.9	1.04696	84.18	847.14	6.97	2.14	7.16	0.47	21.84	40.06	21.08	4.59	353.92	16.26	3.74	162.99	3.88	1.16	3.32	0.55	3.4	20.53	0.72	2.19	0.37	2.57	0.41	17.2392	8.49805	6.09565	0.885444	1.00641
10SR-08	92.02	29.2	Dacite	195	67.04	0.52	18.18	3.64	0.15	1.27	3.45	2.47	1.32	0.13	1.75	99.91	40.9189	3.79	1.54332	21	224	4.15	1.16	4.33	0.35	20.9	44.7	14.6	5.69	296	22.1	4.27	121	3.45	1.08	4.17	0.71	4.61	26.3	0.99	2.84	0.45	2.93	0.47	11.2548	7.13311	5.11657	1.05305	0.782466
10SR-13	92.02	29.2	Andesite	195	60.74	0.86	20.68	5.9	0.08	1.33	2.53	4.25	1.36	0.1	2.07	99.9	30.9144	5.61	1.58154	27	220	2.14	0.61	3.66	0.24	12.2	26.1	12.2	3.46	342	13.9	3.13	98	2.54	1.09	2.88	0.47	2.87	16	0.58	1.63	0.25	1.62	0.27	21.375	7.53086	5.40189	1.18572	1.10989
10SR-24	92.02	29.2	Basalt	195	51.84	0.92	19.7	10.04	0.24	4.48	5.36	4.99	0.41	0.16	1.69	99.82	46.9711	5.4	1.06966	10	140	1.48	0.45	2.28	0.14	12.5	28	8.52	3.88	364	16.8	3.74	66	1.67	1.2	3.68	0.55	3.32	19.6	0.75	2.16	0.31	2.12	0.34	18.5714	5.89623	4.22936	1.04814	0.988884
10SR-27	92.02	29.2	Basalt	195	49.19	1.28	17.12	11.47	0.16	8.02	7.65	1.67	0.08	0.17	3.05	99.87	58.1237	1.75	1.02098	2	33.4	0.84	0.26	3.6	0.24	6.04	15.1	2.91	2.26	278	10.8	3.14	81	1.93	0.92	3.62	0.6	3.87	20	0.81	2.11	0.31	2	0.31	13.9	3.02	2.16624	1.29508	0.834243
10SR-28	92.02	29.2	Basalt	195	47.08	1.05	19.6	14.22	0.74	2.74	12.26	0.65	0.16	0.14	1.16	112.841	27.667	0.81	0.831436	2	49	2.01	0.56	3.1	0.2	17.6	38.4	12.8	5.32	275	22.9	5.14	99	2.44	1.36	5.36	0.89	5.36	31.1	1.17	3.19	0.49	3.17	0.51	8.84244	5.55205	3.98248	1.13167	0.792134
10SR-31	92.02	29.2	Basalt	195	49.22	1.27	20.37	10.57	0.22	5.44	4.18	5.21	0.39	0.31	2.68	99.86	50.5352	5.6	1.22651	12	229	1.97	0.5	3.09	0.18	12.2	31	10.8	4.63	550	21.1	5.09	81	2.14	1.49	4.94	0.77	4.68	24.7	1.02	2.69	0.41	2.58	0.41	22.2672	4.72868	3.39188	1.21406	0.908422
10SR-32	92.02	29.2	Basalt	195	50.03	1.16	16.02	11.18	0.16	7.33	9.73	2.68	0.06	0.15	1.3	110.181	56.5496	2.74	0.721731	1	36.4	0.79	0.25	3.06	0.21	5.88	14	11.2	2.11	435	9.87	2.78	72	1.83	0.96	3.41	0.57	3.55	18.3	0.75	2.02	0.3	1.9	0.29	23.7705	3.09474	2.21985	1.25052	0.953225
10SR-33	92.02	29.2	Basalt	195	49.48	1.02	19.87	11.58	0.22	4.63	4.75	5.3	0.22	0.25	2.51	110.509	44.2487	5.52	1.12834	5	122	1.64	0.44	2.6	0.15	12.3	28.6	7.23	4.12	578	19.1	4.64	69	1.69	1.39	4.61	0.71	4.29	23.2	0.92	2.51	0.36	2.35	0.38	24.9138	5.23404	3.75438	1.22181	0.918817
10SR-35	92.02	29.2	Basalt	195	49.3	0.91	20.74	12.44	0.14	4.01	4.83	4.76	0.77	0.07	1.85	99.82	39.0199	5.53	1.18759	20	250	0.69	0.17	3.26	0.18	11.3	25.6	4.1	3.48	848	15.6	3.78	84	2.07	1.36	3.69	0.56	3.37	15.9	0.7	1.89	0.28	1.92	0.31	53.3333	5.88542	4.22161	1.17475	1.11328
10SR-39	92.02	29.2	Basalt	195	50.09	0.83	17.27	10.59	0.16	7.25	8.08	3.47	0.21	0.14	1.72	109.651	57.6089	3.68	0.836169	3	101	0.76	0.23	1.74	0.11	6.98	16.7	3.46	2.35	741	11.1	2.92	71	1.73	1.03	3.19	0.52	3.29	18	0.71	1.93	0.28	1.89	0.28	41.1667	3.69312	2.64907	1.16506	1.03175
10SR-41	92.02	29.2	Basalt	195	54.09	0.69	17.37	9.23	0.17	4.67	7.49	2.55	0.63	0.17	2.83	108.426	50.1087	3.18	0.93784	11	138	0.57	0.21	0.93	0.05	5.3	12.8	4.11	1.98	500	9.38	2.58	42	1.2	0.86	2.92	0.5	3.2	18.4	0.71	2.02	0.31	2.05	0.33	27.1739	2.58537	1.85448	1.04475	0.957901
10SR-43	92.02	29.2	Basalt	195	52.38	0.91	19.72	9.76	0.15	5.51	3.3	4.73	0.24	0.16	3.03	108.931	52.845	4.97	1.40328	6	80.1	0.83	0.36	1.32	0.08	7.34	17.9	3.22	2.63	614	12.3	3.1	65	1.7	0.77	3.11	0.49	2.86	13.8	0.59	1.58	0.23	1.49	0.23	44.4928	4.92617	3.53354	1.28468	0.758147
10SR-44	92.02	29.2	Andesite	195	55.29	0.4	16.75	11.33	0.11	3.92	3.45	0.88	1.24	0.14	6.8	100.31	40.7161	2.12	1.84528	28	252	1.56	0.85	2.05	0.16	11.5	23.1	4.57	2.74	245	11.7	2.23	69	2.11	0.56	2	0.3	1.78	9.87	0.38	1.15	0.19	1.44	0.23	24.8227	7.98611	5.72843	0.827318	0.81067
10SR-48	92.02	29.2	Andesite	195	56.9	0.99	16.39	7.75	0.08	3.99	2.92	4.19	2.03	0.35	4.45	107.209	50.5437	6.22	1.13704	73	158	13.2	3.63	8.37	0.62	29.8	61.4	24.2	7.61	329	29.5	5.27	211	5.55	1.18	4.42	0.63	3.41	17.1	0.69	1.88	0.28	1.86	0.28	19.2398	16.0215	11.4922	1.22703	0.747462
X1	88.4529	29.3528	Diabase	165.3	48.31	1.27	17.23	3.86	0.31	6.34	9.32	1.26	1.52	0.24	3.25	98.74	76.5282	2.78	0.832448	47.7	158	2.31	0.46	7.67	1.07	11.2	25.6	24.3	3.33	489	17.1	3.71	70.8	1.73	1.47	3.48	0.52	2.74	0.53	1.56	0.25	1.29	15.3	0.19	922.642	0.732026	0.525082	0.11986	1.25073
X2	88.4529	29.3528	Diabase	165.3	49.92	0.84	15.26	1.22	0.25	11.87	8.93	1.02	0.76	0.26	2.07	99.38	95.0772	1.78	0.813082	36.1	155	2.43	1.47	3.25	0.21	11	25.4	46.5	3.29	485	15	3.38	71.3	1.87	1.17	3.58	0.49	2.81	0.6	1.72	0.23	1.51	13.6	0.24	808.333	0.808824	0.580169	0.138287	1.02828
X3	88.4529	29.3528	Diabase	165.3	50.07	1.19	16.45	1.1	0.32	7.91	8.53	0.66	1.7	0.47	3.24	98.76	93.4531	2.36	0.890765	66.4	103	2.36	0.56	9.55	0.52	21.2	47.5	28.5	6.21	294	31	6.22	132	3.44	2.14	5.9	0.84	4.53	0.86	2.48	0.42	2.2	21.8	0.32	341.86	0.972477	0.697557	0.139078	1.07998
X4	88.4529	29.3528	Diabase	165.3	47.44	0.84	14.32	3.86	0.48	9.17	12.12	0.38	0.68	0.17	3.21	98.71	82.5046	1.06	0.610954	26.2	82.5	0.56	0.15	1.7	0.13	7.4	17.7	16.8	2.37	417	13.3	3.37	42.8	0.98	1.5	3.39	0.56	3.3	0.66	1.9	0.34	1.7	16.1	0.25	631.818	0.459627	0.32969	0.137184	1.35675
X5	88.4529	29.3528	Diabase	165.3	47.48	2.92	14.01	3.69	0.23	4.45	10.18	1.37	0.15	0.8	3.63	98.57	70.5354	1.52	0.668455	19.9	30.7	1.31	0.34	10.3	0.61	22.8	59.2	11.2	6.62	265	37.9	8.3	160	4.03	2.72	8.35	1.32	7.23	1.39	4	0.67	3.29	31.7	0.48	190.647	0.719243	0.515913	0.152649	0.998873
X6	88.4529	29.3528	Diabase	165.3	52.25	1.8	15.71	6.16	0.29	4.92	7.98	3.99	0.34	0.47	0.96	99.99	61.3223	4.33	0.731782	12.9	80.8	2.59	2.91	10.3	0.62	13.2	29.8	20.4	3.81	452	17.7	4.47	145	3.47	1.06	5.32	0.77	4.55	0.92	2.51	0.36	2.24	21.1	0.37	491.304	0.625592	0.448737	0.144326	0.664538
X7	88.4529	29.3528	Diabase	165.3	52.61	1.73	15.18	4.95	0.26	4.46	7.82	3.46	0.34	0.45	2.08	99.01	64.1392	3.8	0.747608	18	101	1.12	0.22	11.4	0.67	17.2	45.2	21	4.98	373	26.6	5.7	135	3.42	1.61	5.75	0.89	4.87	0.96	2.83	0.48	2.47	24.3	0.36	388.542	0.707819	0.507718	0.134134	0.859762
X8	88.4529	29.3528	Diabase	165.3	51.16	1.81	15.48	5.77	0.17	4.37	7.43	4.57	0.75	0.44	1.92	99.01	60.0546	5.32	0.707967	35.5	142	0.99	0.46	12.1	0.71	17.9	42.8	11.9	5.36	414	26.7	5.78	132	3.32	2.3	5.7	0.88	4.96	0.97	2.79	0.47	2.49	24.3	0.36	426.804	0.736626	0.528381	0.136613	1.22504
X9	88.4529	29.3528	Diabase	165.3	53.25	1.84	15.65	5.54	0.24	4.31	8.76	1.15	1.53	0.47	1.6	99.5	60.697	2.68	0.802241	60.5	405	3.56	4.41	10.9	0.67	17.7	38.6	7.35	4.97	256	21.8	5.01	153	3.62	1.61	6.05	0.87	5.01	1.01	2.88	0.38	2.53	23.2	0.37	253.465	0.762931	0.54725	0.144532	0.894032
X10	88.4529	29.3528	Diabase	165.3	51.65	1.78	15.29	5.02	0.24	4.19	9.1	1.42	1.25	0.42	2.38	98.77	62.3615	2.67	0.754409	35.9	306	1.15	0.34	11.4	0.8	17.6	36.8	6.62	4.66	181	23.5	5.2	130	3.32	1.89	5.28	0.81	4.71	0.92	2.6	0.44	2.35	24.5	0.33	196.739	0.718367	0.515285	0.128668	1.10272
X11	88.4529	29.3528	Diabase	165.3	46.9	1.77	15.85	6.59	0.15	3.85	8.97	3.03	0.4	0.44	4.77	98.86	53.6975	3.43	0.728498	19.6	36.3	1.07	0.37	11.3	0.67	9.9	23.4	7.59	2.89	469	15.3	3.71	127	3.13	1.21	3.93	0.69	4.21	0.86	2.54	0.47	2.54	21.5	0.36	545.349	0.460465	0.330291	0.131057	0.968781
X13	88.4529	29.3528	Diabase	165.3	50.27	0.92	18.69	1.62	0.28	6.62	9.55	0.43	1.66	0.28	2.55	98.88	89.0252	2.09	0.939038	98.8	185	1.76	0.21	6.23	0.51	11	22.4	23.55	3.32	461	17.8	3.94	94.2	2.87	1.26	4.11	0.64	3.61	0.76	2.08	0.28	2.04	18.2	0.25	606.579	0.604396	0.433533	0.132755	0.95725
X14	88.4529	29.3528	Diabase	165.3	46	1.03	17.91	4.24	0.2	5.79	10.02	2.11	1.17	0.24	3.16	98.98	73.0511	3.28	0.778981	44.7	71.5	0.93	0.28	2.45	0.17	7.5	18.5	10.48	3.06	698	18.1	4.38	32.9	1.08	1.61	4.39	0.66	3.57	0.75	2.08	0.28	2.03	17.5	0.23	930.667	0.428571	0.307414	0.136535	1.12248
X15	88.4529	29.3528	Diabase	165.3	43.56	2.88	17.03	5.9	0.16	4.7	8.67	2.9	1.75	0.87	3.02	98.98	61.2601	4.65	0.75818	78.5	149	1.53	0.58	22.7	1.39	23.1	51.3	11.1	8.15	521	46.1	10.54	190.1	5.13	4.05	10.29	1.43	7.41	1.44	3.73	0.46	3.23	32.8	0.36	361.806	0.704268	0.505171	0.151203	1.18891
X16	88.4529	29.3528	Diabase	165.3	48.2	2.31	14.8	5.89	0.21	4.4	9.25	3.7	0.47	0.41	2.84	99.07	59.7245	4.17	0.631256	18.4	21.4	0.95	0.39	12.5	0.77	14.7	29.3	5.35	4.4	475	24.3	5.77	104	2.79	1.93	5.94	0.9	4.89	0.98	2.64	0.34	2.34	22.9	0.27	484.694	0.641921	0.46045	0.142919	1.00786
14JC01	92.73	29.4888	Rhyolite	171	72.56	0.38	13.24	2.31	0.08	0.59	2.44	3.39	2.57	0.08	3.1	100.74	33.6433	5.96	1.03356	70	424	8.73	1.95	9.39	0.63	23.9	47.7	13.7	5.58	213	20.8	4.68	177	4.32	1.27	4.76	0.75	4.69	28.4	1.03	3.05	0.48	3.3	0.5	7.5	7.24242	5.19499	0.951205	0.822623
14JC02	92.73	29.4808	Rhyolite	172	74.92	0.36	12.71	1.91	0.07	0.44	1.36	4.08	3.16	0.05	1.08	100.14	31.3795	7.24	1.00726	75.1	703	9.74	1.9	11.7	0.7	27	58.1	13.2	6.93	158	26.5	5.96	262	6.33	1.26	5.99	0.96	5.86	36	1.27	3.76	0.59	3.97	0.6	4.38889	6.80101	4.87836	0.987921	0.6447
14YB05	91.2768	29.739	Dacite	182	64.81	0.66	15.45	4.3	0.13	1.34	4.4	0.59	2.95	0.15	5.98	100.76	38.2182	3.54	1.26785	99.5	592	6.46	1.81	8.32	0.52	18.4	34.7	5.39	5.14	112	21.1	5.14	216	5.43	1.33	5.32	0.9	5.66	39	1.24	3.81	0.59	3.9	0.61	2.87179	4.71795	3.38418	0.971331	0.777567
14YB06	91.2817	29.7294	Rhyolite	176	75.41	0.29	13.49	2.39	0.11	0.84	0.75	2.29	3.34	0.07	2.08	101.06	41.096	5.63	1.54035	130	591	8.69	1.85	10.8	0.75	15.6	23.4	4.25	2.87	74.4	9.74	1.89	95.3	2.47	0.47	1.98	0.25	1.48	10	0.32	1.04	0.18	1.34	0.21	7.44	11.6418	8.35065	0.739217	0.742776
14YB08	91.282	29.7282	Dacite	178	58.98	1.18	15.99	8.54	0.39	2.32	3.38	2.4	2.57	0.26	4.56	100.57	35.034	4.97	1.24016	109	459	3.26	1.13	5.15	0.3	15.3	31.8	6.98	5.05	146	22.6	6.18	140	3.48	1.9	6.42	1.13	7.04	41.5	1.51	4.35	0.65	4.26	0.63	3.51807	3.59155	2.57622	1.10606	0.92218
14YB09	91.2828	29.7219	Andesite	179	60.53	0.79	16.38	7.97	0.14	3.5	1.7	6.26	0.1	0.12	2.66	100.15	46.5736	6.36	1.21301	4.52	29.4	3.02	0.67	4.43	0.28	9.22	18	4.67	2.52	202	10.5	2.62	85.9	2.07	0.89	2.57	0.44	2.62	16	0.56	1.61	0.24	1.62	0.24	12.625	5.69136	4.08241	1.08243	1.04857
14YB10	91.2798	29.7294	Basalt	168	48	0.99	17.3	9.89	0.19	7.55	8.79	1.84	0.01	0.26	5.54	100.36	60.2447	1.85	0.908217	0.67	10.2	1.28	0.37	6.03	0.23	10.9	20.5	5.44	3.17	528	14	3.46	87.4	1.75	1.2	3.53	0.56	3.46	22.3	0.71	2.09	0.3	1.97	0.29	23.6771	5.53299	3.96881	1.17551	1.04973
14YB12	91.2796	29.7178	Andesite	178	57.59	0.73	15.77	7.13	0.14	4.48	7.17	3.07	1.68	0.19	2.58	100.53	55.5017	4.75	0.79114	42.7	282	4.11	1.12	5.48	0.34	14.2	24.8	8.98	3.59	425	14.6	3.52	110	2.58	1.07	3.52	0.58	3.53	21.5	0.75	2.22	0.35	2.26	0.34	19.7674	6.28319	4.50693	1.0454	0.929319
14YB13	91.2794	29.7164	Rhyolite	172	74.95	0.42	12.39	3.57	0.1	0.95	3.91	1.07	1.16	0.09	2.34	100.95	34.5651	2.23	1.22179	42.3	265	2.44	0.75	3.24	0.2	10.7	21	11.4	3.21	195	14.1	3.8	117	3.1	0.96	3.95	0.72	4.55	30.2	1.03	3.03	0.48	3.19	0.48	6.45695	3.35423	2.40599	0.954632	0.757538
14YB15	91.2794	29.7162	Andesite	174	56.56	0.78	15.29	7.91	0.12	4.71	7.31	3.03	0.04	0.21	4.28	100.24	54.1705	3.07	0.833566	0.84	35	2.8	0.62	4.47	0.25	12.4	22.7	5.29	3.33	251	13.9	3.38	82.5	1.9	1.01	3.29	0.55	3.3	19.6	0.69	2.05	0.3	1.97	0.3	12.8061	6.29442	4.51498	1.12115	0.925953
14YB26	91.6641	29.7265	Rhyolite	172	67.38	0.4	14.48	3.13	0.11	1.27	2.07	4.22	4.1	0.13	2.82	100.11	44.6118	8.32	0.955027	149	629	8.75	2.12	11.5	0.71	31.2	56	14.1	5.89	329	20.5	3.83	152	3.24	0.93	3.78	0.51	2.91	19.4	0.61	1.88	0.3	2.01	0.31	16.9588	15.5224	11.1342	0.968974	0.747242
14YB27	91.6712	29.7357	Rhyolite	173	67.84	0.38	14.42	3.06	0.12	0.95	3.1	3.63	4.26	0.13	2.66	100.51	38.1294	7.89	0.887881	124	574	8.85	2.33	9.75	0.6	30.6	54.4	9.59	5.59	357	19.3	3.58	146	3.1	0.89	3.6	0.48	2.77	18	0.58	1.74	0.28	1.91	0.29	19.8333	16.0209	11.4918	0.970648	0.757916
14YB29	91.4478	29.7514	Basalt	174	48.42	1.08	18.64	11.21	0.15	4.29	7.9	4.91	0.04	0.2	2.7	99.54	43.1712	4.95	0.828061	0.84	39.8	1.51	0.23	5.16	0.26	12.4	25.1	6.03	3.95	382	17.2	4.34	108	2.3	1.38	4.29	0.7	4.24	24.5	0.89	2.57	0.38	2.5	0.37	15.5918	4.96	3.55781	1.13512	0.977753
XC5002	88.43	29.37	Quartz diorite	175	61.97	0.51	16.09	5.57778	0.27	2.73	4.1	3.93	1.98	0.21	2.36	104.884	49.2791	5.91	1.00051	61	462	6.03	1.79	8.32	0.65	24.7	46.8	77.6	5.1	419	19.8	3.75	41	2.1	1.07	3.44	0.45	2.47	13.3	0.51	1.53	0.23	1.67	0.25	31.5038	14.7904	10.6092	0.98991	0.910778
XC5-01	88.43	29.37	Quartz diorite	179	63.27	0.41	15.65	4.95889	0.15	1.94	3.75	6.22	1.86	0.21	1.56	104.551	43.7124	8.08	0.820164	53.5	692	6.1	1.71	8.52	0.66	22.3	41.6	51.8	4.79	460	18.7	3.65	63.2	3.35	1.23	3.61	0.51	2.97	16.6	0.62	1.87	0.26	1.93	0.3	27.7108	11.5544	8.28797	1.02995	1.03593
XC5012	88.43	29.37	Quartz diorite	175	63.14	0.45	15.71	5.10222	0.25	1.61	5.41	4.93	1.92	0.22	1	104.437	38.5139	6.85	0.78362	55.1	607	6.36	1.47	8.46	0.64	22.6	42.3	72.6	4.72	700	18.1	3.5	44	2.35	1.22	3.48	0.48	2.72	15.4	0.57	1.73	0.25	1.82	0.27	45.4545	12.4176	8.90713	1.00026	1.06871
Q810-10	90.58	29.42	Andesite	189	54.07	0.54	15.82	8.65	0.14	7.02	5.1	4.96	0.52	0.16	2.16	99.14	61.7005	5.48	0.878228	6.86	106.9	1.33	0.48	1.24	0.09	7.83	19	5.17	2.72	303	13.53	3.22	80.6	2.39	0.95	3.11	0.42	2.46	13.5	0.47	1.45	0.2	1.39	0.21	22.4444	5.63309	4.04062	1.1845	0.917781
Q810-11	90.58	29.42	Andesite		55.96	0.47	15.64	7.54	0.13	6.02	5.44	5.16	0.41	0.15	2.06	98.98	61.3136	5.57	0.830039	5.46	93.1	1.4	0.56	1.04	0.08	7.64	18.6	5.15	2.64	339	13.12	3.04	82.3	2.42	0.99	2.86	0.39	2.27	12.8	0.44	1.37	0.19	1.35	0.21	26.4844	5.65926	4.05938	1.1254	1.02645
Q810-12	90.58	29.42	Andesite		52.99	0.54	16.34	8.48	0.14	7.27	5.21	5.3	0.47	0.16	2.12	99.02	62.9878	5.77	0.87291	5.76	99.8	1.33	0.5	1.7	0.11	8.95	20.5	4.82	2.88	331	14.5	3.2	79.4	2.37	0.94	3.02	0.41	2.36	13.2	0.46	1.42	0.2	1.37	0.21	25.0758	6.53285	4.68601	1.15294	0.924428
Q810-13	90.58	29.42	Andesite		53.08	0.54	16.38	8.46	0.14	7.27	5.23	5.04	0.47	0.16	2.14	98.91	63.0429	5.51	0.89373	25.2	207.2	1.69	0.59	1.51	0.09	9.38	23	6.32	3.15	255	15.89	3.53	96.2	2.94	0.91	3.19	0.4	2.32	12.7	0.44	1.34	0.19	1.35	0.2	20.0787	6.94815	4.9839	1.15019	0.829053
Q810-14	90.58	29.42	Andesite		53.73	0.59	15.07	8.77	0.14	8.52	3.85	3.66	2.36	0.18	1.9	98.77	65.8525	6.02	0.966358	25.36	197.2	1.7	0.57	1.39	0.1	9.61	23.4	6.13	3.23	221	16.55	3.66	91.8	2.77	0.88	3.36	0.45	2.54	13.5	0.48	1.5	0.2	1.44	0.21	16.3704	6.67361	4.78698	1.18056	0.767178
Q810-15	90.58	29.42	Andesite		46.63	0.71	13.44	10.01	0.16	10.55	11.12	2.47	0.32	0.15	4.16	99.72	67.66	2.79	0.5449	26.72	141.7	1.24	0.46	1.02	0.07	6.46	16.7	3.13	2.48	317	12.66	3.21	73.5	2.33	0.93	3.05	0.42	2.5	13.2	0.48	1.5	0.2	1.4	0.21	24.0152	4.61429	3.30983	1.19516	0.908666
Q810-16	90.58	29.42	Andesite		50.19	0.74	15.87	9.03	0.14	7.75	8.37	3.22	1.46	0.17	1.86	98.8	63.0134	4.68	0.717222	26.3	164	1.12	0.35	1.17	0.08	7.52	18.7	3.95	2.65	407	14.01	3.33	80.7	2.48	0.93	3.42	0.48	2.94	16.2	0.58	1.79	0.25	1.75	0.26	25.1235	4.29714	3.08234	1.12441	0.842503
Q810-17	90.58	29.42	Andesite		46.73	0.71	13.46	10.01	0.15	10.6	11.15	2.23	0.32	0.15	4.16	99.67	67.7634	2.55	0.553343	3.99	48.2	0.84	0.28	0.81	0.06	5.88	14.8	4.89	2.24	452	12.13	3.05	62	2.06	0.99	3.13	0.45	2.74	14.3	0.52	1.64	0.22	1.49	0.22	31.6084	3.94631	2.83069	1.23078	0.979573
Q810-18	90.58	29.42	Andesite		49.24	0.68	13.43	9.58	0.15	10.74	10	2.59	0.21	0.14	3.12	99.88	68.9963	2.8	0.591548	2.5	42.5	0.82	0.28	0.82	0.06	5.72	15.1	3.55	2.29	382	12.57	3.14	60.6	2.01	0.92	3.21	0.44	2.74	14.3	0.52	1.62	0.22	1.45	0.22	26.7133	3.94483	2.82962	1.26473	0.885919
Q810-19	90.58	29.42	Diorite	226	61.27	0.53	15.67	6.91	0.16	3.88	6.4	3.35	0.57	0.14	0.82	99.71	52.7102	3.92	0.880983	7.76	126.6	1.25	0.41	1.04	0.07	7.81	19.2	4.13	2.68	394	13.02	3.29	88.8	2.61	0.8	3.22	0.47	2.84	16.4	0.57	1.77	0.26	1.74	0.26	24.0244	4.48851	3.2196	1.09241	0.751429
Q810-20	90.58	29.42	Diorite		61.79	0.54	15.79	6.94	0.16	3.9	6.47	3.36	0.57	0.14	0.8	100.46	52.7304	3.93	0.880603	7.56	128.9	1.2	0.41	1.03	0.07	7.28	17.8	4.17	2.5	394	12.17	3.13	89	2.73	0.8	3.12	0.45	2.77	16.3	0.55	1.79	0.25	1.73	0.26	24.1718	4.20809	3.01846	1.07164	0.782644
5001-364.5	88.4	29.4	Diorite	173.4	62.45	0.44	17.12	9.82222	0.16	1.87	4.72	3.71	2.32	0.18	0.71	112.509	27.4271	6.03	0.9943	85.7	521	5.8	1.67	9.9	0.6	22.7	41.6	61	4.74	377	18	3.6		4.6	1.17	3.92	0.54	3.14	16.9	0.64	1.93	0.24	1.94	0.29	22.3077	11.701	8.39314	1.08329	0.952172
O1028	88.41	29.38	Diorite	184.5	60.67	0.43	17.72	6.67	0.1	2.19	5.99	2.31	1.73	0.11	2.15	99.47	39.4588	4.04	1.06825	72.1	225	3.66	1.23	6.9	0.5	15.3	29.5	22	3.39	438	13.3	2.72		4.3	1	2.85	0.46	2.69	15.6	0.57	1.7	0.26	1.69	0.29	28.0769	9.05325	6.4939	1.06532	1.09804
RT06-01	88.39	29.41	Granodiorite	168	63.81	0.35	16.79	5.93	0.04	1.03	2.93	3.92	2.79	0.14	1.11	98.37	25.639	6.71	1.13344	58.6	605	5.66	2.32	8.9	0.6	23.9	48.8	14	5.6	496	20.8	3.93		4.8	1.1	3.85	0.52	2.91	16.1	0.58	1.75	0.22	1.81	0.27	30.8075	13.2044	9.47152	1.07604	0.864549
RT06-03	88.4	29.4	Monzonite/Syenite	149.1	69.83	0.57	15.26	6.35556	0.09	0.57	1.12	4.37	3.91	0.12	1.22	109.228	15.1126	8.28	1.13271	89.1	753	9.75	2.8	29.1	2.1	39	77	49	9.39	222	35.4	7.18		12	1.7	7.51	1.18	7.13	36.1	1.45	4.27	0.59	4.35	0.64	6.14958	8.96552	6.43096	1.09702	0.707767
RT06-07	88.4	29.4	Granite	172.2	72.52	0.16	13.76	4.35556	0.04	0.57	1.17	2.76	4.42	0.03	1.21	104.983	20.621	7.18	1.19987	128.5	1005	13.75	2.93	8.7	0.9	30	52.7	59	5.31	164.5	17	2.87		5.9	0.45	3.02	0.42	2.66	15.6	0.56	1.81	0.25	2.1	0.33	10.5449	14.2857	10.2471	0.847769	0.467296
RT06-16	88.76	29.36	Granodiorite	170.3	68.41	0.41	15.44	4.14	0.08	1.57	3.89	3.21	2.25	0.09	0.62	99.78	42.9481	5.46	1.04269	44.5	433	6.03	1.22	5.3	0.5	15	26.4	9	2.84	300	10.1	1.94		7.8	0.65	2.17	0.31	2.02	11.6	0.42	1.32	0.17	1.43	0.22	25.8621	10.4895	7.52412	0.945433	0.968515
RT06-17	88.4	29.4	Latite	152.6	75.4	0.05	13.26	2.46667	<0.01	0.05	0.32	4.1	4.36	0.02	0.31	102.588	3.86813	8.46	1.09959	79.9	155	12.45	2.53	38.6	2.8	50.3	96.8	9	11.55	35.3	41.9	8.03		10.2	0.39	8.24	1.28	7.55	40.8	1.57	4.7	0.67	4.8	0.71	0.865196	10.4792	7.5167	1.05274	0.146577
RT06-19	88.4	29.4	Andesite	151.9	75.36	0.06	13.65	2.57778	<0.01	0.06	0.38	3.87	4.38	0.02	0.89	103.601	4.41635	8.25	1.15564	76.4	666	10.3	2.8	21.4	1.9	12.6	18.5	13	2.52	75	9.3	1.97		8.5	0.32	1.96	0.36	2.54	17.2	0.64	2.07	0.4	2.6	0.47	4.36047	4.84615	3.47614	0.653846	0.497866
RT06-21	88.59	29.37	Granodiorite	168.8	63	0.35	16.69	4.69	0.12	1.75	5.37	3.83	0.93	0.12	2.02	98.56	42.5517	4.76	0.976527	21.3	570	3.27	1.14	6.6	0.5	13.7	25.7	12	2.98	837	11.4	2.22		4.3	0.76	2.49	0.36	2.32	13.5	0.48	1.51	0.19	1.58	0.24	62	8.67089	6.21962	0.982757	0.988237
RT06-23	88.54	29.35	Monzonite	151.6	68.4	0.3	17.2	2.43	0.12	0.98	1.59	2.68	4.07	0.03	2.25	100	44.4617	6.75	1.46739	101	1015	12.6	3.26	34.5	2.5	44.8	93	23	11.7	136	42.5	9.35		15.1	2.01	9.27	1.7	10.2	60.4	2.2	6.53	0.97	6.43	1.03	2.25166	6.96734	4.99767	1.06171	0.660046
RT06-24	88.4	29.4	Diorite	151	75.73	0.12	12.85	2.77778	0.03	0.18	0.75	3.76	3.65	0.03	0.5	102.916	11.3972	7.41	1.11618	57.6	354	11.4	3.24	35.3	2.9	42.8	88.6	15	10.15	153	36	6.93		9.5	0.49	7.18	1.16	7.2	39.5	1.55	4.75	0.7	5.17	0.81	3.87342	8.27853	5.93819	0.932089	0.212369
RT06-28	88.4	29.4	Granodiorite	153.5	76.61	0.09	13.27	2.44444	0.01	0.18	0.86	4.01	3.3	0.03	0.43	103.469	12.7531	7.31	1.1299	45.5	766	8.92	2.05	13.9	1.3	42.9	74.9	11	8.17	143	26.6	4.37		7.9	0.86	3.97	0.54	3.33	20.9	0.71	2.12	0.34	2.33	0.36	6.84211	18.412	13.2069	0.956541	0.631228
RT06-S02	88.4	29.4	Diorite	178.1	63.4	0.46	17.49	5.13333	0.18	1.85	8.29	1.92	2.62	0.18	0.9	107.152	41.7044	4.54	0.828858	65.7	586	6.74	1.61	9.2	0.7	28.1	49.8	157	5.5	502	20.1	3.5		5.9	1.13	3.48	0.45	2.64	14.6	0.52	1.62	0.2	1.63	0.26	34.3836	17.2393	12.3657	1.08401	0.989871
RT06-S07	91.6	29.63	Granodiorite	173.5	64.46	0.48	17.47	3.97	0.1	1.35	3.87	6.25	0.87	0.17	1.41	100.1	40.2992	7.12	0.955939	26.8	230	6.46	1.86	9.4	0.7	24.4	43.7	5	5.02	475	19.1	3.67		4.5	1.1	3.79	0.52	3.08	16.9	0.62	1.91	0.23	1.85	0.28	28.1065	13.1892	9.4606	1.11428	0.901703
RT06-S26	88.4	29.4	Syenomonzonite	200.4	75.76	0.13	13.02	2.02222	0.05	0.14	0.65	3.07	4.95	0.04	1.05	102.731	12.0823	8.02	1.12185	490	203	50	28.2	74.6	8.3	59.7	111.5	39	10.45	60.9	30.3	5.24		8.2	0.5	5.58	1	6.73	44.4	1.53	5.37	0.95	6.47	0.98	1.37162	9.2272	6.61867	0.696187	0.28269
RT06-S27	88.4	29.4	Syenomonzonite	200.4	78.04	0.09	12.59	0.777778	<0.01	0.15	0.1	2.71	5.09	0.02	0.65	100.931	27.6847	7.8	1.23872	510	88.6	15.45	10	93.9	12.4	28.3	50.2	30	4.63	28.9	13.5	2.47		8.1	0.29	2.93	0.57	3.99	37	0.98	3.57	0.65	4.84	0.77	0.781081	5.84711	4.19413	0.551751	0.329564
RT06-S30	88.4	29.4	Diorite	190.3	79.11	0.16	10.58	4.31111	0.02	0.29	1.11	2.49	2.65	0.03	1.09	105.781	11.7801	5.14	1.17637	55.2	584	4.83	0.88	2.8	0.3	18.1	31.7	16	3.2	213	10.7	1.77		6.4	0.45	1.83	0.21	1.33	7.5	0.24	0.8	0.08	0.88	0.12	28.4	20.5682	14.7535	1.01154	0.764406
RT06-S33	88.35	29.39	Diorite	151.8	55.5	1.13	17.85	8.12	0.1	3.8	6.62	4.32	1.16	0.33	1.39	99.6	48.1588	5.48	0.873986	27.6	223	3.85	1.15	12.7	1	23.6	47.5	8	5.8	669	22.9	5.09		4.7	1.53	4.71	0.75	4.15	22.8	0.83	2.32	0.36	2.17	0.33	29.3421	10.8756	7.80105	1.27998	0.955313
RT06-S34	88.4	29.4	Diorite	151.8	67.21	0.72	15.52	7.37778	0.07	1.03	2.09	4.18	3.53	0.16	0.89	109.534	21.6995	7.71	1.06931	67.3	829	11	3.14	29.7	2.2	41.1	81.3	6	9.61	280	35.4	6.89		12.1	1.75	7.02	1.06	6.22	33.7	1.28	3.87	0.52	3.75	0.58	8.30861	10.96	7.8616	1.11013	0.769278
RT06-S35	88.35	29.39	Monzonite	151.9	64.37	1.06	16.11	5.42	0.14	1.43	2.63	4.57	3.07	0.29	0.83	99.49	34.3717	7.64	1.03005	62.3	682	5.03	1.31	29.6	1.8	36.5	76.7	10	9.85	312	40.4	8.6		8.6	2.46	8.63	1.34	7.59	39.2	1.59	4.37	0.64	4.07	0.59	7.95918	8.96806	6.43278	1.24814	0.87298
RT06-S40	88.5	29.36	Granodiorite	151.8	65.19	0.96	16.72	5.4	0.12	1.19	3.41	3.73	2.13	0.27	0.92	99.6	30.4323	5.86	1.14061	46	512	6.02	1.71	18.6	1.3	32	67.7	15	8.34	424	33.5	7.04		7.9	1.92	6.68	1.05	6.08	35.3	1.31	3.78	0.59	3.68	0.6	12.0113	8.69565	6.23739	1.10579	0.855954
RT06-S63	89.38	29.38	Monzonite	160	66.02	0.77	15.4	4.3	0.07	1.35	2.61	3.66	4.24	0.18	1.18	99.44	38.3939	7.9	1.00156	132	610	14.9	3.38	19.2	1.4	34.2	68.1	12	7.83	266	28.8	5.68		10.6	1.19	5.57	0.85	4.88	27.8	1.07	3.13	0.46	3.21	0.49	9.56835	10.6542	7.64226	1.01749	0.646798
RT06-S83	88.45	29.34	Monzonite	171	57	0.84	19.52	5.68	0.1	2.37	5.13	6.42	0.97	0.27	2.02	99.85	45.3036	7.39	0.931368	62.4	217	4.72	1.01	6.7	0.4	22	44.5	20	5.43	484	21.3	4.75		3.5	1.42	5.37	0.9	4.64	26.5	1.05	2.81	0.45	2.8	0.43	18.2642	7.85714	5.63593	1.10911	0.859564
x6078-22	88.41	29.39	Granodiorite	173.7	65.56	0.34	16.78	5.13	0.12	1.47	5.19	1	2.6	0.11	1.12	99.02	36.2578	3.6	1.20549	76	748	3.42	1.01	7.7	0.5	16.8	31.2	22	3.4	239	12.3	2.31		4.6	0.96	2.48	0.34	1.93	10.5	0.39	1.1	0.17	1.09	0.2	22.7619	15.4128	11.0556	1.18508	1.2262
XE-OC-IUQ	88.4	29.4	Quartz diorite	173	66.6	0.37	16.69	8.42222	0.06	0.88	2.43	4.31	2.26	0.13	1.52	111.378	17.1781	6.57	1.19478	53.3	712	5.49	1.82	10.2	0.6	20.5	36.7	<5	4.11	401	15.9	3.13		4.7	1.01	2.92	0.44	2.51	15.4	0.53	1.64	0.25	1.68	0.29	26.039	12.2024	8.75276	0.999953	1.02137
15TB-1	88.83	29.42	Gabbro	178	44.53	0.52	16.87	10.29	0.14	11.14	13.67	0.98	0.15	0.01	1.82	100.3	68.2442	1.13	0.632452	1.86	31.1	0.1	0.05	0.35	0.03	1.55	3.7	0.93	0.55	423	2.86	0.8	10.2	0.34	0.4	0.92	0.16	1.01	5.36	0.21	0.55	0.08	0.46	0.08	78.9179	3.36957	2.41699	1.46953	1.42543
15TB-3	88.83	29.5	Gabbro	192.3	46.51	0.78	19.13	10.52	0.19	7.29	12.07	2.31	0.26	0.11	1.05	100.3	57.905	2.57	0.733875	1.88	47.2	0.13	0.07	1.66	0.09	5.77	14.9	2.34	2.04	420	9.77	2.67	41	1.36	0.96	3.25	0.53	3.25	20	0.72	1.98	0.32	2	0.32	21	2.885	2.06941	1.0876	0.996317
TB-10-1	88.83	29.36	Tonalite		62.31	0.57	16.39	5.81	0.12	2.51	5.67	3.79	1.44	0.14	1.32	99.9	46.1663	5.23	0.904265	31.5	361	2.4	0.98	4.19	0.27	8.78	17.3	5.34	2.29	358	9.58	2.22	132	3.66	0.83	2.31	0.39	2.36	13.2	0.48	1.44	0.22	1.5	0.25	27.1212	5.85333	4.19859	1.05302	1.12052
TB-12-1	88.83	29.36	Tonalite		61.12	0.59	16.9	5.97	0.12	2.55	5.91	4.15	1.48	0.13	1.01	100	45.8842	5.63	0.880299	25.9	377	2.87	0.83	5.38	0.48	11.2	23.9	5.55	2.97	388	12.1	2.83	107	2.84	0.93	3.06	0.5	3.14	19.1	0.63	1.81	0.3	1.91	0.32	20.3141	5.86387	4.20615	1.1003	0.966168
TB-1-6	88.83	29.36	Tonalite	178.1	62.73	0.55	16.54	5.74	0.12	2.53	5.86	3.92	1.33	0.13	0.97	100.3	46.6652	5.25	0.890886	25.2	334	2.7	0.69	5.1	0.42	11.9	24.1	3.9	3.02	363	12	2.6	106	3.03	0.89	2.68	0.45	2.66	15.1	0.54	1.64	0.25	1.71	0.28	24.0397	6.95906	4.99173	1.04112	1.03076
TB-3	88.83	29.42	Gabbro		44.56	0.37	17.25	10.25	0.15	11.61	13.04	1.2	0.2	0.02	2.11	100.5	69.216	1.4	0.664928	2.05	35.9	0.16	0.14	0.46	0.04	1.42	3.3	0.62	0.49	394	2.45	0.75	7.93	0.26	0.35	0.83	0.13	0.88	4.82	0.19	0.49	0.07	0.42	0.06	81.7427	3.38095	2.42516	1.40232	1.35619
TB-5	88.83	29.43	Tonalite		56.69	0.66	18.37	7.4	0.12	3.68	7.14	4.02	1.44	0.27	0.1	99.7	49.6771	5.46	0.867283	28.1	378	0.59	0.52	3.23	0.19	8.41	19.8	3.68	2.91	695	12.8	2.81	76.7	2.23	0.98	2.58	0.4	2.24	11.8	0.43	1.25	0.18	1.2	0.19	58.8983	7.00833	5.02707	1.24934	1.11272
TB-8	88.83	29.5	Gabbro		46.52	0.79	19.05	11.2	0.18	7.14	11.77	2.34	0.23	0.14	0.98	100	55.8592	2.57	0.745963	1.06	49.3	0.19	0.07	1.71	0.11	5.99	14.9	4.66	2.07	422	9.81	2.76	43.6	1.3	0.93	3.05	0.49	3.29	19.4	0.74	2.04	0.3	1.96	0.3	21.7526	3.05612	2.19216	1.12345	0.979946
YB1302	91.275	29.6517	Basalt		41.46	1.26	16.86	13.35	0.15	9.39	7.48	3.3	0.1	0.39	5.52	99.24	58.2678	3.4	0.879874	1.39	52	1.85	0.5	5.83	0.3	17.3	34.8	2.58	4.46	347	20.1	4.77	98.4	2.39	1.61	4.83	0.79	4.87	27.9	0.97	2.73	0.39	2.57	0.4	12.4373	6.73152	4.82851	1.26827	1.02546
YB1303	91.275	29.6517	Basalt		40.83	1.14	17.89	11.2	0.19	10.65	7.59	2.9	0.12	0.34	6.17	99.03	65.3689	3.02	0.955365	1.72	65.4	1.7	0.51	5.16	0.27	15.1	30.6	3.06	3.97	307	18.1	4.43	86.8	2.22	1.51	4.34	0.72	4.37	25.3	0.89	2.45	0.36	2.29	0.36	12.1344	6.59389	4.72979	1.27721	1.05282
YB1304	91.275	29.6517	Basalt		47.87	0.9	17.14	10.15	0.15	6.6	8.16	2.84	2.15	0.34	3.63	99.93	56.3467	4.99	0.78379	38.7	711	2.16	0.56	4.67	0.22	18.4	37.3	2.82	4.78	351	20.9	4.58	80.8	1.95	1.41	4.26	0.66	3.73	21.5	0.75	2.01	0.3	1.9	0.3	16.3256	9.68421	6.94648	1.31392	0.9759
YB1306	91.2783	29.6517	Basalt		48.03	0.88	16.58	10.26	0.16	7.42	9.34	2.24	1.01	0.24	3.52	99.68	58.9422	3.25	0.760786	20.3	424	1.18	0.36	3.67	0.18	10.9	22.3	2.83	2.91	369	13.2	3.26	69.2	1.7	1.11	3.45	0.56	3.45	20.3	0.71	1.94	0.28	1.89	0.29	18.1773	5.7672	4.13681	1.22172	1.01188
YB1307	91.28	29.6533	Basalt		48.82	0.96	16.83	10.01	0.21	7.38	5.96	5.05	0.24	0.27	3.62	99.34	59.4075	5.29	0.866445	2.86	274	1.23	0.34	3.9	0.19	10.9	24.7	2.26	3.23	445	14.1	3.57	70.2	1.82	1.17	3.43	0.56	3.51	20.5	0.77	2.03	0.3	1.95	0.3	21.7073	5.58974	4.00952	1.20472	1.02218
YB1308	91.3833	29.6983	Dacite		65.02	0.72	13.91	5	0.09	1.47	3.86	3.06	2.36	0.17	3.36	99.02	36.853	5.42	0.951062	73.5	470	6.02	1.83	7.04	0.46	17.2	36.6	5.32	4.62	357	20	4.9	194	5.09	1.14	4.99	0.86	5.46	35	1.19	3.38	0.52	3.5	0.54	10.2	4.91429	3.52502	1.04409	0.704823
YB1309	91.43	29.7733	Dacite		63.75	0.59	16.38	5.25	0.07	1.61	4.14	2.35	2.76	0.18	2.61	99.67	37.84	5.11	1.13736	106	440	5.18	1.56	7.87	0.48	21.6	40.5	13.4	4.68	724	18.5	4.09	142	3.35	1.3	3.87	0.63	3.87	23.5	0.79	2.2	0.34	2.17	0.35	30.8085	9.95392	7.13994	1.19362	0.998964
YB1310	91.43	29.77	Dacite	178.3	66.17	0.72	15.69	4.45	0.12	1.42	1.95	3.74	2.45	0.18	2.39	99.29	38.7793	6.19	1.26909	96.4	367	5.74	1.58	9.14	0.6	25.3	47.7	11.6	5.66	338	23.2	5.51	151	3.92	1.86	5.36	0.91	5.63	34.4	1.18	3.34	0.49	3.31	0.53	9.82558	7.6435	5.48268	1.1384	1.04635
YB1311	91.43	29.7683	Basalt		47.93	1.09	18.06	10.89	0.18	5.02	7.35	4.35	0.3	0.33	3.89	99.38	47.7823	4.65	0.865378	8.07	54	1.95	0.65	3.75	0.2	14	29.5	3.22	3.93	323	18.3	4.69	77.3	2.01	1.49	4.71	0.73	4.38	25.4	0.89	2.48	0.36	2.34	0.36	12.7165	5.98291	4.29154	1.25278	0.969199
YB1315	91.415	29.735	Dacite		67.77	0.77	14.37	4.46	0.17	1.49	3.44	2.52	2.48	0.19	2.45	100.11	39.8739	5	1.09673	67.7	570	6.54	1.8	11.1	0.72	25.8	51.8	17.9	6.36	700	26.9	6.3	203	5.16	1.71	6.24	1.04	6.79	40.1	1.39	4.1	0.61	3.97	0.63	17.4564	6.49874	4.66154	1.14471	0.833791
YB1316	91.4133	29.7233	Dacite		66.81	0.47	14.22	3.1	0.11	1.01	3.57	3.3	2.6	0.13	4.34	99.65	39.2742	5.9	0.963884	80.5	428	6.83	1.87	9.56	0.64	22.6	42.6	13.6	4.72	222	18	3.72	198	4.63	1.06	3.34	0.57	3.51	22.2	0.76	2.21	0.34	2.38	0.38	10	9.4958	6.81133	0.987064	0.919358
YB1318	91.4133	29.7217	Rhyolite	177.9	71.02	0.43	13.91	2.58	0.09	0.82	2.3	4.39	2.19	0.11	2.46	100.29	38.6846	6.58	1.00885	69.2	468	8.89	2.55	11	0.77	27.3	51.2	14.2	5.69	462	21.4	4.37	212	5.06	1.1	3.97	0.67	4.19	27	0.91	2.64	0.43	2.99	0.48	17.1111	9.13043	6.54926	0.937903	0.807384
YB1319	91.415	29.72	Andesite		52.08	1.44	14.89	10.92	0.19	3.4	5.13	4.46	0.84	0.28	5.76	99.4	38.1976	5.3	0.846367	27.4	203	3.19	0.99	5.85	0.35	15	32	4.76	4.24	278	19.6	5.17	119	3.2	1.51	5.42	0.92	5.82	34.6	1.23	3.47	0.52	3.28	0.5	8.03468	4.57317	3.28033	1.18758	0.872079
YB1320	91.405	29.7083	Dacite	176.4	66.18	0.54	15.21	3.27	0.11	1.27	3.36	2.17	3.41	0.12	4.64	100.28	43.5333	5.58	1.1359	131	510	8.78	2.27	11.4	0.77	23.5	46.8	9.9	5.39	139	21.5	4.84	225	5.85	1.15	4.53	0.78	4.92	32.4	1.07	3.29	0.53	3.62	0.6	4.29012	6.49171	4.6565	0.909645	0.750844
YB1321	91.2817	29.695	Basalt		50.58	1.13	18	8.99	0.28	5.7	2.96	6.57	0.26	0.4	4.2	99.06	55.7249	6.83	1.09208	6.23	168	1.52	1.21	6.45	0.31	13.6	31.3	2.44	4.24	297	19.1	4.81	94.7	2.34	1.37	4.63	0.76	4.5	26.5	0.91	2.56	0.38	2.52	0.37	11.2075	5.39683	3.87114	1.19516	0.887526
YB1322	91.2817	29.7217	Basalt		47.56	0.93	16.09	9.45	0.18	6.65	10.58	1.47	0.07	0.27	6.1	99.32	58.2793	1.54	0.739258	1.23	12.8	1.06	0.32	4.34	0.23	9.98	22.2	8.54	2.95	666	13.6	3.26	70.8	1.76	1.14	3.38	0.56	3.51	20.3	0.71	2	0.3	1.92	0.29	32.8079	5.19792	3.72846	1.22355	1.04993
YB1323	91.2783	29.7367	Andesite	178	52.49	0.96	15.3	10.6	0.3	2.45	7.45	2.17	1.04	0.26	6.14	99.13	31.451	3.21	0.837523	31.6	167	2.42	0.66	4.31	0.26	14.6	30.1	6.4	3.88	222	17.9	4.65	90.7	2.37	1.44	4.78	0.81	5.02	29.9	1.02	2.78	0.4	2.63	0.39	7.42475	5.55133	3.98197	1.27751	0.933782
YB1324	91.2767	29.7383	Dacite	174.6	65.59	0.62	13.88	4.39	0.13	1.43	4.77	0.56	2.8	0.15	6.1	100.42	39.2693	3.36	1.09742	76.7	537	5.81	1.61	7.66	0.5	19.3	40.7	4.71	5.06	101	22.2	5.62	187	4.86	1.43	5.47	0.98	6.21	38.8	1.33	3.82	0.59	4.09	0.61	2.60309	4.71883	3.38481	1.01621	0.788493
YB1326	91.4383	29.735	Dacite	183.3	64.45	0.53	15.82	3.61	0.08	1.16	3.04	3.28	3.2	0.14	4.39	99.69	38.9447	6.48	1.09818	116	387	7.93	2.17	11.1	0.74	23.6	45	3.91	5.07	126	19.4	4.13	230	5.32	1.04	3.84	0.64	4.01	25.6	0.85	2.55	0.41	2.73	0.44	4.92188	8.64469	6.20083	0.983098	0.798392
YB1327	91.4383	29.735	Rhyolite		72.22	0.42	13.07	2.5	0.08	0.83	1.8	4.95	1.71	0.11	2.44	100.13	39.7242	6.66	0.984361	49.2	424	8.12	2.19	10.4	0.74	24.6	46.3	10.9	5.14	214	19.2	3.96	199	4.93	0.89	3.67	0.61	3.87	24.6	0.83	2.5	0.39	2.83	0.44	8.69919	8.69258	6.23518	0.91525	0.713728
YB1328	91.4367	29.725	Dacite		65.55	0.78	17	4.84	0.06	0.54	1.12	2.64	3.47	0.06	2.95	99	18.1317	6.11	1.67512	91.6	554	6.54	1.92	12.2	0.79	25	51.6	11.2	6.57	140	27.8	6.6	224	5.66	1.62	5.96	0.96	6.07	35.1	1.29	4.1	0.66	4.49	0.71	3.9886	5.56793	3.99387	0.90481	0.789666
YB1330	91.385	29.6717	Dacite		63.73	0.49	14.11	4.12	0.09	1.97	4.19	2.33	3.25	0.13	5.42	99.82	48.696	5.58	0.941193	83.1	683	4.72	1.49	5.97	0.4	18	33.5	5.21	3.79	209	15	3.32	151	3.55	0.87	3.11	0.5	3.08	19.3	0.64	1.97	0.31	2.1	0.33	10.829	8.57143	6.14828	0.981627	0.827739
EGD-1	89.04	29.4	Granitediorite	176.2	64.3	0.47	15.2	1.94	0.09	1.73	4.01	3.06	1.91	0.12	3.81	99.32	63.9013	4.97	1.05477	38.81	354.72	3.93	0.97	6.01	0.58	14.2	27.48	10.95	3.05	268.97	12	2.23	117.76	3.44	0.88	2.16	0.36	2.04	12.03	0.44	1.29	0.23	1.41	0.21	22.3583	10.0709	7.22387	0.968336	1.22582
EGD-2	89.04	29.4	Granitediorite	176.2	65.6	0.45	15.07	2.13	0.12	1.69	3.78	3.66	1.36	0.12	2.5	99.33	61.1651	5.02	1.04784	24.84	276.91	3.77	0.89	5.26	0.54	12.28	24.04	22.18	2.75	307.2	11.07	2.19	117.7	3.4	0.88	2.2	0.39	2.14	12.92	0.47	1.34	0.24	1.43	0.21	23.7771	8.58741	6.15975	1.0016	1.22567
EGD-3	89.04	29.4	Granitediorite	176.2	64.44	0.46	14.87	1.79	0.11	1.72	3.6	3.52	1.54	0.12	3.44	99.34	65.6054	5.06	1.06069	27.43	315.7	3.82	0.81	5.88	0.63	13.87	27.08	102.18	3.09	313.85	12.33	2.34	126.33	3.61	0.93	2.41	0.41	2.28	13.49	0.49	1.44	0.25	1.56	0.23	23.2654	8.89103	6.37753	0.978195	1.19726
EGD-4	89.04	29.4	Granitediorite	176.2	64.56	0.44	14.84	1.45	0.1	1.73	3.67	3.54	1.78	0.12	3.89	99.39	70.3122	5.32	1.0277	40.74	373.14	4.78	1.47	6.16	0.68	10.68	20.57	103.14	2.35	206.84	9.47	1.85	125.6	3.76	0.71	1.85	0.32	1.81	11.28	0.39	1.16	0.21	1.31	0.19	18.3369	8.15267	5.84791	0.924746	1.1733
EGD-5	89.04	29.4	Granitediorite	176.2	64.24	0.48	14.83	1.37	0.1	1.87	3.74	3.48	1.77	0.12	3.93	99.43	73.0424	5.25	1.02573	37.22	361.79	4.33	1.36	6.9	0.72	12.21	24.12	14.08	2.74	187.52	11.02	2.12	133.71	3.96	0.8	2.14	0.37	2.15	13.34	0.49	1.46	0.27	1.63	0.24	14.057	7.4908	5.37315	0.882808	1.14826
EGP-1	89.26	29.39	Granite porphyry	191.9	74.15	0.26	13.41	0.14	0.06	0.51	1.21	4.68	2.46	0.06	0.86	99.51	87.8512	7.14	1.0666	42.87	542.38	5.52	1.19	8.21	0.84	16.85	31.15	14.64	3.42	157.76	12.66	2.35	166.84	4.85	0.82	2.41	0.44	2.47	15.65	0.55	1.58	0.29	1.76	0.26	10.0805	9.57386	6.86733	0.93929	1.0534
EGP-2	89.26	29.39	Granite porphyry	191.9	73.52	0.26	12.66	0.08	0.06	0.5	1.24	4.62	2.09	0.07	2.08	99.39	92.541	6.71	1.04394	33.24	487.08	5.2	1.18	8.18	0.82	16.12	29.71	11.38	3.22	157.31	12.04	2.17	167.56	4.82	0.77	2.2	0.39	2.25	14.56	0.51	1.52	0.28	1.7	0.24	10.8043	9.48235	6.80169	0.885827	1.07739
EGP-3	89.26	29.39	Granite porphyry	191.9	73.06	0.27	13.29	0.05	0.07	0.58	1.5	4.62	2.01	0.07	1.42	99.4	95.838	6.63	1.06202	33.92	470.19	5.48	1.21	8.05	0.81	17.21	31.94	12.58	3.44	160.3	12.84	2.34	169.19	4.8	0.74	2.35	0.42	2.42	15.03	0.53	1.59	0.29	1.74	0.25	10.6653	9.8908	7.09467	0.930853	0.964747
EGP-4	89.26	29.39	Granite porphyry	191.9	71.15	0.28	14.45	0.3	0.07	0.65	2.11	4.1	2.52	0.06	1.79	99.53	81.1355	6.62	1.0846	52.45	557.47	6.27	1.33	8.87	0.93	18.24	33.76	10.28	3.66	182.83	13.51	2.41	185.28	5.25	0.75	2.37	0.43	2.37	15.67	0.55	1.63	0.31	1.86	0.27	11.6675	9.80645	7.03416	0.852807	0.959406
EGP-5	89.26	29.39	Granite porphyry	191.9	73.82	0.24	13.27	0.38	0.06	0.54	1.46	4.45	2.53	0.06	0.83	99.6	73.828	6.98	1.04278	40.39	554.94	5.47	1.23	8.32	0.83	17.72	32.06	12.07	3.49	165.87	13.08	2.32	159.88	4.62	0.88	2.37	0.42	2.32	14.72	0.52	1.54	0.29	1.67	0.25	11.2683	10.6108	7.61111	0.929794	1.14733
LM-1	89.56	29.41	Monzonite	159.4	60.02	0.77	15.4	3.87	0.07	1.35	2.61	3.66	4.24	0.18	1.18	99.44	40.9145	7.9	1.00156	132	610	14.9	3.38	19.2	1.4	34.2	68.1	12	7.83	266	28.8	5.68	436	10.6	1.19	5.57	0.85	4.88	27.8	1.07	3.13	0.46	3.21	0.49	9.56835	10.6542	7.64226	1.01749	0.646798
MGP-1	89.05	29.37	Granitediorite	172.4	65.91	0.28	16.17	1.97	0.1	0.91	3.74	3.56	2.92	0.15	1.71	99.3	47.834	6.48	1.021	68.22	1036	11.86	2.77	10.25	0.65	19.3	31.99	12.79	4.07	616	18.62	3.43	102.3	3.11	1.17	3.17	0.46	2.21	12.13	0.5	1.44	0.24	1.68	0.26	50.7832	11.4881	8.24041	0.880437	1.08476
MGP-10	89.05	29.37	Granitediorite	172.4	67.51	0.25	15.61	1.63	0.08	0.7	3.4	4.02	1.88	0.14	1.93	99.39	46.0183	5.9	1.05143	62.06	471	17.44	4.01	10.93	0.66	28.72	35.59	7.82	3.82	578	16.1	2.78	99.9	2.78	0.87	2.64	0.34	1.75	9.47	0.38	1.13	0.18	1.33	0.18	61.0348	21.594	15.4894	0.880646	0.98179
MGP-2	89.05	29.37	Granitediorite	172.4	67.18	0.25	15.23	1.38	0.09	0.75	2.86	3.52	3.15	0.13	2.37	99.39	51.8962	6.67	1.05629	74.77	794	16.48	4.58	13.5	0.71	20.1	29.59	8.05	3.45	479	15.12	2.77	99.3	3.16	0.99	2.55	0.37	1.73	10.19	0.41	1.18	0.22	1.54	0.26	47.0069	13.0519	9.36216	0.751866	1.1388
MGP-3	89.05	29.37	Granitediorite	172.4	65.95	0.27	16.07	1.9	0.09	0.67	3.83	3.99	2.34	0.15	2.48	99.34	41.1763	6.33	0.999415	61.36	759	9.09	2.13	9.31	0.64	22.28	33.38	8.64	4.07	637	17.94	3.3	96.7	2.72	1.11	3.07	0.44	2.09	11.39	0.46	1.32	0.22	1.51	0.23	55.9263	14.755	10.5837	0.92637	1.06616
MGP-4	89.05	29.37	Granitediorite	172.4	65.14	0.28	15.77	1.58	0.11	0.82	3.89	3.34	3.17	0.15	2.2	99.42	50.7443	6.51	0.984396	70.04	1126	12.64	2.85	9.71	0.61	18.6	30.15	10.6	3.71	612	16.91	3.14	104.6	3.29	1.07	2.9	0.41	1.99	10.95	0.43	1.27	0.21	1.53	0.22	55.8904	12.1569	8.72011	0.870516	1.08404
MGP-5	89.05	29.37	Granitediorite	172.4	64.99	0.28	16.07	1.95	0.11	0.93	3.77	3.34	3.07	0.17	2.37	99.34	48.6316	6.41	1.02403	72.01	1022	9.75	2.5	9.57	0.62	19.55	30.85	11.99	3.73	641	16.61	2.98	113.3	3.33	1.01	2.8	0.38	1.88	10.29	0.42	1.22	0.2	1.46	0.21	62.2935	13.3904	9.60494	0.861827	1.06895
MGP-6	89.05	29.37	Granitediorite	172.4	65.29	0.31	15.69	1.7	0.1	0.92	3.5	3.38	3.22	0.17	2.51	99.37	51.7902	6.6	1.01687	73.42	999	12.06	2.92	11.35	0.72	19.44	32.54	11.02	4.02	589	18.19	3.31	110.4	3.4	1.1	3.11	0.43	2.12	11.62	0.47	1.4	0.22	1.62	0.22	50.6885	12	8.60759	0.875863	1.04815
MGP-7	89.05	29.37	Granitediorite	172.4	67.27	0.24	15.45	1.7	0.08	0.81	3.28	4.04	1.86	0.14	2.76	99.38	48.6079	5.9	1.0554	63.54	466	16.84	4.34	11.16	0.72	22.89	32.52	8.37	3.77	552	16.46	2.92	99.3	2.85	0.89	2.71	0.36	1.88	10.21	0.4	1.21	0.18	1.46	0.2	54.0646	15.6781	11.2459	0.861827	0.967247
MGP-8	89.05	29.37	Granitediorite	172.4	66.42	0.26	16.2	1.97	0.1	0.79	3.8	4.28	1.84	0.15	1.66	99.3	44.3219	6.12	1.01508	60.69	474	11.45	2.51	9.1	0.56	19.4	30.83	8.71	3.77	635	16.98	3.05	97.4	2.59	1.01	2.82	0.37	1.86	10.24	0.4	1.2	0.18	1.39	0.18	62.0117	13.9568	10.0112	0.895598	1.05286
MGP-9	89.05	29.37	Granitediorite	172.4	66.17	0.28	16.25	1.9	0.1	0.8	3.95	3.79	2.63	0.16	1.6	99.4	45.5283	6.42	0.997934	66.96	845	10.26	2.43	10.21	0.67	23.26	35.2	9.01	4.18	602	18.85	3.27	110.3	3.19	1.11	3.06	0.41	2.12	11.47	0.45	1.32	0.2	1.58	0.21	52.4847	14.7215	10.5597	0.898036	1.07278
13GB-10	92.73	29.7	Andesite	188.8	60.14	0.79	15.45	7.01	0.21	1.9	7.47	2.62	1.37	0.14	2.27	105.812	34.9819	3.99	0.796269		221	11.8	2.15	12.3	0.94	29.6	55.1	28.3	6.25	660	23.1	4.51	121	3.74	1.22	4.39	0.69	4.09	22.6	0.84	2.28	0.34	2.24	0.35	29.2035	13.2143	9.4786	1.22205	0.838229
13GB-11	92.73	29.7	Calc-Alkaline volcanic	188.8	64.53	0.91	15.65	7.83	0.21	1.42	1.23	4.04	1.98	0.12	1.78	106.879	26.4705	6.02	1.41817		254	6.29	1.56	8.34	0.6	14.2	34.6	13.1	4.67	128	19.2	4.56	144	4.27	1.25	4.79	0.84	5.12	28.3	1.09	3.05	0.47	3.06	0.49	4.52297	4.64052	3.32865	1.11986	0.81768
13GB-14	92.73	29.7	Calc-Alkaline volcanic	188.8	62.58	0.78	15.66	6.68	0.16	2.18	4.94	2.76	2.48	0.15	1.8	106.318	39.3137	5.24	0.964906		563	11	2.25	11.6	0.89	26.5	49.9	15.8	5.8	112	21.5	4.23	91.5	3.1	1.1	4.13	0.66	3.95	21.7	0.83	2.3	0.35	2.24	0.35	5.16129	11.8304	8.48591	1.18022	0.804583
13GB-15	92.73	29.7	Calc-Alkaline volcanic	188.8	61.71	0.88	15.25	7.09	0.22	2.61	4.79	3.08	1.92	0.16	1.91	106.153	42.2215	5	0.960621		326	12.4	2.26	12.4	0.96	33.2	58.8	18.5	6.57	261	24.1	4.58	128	4	1.19	4.49	0.69	4.15	22.6	0.87	2.42	0.37	2.4	0.38	11.5487	13.8333	9.92264	1.15732	0.802259
13GB-9-1	92.73	29.7	Calc-Alkaline volcanic	188.8	61.87	0.8	15.81	6.58	0.16	2.04	6.38	2.25	2.11	0.15	1.93	106.134	38.0969	4.36	0.897688		318	11.4	2.27	12.5	0.95	31.5	57.8	18.8	6.53	374	24	4.64	101	3.39	1.2	4.46	0.71	4.21	23.1	0.89	2.43	0.37	2.35	0.37	16.1905	13.4043	9.61487	1.19903	0.806452
13GB-9-2	92.73	29.7	Calc-Alkaline volcanic	188.8	61.39	0.85	16.21	6.76	0.17	2.48	3.73	2.38	4.05	0.16	1.99	106.399	42.1379	6.43	1.07322		739	11.8	1.93	12.8	0.96	29.9	56.5	13.2	6.41	317	23.6	4.55	132	4	1.22	4.35	0.69	4.14	22.9	0.87	2.39	0.36	2.33	0.36	13.8428	12.8326	9.20483	1.18921	0.838365
T383	90.1	29.2	Granite	178	76.06	0.14	12.81	1.57778	0.03	0.43	1.84	3.13	3.65	0.04	0.26	101.418	35.107	6.78	1.02797	60.8	725	2.73	0.35	1.31	0.23	9.12	16.87	9.56	1.71	252	5.86	0.93	62.3	1.85	0.31	0.78	0.1	0.62	3.9	0.13	0.33	0.05	0.4	0.07	64.6154	22.8	16.3544	1.0374	1.11275
T384	90.1	29.2	Granite	178	73.38	0.19	14.17	2.11111	0.06	0.56	2.36	3.63	3.05	0.06	0.29	101.801	34.4934	6.68	1.04344	47.4	526	3.98	0.44	1.79	0.24	10.91	20.78	7.87	2.16	242	7.55	1.36	41.1	1.15	0.51	1.16	0.17	1	6.68	0.21	0.61	0.09	0.66	0.1	36.2275	16.5303	11.8572	1.01408	1.24135
T385	90.1	29.2	Granite	178	73.98	0.17	13.77	1.93333	0.05	0.48	1.78	3.48	3.66	0.05	0.39	101.519	33.0137	7.14	1.06424	70.6	448	6.94	1.08	3.09	0.54	15.68	31.31	9.24	3.32	202	11.77	2.24	71.8	2.25	0.54	1.94	0.32	2.04	14.1	0.45	1.5	0.24	1.8	0.29	14.3262	8.71111	6.24848	0.75853	0.79194
T387	90.1	29.2	Granite	178	73.94	0.17	13.98	1.7	0.05	0.44	2.12	4.08	2.83	0.05	0.37	101.292	33.9402	6.91	1.02459	57.9	296	4.46	1.42	2.85	0.44	9.53	18.1	8.02	1.9	182	6.66	1.35	62	1.93	0.42	1.3	0.22	1.48	10.4	0.34	1.07	0.17	1.38	0.24	17.5	6.9058	4.95353	0.717791	0.969247
110937	91.78	29.23	Tonalite	158.5	65.5	0.27	16.74	3.13	0.08	1.36	4.69	4.13	1.57	0.15	1.38	101.889	46.3093	5.7	0.982358	43.9	502	8.41	1.24	3.81	0.43	17.3	26.4	18.2	2.53	687	9.36	1.78	79.6	2.6	0.53	1.58	0.24	1.53	10.1	0.34	0.88	0.15	1.16	0.2	68.0198	14.9138	10.6977	0.882772	0.966186
08FW07	91.78	29.23	Tonalite	158.5	66.41	0.25	16.67	3.12	0.08	1.42	3.16	4.65	2.74	0.14	1.4	102.922	47.464	7.39	1.01777	58.5	1268	7.3	2.12	3.34	0.24	14.2	23.4	16.2	2.56	506	9.3	1.75	81.2	2.2	0.65	1.62	0.25	1.51	9.82	0.31	1	0.15	1.18	0.2	51.5275	12.0339	8.63191	0.856466	1.18021
08FW08	91.78	29.23	Tonalite	158.5	64.17	0.31	17.35	3.72	0.11	1.69	3.38	4.62	2.75	0.16	1.82	103.516	47.4187	7.37	1.03637	67	1181	7.6	1.56	4.23	0.28	21.1	32.5	19.3	3.46	703	12.2	2.13	98.7	2.53	0.75	2	0.31	1.87	11.97	0.38	1.13	0.18	1.3	0.23	58.7302	16.2308	11.6423	0.96275	1.11091
08FW09	91.78	29.23	Tonalite	158.5	64.99	0.26	17.29	3.42	0.11	1.36	4.55	3.82	2.71	0.14	1.68	103.484	44.1147	6.53	0.987286	79.3	1367	5.96	0.9	3.4	0.22	16.5	26.8	21.9	2.8	889	10.1	1.77	88.3	2.28	0.68	1.66	0.26	1.59	10.21	0.33	1	0.16	1.2	0.2	87.0715	13.75	9.86287	0.886811	1.21281
08FW10	91.78	29.23	Tonalite	158.5	65.02	0.27	17.05	3.36	0.09	1.32	3.71	4.57	2.64	0.15	1.62	102.898	43.8153	7.21	0.994716	67.9	1401	4.74	1.21	3.35	0.21	12.5	20.3	20	2.26	778	8.21	1.64	90.1	2.36	0.67	1.55	0.25	1.55	9.77	0.31	0.96	0.16	1.14	0.19	79.6315	10.9649	7.86513	0.910001	1.28473
08FW11	91.78	29.23	Tonalite	158.5	64.72	0.27	17.02	3.55	0.11	1.45	4.92	3.81	2.5	0.14	1.6	103.365	44.7758	6.31	0.948598	74	1744	6.57	1.3	3.47	0.22	13.2	21.9	21.7	2.43	885	9.09	1.8	77.4	2.08	0.7	1.88	0.3	1.91	12.2	0.37	1.18	0.2	1.43	0.23	72.541	9.23077	6.62123	0.893949	1.16334
09FW72	91.71	29.24	Andesite	158	57.21	0.53	15.96	0.21	6.24	0.13	5.13	6.9	3.28	0.34	3.68	99.59	55.1338	10.18	0.658017	16.8	167	9.17	2.49	3.42	0.3	27.1	44.9	9.46	4.94	653	17.8	3.7	74.4	1.85	1.04	3.37	0.51	2.61	18.2	0.68	1.72	0.27	1.83	0.29	35.8791	14.8087	10.6223	0.954563	0.900412
09FW73	91.71	29.24	Andesite	158	55.97	0.55	17.07	0.22	6.7	0.13	5.05	7.3	3.33	0.23	2.76	99.31	53.9805	10.63	0.687716	9.6	375	8.77	2.56	3.53	0.26	27.1	45	8.38	4.92	818	17.9	3.72	74	1.83	1.06	3.4	0.5	2.68	18.7	0.67	1.75	0.27	1.8	0.3	43.7433	15.0556	10.7993	0.9965	0.91121
09FW74	91.71	29.24	Andesite	158	59.06	0.47	15.75	0.19	6.19	0.11	4.09	7.59	3.12	0.1	2.66	99.33	53.472	10.71	0.675329	4.1	339	8.48	2.49	3.19	0.28	24.8	41.4	9.01	4.54	828	16.1	3.4	85	2.09	0.99	3.17	0.46	2.46	16.7	0.61	1.63	0.26	1.7	0.27	49.5808	14.5882	10.4641	0.968504	0.921913
09FW75	91.71	29.24	Andesite	158	55.97	0.51	16.47	0.2	6.41	0.13	4.41	8.74	2.98	0.11	2.88	98.81	56.3374	11.72	0.642235	4.52	50.2	8.76	2.43	3.41	0.31	27	44.3	9.02	4.89	870	17.2	3.54	73.5	1.82	1.07	3.32	0.49	2.56	18	0.64	1.68	0.27	1.74	0.27	48.3333	15.5172	11.1305	0.984704	0.954194
09FW76	91.71	29.24	Andesite	158	55.85	0.53	16.65	0.22	6.52	0.12	4.81	7.59	3.47	0.18	3.02	98.96	51.9868	11.06	0.665649	8.18	67.4	9.38	2.57	3.54	0.3	28.6	46.8	7.43	5.16	784	18.1	3.76	79.1	1.99	1.1	3.45	0.51	2.72	18.9	0.68	1.83	0.29	1.86	0.29	41.4815	15.3763	11.0294	0.978749	0.933712
09FW77	91.71	29.24	Andesite	158	55.64	0.55	17.16	0.22	6.54	0.13	5.03	7.51	3.58	0.34	2.64	99.33	53.9805	11.09	0.675547	14.8	91.6	9.65	2.77	3.65	0.33	28	47.8	8.26	5.16	739	18.3	3.84	94.6	2.33	1.11	3.64	0.52	2.81	19.1	0.71	1.87	0.29	1.91	0.3	38.6911	14.6597	10.5154	0.984664	0.907675
09FW78	91.71	29.24	Andesite	158	54.95	0.55	17.35	0.22	6.58	0.13	5.16	7.18	3.53	0.59	2.84	99.08	53.9805	10.71	0.692857	24.9	135	9.37	2.65	3.68	0.32	28.9	48.3	7.54	5.24	741	18.2	3.83	92.9	2.2	1.14	3.54	0.53	2.7	19.5	0.69	1.87	0.3	1.88	0.31	38	15.3723	11.0266	0.961216	0.946515
09FW79	91.71	29.24	Andesite	158	57.58	0.5	16.19	0.2	6.27	0.13	4.48	7.67	3.25	0.27	3.34	99.88	56.3374	10.92	0.666119	12.7	82.5	8.78	2.54	3.28	0.28	26.1	43.4	8.48	4.69	701	16.8	3.5	76.7	1.98	1.02	3.27	0.48	2.49	17.2	0.64	1.7	0.26	1.74	0.28	40.7558	15	10.7595	0.957779	0.921756
09FW80	91.71	29.24	Andesite	158	55.28	0.53	16.75	0.21	6.57	0.13	4.73	8.79	3.22	0.13	3.26	99.6	55.1338	12.01	0.630402	5.06	446	9.03	2.6	3.44	0.3	26.9	45.8	9.82	4.95	826	17.9	3.84	86.5	2.1	1.11	3.42	0.51	2.79	18.6	0.68	1.8	0.27	1.81	0.3	44.4086	14.8619	10.6604	1.03167	0.936414
09FW81	91.5	29.24	Hornblendite	157.4	45.49	0.63	8.79	10.78	0.19	18.59	10.56	1.02	0.45	0.1	2.18	109.076	77.392	1.47	0.410735	3.25	194	0.73	0.21	1.28	0.15	5.06	11.7	2.39	1.69	156	8.02	2.15	31.8	1.03	0.75	2.42	0.38	2.43	13.5	0.52	1.34	0.2	1.23	0.18	11.5556	4.11382	2.95084	1.32226	1.00521
09FW82	91.5	29.24	Hornblendite	157.4	45.23	0.66	10.57	10.63	0.23	17.06	10.16	1.12	0.73	0.12	2.64	109.271	76.1097	1.85	0.49999	17.3	210	0.94	0.22	2	0.23	6.87	15.9	4.69	2.2	296	10.26	2.61	39.6	1.26	0.95	2.87	0.43	2.82	16	0.61	1.6	0.23	1.51	0.24	18.5	4.54967	3.26348	1.24993	1.06117
09FW83	91.5	29.24	Hornblendite	157.4	45.18	0.75	9.58	11.18	0.19	17.07	10.91	1.08	0.51	0.06	2.12	109.253	75.1914	1.59	0.431493	5.13	2606	0.84	0.25	0.87	0.14	4.22	9	4.85	1.31	267	6.56	1.95	29.2	0.96	0.96	2.48	0.36	2.31	12.3	0.49	1.29	0.18	1.1	0.17	21.7073	3.83636	2.75182	1.40551	1.3346
09FW84	91.68	29.24	Hornblendite	158	44.32	0.61	10.56	10.86	0.17	17.55	10.81	1.06	0.55	0.05	2.42	98.95	76.2352	1.61	0.479339	6.99	896	0.83	0.24	0.85	0.17	3.83	8.2	3.6	1.19	290	6.14	1.82	26.8	0.9	0.74	2.25	0.33	2.1	11.4	0.46	1.16	0.16	0.99	0.15	25.4386	3.86869	2.77501	1.41971	1.11797
09FW85	91.5	29.24	Hornblendite	157.4	45.67	0.97	15.06	9.41	0.19	11.93	10.25	1.15	2.35	0.05	2.08	107.991	71.5639	3.5	0.651621	88	496	0.31	0.1	1.78	0.19	5.51	13.2	3.71	1.93	501	9.63	2.66	35.5	1.17	1	3.1	0.47	3.03	17	0.66	1.67	0.24	1.53	0.23	29.4706	3.60131	2.58322	1.32546	1.06464
09FW86	91.5	29.24	Gabbro	155.9	44.74	1.2	15.27	9.18	0.16	11.9	10.87	1.18	2.04	0.08	2.24	107.53	72.0141	3.22	0.637476	77	507	0.72	0.22	1.82	0.25	6.29	14.3	3.9	2.05	501	10.13	2.87	41.4	1.39	1.07	3.48	0.53	3.3	18.2	0.73	1.81	0.26	1.63	0.24	27.5275	3.8589	2.76798	1.35501	1.03509
09FW87	91.5	29.24	Gabbro	155.9	43.32	0.82	14.65	10.52	0.17	13.4	11.85	1.27	1.05	0.05	1.78	108.81	71.6593	2.32	0.590425	24.5	364	0.5	0.15	1.15	0.17	4.6	10.9	3.41	1.6	561	7.98	2.28	33.6	1.1	0.88	2.71	0.42	2.71	13.9	0.56	1.48	0.21	1.28	0.19	40.3597	3.59375	2.5778	1.41702	1.08232
09FW88	91.5	29.24	Gabbro	155.9	43.74	0.91	11.88	10.97	0.17	16.16	10.96	1.3	0.78	0.06	1.94	109.279	74.5172	2.08	0.517693	12.1	1324	0.67	0.19	1.18	0.17	5.02	11.1	4.76	1.7	342	8.58	2.45	35.2	1.18	1.03	2.98	0.46	2.92	15.2	0.62	1.58	0.22	1.36	0.2	22.5	3.69118	2.64768	1.43701	1.16539
09FW90	91.5	29.24	Gabbro	155.9	44.52	1.26	14.5	10.22	0.2	12.27	10.96	1.37	1.6	0.09	2.18	108.798	70.4425	2.97	0.605355	50.9	489	0.7	0.2	2.27	0.32	7.24	16.6	6.38	2.43	525	11.97	3.4	44	1.51	1.27	3.88	0.6	3.83	20.3	0.81	2.08	0.29	1.86	0.29	25.8621	3.89247	2.79207	1.37816	1.06899
09FW91	91.5	29.24	Gabbro	157.5	45.78	0.98	16.86	10.66	0.19	8.49	10.72	1.91	1.64	0.12	2.24	109.526	61.2549	3.55	0.68964	43.9	694	1.02	0.32	2.29	0.29	7.98	18.2	4.37	2.62	566	13.02	3.39	42.2	1.36	1.27	4.11	0.59	3.76	21.1	0.85	2.19	0.31	1.97	0.29	26.8246	4.05076	2.90561	1.27743	1.04018
09FW92	91.5	29.24	Gabbro	157.5	44.8	0.9	17.56	10.77	0.18	8.08	11.17	1.69	1.8	0.13	2.38	109.486	59.8274	3.49	0.700191	44	937	0.8	0.23	2.1	0.25	8.55	18.3	4.15	2.58	607	12.41	3.35	35.1	1.23	1.26	3.83	0.56	3.64	19.6	0.8	2.06	0.3	1.9	0.28	30.9694	4.5	3.22785	1.28222	1.07541
09FW93	91.5	29.24	Gabbro	157.5	45.66	0.88	17.14	10.6	0.17	8.09	11.55	2.05	1.17	0.11	2.22	109.511	60.2388	3.22	0.667454	23.6	440	1.08	0.37	2.5	0.28	9.12	19.6	5.06	2.68	635	12.52	3.27	43.3	1.42	1.16	3.76	0.56	3.58	20.1	0.77	2.03	0.29	1.84	0.28	31.592	4.95652	3.55531	1.30221	1.01138
09FW94	91.5	29.24	Gabbro	157.5	44.13	1.02	17.31	10.78	0.19	8.14	11.83	1.48	1.76	0.24	2.32	109.236	59.9828	3.24	0.668543	43.5	570	1.26	0.48	2.21	0.23	7.48	17	4.79	2.53	604	13.07	3.67	38.8	1.26	1.34	4.12	0.65	4.17	22.2	0.87	2.28	0.32	1.99	0.3	27.2072	3.75879	2.69618	1.40248	1.05353
09FW95	91.5	29.24	Ganodiorite	155.5	64.46	0.24	18.38	2.26	0.07	1.1	3.53	5.44	1.91	0.15	1.6	101.229	49.14	7.35	1.05318	24.6	1401	4.89	0.99	5.46	0.4	14	19	19.1	2.02	968	7.29	1.33	117.9	3.67	0.57	1.07	0.14	0.89	5.46	0.17	0.47	0.09	0.62	0.12	177.289	22.5806	16.1971	0.960757	1.46077
09FW96	91.5	29.24	Ganodiorite	155.5	68.67	0.17	17.33	1.44	0.07	0.65	2.76	4.98	2.28	0.09	1.28	101.05	47.2583	7.26	1.10424	54	1819	9.57	2.04	5.97	0.47	20.9	30.6	29.3	2.89	1001	10.1	1.74	106.5	3.43	0.64	1.31	0.18	1.1	7.7	0.23	0.62	0.12	0.92	0.17	130	22.7174	16.2952	0.80024	1.29597
09FW97	91.5	29.24	Ganodiorite	155.5	68.71	0.17	17.14	1.49	0.07	0.69	2.24	5.4	2.16	0.09	1.18	100.716	47.8965	7.56	1.1197	61.1	1768	10.08	2.02	6.02	0.39	22.7	33.5	27.4	3.04	844	10.8	1.84	114	3.5	0.64	1.4	0.19	1.14	8.17	0.24	0.62	0.12	0.87	0.16	103.305	26.092	18.7157	0.877002	1.21908
ZD01	91.78	29.23	Tonalite	158.5	63.68	0.31	17.18	3.64	0.11	1.42	4.74	3.59	2.62	0.15	1.7	102.496	43.6427	6.21	0.98834	69.8	1423	7.64	1.77	3.8	0.37	16.9	27	20.5	2.67	894	10.3	2.17	44.6	1.89	0.71	1.92	0.29	1.86	12.3	0.4	1.07	0.19	1.35	0.23	72.6829	12.5185	8.97953	0.922135	1.06341
ZD02	91.78	29.23	Tonalite	158.5	63.92	0.31	16.99	3.55	0.1	1.39	4.77	3.73	2.19	0.15	1.66	102.033	43.7333	5.92	0.98773	62.8	2390	5.61	1.42	3.09	0.32	14.2	22.7	17.4	2.27	860	8.84	1.87	87.1	2.8	0.77	1.67	0.26	1.7	11.1	0.37	0.93	0.18	1.24	0.22	77.4775	11.4516	8.21424	0.917577	1.3321
ZD03	91.78	29.23	Tonalite	158.5	63.66	0.31	17.33	3.74	0.12	1.43	4.56	3.9	2.2	0.15	1.86	102.707	43.1493	6.1	1.01291	57.8	1797	6.57	1.18	3.45	0.28	17.8	28	20.3	2.77	909	10.4	2.11	60.5	1.93	0.74	1.82	0.29	1.84	11.8	0.38	1.08	0.17	1.19	0.2	77.0339	14.958	10.7294	1.03487	1.15446
ZD04	91.78	29.23	Tonalite	158.5	61.87	0.35	17.59	4.34	0.11	1.92	5.73	3.77	1.95	0.17	1.58	103.387	46.7571	5.72	0.937883	44.1	854	7.07	1.6	3.48	0.33	11.6	18.9	18	2.04	899	8.24	1.85	71.6	2.44	0.67	1.7	0.29	1.8	12.1	0.4	1.04	0.19	1.33	0.22	74.2975	8.7218	6.25615	0.905808	1.15502
ZD06	91.78	29.23	Tonalite	158.5	64.35	0.28	17.29	3.43	0.11	1.29	4.33	4.08	2.59	0.15	1.58	102.641	42.7449	6.67	0.993138	43	925	7.47	1.68	4.15	0.42	15	22.5	20	2.39	806	9.45	2.05	43.8	1.9	0.67	1.84	0.29	1.91	12.2	0.42	1.1	0.2	1.38	0.23	66.0656	10.8696	7.79673	0.926338	1.05466
ZD23	91.71	29.24	Basalt	159.6	48.19	0.75	13.5	10.21	0.2	9.87	10.74	2.1	1.16	0.15	2	108.429	65.7412	3.26	0.556112	21	166	2.32	0.63	1.41	0.19	9.3	18.5	4.82	2.39	352	10.8	2.85	36.4	1.11	0.91	3.08	0.48	3.02	17.1	0.64	1.8	0.26	1.7	0.24	20.5848	5.47059	3.92405	1.18898	0.939004
ZD24	91.71	29.24	Basaltic andesite	159.6	50.48	0.7	17.46	8.88	0.16	4.85	7.9	2.95	2.07	0.2	3.48	107.352	52.0196	5.02	0.812521	47.3	1397	4.33	1.19	2.34	0.23	14.8	26.8	9.42	3.24	506	13.7	3.19	58.2	1.54	1.14	3.44	0.52	3.32	20.3	0.74	2.14	0.32	2.18	0.32	24.9261	6.78899	4.86974	1.01929	1.05209
ZD26	91.7	29.23	Basalt	159.6	47.52	1.04	16.83	10.14	0.22	4.95	8.69	1.49	4.32	0.36	4.04	108.973	49.2138	5.81	0.732785	99.4	465	3.21	1.33	4.78	0.43	13.4	27.6	8.83	3.53	471	15.6	3.93	78.5	2.11	1.21	4.26	0.67	4.2	24.1	0.9	2.53	0.37	2.41	0.35	19.5436	5.56017	3.9883	1.1664	0.904082
ZD27	91.7	29.24	Basalt	159.6	48.48	0.79	18.1	9.09	0.19	3.81	10.35	2.59	1.78	0.42	3.38	107.367	45.4155	4.37	0.722721	37.7	340	3.32	1.06	5.87	0.52	16.3	32.4	10.36	4.01	639	16.9	3.99	86.4	2.23	1.33	4.11	0.64	3.95	23.7	0.86	2.46	0.37	2.44	0.36	26.962	6.68033	4.7918	1.08348	1.00408
ZD29	91.7	29.24	Basaltic andesite	159.6	50.18	0.86	17.7	9.22	0.16	4.41	8.05	1.71	3.98	0.4	3.28	108.471	48.704	5.69	0.812133	116	486	2.88	0.79	5.2	0.48	14.7	30.3	9.45	3.82	460	16.6	4.04	77.7	2.01	1.32	4.22	0.66	4.09	24	0.87	2.47	0.37	2.52	0.36	19.1667	5.83333	4.18425	1.08627	0.977351
ZD30	91.7	29.24	Basalt	159.6	47.27	0.83	17.69	11.14	0.17	4.34	9.67	2.44	2.31	0.57	3.22	109.921	43.6097	4.75	0.732991	61.1	414	4.1	1	6.13	0.4	22.7	46.2	13.98	5.58	612	22.6	5	105.7	2.67	1.65	4.94	0.73	4.46	25.9	0.95	2.69	0.41	2.76	0.41	23.6293	8.22464	5.89953	1.08154	1.01498
ZD33	91.72	29.24	Basalt	159.6	45.93	0.98	17.09	10.7	0.17	5.62	10.55	1.74	2.67	0.39	3.14	108.881	51.0433	4.41	0.68426	57.8	407	2.37	0.82	4.65	0.35	14.3	29.8	8.81	3.79	629	16.4	3.99	66.6	1.89	1.35	4.27	0.64	4.06	23.6	0.88	2.43	0.35	2.38	0.36	26.6525	6.0084	4.30983	1.14173	0.999901
ZD34	91.72	29.24	Basalt	159.6	45.95	0.79	16.99	10.89	0.19	6.59	9.53	2.02	2.57	0.27	3.4	109.288	54.5711	4.59	0.723898	59.8	338	1.54	0.54	3.04	0.26	9	19.2	3.83	2.52	388	11.3	3.03	48.8	1.41	1.03	3.37	0.53	3.44	20.2	0.75	2.1	0.31	2.07	0.31	19.2079	4.34783	3.11869	1.11225	0.985427
ZD35	91.74	29.24	Basalt	159.6	46.56	0.89	16.91	11.04	0.18	6.57	9.27	2.9	1.46	0.27	3.26	109.545	54.1563	4.36	0.727629	37.7	247	1.68	0.58	2.97	0.27	8	17.1	4.48	2.3	425	10.7	2.94	48.3	1.44	1.09	3.42	0.53	3.47	20.1	0.75	2.04	0.3	2.01	0.3	21.1443	3.9801	2.85492	1.15544	1.0509
ZD37	91.75	29.24	Basalt	159.6	43.35	0.81	14.07	8.74	0.14	9.85	13.61	1.09	1.48	0.23	5.83	107.418	69.1088	2.57	0.499134	45.2	574	4.55	0.95	4.87	0.42	13.1	29.6	10.7	3.97	465	17.9	4.63	57.2	1.67	1.31	4.48	0.61	3.52	18.4	0.7	1.81	0.25	1.6	0.23	25.2717	8.1875	5.87289	1.47244	0.879357
ZD39	91.76	29.22	Basaltic andesite	159.6	51.78	0.81	16.6	9.26	0.2	4.5	7.43	3.79	2.91	0.39	1.4	107.63	49.1007	6.7	0.724068	56.4	815	5.45	1.5	5.86	0.46	19.5	38.3	5.54	4.6	433	18.8	4.15	84.5	2.19	1.34	4.14	0.62	3.81	22	0.79	2.22	0.31	2.23	0.32	19.6818	8.74439	6.27235	1.1435	0.988335
ZD58	91.62	29.25	Basalt	159.6	47.48	0.74	14.52	10.91	0.19	8.31	9.5	2.37	1.94	0.2	3.12	109.439	60.191	4.31	0.62297	40	354	1.25	0.37	1.59	0.2	6.2	13	3.95	1.76	238	8.3	2.43	40.6	1.23	0.87	2.85	0.47	3.1	18.4	0.69	1.94	0.29	1.91	0.29	12.9348	3.24607	2.32841	1.08628	1.01069
ZD59	91.63	29.25	Basalt	159.6	46.26	0.92	16.35	10.51	0.16	5.87	11.48	3.01	0.76	0.26	3.48	108.794	52.5771	3.77	0.612667	15.7	243	1.92	0.52	2.42	0.27	8.7	18.5	6.14	2.45	415	11.2	3.04	57.5	1.64	1.06	3.37	0.55	3.47	20.2	0.75	2.08	0.32	2.09	0.31	20.5446	4.16268	2.98589	1.11122	1.01246
ZD60	91.63	29.25	Basaltic andesite	159.6	53.43	0.7	17.69	7.92	0.21	3.77	6.49	2.68	3.37	0.38	2.46	106.419	48.5837	6.05	0.88953	120.4	735	5.55	1.36	5.81	0.45	21.9	42.6	8.51	5.08	367	20.5	4.44	118	3.1	1.42	4.34	0.66	4.19	25.4	0.9	2.63	0.4	2.83	0.45	14.4488	7.73852	5.55083	0.99093	0.988953
ZD61	91.66	29.25	Basaltic andesite	159.6	51.8	0.63	17.86	8.58	0.24	4.4	5.41	3.72	3.35	0.43	2.68	107.037	50.4455	7.07	0.910805	73.7	727	3.68	1.09	3.29	0.26	16.2	30.9	6.46	3.76	645	15.9	3.8	81.4	2.23	1.31	4.28	0.67	4.22	26.4	0.94	2.76	0.42	2.88	0.46	24.4318	5.625	4.03481	0.980698	0.993073
ZD62	91.67	29.25	Basalt	159.6	46.83	0.8	17.81	10.05	0.14	5.45	9.32	2.79	2.09	0.27	3.96	108.814	51.8415	4.88	0.747265	42.5	387	2.29	0.56	2.4	0.21	10.7	22	7.2	2.84	441	12.4	3.14	59	1.67	1.1	3.57	0.57	3.55	21	0.78	2.19	0.32	2.16	0.33	21	4.9537	3.55329	1.09999	1.00442
ZD63	91.7	29.23	Basalt	159.6	47.86	0.74	16.66	9.17	0.18	7.66	9.42	2.43	2.23	0.2	3.03	108.136	62.3804	4.66	0.706669	66	707	2.76	0.74	1.62	0.16	12.9	25.4	10.9	3.24	702	14.2	3.39	48.1	1.41	1.2	3.66	0.54	3.38	19.9	0.73	2.06	0.31	2.05	0.32	35.2764	6.29268	4.51374	1.10351	1.04151
ZD64	91.763	29.22	Basalt	159.6	46.75	0.99	18.57	10.18	0.18	5.71	8.29	2.29	3.04	0.31	2.94	108.679	52.6835	5.33	0.837778	23.4	337	1.64	0.86	2.75	0.2	7.2	18.5	8.69	2.35	356	10.7	2.89	71.5	2.03	0.98	3.09	0.49	3.13	13.3	0.67	1.88	0.28	1.89	0.28	26.7669	3.80952	2.73257	1.1084	1.00259
BD01	91.2667	29.6167	Basalt		42.3	1.01	17.77	12.03	0.27	10.51	7.5	2.65	0.04	0.4	5.28	110.996	63.4269	2.69	0.983736	0.5	64.1	1.2	0.3	5.1	0.2	15.1	32.7	6.8	4.3	442	19.3	4.4	67.6	2.3	1.4	4.3	0.7	4.3	22.2	0.9	2.5	0.3	2.3	0.3	19.9099	6.56522	4.70923	1.25128	0.983991
BD04-1	91.2667	29.6167	Basalt		47.56	1.06	17.94	11.52	0.24	7.39	5.11	4.92	0.14	0.41	3.82	110.803	56.0131	5.06	1.02201	6.5	120	3.9	0.6	6.7	0.3	15.9	32.7	8.9	4.2	538	19.2	4.5	109	2.6	1.5	4.2	0.7	4.1	22.5	0.8	2.4	0.3	2.2	0.3	23.9111	7.22727	5.18412	1.24732	1.05483
BD05	91.2667	29.6167	Basalt		46.38	0.71	20.29	12.79	0.24	3.13	10.85	1.32	2.54	0.2	2.03	112.226	32.6957	3.86	0.821781	89.1	404	2.1	0.6	6.3	0.3	20	36.5	35.2	4.8	709	20.3	5	70.8	2.4	1.9	4.7	0.7	4.6	25.1	0.9	2.6	0.3	2.3	0.4	28.247	8.69565	6.23739	1.33858	1.19824
BD08	91.2667	29.6167	Basalt		48.52	0.8	15.98	9.86	0.16	7.96	11.53	3.07	0.12	0.42	2.13	109.743	61.5761	3.19	0.610345	1.8	61.7	2.3	0.6	5.6	0.2	21.9	44.9	7.2	5.5	903	23.6	4.9	87.7	2.4	1.5	4.1	0.6	3.7	19.1	0.7	2.1	0.3	1.9	0.3	47.2775	11.5263	8.26782	1.30336	1.02312
BD09	91.3833	29.6667	Andesite		57.44	0.79	15.67	9.67	0.15	2.17	9.76	1.19	0.42	0.14	2.48	108.756	30.8178	1.61	0.776103	9.9	128	3.1	0.7	6.7	0.4	20.4	38.9	25.1	4.6	689	19.3	4.1	107	2.7	1.3	3.8	0.6	3.6	20.4	0.8	2.2	0.3	2.2	0.3	33.7745	9.27273	6.65132	1.0952	1.00689
BD13	91.2667	29.6167	Basalt		48.66	0.73	16.66	9.85	0.17	6.41	10.54	3.53	0.41	0.29	2.59	108.985	56.3662	3.94	0.654613	6.2	579	1.6	0.5	3.2	0.2	12.8	27.1	12.4	3.5	515	15.5	3.7	80.6	2.3	1.3	3.6	0.6	3.8	20.5	0.8	2.2	0.3	2.1	0.3	25.122	6.09524	4.37211	1.2111	1.08897
BD16	91.2667	29.6167	Basalt		47.4	0.78	16.87	9.76	0.17	5.86	12.31	3.27	0.25	0.3	2.72	108.739	54.3764	3.52	0.600939	3.8	234	1.5	0.4	4.3	0.2	12.8	27.3	22.8	3.5	831	15.5	3.6	75.3	2.2	1.3	3.6	0.6	3.7	20.1	0.8	2.3	0.3	2.1	0.3	41.3433	6.09524	4.37211	1.17923	1.10399
BD19	91.2667	29.6167	Basalt		49.56	0.87	18.02	9.7	0.29	6.55	5.62	4.35	0.05	0.43	4.28	108.732	57.2728	4.4	1.03283	0.8	61.8	1.6	0.4	6.1	0.3	18.4	39.8	32.9	5.1	556	21.2	4.9	95.5	2.8	2	4.8	0.8	4.7	25.1	1	2.8	0.4	2.5	0.4	22.1514	7.36	5.27932	1.25827	1.26077
BD21	91.2667	29.6167	Basalt		40.9	0.84	15.62	9.61	0.19	7.84	13.17	2.92	0.51	0.16	9.17	109.892	61.824	3.43	0.532279	9	659	1.9	0.8	7.2	0.2	12.7	26.3	42.3	3.4	459	14.8	3.4	83.3	2.3	1.2	3.5	0.6	3.5	19.05	0.7	2.1	0.3	1.9	0.3	24.0945	6.68421	4.79458	1.23291	1.06349
BD22	91.2667	29.6167	Basalt		48.68	1.25	18.39	12.22	0.21	4.96	2.25	5.83	0.03	0.56	5.28	110.931	44.6204	5.86	1.34018	1.1	60.5	1.4	0.4	9.7	0.5	19.3	43.1	3.9	5.5	101	24.2	5.4	129	3.2	1.6	5.3	0.9	5.1	27.9	1	3.2	0.4	2.9	0.4	3.62007	6.65517	4.77375	1.17703	0.914342
DZ01-2	91.3833	29.6667	Dacite	174.2	65.98	0.59	15.86	3.88	0.11	1.25	2.63	5.91	1.65	0.11	1.47	103.011	39.0064	7.56	0.972786	26	723	4.7	1	11.4	0.5	26.5	52.3	56.7	6.3	445	24.6	5.3	186	5	1.5	4.8	0.8	5	29	1.1	3.3	0.5	3.4	0.5	15.3448	7.79412	5.59072	0.984252	0.909194
DZ02-1	91.3833	29.6667	Dacite	174.2	61.78	0.6	19.79	3.15	0.1	1.03	1.57	6.34	3.12	0.17	1.97	102.519	39.3602	9.46	1.18677	80.9	693	6.6	2.2	10.3	0.8	31.4	57.7	18.3	6.2	248	23.6	4.7	270	6.5	1.3	4.4	0.7	4.1	24.7	0.9	2.9	0.4	3.2	0.5	10.0405	9.8125	7.0385	0.85753	0.87396
DZ03-1	91.3833	29.6667	Dacite	174.2	65.78	0.49	18.56	2.09	0.04	1	0.85	3.28	4.65	0.15	2.75	101.572	48.7124	7.93	1.54795	149	883	11	1.8	9.4	0.7	26.1	48.5	8.9	5.3	149	20.5	4.1	231	5.6	1.1	3.8	0.6	3.6	21.4	0.8	2.5	0.4	2.6	0.4	6.96262	10.0385	7.20058	0.926711	0.851986
DZ03-2	91.3833	29.6667	Dacite	174.2	64.14	0.53	15.26	4.46	0.1	1.92	4.32	3.17	2.4	0.1	3.82	104.336	46.0787	5.57	0.972719	68.4	654	5.1	1.2	11.1	0.5	22.3	42.3	28.3	4.8	400	18.2	3.9	187	5	1	3.3	0.6	3.7	20.9	0.7	2.3	0.4	2.3	0.4	19.1388	9.69565	6.95469	1.07669	0.852186
DZ03-3	91.3833	29.6667	Dacite	174.2	66.52	0.47	14.73	4.02	0.1	1.41	3.34	4.13	2.62	0.14	1.94	103.122	41.0465	6.75	0.936959	66.2	661	7.9	1.9	7.5	0.5	21.5	39.1	15.4	4.4	355	17.1	3.5	208	5	1.1	3.3	0.6	3.3	19.7	0.7	2.2	0.3	2.3	0.4	18.0203	9.34783	6.70519	0.960288	0.989522
DZ04-1	91.3833	29.6667	Dacite	174.2	63.3	0.59	15.3	4.68	0.11	1.67	3.52	2.3	3.52	0.17	4.23	103.701	41.4638	5.82	1.0917	95.7	735	4.8	1.4	7.3	0.5	20.3	37.1	13	4.2	173	16.6	3.5	183	4.4	1.2	3.4	0.6	3.3	19.7	0.7	2.2	0.3	2.3	0.4	8.78173	8.82609	6.33095	0.960288	1.06349
DZ05-1	91.3833	29.6667	Dacite	174.2	68.92	0.4	14.94	3.07	0.09	1.09	2.67	3.98	2.82	0.11	1.68	102.598	41.3419	6.8	1.03241	80.2	798	6.8	1.6	9	0.5	23.3	43	27.1	4.8	305	17.6	3.5	192	5.1	1	3.1	0.6	3.5	20	0.7	2.3	0.3	2.3	0.4	15.25	10.1304	7.26656	1.01849	0.92813
DZ07-2	91.3833	29.6667	Basalt		47.4	0.66	14.3	7.86	0.14	7.45	8.38	2.14	1.04	0.13	11.07	107.925	65.296	3.18	0.718134	50.2	196	1.4	0.5	3.4	0.1	7.2	15.8	20	2.1	397	9	2.2	77.1	2.1	0.8	2.4	0.4	2.6	13.9	0.5	1.6	0.2	1.5	0.2	28.5612	4.8	3.44304	1.1601	1.06438
DZ07-3	91.3833	29.6667	Dacite	174.2	67.12	0.53	15.02	3.55	0.1	1.23	2.37	4.53	2.14	0.15	2.97	102.979	40.7506	6.67	1.06589	78	585	7.1	1.2	11.2	0.7	23.3	46.6	34.4	5.3	290	19.5	4	209	5.6	1.1	3.3	0.6	3.6	21.5	0.8	2.5	0.4	2.5	0.4	13.4884	9.32	6.68523	0.96378	0.925613
DZ07-4	91.3833	29.6667	Dacite	174.2	64.72	0.49	15.77	3.76	0.11	1.18	3.92	2.54	3.14	0.13	4.58	103.8	38.3846	5.68	1.0709	113	487	6	1	10.5	0.6	26.3	55.9	22.5	5.5	198	20.4	4	207	5.3	1.3	3.4	0.6	3.7	21.5	0.8	2.4	0.4	2.4	0.4	9.2093	10.9583	7.86041	1.03182	1.0777
DZ09-1	91.3833	29.6667	Basalt		50.5	0.92	17.87	9.94	0.22	7.39	2.41	4.52	0.19	0.27	6.08	109.562	59.6093	4.71	1.48521	7.1	83.2	2.1	0.4	5.7	0.3	14.2	28.9	11.8	3.6	213	15.5	3.7	106	2.5	1.1	3.6	0.6	3.5	19.8	0.7	2.1	0.3	2	0.3	10.7576	7.1	5.09283	1.17126	0.921434
DZ10-1	91.3833	29.6667	Andesite		56.4	0.77	18.46	5.52	0.19	1.87	4.61	2.99	2.98	0.28	6.36	105.512	40.2084	5.97	1.11545	97.9	379	4.2	0.9	8.5	0.5	18.9	37.1	7.5	4.4	121	18.3	4.1	141	3.7	1.5	4.1	0.7	4	22.3	0.8	2.5	0.4	2.5	0.4	5.42601	7.56	5.42278	1.07087	1.11849
DZ11-1	91.3833	29.6667	Basalt		46.86	0.83	16.92	10.06	0.21	6.08	6.75	3.31	2.12	0.27	7.45	110.189	54.5396	5.43	0.844288	81.6	494	1.2	0.5	5.5	0.1	12.2	26.5	16.6	3.4	516	14.8	3.5	82.6	2.1	1.1	3.3	0.5	3.1	17	0.7	1.9	0.3	1.8	0.3	30.3529	6.77778	4.8617	1.15267	0.989522
DZ13-1	91.3833	29.6667	Basalt		50.36	0.88	16.01	8.8	0.16	7.84	7.75	2.52	0.02	0.19	6.05	108.803	63.8795	2.54	0.875649	0.8	8.66	1.2	0.5	6.6	0.3	10.9	24.2	13.3	3.2	474	14	3.4	81.8	2.4	1.1	3.4	0.6	3.7	20.1	0.7	2.3	0.3	2.1	0.3	23.5821	5.19048	3.72313	1.17923	0.989094
YB5-1	91.4667	29.7917	Basalt		46.94	0.92	19.18	11	0.16	2.09	6.32	5.98	1.37	0.44	5.67	110.157	27.3869	7.35	0.839899	48.3	254	1.8	0.6	4.8	0.3	19.3	39.7	11.8	5.4	679	23	5	95.3	2.7	2	4.8	0.8	4.5	27.5	0.9	2.7	0.4	2.5	0.4	24.6909	7.72	5.53755	1.20472	1.2481
YB5-2	91.4667	29.7917	Basalt		50.5	1.01	16.92	10.02	0.17	6.68	3.37	6.18	0.09	0.31	5	109.557	56.9591	6.27	1.03152	2.5	96.7	1	0.3	4.9	0.3	10.7	23.6	5.5	3.4	365	14.7	3.3	78	2.2	1.1	3.4	0.6	3.5	20.5	0.7	2.2	0.3	2	0.3	17.8049	5.35	3.83755	1.17126	1.00397
YB5-3	91.4667	29.7917	Basalt		48.22	1.09	18.41	11.38	0.15	6.64	3.67	6.15	0.05	0.39	4.05	110.747	53.666	6.2	1.09215	0.5	95.5	1.3	0.4	5.2	0.3	12.9	28.6	5.7	4	343	17.4	3.9	97.8	2.7	1.3	3.9	0.7	4.2	24.7	0.8	2.6	0.4	2.4	0.4	13.8866	5.375	3.85549	1.17126	1.01907
ML31-1	93.32	29.61	Monzogranite	191.9	74.23	0.28	13.54	1.98	0.05	0.46	2.32	3.76	2.59	0.07	1.03	102.128	31.562	6.35	1.02405	78.62	519.82	10.81	1.54	9.2	0.73	29.23	49.72	16.73	5.4	285.85	17.89	2.81	162.71	3.83	0.95	2.65	0.38	2.2	13.19	0.47	1.43	0.24	1.49	0.27	21.6717	19.6174	14.0716	0.988215	1.06432
ML38-5	93.32	29.61	Syenogranite	203.2	74.73	0.11	13.75	1.43	0.05	0.28	0.69	3.61	5.1	0.05	0.5	101.612	27.9893	8.71	1.08014	255.48	275.82	22.52	3.23	22.55	2.92	19.66	42.6	28.49	4.8	88.96	17.77	4.64	115.38	4.17	0.32	5.03	0.97	6.73	43.95	1.54	4.89	0.83	5.07	0.79	2.02412	3.87771	2.78148	0.888428	0.202503
ML45-1	93.32	29.61	Granodiorite	201.3	66.46	0.62	15.31	4.67	0.09	1.65	4.22	3.41	2.29	0.17	1.51	104.701	41.2235	5.7	0.970134	64.39	618.79	9.95	1.36	14.35	1	36.77	69.02	11.75	7.97	368.48	29.08	5.59	161.85	4.09	1.26	4.95	0.75	4.34	23.45	0.91	2.55	0.42	2.47	0.37	15.7134	14.8866	10.6782	1.176	0.732294
Cretaceous
07TB33a-1	91.42	29.35	Monzonite	91.3	58.96	0.97	16.62	6.44	0.1	3.36	5.47	3.69	3.1	0.26	1.02	99.99	50.8765	3.61775	0.856803	91.4	366	12.1	2.72	7.6	0.52	28.3	59.5		7.41	716	29.2	5.05	143	3.52	1.29	3.99	0.57	3.02	16	0.57	1.56	0.23	1.44	0.22	44.75	19.6528	14.0969	1.40365	0.87858
07TB33a-2	91.42	29.35	Diorite		52.17	1.05	17.07	8.46	0.13	5.57	8.08	3.86	2.23	0.31	1.25	100.19	56.6527	3.23586	0.726777	41.3	297	3.25	0.89	4	0.26	20.2	42.4		5.54	937	21.9	4.03	57	1.61	1.28	3.28	0.48	2.58	13.4	0.5	1.35	0.19	1.2	0.19	69.9254	16.8333	12.0745	1.43898	1.07633
07TB33b-1	91.42	29.35	Monzonite		58.48	1.01	15.8	6.95	0.09	3.12	5.22	3.83	3.21	0.29	1.64	99.65	47.1217	3.53414	0.818992	102	357	14	2.42	8.3	0.6	30	62.2		7.83	693	30.8	5.48	97	2.5	1.3	4.29	0.63	3.32	17.5	0.63	1.72	0.25	1.53	0.24	39.6	19.6078	14.0647	1.45232	0.819687
07TB33b-2	91.42	29.35	Monzonite	93.3	59.26	0.97	16.6	6.68	0.1	3.18	5.11	3.59	3.31	0.26	0.95	100.03	48.5857	3.68369	0.882728	87.1	437	10.9	2.69	8.2	0.54	29.9	62.3		7.74	735	30.4	5.24	127	3.22	1.32	4.07	0.59	3.12	16.6	0.59	1.65	0.24	1.49	0.23	44.2771	20.0671	14.3941	1.40147	0.873846
07TB33c-1	91.42	29.35	Diorite		52.77	0.55	18.8	7.44	0.14	5.55	8.03	4.03	1.32	0.16	0.81	99.59	59.6903	2.26086	0.828617	42.4	144	0.75	0.23	0.8	0.05	8.3	18.1		2.55	656	11.2	2.37	43	1.21	0.85	2.05	0.32	1.91	10.5	0.39	1.11	0.17	1.06	0.18	62.4762	7.83019	5.61659	1.20599	1.17894
07TB33d	91.42	29.35	Diorite	90.3	52.86	0.58	18.69	7.04	0.13	5.54	8.57	4.18	0.64	0.14	1.32	99.69	60.9696	2.91797	0.806268	20.2	128	1.77	0.53	1.2	0.08	11.3	22.4		2.92	745	12.4	2.5	41	1.17	1.04	2.25	0.35	2.01	10.8	0.41	1.17	0.18	1.16	0.18	68.9815	9.74138	6.98749	1.15972	1.34059
07TB33e	91.42	29.35	Monzonite		57.69	0.97	16.75	6.47	0.1	3.55	5.79	3.65	3.06	0.27	1.04	99.34	52.1342	3.64133	0.842923	82.4	393	7.19	1.87	7.1	0.44	27.3	56.7		7.19	762	28.2	4.84	155	3.85	1.28	3.84	0.54	3.04	15.8	0.58	1.54	0.23	1.41	0.22	48.2278	19.3617	13.8881	1.44301	0.907706
07TB16	91.8517	29.2578	Diorite		58.69	0.71	17.81	7.14	0.11	3.31	6.33	3.48	1.7	0.15	0.62	100.06	47.9233	2.5014	0.932486	28.3	391	4.15	1.05	4.41	0.337	16.7	36.2	10.9	4.96	601	20.8	4.31	52.4	1.76	1.09	3.82	0.673	3.95	21.2	0.818	2.31	0.334	2.1	0.328	28.3491	7.95238	5.70424	1.25891	0.821258
07TB17	91.8511	29.2578	Diorite		60.88	0.63	17.11	6.33	0.1	2.84	5.37	3.49	2.58	0.14	0.71	100.17	47.1071	2.86197	0.933837	51.9	499	6.8	1.48	4.28	0.367	17.6	36.3	18.8	4.8	608	19.9	3.97	65.4	2.12	1.01	3.55	0.607	3.54	19	0.734	2.07	0.306	1.96	0.312	32	8.97959	6.44106	1.20882	0.822499
07TB18	91.8456	29.2567	Diorite	76.5	60.24	0.65	16.93	6.29	0.1	2.96	5.8	3.41	2.36	0.14	0.57	99.44	48.2976	2.7042	0.90365	44.1	440	5.58	1.28	4.51	0.36	17.3	37.2	10.6	4.85	493	20	4.13	80.7	2.52	0.986	3.66	0.633	3.73	20.2	0.778	2.23	0.333	2.17	0.339	24.4059	7.97235	5.71856	1.15044	0.775327
07TB19	91.8453	29.2569	Diorite		59.78	0.68	17.05	7.01	0.11	3.14	6.08	3.38	1.88	0.14	0.76	100.02	47.0667	2.95275	0.912989	50.5	356	5.6	1.01	4.11	0.323	16.1	33.7	10.7	4.34	506	17.9	3.52	39.5	1.25	0.996	3.19	0.551	3.28	18	0.662	1.87	0.278	1.83	0.294	28.1111	8.79781	6.31067	1.1996	0.908691
07TB20a	91.8419	29.2581	Diorite		60.47	0.64	17.16	6.27	0.1	2.84	5.65	3.46	2.31	0.13	0.9	99.93	47.3444	2.37467	0.928073	47.9	396	4.46	1.4	4.69	0.372	16.7	36.6	11.3	5.04	510	21.4	4.54	67.1	2.16	1.02	4.09	0.708	4.24	23.7	0.883	2.5	0.371	2.38	0.375	21.519	7.01681	5.03315	1.19235	0.723659
07TB21	91.8419	29.2581	Diorite		60.13	0.65	16.98	6.48	0.11	2.96	5.68	3.48	2.13	0.14	0.61	99.33	47.5549	2.52475	0.923722	38.8	405	4.16	1.37	4.57	0.335	15.8	34.8	9.7	4.72	517	20.1	4.04	50.8	1.64	0.94	3.6	0.618	3.8	20.2	0.77	2.16	0.323	2.05	0.319	25.5941	7.70732	5.52846	1.24064	0.753546
09TB117-1	91.4083	29.3019	Diorite	91.1	50.94	1.39	17.02	8.96	0.13	5.02	8.91	3.07	1.96	0.2	2.05	99.65	52.6552	3.65256	0.727152	40.8	367	3.67	4.48	4.07	0.256	21.5	43	5.2	5.21	784	19.1	3.8	46.4	1.58	1.48	3.36	0.479	2.49	12.8	0.464	1.2	0.168	1.04	0.159	61.25	20.6731	14.8288	1.60244	1.26626
09TB118-1	91.4172	29.3575	Diorite		50.48	1	17.74	8.34	0.16	5.71	10.01	2.73	1.36	0.22	1.89	99.65	57.6105	2.40541	0.733072	37.3	237	4.1	1.32	3.75	0.284	13.6	30.6	6.8	4.24	922	17	3.65	60.1	1.84	1.17	3.22	0.491	2.68	14.5	0.507	1.4	0.19	1.22	0.187	63.5862	11.1475	7.99613	1.47025	1.04336
09TB122	91.4333	29.1444	Granodiorite		66.61	0.5	15.48	3.47	0.05	1.81	3.26	3.66	3.97	0.13	0.81	99.77	50.8705	5.42553	0.951619	129	448	12.9	3.73	5.67	0.716	23.7	45.3	11.3	5.14	513	17	2.82	77.2	2.28	0.797	2.18	0.306	1.61	9.68	0.319	0.873	0.126	0.884	0.142	52.9959	26.81	19.2308	1.21896	0.982719
09TB123-1	91.45	29.3061	Granodiorite		64.18	0.62	16.55	4.2	0.08	1.7	3.69	4.08	3.73	0.23	0.72	99.77	44.5515	4.24626	0.946754	91.6	506	12.4	2.79	5.86	0.659	24.6	50.8	11.1	6.17	747	22.1	3.74	125	3.14	1.09	3.02	0.421	2.16	12.6	0.42	1.13	0.162	1.12	0.175	59.2857	21.9643	15.755	1.29078	0.991541
09TB124	91.4553	29.3025	Granite	91.8	74.2	0.19	13.99	0.98	0.04	0.33	0.77	3.85	4.82	0.03	0.58	99.78	40.0637	10.1223	1.07893	157	375	22.1	5.06	8.25	1.17	32.3	53.2	12.8	5.17	152	14.3	2.06	117	3.87	0.421	1.74	0.224	1.31	8.67	0.264	0.793	0.143	1.04	0.181	17.5317	31.0577	22.2777	0.84305	0.679826
09TB125	91.4608	29.3039	Diorite		57.27	0.94	17.01	6.86	0.11	3.69	6.43	3.88	2.24	0.32	0.98	99.72	51.6386	3.31656	0.828719	60.2	524	8.52	1.91	5.43	0.453	24.3	52.6	9.6	6.77	956	25.6	4.73	121	3.01	1.42	4	0.543	2.9	15.8	0.544	1.42	0.208	1.34	0.205	60.5063	18.1343	13.0077	1.44847	0.998048
09TB67-1	92.1719	29.2697	Gabbro	94.4	47.37	0.73	13.83	12.06	0.16	12.32	8.73	1.33	1.06	0.16	1.8	99.52	66.9733	1.7441	0.718839	33.1	119	1.05	0.289	3.08	0.221	8.24	21.6	2.32	3.16	532	13.5	3.05	35.5	1.14	0.837	2.81	0.458	2.44	13.5	0.482	1.29	0.171	1.11	0.168	39.4074	7.42342	5.32482	1.47124	0.87407
09TB67-2	92.1719	29.2697	Gabbro	94.4	43.85	1.9	15.22	15.3	0.13	8.5	10.49	1.23	0.89	0.13	1.92	99.55	52.4446	1.20867	0.68881	33.1	160	1.3	0.333	4.65	0.309	9.38	26.2	5.94	4.15	650	19.2	5.01	33.5	1.25	1.27	5.04	0.792	4.42	23.2	0.856	2.14	0.286	1.75	0.249	28.0172	5.36	3.84473	1.69044	0.772669
09TB68	92.1714	29.2706	Gabbro	94.4	44.95	0.4	14.37	10.69	0.13	13.9	11.15	1.03	0.51	0.05	2.4	99.59	72.0759	1.71821	0.637057	15.4	83.3	0.624	0.144	0.69	0.06	3.46	8.38	0.769	1.19	566	5.29	1.3	21.8	0.569	0.483	1.27	0.196	1.04	5.28	0.197	0.482	0.058	0.359	0.055	107.197	9.63788	6.91325	1.93889	1.1492
09TB69	92.1708	29.2711	Gabbro	94.4	50.1	1.15	17.58	10.66	0.15	5.9	9.2	2.93	0.92	0.34	0.71	99.64	52.3508	2.33035	0.778711	30.1	280	0.454	0.137	3.24	0.2	14.8	34.7	3.29	4.81	861	19.8	4.1	38.8	0.966	1.3	3.82	0.582	3.1	16.4	0.586	1.53	0.205	1.28	0.197	52.5	11.5625	8.29378	1.62094	1.00425
09TB71	92.1697	29.2722	Gabbro	94.4	43.72	1.07	16.09	13.2	0.17	11.02	9.51	1.34	0.89	0.03	2.5	99.55	62.3667	1.11783	0.785183	29.9	83.5	10.2	1.4	1.89	0.165	5.16	13.7	2.03	2.13	439	10.5	2.98	27.9	1	0.856	3.01	0.491	2.93	14.2	0.581	1.5	0.205	1.25	0.187	30.9155	4.128	2.96101	1.56882	0.873788
09TB72-1	92.1686	29.2731	Gabbro	94.4	40.34	1.12	15.86	19.61	0.15	8.1	11.18	0.89	0.57	0.03	1.65	99.49	45.0531	1.47627	0.706576	16.2	99.1	0.668	0.175	0.68	0.077	3.11	7.46	2.32	1.09	493	5.1	1.36	19.5	0.617	0.486	1.39	0.222	1.33	6.68	0.263	0.74	0.105	0.631	0.097	73.8024	4.92868	3.53534	1.41071	1.08065
09TB72-2	92.1686	29.2731	Gabbro	94.4	39.77	1.07	16.36	19.22	0.16	8.94	8.83	0.94	0.44	0.03	3.78	99.54	48.0069	1.7921	0.903512	13.5	84.5	0.685	0.202	1.04	0.105	3.47	8.17	2.37	1.15	537	5.34	1.25	14.1	0.534	0.45	1.26	0.201	1.19	6.21	0.238	0.679	0.095	0.61	0.098	86.4734	5.68852	4.08038	1.30567	1.09622
09TB73	92.1683	29.2736	Gabbro	94.4	44.83	0.47	13.66	11.48	0.13	14.49	10.67	1.05	0.5	0.06	2.21	99.55	71.4737	1.64882	0.629359	16.3	110	1.17	0.368	0.82	0.102	3.78	8.85	2.2	1.28	510	5.88	1.48	20.8	0.614	0.496	1.43	0.22	1.21	5.53	0.219	0.568	0.075	0.452	0.07	92.2242	8.36283	5.99866	1.79169	1.04233
09TB76	92.1669	29.2753	Gabbro	94.4	42.7	1.24	19.76	14.1	0.1	4.99	13.4	1.34	0.31	0.06	1.6	99.6	41.2633	1.235	0.733263	7.45	62.2	0.251	0.11	0.82	0.099	3.52	9.09	2.78	1.44	798	7.11	1.84	18.8	0.645	0.654	1.8	0.265	1.52	6.85	0.281	0.687	0.092	0.545	0.089	116.496	6.45872	4.63283	1.86665	1.09864
09TB78-1a	92.1669	29.2756	Diorite	94.4	52.17	0.8	17.21	9.03	0.1	3.88	11.38	1.85	1.72	0.04	1.56	99.74	46.0317	2.05686	0.671275	76.6	256	2.09	1.43	4.21	0.464	10.1	23.1	11.6	3.04	589	12.6	3.17	37.5	1.23	0.583	3.38	0.609	3.84	20.4	0.758	2.17	0.311	1.9	0.269	28.8725	5.31579	3.81301	1.35267	0.544508
09TB79	92.1628	29.2789	Gabbro	94.4	46.66	0.82	17.94	11.28	0.13	7.66	11.8	1.88	0.54	0.03	0.86	99.61	57.4108	1.84213	0.712705	15.7	111	0.603	0.164	0.84	0.111	4.48	9.92	5.52	1.36	852	6.16	1.57	20.9	0.62	0.71	1.6	0.252	1.43	6.96	0.279	0.74	0.101	0.607	0.09	122.414	7.38056	5.29407	1.57675	1.36953
09TB21-2	94	29.2	Diorite	91.6	56.03	0.69	17.56	8.03	0.12	3.58	7.59	3.46	1.41	0.14	1.08	99.71	46.9495	2.2861	0.834327	30.5	267	2.3	0.885	2.56	0.261	9.88	23	10.7	3.04	479	12.6	2.79	7.38	0.392	0.772	2.61	0.443	2.61	14.9	0.536	1.49	0.213	1.42	0.221	32.1477	6.95775	4.99079	1.23018	0.874618
09TB22	94	29.2003	Diorite		53.99	0.78	18.1	8.91	0.13	3.98	7.81	3.16	1.01	0.11	1.7	99.69	46.9975	2.10604	0.882065	21.7	217	1.9	0.603	1.68	0.208	7.96	17.8	7.73	2.46	551	10.5	2.44	26	0.835	0.923	2.4	0.417	2.44	14	0.508	1.38	0.199	1.33	0.218	39.3571	5.98496	4.29301	1.22787	1.16607
09TB36	94	29.2114	Granodiorite	99.5	62.47	0.64	16.73	5.74	0.1	2.74	5.66	3.15	1.61	0.2	0.73	99.78	48.654	3.15965	0.970498	35.2	287	0.875	0.205	4.86	0.432	13.9	29.5	5.56	3.76	511	14.4	2.84	54.6	1.36	0.947	2.62	0.396	2.22	11.8	0.444	1.2	0.17	1.13	0.172	43.3051	12.3009	8.82342	1.31489	1.06136
09TB38-1	94	29.2106	Diorite		56.05	0.84	17.6	7.89	0.15	4.32	7.4	3.15	1.41	0.27	0.61	99.69	52.0815	2.28914	0.871683	25.8	218	1.24	0.132	5.53	0.326	13.9	33.3	4.75	4.52	498	19	3.92	32.7	1.04	1.13	3.76	0.574	3.26	18.3	0.647	1.78	0.265	1.7	0.255	27.2131	8.17647	5.86498	1.28346	0.89984
09TB38-2	94	29.2106	Granodiorite		63.18	0.58	17.01	5.21	0.1	2.38	5.72	3.23	1.55	0.18	0.64	99.78	47.5562	3.16456	0.97678	29.2	399	0.23	0.085	3.76	0.329	12.5	25.4	5.85	3.28	517	12.8	2.55	26.4	0.71	0.902	2.28	0.351	1.97	10	0.395	1.02	0.149	0.966	0.153	51.7	12.94	9.28183	1.36491	1.14365
09TB39	94	29.2094	Diorite		59.56	0.67	17.76	6.21	0.1	3.19	6.94	3.39	1.16	0.21	0.57	99.75	50.4877	2.57292	0.911867	22.7	279	0.464	0.092	3.67	0.339	11	24.3	4.59	3.21	592	13.2	2.76	36.3	0.976	0.941	2.58	0.406	2.4	13	0.476	1.29	0.186	1.21	0.19	45.5385	9.09091	6.52091	1.32752	1.07807
09TB40	94	29.2089	Diorite		56.4	0.79	18.18	7.2	0.12	3.81	7.5	3.36	0.92	0.2	1.25	99.74	51.2297	2.27505	0.900591	16.5	253	0.208	0.065	3.89	0.279	11.7	26.7	3.68	3.81	606	15.6	3.32	29.4	0.899	1.07	3.08	0.504	2.88	15.1	0.566	1.52	0.219	1.38	0.222	40.1325	8.47826	6.08145	1.39678	1.02297
09TB41-1	94	29.2086	Granodiorite		64.09	0.54	17.53	4.81	0.07	2.24	5.29	3.16	0.98	0.17	1.01	99.88	48.0367	3.65717	1.10269	21	258	0.239	0.088	2.86	0.309	11.5	22.4	4.36	2.85	598	10.5	2.03	45.2	1.13	0.784	1.91	0.285	1.63	8.77	0.328	0.843	0.121	0.788	0.115	68.187	14.5939	10.4682	1.38445	1.21724
09TB41-3	94	29.2086	Diorite		55.74	0.75	17.9	7.79	0.12	3.85	7.61	3.57	1.01	0.23	1.14	99.7	49.5221	2.32796	0.859327	14.2	210	0.203	0.08	3.83	0.252	11.9	28.1	4.54	3.88	571	15.7	3.3	30.1	0.88	1.06	3.14	0.507	2.94	16.5	0.6	1.62	0.237	1.51	0.245	34.6061	7.88079	5.65289	1.30312	1.00672
09TB42-1	94	29.2097	Diorite	93.6	56.9	0.77	17.74	7.53	0.12	3.6	7.32	3.82	0.78	0.23	0.91	99.72	48.6925	2.38772	0.866899	8.57	191	0.442	0.226	3.15	0.217	10.8	23.8	4.51	3.3	644	13.7	2.92	31.8	0.89	1	2.75	0.422	2.32	12.3	0.467	1.26	0.176	1.16	0.185	52.3577	9.31034	6.67831	1.33858	1.07886
09TB45-1	94	29.1972	Granodiorite	94.7	64.39	0.55	16.36	5.66	0.1	2.38	5.03	3.35	1.48	0.12	0.39	99.79	45.4954	3.30814	1.00497	38.8	239	1.72	0.638	2.64	0.317	10.3	20.7	8.63	2.6	380	10	2.01	32	0.881	0.636	1.91	0.303	1.72	10.1	0.363	1.02	0.152	1.01	0.17	37.6238	10.198	7.31504	1.13978	0.992353
09TB45-2	93.9894	29.1656	Granodiorite		65.74	0.48	16.47	4.9	0.08	2.01	4.26	3.31	2.08	0.11	0.37	99.81	44.8817	3.73919	1.06521	46.4	409	2.39	0.64	2.52	0.317	11.7	23.3	11	2.83	387	10.6	2.02	67.2	1.95	0.686	1.9	0.3	1.68	9.6	0.357	1.01	0.146	1	0.173	40.3125	11.7	8.39241	1.12441	1.07052
09TB45-3	93.9894	29.1656	Diorite		57.34	0.74	18.55	8.07	0.11	3	6.82	3.36	1.15	0.17	0.42	99.74	42.4606	1.77017	0.966259	21.3	187	1.19	0.479	2.7	0.278	9.46	22.2	9.08	3.29	516	14.4	3.45	57.9	1.586	0.951	3.52	0.598	3.48	18.5	0.684	1.81	0.252	1.58	0.246	27.8919	5.98734	4.29472	1.47414	0.834302
09TB46-1	93.9742	29.1828	Diorite		55.05	0.86	16.79	9.16	0.13	4.54	7.58	3.13	1.54	0.16	0.73	99.68	49.5933	2.38042	0.813988	42.8	353	2.01	0.509	3.55	0.32	12.5	27.9	7.25	3.72	456	15.1	3.39	39.4	1.082	1.03	3.28	0.536	3.01	16.1	0.607	1.61	0.222	1.46	0.229	28.323	8.56164	6.14126	1.37984	0.944331
09TB46-2	93.9742	29.1828	Diorite	92	55.68	0.83	18.01	8.47	0.12	3.81	7.28	3.3	1.4	0.17	0.65	99.72	47.1717	2.63824	0.891223	37.1	281	2.7	0.712	3.79	0.331	13.2	28.6	7.97	3.7	509	15.1	3.23	55.6	1.42	1.03	3.05	0.49	2.68	14.9	0.543	1.43	0.209	1.34	0.205	34.1611	9.85075	7.06594	1.33858	1.00325
09TB47-1	93.9333	29.1775	Diorite	88.7	57.95	0.85	21.09	5.5	0.06	1.31	6.87	5.17	0.36	0.15	0.46	99.77	32.1024	3.22785	0.985084	3.05	108	0.724	0.36	2.48	0.346	7.15	14.3	9.49	1.78	907	6.95	1.43	8.92	0.347	0.635	1.37	0.208	1.19	6.54	0.242	0.637	0.087	0.579	0.092	138.685	12.3489	8.85784	1.37557	1.38698
09TB47-3	93.9333	29.1775	Diorite		54.51	0.94	17.07	9.78	0.14	4.17	7.45	3.39	1.42	0.21	0.58	99.67	45.8403	2.38957	0.825132	28	269	1.91	0.515	3.46	0.303	12.4	28	7.6	3.8	468	15.4	3.35	21	0.635	0.949	3.21	0.518	2.96	16.4	0.594	1.62	0.236	1.43	0.227	28.5366	8.67133	6.21994	1.38539	0.884739
09TB48-1	93.9133	29.1631	Granodiorite		63.67	0.54	16.46	5.81	0.08	2.23	5.3	3.65	1.4	0.13	0.5	99.77	43.2433	3.32468	0.958227	29.5	349	1.29	0.407	1.88	0.262	10.3	20.8	6.39	2.61	495	10	2	30.2	0.829	0.764	1.95	0.301	1.61	9.05	0.329	0.871	0.142	0.849	0.132	54.6961	12.1319	8.70222	1.26921	1.18273
09TB50	93.87	29.1183	Diorite		57.91	0.68	17.06	7.07	0.11	2.96	6.4	4.83	1.67	0.17	0.88	99.73	45.3876	2.55441	0.796623	41.6	312	1.03	0.289	2.96	0.277	11	24.1	9.25	3.15	480	12.8	2.78	46.1	1.17	0.818	2.65	0.416	2.45	13.6	0.499	1.33	0.196	1.25	0.193	35.2941	8.8	6.31224	1.31181	0.921365
09TB51-1	93.8361	29.1233	Diorite		55.31	0.78	18.32	8.74	0.13	3.58	7.64	3.22	0.9	0.18	0.9	99.7	44.8459	2.49588	0.907392	18	215	2.4	0.676	2.82	0.315	10.4	23.2	8.11	3.06	514	12.4	2.69	34.4	0.98	0.913	2.75	0.443	2.59	14.5	0.531	1.49	0.208	1.41	0.234	35.4483	7.37589	5.29072	1.22941	1.02625
09TB51-2	93.8361	29.1233	Diorite	91.2	53.91	0.81	18.5	9.66	0.16	3.92	8.06	3.24	0.91	0.21	0.3	99.67	44.6147	3.04514	0.881016	17.5	212	2.05	0.569	2.56	0.348	10	21.6	6.8	2.71	560	10.6	2.12	23.5	0.683	0.877	2.05	0.342	1.94	11.1	0.408	1.09	0.156	1.07	0.177	50.4505	9.34579	6.70373	1.21348	1.28611
09TB159	91.5	29.67	Mafic rock	92.3	49.69	0.86	19.55	9.9	4.71	7.67	2.97	0.1	0.11	4.05		99.8	60.5977	1.45253	3.43373	3.75	55	0.786	0.21	1.75	0.133	4.77	11.3	7.94	1.66	1342	7.76	2.12	45.2	1.19	0.767	2.39	0.428	2.72	14.1	0.547	1.58	0.238	1.5	0.237	95.1773	3.18	2.28101	1.21365	1.04172
09TB160-1	91.5	29.67	Mafic rock	92.3	40.71	0.83	15.28	12.35	9.27	13.57	1.31	0.46	0.02	5.82		99.77	68.5649	2.41035	4.82849	1.27	17.2	2.22	0.575	5.88	0.379	14.3	30.9	3.16	4.11	733	17.5	3.83	111	2.6	1.2	3.77	0.616	3.87	20.7	0.789	2.16	0.327	2.13	0.325	35.4106	6.71362	4.81567	1.21604	0.965461
09TB160-3	91.5	29.67	Mafic rock	92.3	50.58	1.02	17.32	9.84	6.83	4.74	3.5	0.06	0.28	5.47		99.78	48.881	2.50967	2.5555	2.57	18.2	2.4	0.635	6.2	0.407	15.9	34.6	3.68	4.63	882	18.8	4.09	119	2.67	1.25	4.05	0.636	4	22	0.82	2.32	0.341	2.32	0.365	40.0909	6.85345	4.91598	1.15395	0.938954
09TB161	91.5	29.67	Mafic rock	92.3	52.91	0.96	17.16	9.32	4.58	6.4	4.23	0.03	0.23	3.83		99.81	57.6833	2.21286	2.14404	0.466	16.9	2.11	0.634	4.49	0.322	12.1	26.7	7.12	3.6	798	15.4	3.53	102	2.4	1.09	3.64	0.591	3.67	20.4	0.755	2.13	0.324	2.1	0.353	39.1176	5.7619	4.13301	1.16967	0.929634
09TB162	91.5	29.67	Mafic rock	92.3	46.09	1.03	17.93	10.92	9.01	4.48	3.52	1.52	0.2	4.81		99.67	44.8849	2.04071	1.96405	27.7	299	1.01	0.302	2.66	0.167	10.4	23.1	0.629	3.06	336	13.5	3.29	55.4	1.47	0.986	3.45	0.589	3.73	20.5	0.777	2.16	0.311	2.02	0.318	16.3902	5.14851	3.69303	1.23587	0.894732
09TB163	91.5	29.67	Mafic rock	92.3	49.62	0.74	15.18	9.86	11	3.23	2.94	0.36	0.12	6.65		99.85	39.4042	1.72846	2.49775	3.27	123	0.644	0.192	1.31	0.089	5.81	13.2	1.38	1.87	128	8.61	2.17	35	0.986	0.57	2.32	0.391	2.48	12.4	0.497	1.41	0.205	1.33	0.214	10.3226	4.36842	3.13347	1.248	0.776649
09TB164	91.5	29.67	Mafic rock	92.3	48.19	1.01	18.18	11.49	7.48	4.36	4.25	0.54	0.21	3.78		99.66	42.9631	1.90171	2.05254	9.29	158	1.21	0.375	2.88	0.177	9.78	22.4	1.37	3.03	320	13.6	3.32	54.5	1.48	1.02	3.51	0.608	3.67	18	0.748	2.07	0.297	1.87	0.298	17.7778	5.22995	3.75144	1.31353	0.913485
09TB165	91.5	29.67	Mafic rock	92.3	44.48	0.79	17.09	11.53	12.19	4.36	1.95	1.85	0.09	5.21		99.71	42.878	1.59627	2.55342	21.8	582	0.848	0.192	1.77	0.121	6.33	14.9	1.53	2.17	235	10	2.56	38.9	1.19	0.91	2.81	0.466	2.98	14.8	0.626	1.68	0.259	1.65	0.26	15.8784	3.83636	2.75182	1.20878	1.03727
09TB166	91.5	29.67	Mafic rock	92.3	41.1	0.86	18.31	13.87	5.89	14.68	1.01	0.06	0.26	3.51		99.69	67.7522	2.38726	8.24596	0.721	32.6	1.32	0.484	3.35	0.205	14.2	30	8	3.68	745	16.4	3.84	58.8	1.45	1.43	4.14	0.659	3.93	23.6	0.808	2.22	0.315	2.06	0.315	31.5678	6.8932	4.94449	1.27685	1.09646
09TB167	91.5	29.67	Mafic rock	92.3	44.84	0.97	15.79	11.55	10.47	8.1	3.36	0.21	0.16	4.11		99.7	58.1961	1.87802	2.37833	1.37	57.3	1.3	0.258	3.1	0.191	9.6	22.4	3.33	3.09	346	13.7	3.3	57	1.47	1.01	3.37	0.579	3.6	18.4	0.737	2.05	0.301	1.91	0.303	18.8043	5.02618	3.60528	1.26149	0.925919
09TB169	91.5	29.67	Mafic rock	92.3	44.75	1.34	18.79	9.87	11.4	2.38	3.82	0.94	0.49	5.82		99.73	32.3715	1.74967	2.07946	11.8	441	1.82	0.412	4.22	0.256	11.6	28.1	1.52	3.97	91	17.9	4.28	75.5	2.1	0.543	4.3	0.688	4.17	17.5	0.822	2.3	0.341	2.15	0.332	5.2	5.39535	3.87008	1.29811	0.386961
09TB170	91.5	29.67	Mafic rock	92.3	47.61	0.78	16.58	10.43	10.53	4.81	3.3	0.51	0.27	4.73		99.7	47.7929	1.45955	2.32124	7.13	150	0.486	0.241	0.991	0.069	5.72	14	1.27	2.12	190	9.92	2.53	42	1.1	0.758	2.68	0.421	2.53	13	0.502	1.36	0.191	1.21	0.19	14.6154	4.72727	3.39087	1.39943	0.889949
09TB171	91.5	29.67	Mafic rock	92.3	50.35	0.82	17.04	11.03	6.38	6.96	3.8	0.24	0.14	2.72		99.63	55.6066	1.89299	2.28168	2.21	109	0.842	0.268	1.78	0.115	7.36	16.9	1.31	2.24	193	10.1	2.51	40.3	1.11	0.924	2.72	0.455	2.84	15.5	0.577	1.63	0.25	1.58	0.248	12.4516	4.65823	3.34134	1.20303	1.08112
09TB172	91.5	29.67	Mafic rock	92.3	55.04	1.17	16.75	10.47	3.98	3.76	5.04	0.49	0.22	2.69		99.7	41.6187	1.6996	1.63817	4.51	210	1.72	0.432	2.57	0.183	9.82	22.2	4.41	3.15	368	14.7	3.73	76.9	2.02	1.15	4.05	0.697	4.39	25.2	0.913	2.59	0.397	2.55	0.409	14.6032	3.85098	2.76231	1.15223	0.904565
09TB173	91.5	29.67	Mafic rock	92.3	46.56	0.81	17.04	10.99	8.05	9.7	2.52	0.2	0.14	3.49		99.66	63.6635	1.59723	3.36032	2.18	73.1	0.736	0.221	1.37	0.114	5.74	13.8	2.48	1.88	223	8.82	2.32	38.4	1.08	0.887	2.69	0.437	2.82	15.5	0.609	1.72	0.26	1.57	0.257	14.3871	3.65605	2.62248	1.20217	1.08549
11DZ01-1	91.5	29.67	Mafic rock	92.3	51.31	1.1	16.84	9.87	7.3	3.05	4.37	0.1	0.27	5.43		99.79	38.0198	2.54265	2.00068	1.32	24.1	2.23	0.618	6.26	0.362	15.4	32.6	2.64	4.28	511	17.8	3.91	119	2.72	1.1	3.93	0.632	3.83	21.1	0.835	2.24	0.335	2.13	0.324	24.218	7.23005	5.18611	1.20347	0.85789
11DZ01-2	91.5	29.67	Mafic rock	92.3	51.3	1.05	16.89	8.56	6.24	4.79	4.77	0.06	0.26	5.85		99.9	52.6246	2.42672	1.86238	0.965	17.1	2.24	0.597	6.12	0.348	15.6	33.4	2.39	4.36	609	18.7	4.15	118	2.61	1.26	4.03	0.636	3.91	21.8	0.838	2.29	0.325	2.14	0.337	27.9358	7.28972	5.22891	1.22286	0.941928
11DZ02-1	91.5	29.67	Mafic rock	92.3	47.82	1.35	19.9	12.16	5.37	3.78	4.15	0.22	0.2	4.31		99.46	38.1596	2.04195	2.44535	6.16	88.7	2.2	0.585	4.85	0.295	13	28.4	4.19	3.68	415	16.6	4.11	99.2	2.62	1.38	4.34	0.735	4.78	27.4	1.02	2.83	0.417	2.64	0.397	15.146	4.92424	3.53216	1.21182	0.998934
11DZ02-2	91.5	29.67	Mafic rock	92.3	48.28	1.13	17.32	10.22	4.74	7.12	1.91	0.85	0.19	7.78		99.71	58.035	1.95847	3.40711	26.4	276	1.86	0.482	3.9	0.249	10.8	24	2.73	3.23	269	14.3	3.56	82.2	2.1	1.14	3.63	0.594	3.83	21	0.822	2.36	0.338	2.27	0.364	12.8095	4.75771	3.4127	1.12924	0.969505
11DZ02-3	91.5	29.67	Mafic rock	92.3	53.93	1.09	16.13	10.46	3.97	5.78	3.39	0.04	0.17	4.59		99.75	52.3107	1.40231	2.51054	1.63	25.8	2.77	1.22	5.88	0.356	11.1	27.8	6.45	4.3	365	20	5.11	121	3.05	1.66	5.28	0.93	5.82	33.2	1.31	3.57	0.524	3.38	0.521	10.994	3.28402	2.35563	1.15245	0.977022
11DZ03-2	91.5	29.67	Mafic rock	92.3	47.89	1	16.04	9.91	4.22	8.76	1.19	0.58	0.18	9.96		99.94	63.6985	1.96478	4.83568	15.4	176	1.87	0.472	3.73	0.232	10.5	23.6	2.45	3.22	184	14.3	3.45	77.9	2.01	1.09	3.71	0.606	3.91	22	0.812	2.21	0.324	1.98	0.289	8.36364	5.30303	3.80386	1.32168	0.931437
11DZ04-1	91.5	29.67	Mafic rock	92.3	51.44	1.16	16.64	10.28	4.41	9.68	1.83	0.46	0.18	2.96		99.46	65.1471	1.97257	3.88304	12.5	294	3	0.744	4.5	0.298	12.1	26.8	4.39	3.75	385	16.4	3.96	97	2.5	1.11	4.08	0.688	4.4	24	0.963	2.67	0.386	2.42	0.362	16.0417	5	3.5865	1.21689	0.844246
11DZ04-2	91.5	29.67	Mafic rock	92.3	53	1.11	16.42	9.43	3.96	9.74	2.16	0.65	0.18	2.56		99.57	67.2165	2.05998	3.15832	17	436	2.82	0.73	4.4	0.28	12.7	27.9	14.1	3.82	419	16.8	3.98	79.6	2.06	1.22	3.98	0.688	4.34	23.8	0.909	2.51	0.367	2.36	0.361	17.605	5.38136	3.86004	1.23082	0.937131
11DZ04-3	91.5	29.67	Mafic rock	92.3	54.53	1.18	16.56	9.27	4.2	5.92	5.08	0.26	0.19	2.36		99.82	55.9024	2.26958	1.67497	4.14	101	2.85	0.724	4.44	0.298	13.5	28.6	3.56	3.73	418	16.1	3.84	95.9	2.5	1.15	3.91	0.671	4.19	23.7	0.907	2.59	0.37	2.51	0.405	17.6371	5.37849	3.85799	1.11726	0.907335
11DZ05-1	91.5	29.67	Mafic rock	92.3	43.99	0.94	17.47	11.61	7.86	11.06	0.31	0.01	0.16	5.57		99.17	65.4102	1.80622	23.1479	0.136	5.18	0.748	0.204	2.71	0.155	7.89	18.3	2.76	2.48	352	11.3	2.82	57.9	1.41	1.01	3.01	0.485	3.08	16.7	0.676	1.8	0.259	1.61	0.24	21.0778	4.90062	3.51521	1.28038	1.05983
11DZ05-2	91.5	29.67	Mafic rock	92.3	45.87	0.91	17.52	11.28	7.58	10.15	0.54	0.02	0.15	5.07		99.27	64.1089	1.81469	14.857	0.456	10.7	0.812	0.233	2.77	0.167	8.18	19.1	2.95	2.57	388	11.8	2.91	59.1	1.53	1	3.16	0.508	3.25	17.6	0.695	1.88	0.261	1.7	0.264	22.0455	4.81176	3.45148	1.27953	1.00817
11DZ06	91.5	29.67	Mafic rock	92.3	52.26	1.1	17.31	8.91	4.24	9.28	2.78	0.26	0.28	3.04		99.63	67.4001	2.32464	2.98698	5.49	184	3.85	0.906	5.7	0.352	15.7	33.8	6.06	4.49	548	19.1	4.36	122	2.89	1.32	4.39	0.711	4.38	24.9	0.944	2.59	0.396	2.49	0.372	22.008	6.30522	4.52273	1.17731	0.922406
11DZ07-1	91.5	29.67	Mafic rock	92.3	45.06	1.37	18.73	12.27	6.2	8.98	1.67	0.02	0.2	4.52		99.21	59.2302	1.49434	5.69005	0.427	7.69	0.936	0.258	2.76	0.152	8.31	20	2.98	2.92	366	14	3.59	65.5	1.74	1.18	3.72	0.652	4.23	23.3	0.908	2.58	0.364	2.43	0.388	15.7082	3.41975	2.45299	1.16506	0.987159
11DZ07-3	91.5	29.67	Mafic rock	92.3	46.23	1.23	18.44	12.11	5.42	9.92	0.85	0.03	0.18	4.59		99.22	61.9204	1.43639	10.2851	0.865	9.49	0.84	0.228	2.58	0.137	7.12	17.5	6.9	2.58	345	12.7	3.2	60.8	1.66	1.09	3.58	0.607	3.95	21.2	0.837	2.36	0.341	2.24	0.351	16.2736	3.17857	2.27999	1.18022	0.984541
11DZ08	91.5	29.67	Mafic rock	92.3	47	1	15.87	11.34	8.47	8.31	1.88	0.02	0.16	5.16		99.39	59.2612	1.51622	4.37093	0.418	21.7	0.725	0.253	1.75	0.106	6.13	14.5	1.86	2.02	360	9.92	2.61	43.9	1.18	1.03	2.92	0.5	3.19	17.6	0.689	1.87	0.278	1.8	0.278	20.4545	3.40556	2.4428	1.18613	1.14064
11DZ09-1	91.5	29.67	Mafic rock	92.3	45.67	0.89	16.24	11.26	7.95	10.19	3.16	0.11	0.13	3.56		99.34	64.2401	1.52537	2.67204	1.29	116	0.653	0.228	1.21	0.081	5.34	12.6	1.54	1.74	346	8.32	2.26	35.3	1.05	0.897	2.41	0.412	2.72	14.6	0.599	1.59	0.225	1.47	0.228	23.6986	3.63265	2.6057	1.23842	1.17504
11DZ09-2	91.5	29.67	Mafic rock	92.3	45.25	0.85	16.63	10.83	7.66	11.48	2.43	0.05	0.13	3.83		99.32	67.7856	1.53763	3.57681	0.607	99	0.654	0.221	1.23	0.08	5.24	12.3	1.27	1.7	404	8.13	2.2	35.8	1.02	0.857	2.42	0.404	2.66	14.4	0.592	1.58	0.229	1.52	0.24	28.0556	3.44737	2.4728	1.17126	1.1355
11DZ10	91.5	29.67	Mafic rock	92.3	43.28	0.95	17.93	11.82	11.27	4.73	3.09	0.47	0.13	5.46		99.31	44.2698	1.25015	2.74054	5.62	182	0.741	0.21	1.61	0.094	4.88	12.2	2.33	1.89	214	9.25	2.52	42	1.21	0.862	2.63	0.47	2.98	16.4	0.663	1.79	0.267	1.71	0.262	13.0488	2.8538	2.04703	1.16637	1.02365
11DZ12	91.5	29.67	Mafic rock	92.3	52.52	1.07	19.13	10.26	3.18	9.62	3.05	0.35	0.15	0.07		99.6	65.0501	1.71945	3.03944	8.59	176	1.7	0.531	2.51	0.163	8.31	19.1	4.75	2.61	624	11.7	3.12	61.3	1.62	1.03	3.39	0.57	3.61	20.6	0.788	2.16	0.319	2.21	0.366	30.2913	3.76018	2.69718	1.09328	0.968242
11DZ13-1	91.5	29.67	Mafic rock	92.3	49.03	0.95	15.86	11.02	7.61	6.83	1.89	0.43	0.21	5.48		99.46	55.1631	1.62552	3.62283	8.56	256	0.893	0.298	1.36	0.085	8.41	18.7	2.61	2.49	265	12	3.34	41.8	1.23	0.967	3.87	0.657	4.05	23.8	0.905	2.41	0.332	2.19	0.343	11.1345	3.84018	2.75456	1.23773	0.822283
11DZ13-2	91.5	29.67	Mafic rock	92.3	48	0.91	16.72	11.45	8.86	6.09	1.58	0.74	0.05	4.74		99.32	51.3574	1.27945	4.02937	15.2	381	0.822	0.23	1.25	0.083	4.38	10.1	2.27	1.51	286	7.51	2.21	40.2	1.17	0.814	2.43	0.419	2.9	15.2	0.636	1.76	0.254	1.68	0.264	18.8158	2.60714	1.8701	1.15532	1.07386
11DZ14-2	91.5	29.67	Mafic rock	92.3	47.7	0.97	16.38	10.97	7.81	6.66	3.79	0.79	0.17	4.01		99.43	54.6516	1.7201	1.95294	10.4	769	0.926	0.294	2.2	0.126	8.1	18.1	1.67	2.51	290	11.6	3.04	46.8	1.26	1.03	3.13	0.528	3.27	17.6	0.719	1.96	0.274	1.75	0.268	16.4773	4.62857	3.32007	1.25062	1.02083
12LS206	93.64	29.14	Granitoid		65.76	0.25	18.11	2.44	0.08	0.62	3.51	5.12	2.45	0.1	0.74	99.32	33.5283	5.73221	1.03634	58.5	658	4.15	0.5	3.7	0.2	20.6	38	16	4.17	832	14.6	2.32	117	3	0.73	1.7	0.22	1.16	8.7	0.25	0.74	0.1	0.65	0.11	95.6322	31.6923	22.7329	1.19443	1.12377
12LS209	93.52	29.17	Granitoid		67.13	0.23	16.82	2.21	0.06	0.57	3.45	5.01	1.96	0.1	0.68	98.38	33.8617	5.85236	1.01003	37.7	540	1.65	0.37	2.3	<0.1	9.7	17.9	12	2	847	6.6	1.07	119	3	0.54	0.81	0.12	0.57	3.4	0.1	0.31	0.05	0.35	0.06	249.118	27.7143	19.8794	1.08999	1.7733
12LS212	93.52	29.17	Granitoid		68.16	0.23	17.61	2.27	0.04	0.53	3.82	5.47	0.83	0.01	1.27	100.45	31.6694	6.70085	1.04464	17.6	289	2.36	0.28	1.2	<0.1	16.4	30	11	3.31	919	11.3	1.58	113	3.1	0.62	1.09	0.12	0.53	3	0.1	0.29	0.05	0.32	0.06	306.333	51.25	36.7616	1.10851	1.44435
12LS215	93.47	29.15	Granitoid		68.77	0.16	16.86	1.49	0.05	0.37	2.74	5.15	2.46	0.06	0.56	98.8	33.0178	5.05228	1.04509	49.1	602	2.16	0.34	1.8	<0.1	10.8	20.5	16	2.35	735	8.4	1.38	91	2.6	0.42	0.98	0.13	0.63	3.9	0.12	0.36	0.05	0.38	0.06	188.462	28.4211	20.3864	1.10961	1.10413
12LS217	93.45	29.12	Granitoid	77	66.39	0.18	18.06	1.88	0.07	0.46	3.03	5.19	2.77	0.07	0.78	99.05	32.6919	5.926	1.05843	63.2	828	3.5	0.58	3.9	0.1	17.9	31.9	17	3.6	817	12.3	1.95	130	3.4	0.73	1.54	0.21	0.99	5.8	0.18	0.53	0.09	0.64	0.11	140.862	27.9687	20.062	1.03531	1.28786
12LS256	93.12	29.11	Granitoid		70.75	0.07	16.15	0.88	0.08	0.19	2	4.55	3.53	0.05	0.81	99.17	30.001	4.88114	1.07963	119.5	535	2.81	0.63	5.6	0.4	12.4	23.5	16	2.62	483	8.9	1.64	58	1.8	0.43	1.4	0.22	1.24	8.5	0.22	0.69	0.1	0.7	0.11	56.8235	17.7143	12.7064	1.1856	0.867573
12LS257	93.15	29.12	Granitoid	77	70.28	0.09	15.69	1.08	0.06	0.21	2.19	4.11	3.78	0.03	0.48	98.15	27.8491	5.30554	1.05641	113.5	859	4.81	0.77	4.6	0.4	14.3	27	22	2.95	572	10	1.74	76	2.2	0.58	1.48	0.22	1.2	8.5	0.24	0.71	0.13	0.86	0.14	67.2941	16.6279	11.9272	0.933895	1.10496
12LS262	93.15	29.1	Granitoid		70.57	0.1	16.36	1.17	0.07	0.24	2.32	4.59	3.33	0.04	0.83	99.74	28.9365	5.02497	1.063	108.5	413	4.56	0.82	5.4	0.3	14.4	26.9	17	3.01	530	10.3	1.85	78	2.1	0.51	1.74	0.27	1.49	10.3	0.29	0.86	0.14	0.88	0.14	51.4563	16.3636	11.7376	1.13323	0.869027
12LS269	93.31	29	Granitoid	81.3	66.92	0.33	16.04	3.13	0.09	0.98	3.28	4.07	3.16	0.15	1.53	99.81	38.3295	4.55824	0.996333	88.2	597	6.79	1.5	5.8	0.3	20.9	39.9	15	4.58	632	16.5	2.96	99	2.8	0.84	2.35	0.32	1.54	9.6	0.29	0.81	0.13	0.82	0.14	65.8333	25.4878	18.2824	1.25696	0.973695
12LS274	93.39	29.08	Granitoid	78.4	66.38	0.19	17.46	1.93	0.08	0.47	3.01	4.73	3.28	0.08	0.64	98.43	32.5877	5.35013	1.03785	79.8	811	7.14	0.55	4.9	0.3	27.1	50.3	19	5.69	761	19.5	3.27	105	2.9	0.78	2.42	0.32	1.5	8.5	0.28	0.77	0.11	0.77	0.13	89.5294	35.1948	25.2452	1.30381	0.847689
12LS276	93.74	29.13	Granitoid	80	69.56	0.18	15.86	1.77	0.06	0.44	2.75	4.31	3.36	0.08	0.63	99.14	33.0415	5.46758	1.00727	58.2	720	1.64	0.54	2.3	0.1	8.3	15.4	17	1.78	618	6.4	0.98	81	2.2	0.46	0.72	0.09	0.44	3.2	0.1	0.3	0.07	0.34	0.06	193.125	24.4118	17.5105	0.866142	1.67418
12LS278	93.74	29.14	Granitoid	78.1	67.71	0.25	16.68	2.53	0.07	0.64	3.47	4.73	2.04	0.13	0.84	99.24	33.4287	5.8927	1.02234	44.4	649	2.24	0.46	3.2	<0.1	15.7	28.4	12	3.13	755	11	1.72	112	2.9	0.64	1.34	0.18	0.91	5.3	0.17	0.47	0.07	0.45	0.07	142.453	34.8889	25.0258	1.35346	1.2888
ST124A	91.44	29.3	Monzodiorite	89.3	62.84	0.7	16.61	4.84	0.09	2.12	4.15	3.82	3.31	0.2		98.67	46.5095	4.50926	0.952673	93.9	330	14.4	4.11	6.6	0.58	27.8	47.4	9.92	5.9	641	22	3.98	194	4.83	0.96	3.2	0.46	2.53	14.6	0.49	1.36	0.21	1.36	0.21	43.9041	20.4412	14.6624	1.24508	0.822391
ST125A	91.46	29.3	Monzonitic granite		74.06	0.19	13.84	1.01	0.03	0.23	1.14	3.33	4.54	0.02		98.38	31.1315	6.6948	1.10887	150	342	20.8	5.28	6.36	0.68	22.4	35.3	12.4	3.99	199	13.2	2.16	117	3.46	0.45	1.7	0.25	1.44	9.53	0.28	0.86	0.15	1	0.16	20.8814	22.4	16.0675	0.96378	0.717934
ST126A	91.46	29.3	Diorite	95	56.16	0.96	17.66	7.11	0.11	3.8	6.47	3.57	1.87	0.3		98.02	51.4783	3.89476	0.897038	68.7	247	8.92	2.22	6.36	0.48	29.2	51.7	10.5	6.74	989	26.1	4.84	311	7.16	1.31	3.74	0.55	2.92	16.5	0.55	1.52	0.22	1.38	0.21	59.9394	21.1594	15.1776	1.41618	0.941318
ST129A	89.63	29.39	Monzodiorite	94.1	57.65	0.89	18.1	7.54	0.15	2.7	6.16	3.66	2.4	0.29		99.53	41.5489	2.80779	0.912043	65.5	516	8.07	2.14	8.44	0.57	25.4	55	7.25	6.64	551	27.9	5.84	184	4.91	1.51	5.17	0.8	4.5	27.3	0.91	2.56	0.39	2.48	0.38	20.1832	10.2419	7.34654	1.21444	0.840135
ST130	89.63	29.45	Monzonite		60.89	0.8	18.65	5.47	0.08	1.22	3.31	3.99	5.26	0.2		99.87	30.6873	3.0307	1.01908	151	906	16.5	2.58	18.5	1	39.2	86.9	14.6	10.3	381	41.5	8.35	667	15.2	1.67	6.87	1.09	6.02	35	1.2	3.42	0.51	3.34	0.52	10.8857	11.7365	8.41861	1.20633	0.674091
ST132A	89.63	29.5	Tonalite		63.49	0.5	16.68	5.57	0.13	2.19	5.58	3.16	1.51	0.11		98.92	43.8354	1.74436	0.981131	34.1	522	3.6	0.87	3.39	0.31	7.89	18.6	7.95	2.49	412	11.4	2.92	112	3.19	0.86	3.1	0.54	3.36	23	0.73	2.23	0.36	2.43	0.4	17.913	3.24691	2.32901	0.92544	0.873876
ST135	89.62	29.54	Granodiorite		66.01	0.66	15.48	4.93	0.08	1.84	3.58	2.9	3.97	0.13		99.56	42.5576	3.48226	0.992336	130	519	12.4	2.98	7.21	0.56	21.9	46.2	19.1	5.31	553	20.9	4.06	231	6.29	0.86	3.48	0.57	3.29	20.8	0.66	1.95	0.31	1.98	0.31	26.5865	11.0606	7.93377	1.11211	0.699471
ST139A	89.63	29.5	Diorite		55.25	0.88	19.44	8.63	0.13	3.38	5.36	3.4	1.8	0.19		98.44	43.74	2.6197	1.12308	38.8	275	2.94	0.58	3.96	0.32	16.8	30	7.84	4.16	423	17.7	4.14	173	4.25	1.11	4	0.71	4.5	27.9	0.94	2.71	0.42	2.6	0.41	15.1613	6.46154	4.63486	1.15839	0.833905
ST141A	89.09	29.4	Gabbro	90.5	50.61	1.05	18.44	9.5	0.16	5.01	8.13	3.18	2.05	0.25		98.38	51.1446	2.85768	0.828232	72.7	463	3.69	0.94	4.64	0.3	19.3	39.4	9.15	4.66	613	20	4.36	107	2.78	1.35	4.02	0.63	3.52	19.5	0.7	1.94	0.29	1.75	0.27	31.4359	11.0286	7.91079	1.34623	0.985828
ST142A	89.69	29.36	Granodiorite		62.28	0.75	16.78	5.85	0.1	2.36	5.22	3.3	2.55	0.17		99.35	44.4695	3.28623	0.947813	68.7	469	6.39	1.04	4.97	0.38	19.7	40.4	14.8	4.66	435	18.9	3.87	154	4.27	1	3.38	0.54	2.98	17.8	0.59	1.65	0.25	1.61	0.26	24.4382	12.236	8.7769	1.23881	0.845298
ST143A	89.81	29.31	Gabbro	84.8	57.56	0.86	18.07	7.71	0.13	3.44	6.64	3.29	2.05	0.19		99.94	46.9688	2.95027	0.915802	69.2	310	9.01	1.87	5.03	0.35	18.6	39.3	11.2	4.62	493	19.2	4.07	71.6	2.18	1.01	3.56	0.56	3.2	19.6	0.64	1.83	0.28	1.8	0.28	25.1531	10.3333	7.4121	1.18985	0.81119
ST144A	89.94	29.32	Monzodiorite	85.2	59.26	0.76	17.91	7.03	0.12	2.6	5.77	3.63	2.26	0.19		99.53	42.3353	2.77711	0.945921	61.9	384	5.04	0.88	5.06	0.37	19.1	41	14.2	4.94	442	20.8	4.44	148	4.11	1.17	3.91	0.62	3.47	19.8	0.69	1.94	0.3	1.91	0.3	22.3232	10	7.173	1.21594	0.858479
ST145	90.07	29.35	Gabbro		55.13	0.77	20.81	7.25	0.14	3.02	8.01	3.76	1.37	0.31		100.57	45.2619	2.61626	0.934775	40.8	246	2.75	0.87	5.26	0.28	23.1	53.9	11.7	6.46	668	27.6	5.7	98.9	2.63	1.29	4.92	0.77	4.25	26.5	0.86	2.44	0.36	2.29	0.35	25.2075	10.0873	7.23564	1.24213	0.744721
ST146A	90.19	29.35	Granodiorite		74.73	0.2	14.2	1.55	0.05	0.41	2.03	3.34	3.2	0.03		99.72	34.4297	5.10036	1.12123	66.1	517	7.5	0.83	2.21	0.17	14.3	26.2	8.75	2.67	344	9.66	1.81	72.9	2.05	0.49	1.61	0.27	1.61	10.7	0.34	1.05	0.16	1.1	0.17	32.1495	13	9.32489	0.979599	0.877541
ST149	90.34	29.31	Monzodiorite		58.04	1	16.96	8.18	0.14	2.66	6.03	3.23	2.73	0.33		99.29	39.2285	2.68475	0.880608	75.5	452	6.14	1.9	8.38	0.6	26.2	57	16.6	6.8	728	28.9	6.3	339	8.22	1.27	5.79	0.94	5.36	33.5	1.09	3.1	0.48	2.99	0.46	21.7313	8.76254	6.28537	1.1998	0.642862
ST150A	90.38	29.29	Monzodiorite		58.2	0.93	17.87	7.68	0.14	2.59	6.19	3.33	2.6	0.22		99.74	40.0997	2.68016	0.912931	88.1	348	7.41	2.97	7.44	0.51	23	50.2	14.8	6.04	730	25.5	5.54	180	4.72	1.2	5.1	0.83	4.86	30.4	1	2.84	0.44	2.86	0.44	24.0132	8.04196	5.76849	1.13733	0.690184
T020A	93.93	29.15	Diorite		52.51	0.83	19.38	8.56	0.14	3.82	8	4.04	0.93	0.2		98.41	46.9737	2.5086	0.871911	15.8	270	1.01	0.26	2.92	0.18	14.3	29.7	11.6	3.72	666	16.5	3.68	32	0.92	1.1	3.51	0.51	3.1	17.7	0.61	1.72	0.24	1.59	0.23	37.6271	8.99371	6.45118	1.30491	0.935705
T021A	93.91	29.15	Diorite		57.67	0.66	17.7	6.55	0.11	3.01	6.39	3.44	1.86	0.17		97.56	47.7047	2.84213	0.916311	54	455	1.96	0.55	2.99	0.16	14	28.2	20	3.37	548	14.6	3.18	126	3.31	0.92	2.97	0.43	2.65	15.6	0.54	1.5	0.22	1.38	0.21	35.1282	10.1449	7.27695	1.28523	0.915208
T021B	93.91	29.15	Diorite		56.42	0.81	17.42	7.43	0.12	3.48	6.69	3.38	1.65	0.19		97.59	48.1797	2.71206	0.891668	48.6	418	2.11	0.55	3.58	0.2	16.3	33.9	12.9	4.17	544	18	3.88	120	3.04	1.07	3.53	0.53	3.15	18.5	0.64	1.8	0.26	1.69	0.26	29.4054	9.64497	6.91833	1.2475	0.883902
T022	93.85	29.13	Gabbro		55.1	0.78	18.4	7.7	0.12	3.49	6.97	3.5	1.34	0.19		97.58	47.3607	2.69965	0.924276	34	353	2.35	0.66	3.12	0.21	13.8	29.1	30.8	3.45	603	15	3.3	112	3	1.01	3	0.48	2.73	15.8	0.53	1.5	0.23	1.43	0.23	38.1646	9.65035	6.92219	1.27774	0.981358
T024	93.75	29.14	Tonalite	80.4	69.53	0.26	17.65	2.22	0.07	0.58	3.54	4.41	1.73	0.1		100.09	34.1507	5.93765	1.13284	40.9	461	2.38	0.41	4.05	0.18	14.9	27.3	16.9	2.9	738	10.2	1.62	139	3.63	0.52	1.27	0.15	0.82	4.98	0.16	0.45	0.06	0.45	0.07	148.193	33.1111	23.7506	1.2196	1.10833
T025	93.61	29.17	Granodiorite		68.55	0.23	16.89	2.16	0.05	0.57	3.28	4.4	2.02	0.08		98.22	34.3761	4.32706	1.0964	38.9	572	1.28	0.51	2.81	0.11	4.96	9.07	17.1	0.96	690	3.73	0.74	117	3	0.58	0.72	0.11	0.63	4	0.13	0.37	0.06	0.38	0.07	172.5	13.0526	9.36265	1.10961	2.42923
T026	93.45	29.12	Granodiorite		70.11	0.16	15.95	1.41	0.04	0.32	2.61	4.38	2.2	0.04		97.22	31.0587	6.55463	1.11173	53.3	619	6.69	0.83	3.07	0.24	26.5	49.2	17.8	5.04	626	17.6	2.61	135	3.44	0.68	1.91	0.27	1.31	9.07	0.27	0.84	0.14	0.95	0.16	69.0187	27.8947	20.0089	0.922918	0.931098
T027	93.32	29	Tonalite	82.7	66.45	0.36	16.57	2.87	0.09	0.83	3.83	4.13	1.84	0.14		97.11	36.4707	4.70674	1.05092	41.3	407	3.45	0.87	4.95	0.36	18.3	35.4	12.4	3.95	622	14.4	2.51	106	2.98	0.81	2.02	0.28	1.54	9.3	0.3	0.87	0.13	0.94	0.15	66.8817	19.4681	13.9644	1.0965	1.09976
T028	93.16	29.04	Granodiorite		64.71	0.54	15.87	4.15	0.06	1.83	3.73	3.06	3.85	0.13		97.93	46.6763	3.10192	0.991517	198	467	29.7	3.51	8.66	0.93	23.4	51.8	23	6.48	401	25.6	4.87	266	6.71	0.82	3.83	0.61	3.52	22.3	0.69	2.03	0.31	2.01	0.31	17.9821	11.6418	8.35065	1.17209	0.580462
T035B	90.39	29.29	Gabbro		44.03	1.55	19.52	12.32	0.19	5.16	11.33	2.35	0.44	0.59		97.48	45.3971	1.38873	0.781414	8.6	115	0.5	0.16	1.64	0.09	11.1	28	0.16	4.04	747	20.4	5.16	22.3	0.73	1.74	5.1	0.79	4.59	26.3	0.89	2.48	0.35	2.09	0.31	28.403	5.311	3.80958	1.46988	1.03696
T036A	90.31	29.32	Gabbro	102.2	42.89	1.32	18.52	14.44	0.18	6.08	10.1	2.27	0.79	0.19		96.78	45.5283	1.45605	0.805631	17.4	209	0.71	0.35	1.86	0.14	7.24	17.3	1.04	2.46	725	12.7	3.21	51.1	1.56	0.98	3.26	0.49	3	17.7	0.62	1.69	0.24	1.51	0.23	40.9605	4.7947	3.43924	1.32972	0.926165
T036B	90.31	29.32	Gabbro	102.2	47.37	1.12	11.4	12.11	0.22	10.18	12.77	1.46	0.62	0.12		97.37	62.5285	1.14896	0.432895	9.02	259	1.03	0.39	1.55	0.11	5.98	14.9	3	2.2	349	11.6	3.36	57.5	1.72	0.98	3.51	0.6	3.75	22.4	0.79	2.16	0.3	1.96	0.29	15.5804	3.05102	2.1885	1.28053	0.872422
T036C	90.31	29.32	Monzonite	102.2	56.6	0.67	16.34	7.88	0.19	2.87	5.72	3.34	4.15	0.31		98.07	41.9612	3.85371	0.800329	130	631	13.1	4.22	11.7	0.6	39.1	75.3	13.6	8.24	622	32.7	6.55	158	3.52	1.18	5.84	0.86	4.76	29.9	0.96	2.74	0.41	2.77	0.43	20.8027	14.1155	10.1251	1.15012	0.583282
T037	89.99	29.34	Diorite		56.07	0.74	18.52	7.88	0.14	2.9	6.7	3.56	1.69	0.22		98.42	42.2147	2.33772	0.930926	36.9	448	4.23	0.77	3.69	0.24	13	28.1	13.5	3.54	691	15.9	3.59	147	3.5	0.99	3.42	0.51	3.09	19.8	0.62	1.81	0.27	1.75	0.27	34.899	7.42857	5.32851	1.18178	0.863771
T107A	89.62	29.54	Monzodiorite		58.82	0.83	17.1	6.72	0.12	2.65	5.46	3.52	2.74	0.22		98.18	43.9084	3.20002	0.913991	106	709	7.12	2.64	8.84	0.61	23	47.8	21.8	5.42	557	22.6	4.64	192	4.66	1.11	3.99	0.67	4.02	25.5	0.79	2.31	0.36	2.34	0.36	21.8431	9.82906	7.05038	1.14981	0.788681
T107B	89.62	29.54	Diorite		55.51	0.89	18.55	8.79	0.16	3.44	7.63	3.73	1.44	0.37		100.51	43.721	2.79199	0.858935	69.4	524	6.21	2.11	8.09	0.58	22.1	47.2	19.9	5.49	567	23.5	5.11	147	3.77	1.09	4.33	0.76	4.6	28.5	0.91	2.64	0.41	2.73	0.42	19.8947	8.09524	5.80671	1.12774	0.708428
T108A	89.63	29.39	Gabbro		49.04	1.14	18.32	11.05	0.24	4.47	9.02	3.52	0.86	0.34		98	44.5371	2.33793	0.791243	26.2	196	1.18	0.44	3.39	0.2	15.5	34.2	4.96	4.28	911	19.4	4.28	29.3	0.94	1.5	4.12	0.61	3.43	19.5	0.67	1.91	0.27	1.68	0.26	46.7179	9.22619	6.61794	1.36647	1.09205
T108B	89.63	29.39	Diorite		55.51	0.89	18.55	8.79	0.16	3.44	7.63	3.73	1.44	0.37		100.51	43.721	2.69098	0.858935	42	294	4.24	1.1	6.21	0.35	20.3	43.9	4.51	5.27	806	23	4.87	79.1	2.07	1.36	4.44	0.67	3.66	22.5	0.75	2.09	0.31	2.01	0.3	35.8222	10.0995	7.24437	1.21871	0.894142
T212	93.31	29	Granodiorite		65.93	0.36	16.56	3.16	0.07	0.95	3.35	3.68	2.97	0.13		97.16	37.3737	4.58077	1.07681	90.3	492	6.95	1.79	5.22	0.42	21.5	36.3	13.7	4.53	622	16.8	3.03	120	3.23	0.81	2.3	0.33	1.69	9.92	0.31	0.86	0.13	0.79	0.13	62.7016	27.2152	19.5214	1.43178	0.938044
T213	93.34	29.04	Tonalite		65.07	0.36	18.04	3.43	0.11	1	4.4	4.18	2.12	0.14		98.84	36.6581	3.90232	1.04936	45.1	479	5.29	1.6	3.73	0.33	16.2	27.5	16.2	3.6	688	13.9	2.68	102	2.87	0.79	2.15	0.33	1.88	11.6	0.36	1.05	0.17	1.11	0.18	59.3103	14.5946	10.4687	1.13357	1.00615
T215	93.41	29.1	Granodiorite		68.28	0.24	17.2	2.14	0.06	0.49	3.21	4.48	2.09	0.06		98.26	31.2489	6.85725	1.11075	54.5	534	4.06	0.54	3.31	0.27	22.2	35.4	16.5	4.17	757	14.5	2.09	137	3.48	0.68	1.5	0.17	0.85	6.8	0.18	0.63	0.11	0.72	0.11	111.324	30.8333	22.1167	0.790136	1.17412
T216A	93.61	29.17	Tonalite		67.89	0.3	17.04	2.52	0.05	0.61	3.44	4.46	1.82	0.08		98.21	32.4557	6.13725	1.09385	35.9	462	4.03	0.38	2.97	0.14	21.2	33.7	14.9	4.06	768	14.4	2.23	139	3.43	0.71	1.56	0.19	0.81	4.05	0.14	0.38	0.05	0.36	0.06	189.63	58.8889	42.241	1.50591	1.16377
T217	93.64	29.14	Granodiorite		68.78	0.23	17.59	1.83	0.06	0.44	3.32	4.46	2.1	0.06		98.87	32.3081	5.83095	1.12301	49.9	534	4.21	0.57	3.46	0.2	19.6	31.3	18.7	3.77	780	13.3	2.17	122	3.12	0.67	1.66	0.23	1.2	7.08	0.22	0.62	0.09	0.59	0.1	110.169	33.2203	23.8289	1.36127	1.07923
T218B	93.75	29.14	Granodiorite		67.79	0.29	16.96	2.5	0.06	0.63	3.45	4.26	2.15	0.09		98.18	33.3438	5.34674	1.08542	42.6	600	1.84	0.38	2.79	0.1	13.5	21.7	14.5	2.61	719	9.44	1.63	117	2.89	0.66	1.31	0.18	0.89	5	0.16	0.43	0.06	0.38	0.06	143.8	35.5263	25.483	1.56755	1.38082
T321	90.4	29.26	Gabbroic diorite	90.8	53.8	1.06	17.16	2.05	0.16	4.26	7.91	2.83	1.82	0.24	0.7		80.488	2.06582	0.815659	48.3	262	5.24	1.57	5.85	0.39	16.8	39	15.5	5.25	519	22.3	5.25	79	2.64	1.28	4.72	0.76	4.59	26.2	0.96	2.68	0.41	2.61	0.42	19.8092	6.43678	4.6171	1.17703	0.786109
T323	90.4	29.26	Gabbroic diorite	90.8	52.05	1.23	15.7	3.45	0.24	5.45	7.89	2.62	1.32	0.3	0.28		75.821	1.92914	0.780561	19.4	290	1.28	0.39	5.41	0.33	15.3	35.6	17.1	4.89	502	21.4	5.12	38.2	1.32	1.27	4.82	0.77	4.73	27.2	0.99	2.77	0.43	2.86	0.45	18.4559	5.34965	3.8373	1.1069	0.781572
T367	90.28	29.47	Granodiorite	87.7	64.7	0.58	16.15	4.64	0.07	1.92	3.98	3.68	3.49	0.17	0.25		45.0973	3.52446	0.944969	136	596	14	2.61	7.01	0.66	20.2	42.5	15.1	5.1	528	19.1	3.7	96.5	2.96	0.86	2.74	0.39	2.19	12.2	0.41	1.1	0.19	1.04	0.16	43.2787	19.4231	13.9322	1.40937	0.825745
T368	90.28	29.47	Granodiorite	87.7	63.64	0.63	16.28	5.08	0.07	2.21	4.34	3.73	3.4	0.18	0.33		46.3398	3.31061	0.918176	127	638	12.6	2.05	7.24	0.64	20	45.1	13.5	5.24	569	19.8	3.9	103	3.01	0.9	2.88	0.42	2.24	12.4	0.43	1.17	0.19	1.13	0.18	45.8871	17.6991	12.6956	1.32674	0.820989
T369	90.28	29.47	Granodiorite	87.7	66.89	0.54	15.44	3.94	0.05	1.63	3.35	3.8	3.39	0.15	0.36		45.0921	4.20509	0.963079	116	537	7.13	2.45	7.44	0.96	21.3	47.1	11.5	5.08	503	18.2	3.27	103	3.2	0.76	2.47	0.35	1.85	10.7	0.35	0.99	0.15	0.94	0.16	47.0093	22.6596	16.2537	1.31722	0.817551
T370	90.28	29.47	Diorite	88.4	56.38	0.83	17.97	7.72	0.12	3.58	6.73	3.76	1.82	0.28	0.38		47.9311	2.99087	0.880066	49.6	458	7.58	1.58	5.89	0.44	18.3	39.2	7.74	4.93	713	19.7	3.95	54.2	1.56	1.17	3.09	0.45	2.47	13.6	0.47	1.28	0.19	1.15	0.19	52.4265	15.913	11.4144	1.43752	1.02384
T371	90.28	29.47	Diorite	88.4	58.76	0.77	16.95	6.79	0.1	3.18	5.83	3.74	2.65	0.25	0.49		48.1778	3.10398	0.862711	94.3	478	11.4	3.43	7.94	0.65	21.3	47.8	9.48	5.63	602	22.2	4.43	92.3	2.72	1.16	3.45	0.5	2.77	16.1	0.52	1.41	0.22	1.34	0.23	37.3913	15.8955	11.4019	1.38354	0.907131
T372	90.28	29.47	Diorite	88.4	57.39	0.84	17.66	7.32	0.11	3.29	6.3	3.82	2.13	0.26	0.41		47.1513	3.05632	0.879886	97.3	430	9.8	2.55	7.18	0.53	19.6	43.1	12.6	5.15	641	20	4.14	47.9	1.58	1.2	3.29	0.48	2.73	14.9	0.52	1.46	0.2	1.29	0.21	43.0201	15.1938	10.8985	1.41641	0.994047
T433	89.1	29.42	Gabbro	94	51.19	1.13	17.9	3.35	0.17	4.54	8.2	3.81	1.41	0.35	1.48		72.9012	2.4055	0.787375	39.9	389	4.5	1.38	6.75	0.36	21.5	50.1	16.6	6.18	744	26.3	5.77	71.1	2.11	1.68	4.77	0.75	4.33	22.3	0.72	2.35	0.3	2.12	0.31	33.3632	10.1415	7.2745	1.367	0.979007
T435	89.1	29.42	Gabbroic diorite	90.8	55.27	0.95	17.81	3.49	0.17	3.79	7.51	3.64	1.32	0.32	0.44		68.3113	2.83998	0.84409	36.3	457	5.2	1.34	5.68	0.33	21.6	47.8	12.8	5.72	787	23.4	4.91	53.6	1.64	1.51	4.25	0.63	3.67	19.6	0.64	2	0.28	1.9	0.3	40.1531	11.3684	8.15456	1.29279	1.01057
T438	89.1	29.42	Gabbroic diorite	90.8	53.37	0.95	18.02	2.21	0.15	5.01	8.49	3.23	1.48	0.21	0.18		81.8184	2.89744	0.805048	28.1	417	2.96	0.75	3.7	0.22	17.1	36.7	8.67	4.38	862	17.4	3.81	61	1.78	1.34	3.24	0.48	2.74	14.8	0.48	1.55	0.22	1.51	0.23	58.2432	11.3245	8.12306	1.21448	1.16599
6_1	93.7	29.15	Charnockite		56.44	0.59	17.44	7.87778	0.13	3.87	7.26	3.71	1.22	0.26		106.081	49.3715	2.63338	0.844513	31.4	291.9	2.03	0.56	2.37	0.15	15.46	29.83	10.63	4.16	607.3	17.31	3.79	85.1	5.1	1.11	3.23	0.52	2.84	14.95	0.61	1.54	0.24	1.51	0.22	40.6221	10.2384	7.34401	1.2588	0.969897
7_1	93.7	29.15	Charnockite	89.5	54.06	0.65	18.94	8.51667	0.14	4.22	7.71	4.23	0.8	0.25		107.391	49.5865	2.44545	0.866013	10.9	226.2	2.02	0.54	3.86	0.28	13.94	28.63	10.18	3.98	610.7	16.76	3.68	109.6	5.77	1.11	3.24	0.57	2.79	16.28	0.61	1.62	0.25	1.61	0.24	37.5123	8.65839	6.21066	1.15983	0.982766
8_1	93.7	29.15	Charnockite	86.6	61.84	0.63	16.2	6.24778	0.09	2.98	5.18	3.53	2.46	0.17		105.102	48.634	2.61904	0.904433	65.1	526.1	1.4	0.41	4.07	0.26	11.4	23.97	14.11	3.09	439.8	12.95	2.81	114.2	7.01	0.87	2.36	0.44	2.26	12.51	0.48	1.32	0.18	1.19	0.19	35.1559	9.57983	6.87161	1.27109	1.03284
8_2	93.7	29.15	Charnockite	87.8	61.62	0.59	16.37	6.27444	0.1	2.97	5.53	3.64	2.36	0.16		105.412	48.4437	2.78011	0.87908	57.7	427.9	1.43	0.38	3.76	0.23	13.35	26.16	13.96	3.48	419.6	14.15	3.1	105.4	6.76	0.92	2.61	0.45	2.47	13.46	0.53	1.37	0.23	1.43	0.21	31.1738	9.33566	6.69647	1.15605	0.988804
8_3	93.7	29.15	Charnockite		55.22	0.75	17.88	8.37778	0.13	4.03	7.33	3.87	1.33	0.25		106.911	48.846	2.86037	0.844949	37.2	282.6	3.8	1.1	3.68	0.24	14.4	27.5	10.54	3.63	528.9	14.96	3.25	88.2	4.27	1.03	2.7	0.48	2.56	14.3	0.55	1.47	0.22	1.32	0.21	36.986	10.9091	7.82509	1.29802	1.06301
8_4	93.7	29.15	Charnockite	86	55.32	0.68	18.52	8.23333	0.14	3.82	7.06	4.6	1.26	0.23		107.469	47.9439	2.45662	0.849765	22.3	331.2	2.02	0.47	3.64	0.22	15.64	32.3	11.66	4.71	619.4	19.36	4.11	119.3	7.13	1.23	3.45	0.62	3.24	17.23	0.7	1.7	0.29	1.75	0.26	35.9489	8.93714	6.41061	1.23915	0.998615
9_1	93.7	29.15	Charnockite		59.64	0.64	16.96	7.04556	0.11	3.22	6.17	3.66	1.61	0.2		105.763	47.5678	2.89131	0.892325	41.8	350.7	1.23	0.31	3.32	0.23	13.66	26.85	12.33	3.67	487.7	14.98	3.05	93.1	5.15	1.03	2.68	0.48	2.58	14.57	0.58	1.49	0.23	1.48	0.23	33.4729	9.22973	6.62048	1.16674	1.1014
10_1	93.7	29.15	Charnockite		55.62	0.65	18.03	8.14111	0.14	3.76	7.11	3.83	1.33	0.19		106.322	47.8299	2.70928	0.871245	26.5	270.5	1.99	0.59	2.73	0.21	12.8	25.21	11.23	3.44	424.1	15.04	3.05	69.8	4.93	1.01	2.87	0.53	2.66	15.59	0.58	1.69	0.27	1.73	0.28	27.2033	7.39884	5.30719	1.02908	1.04365
43_1	93.7	29.15	Charnockite	87.1	58.36	0.69	17.51	6.93444	0.11	3.46	6.43	3.95	1.96	0.19		106.007	49.7604	2.98444	0.860993	51	357	2.7	0.5	3.45	0.19	14.1	28.6	10.8	3.58	531	14.1	3.05	123	1.47	0.91	3.47	0.51	2.91	15.5	0.56	1.54	0.22	1.36	0.21	34.2581	10.3676	7.43671	1.43209	0.855166
43_4	93.7	29.15	Charnockite		62.73	0.47	15.93	5.49333	0.1	2.8	5.24	3.87	1.48	0.14		103.334	50.2933	2.77435	0.909401	34	319	1.09	0.26	2.19	0.28	10.4	20.2	9.37	2.61	487	10.3	2.42	66	0.86	0.82	2.74	0.41	2.42	11.3	0.48	1.3	0.19	1.18	0.18	43.0973	8.81356	6.32196	1.37261	0.973542
43_8	93.7	29.15	Charnockite	88.3	58.57	0.64	17.3	6.69667	0.12	3.65	6.24	3.87	1.53	0.17		104.987	51.9681	2.56459	0.892088	34	407	1.63	0.48	2.84	0.22	11.6	25.5	11.2	3.13	454	12.8	2.92	115	2.59	0.86	2.67	0.41	2.43	15.1	0.49	1.4	0.21	1.36	0.22	30.0662	8.52941	6.11814	1.19587	0.941619
12FW149	89.11	29.13	Rodingite	126	43.93	0.09	15	4.3	0.12	12.98	17.52	0.18	0.05	0.02	5.51	99.7	85.6982	0.454398	0.464946	0.60512	8.29487	0.00731626	0.0057948	0.0920012	0.0354646	0.311439	0.991573	0.289421	0.189958	23.7356	1.11995	0.442466	4.38968	0.153484	0.35985	0.665396	0.128874	0.967079	6.14016	0.227122	0.651937	0.0939959	0.640393	0.094525	3.86564	0.486325	0.348841	1.01072	2.02752
12FW150	89.09	29.14	Gabbro		46.05	0.86	15.8	9.15	0.15	9.42	13.41	1.24	0.49	0.08	3.38	100.03	67.1446	0.373289	0.585249	4.44889	86.344	0.00287799	0.00128609	0.592259	0.0856937	1.29687	5.19126	0.339146	1.01302	226.908	6.30017	2.24282	34.8459	1.06344	0.866199	3.23707	0.559465	4.9349	24.7827	0.943218	2.63348	0.394422	2.56611	0.383604	9.15589	0.505382	0.36251	1.28712	0.982807
12FW152	89.09	29.14	Gabbro	124.8	46.65	0.58	17.87	9.64	0.14	8.58	9.63	2.56	0.25	0.06	3.68	99.64	63.857	0.384275	0.811415	3.06885	67.6534	0.00264863	0.000512977	0.376172	0.0532829	0.715488	2.67286	0.285075	0.51702	539.393	3.21589	1.202	17.4324	0.570864	0.561504	1.81146	0.331751	2.98233	16.1257	0.597231	1.76797	0.270137	1.82308	0.292633	33.4493	0.392462	0.281513	1.09488	1.16335
12FW153	89.07	29.13	Gabbro		55.06	0.36	12.94	7.69	0.13	9.36	8.04	4.28	0.03	0.03	2	99.92	70.7272	0.533246	0.595816	0.0842845	5.25749	0.0119428	0.00948744	0.275003	0.0495512	0.700496	2.42404	0.419179	0.41333	47.1849	2.37268	0.848049	26.5819	0.74102	0.355217	1.31091	0.243326	2.21924	12.0038	0.443103	1.30813	0.201206	1.37776	0.222601	3.93083	0.50843	0.364696	1.07807	1.02996
12FW155	89.07	29.13	Gabbro		47.72	1.05	18.01	10.72	0.15	6.88	9.96	2.99	0.11	0.08	2.62	100.29	56.0245	0.363507	0.776969	0.692455	3.67186	0.0534028	0.0278935	0.620596	0.0680807	1.17414	4.09676	0.561624	0.783287	147.061	5.01414	2.08521	28.5666	0.890476	0.766776	3.21464	0.595776	5.21293	26.1582	1.01986	2.81362	0.409167	2.62478	0.394376	5.62201	0.447329	0.320869	1.32924	0.905422
12FW156	89.07	29.13	Plagiogranite	125.1	71.02	0.52	13.46	3.26	0.06	1.83	3.62	4.07	0.18	0.08	1.48	99.58	52.7033	0.771716	0.998169	1.52649	7.03093	0.0244524	0.0164698	0.475986	0.0519987	1.06707	2.8771	0.470858	0.445915	200.601	2.45802	0.892645	63.5133	1.42365	0.529333	1.22651	0.231452	1.63349	10.259	0.369082	1.05241	0.16212	0.984479	0.157902	19.5536	1.0839	0.777477	1.11052	1.5466
12FW159	89.07	29.13	Plagiogranite	127.2	76.15	0.16	11.86	2.64	0.03	1.21	1.28	5.43	0.03	0.03	1.18	100	47.639	0.892012	1.04982	0.0763196	3.06496	0.193894	0.124738	0.61168	0.0646651	3.14306	8.08833	2.94687	1.16568	29.2426	6.0086	2.27471	70.4201	1.98807	0.607487	3.63317	0.825421	6.20675	47.1415	1.6012	4.76915	0.786951	4.82628	0.789088	0.620316	0.65124	0.467134	0.860731	0.646033
12FW160	89.09	29.14	Plagiogranite		63.1	0.18	18.87	3.84	0.02	1.74	0.97	9.55	0.06	0.03	1.68	100.04	47.354	0.815728	1.07563	0.119969	12.4843	0.600882	0.445589	2.39772	0.250865	9.33972	25.7073	1.301	3.93357	60.5465	20.475	7.39149	262.33	7.62578	0.634282	8.69725	1.80751	12.2052	68.8016	2.8111	8.38573	1.50241	10.0326	1.66523	0.880016	0.930935	0.66776	0.81423	0.241852
12FW161	89.07	29.14	Gabbro		52.16	0.42	14.47	8.53	0.14	9.96	7.46	3.65	0.09	0.04	2.7	99.62	69.8599	0.585597	0.734878	0.635577	5.2728	0.0374738	0.0213935	0.261657	0.0890415	0.759928	2.30817	0.241583	0.388185	200.095	2.2197	0.837755	19.4685	0.562336	0.405193	1.28925	0.244257	2.26178	12.6576	0.446607	1.31431	0.197148	1.3351	0.209946	15.8083	0.569192	0.408281	1.13384	1.19195
12FW163	89.11	29.13	Rodingite		43.58	0.05	19.4	2.9	0.05	6.27	21.56	0.12	0.01	0.01	5.16	99.11	81.103	1.00176	0.49141	0.0355651	0.32348	0.00441943	0.00132255	0.0273386	0.0429827	0.123503	0.279071	0.510624	0.0409656	9.48336	0.192482	0.0795897	1.92192	0.0451953	0.109261	0.131431	0.0243693	0.254931	1.50672	0.0519926	0.169549	0.029686	0.221687	0.0358795	6.29403	0.557105	0.399611	0.769655	3.26598
13DJ22	89.1	29.2	Basalt		51.76	1.63	14.4	12.35	0.18	5.6	6.11	4.89	0.25	0.15	3.32	100.64	47.3714	0.558204	0.740549	1.0881	5.48164	0.108549	0.0525154	1.37448	0.125904	3.1559	10.7455	1.26773	1.8352	104.777	10.3804	3.64984	118.025	2.60577	1.3177	4.95797	0.860892	6.00136	36.2694	1.38929	3.84861	0.56795	3.7111	0.55344	2.88885	0.850395	0.609988	1.08234	0.947
13DJ23	89.1	29.2	Basalt		57.33	1.11	14.76	10.3	0.14	3.1	6.09	4.74	0.03	0.1	3.43656	101.137	37.4	0.580794	0.779998	0.0804313	2.83831	0.0974458	0.0567088	0.79197	0.0721367	2.11379	6.88824	0.844214	1.15732	28.6722	6.49138	2.34954	81.3308	1.85404	0.883582	3.33631	0.599436	4.36302	27.2016	1.02999	2.91543	0.441452	2.97337	0.459254	1.05406	0.710907	0.509933	0.982094	0.964819
13DJ24	89.1	29.2	Basalt		56.42	1.15	14.7	10.47	0.14	3.32	5.15	4.71	0.04	0.1	3.45654	99.6565	38.6298	0.588846	0.856021	0.233178	3.22965	0.106859	0.070894	0.820278	0.244455	2.21361	7.13463	0.716078	1.20069	50.741	6.77691	2.42685	86.4991	2.00781	0.886603	3.53102	0.629689	4.50333	27.9336	1.06891	2.98678	0.459554	3.04746	0.474936	1.81648	0.726378	0.521031	0.989033	0.925936
13DJ25	89.1	29.2	Basalt		55.28	1.6	13.96	10.82	0.17	5.71	4.7	5	0.09	0.12	3.85537	101.305	51.1616	0.516028	0.826809	0.516796	4.04171	0.0961362	0.0976989	0.989442	0.144678	2.45684	8.84092	0.97694	1.54507	72.8953	8.71581	3.07359	102.573	2.33173	1.13097	4.21821	0.728172	5.11249	30.9872	1.1798	3.28463	0.495777	3.19595	0.480634	2.35243	0.768734	0.551413	1.07065	0.960257
PC01	89.2	29.18	Rodingite	126.6	43.12	0.01	23.38	1.22	0.02	2.21	24.94	0.06	0.01	0.01	4.9	99.87	78.2414	1.07892	0.51344	0.144309	1.33323	0.0157818	0.00709895	0.0346553	0.0542076	0.13357	0.289074	1.25106	0.0461994	13.6306	0.241303	0.0799211	0.809026	0.0262995	0.216799	0.114836	0.0194021	0.151154	0.755101	0.0324085	0.101333	0.0183471	0.105356	0.0152941	18.0514	1.2678	0.909391	0.960231	6.91849
PC02	89.17	29.18	Rodingite		42.12	0.48	14.63	8.52	0.14	10.74	18.14	0.08	0.01	0.05	4.66	99.56	71.4473	0.461753	0.440886	0.0202583	0.904609	0.0571452	0.0297337	0.423896	0.237692	0.897012	3.15215	0.01	0.567412	5.70953	3.37732	1.2541	29.5198	1.19981	0.483418	2.02511	0.406308	2.72912	11.322	0.595789	1.83462	0.25463	1.61313	0.257598	0.504285	0.556071	0.398869	1.13232	0.927377
PC03	89.15	29.18	Rodingite	130.5	39.97	0.625	17.74	3.735	0.035	10.56	20.92	0.12	0.01	0.025	6.35	100.08	84.8769	0.449403	0.463034	0.315067	2.16746	0.0333061	0.0358872	0.299569	0.0741463	0.909286	3.44805	1.24691	0.584183	14.1924	3.43149	1.30619	10.9863	0.486034	0.524193	1.49115	0.287519	2.07636	12.7785	0.478508	1.23952	0.220729	1.43086	0.222813	1.11065	0.635483	0.455831	0.971229	1.14829
PC04	89.15	29.18	Rodingite		41.75	0.96	16.99	1.74	0.03	5.85	28.62	0.1	0.01	0.07	3.48	99.59	86.9688	0.30852	0.324828	0.104007	1.39438	0.0528252	0.0360368	0.961546	0.341992	0.972789	3.70562	0.119021	0.715283	9.36796	4.41053	2.03553	16.1838	0.635711	0.694946	3.18992	0.647611	4.65908	29.1883	1.07995	3.15303	0.467605	3.05248	0.429233	0.320949	0.318688	0.228595	1.02156	0.83377
PC05	89.14	29.18	Diabase		50.45	1.04	14.94	9.54	0.14	9	7.04	3.9	0.12	0.09	3.51508	99.7751	65.1895	0.523041	0.771328	0.790502	2.64745	0.0708012	0.0342275	0.657204	0.100552	2.03037	6.66178	1.40287	1.11348	164.313	6.53429	2.50601	64.9357	2.34066	0.936777	2.98896	0.601706	4.30644	26.5393	0.947068	2.42883	0.41634	2.64049	0.418324	6.1913	0.768938	0.551559	1.09156	1.04643
PC06	89.15	29.18	Plagiogranite	129.8	59.74	0.65	14.77	8.9	0.14	3.4	3.91	6.6	0.58	0.07	0.759392	99.5194	43.1281	0.530955	0.793693	5.61846	13.9226	0.0858973	0.0470581	0.506693	0.0768642	1.54772	4.75905	1.46071	0.762694	148.39	4.39579	1.88182	23.7712	0.966251	0.499687	2.44215	0.524735	3.91094	26.1399	0.922418	2.45655	0.44928	2.9324	0.481075	5.67677	0.5278	0.378591	0.892633	0.712601
PC07	89.15	29.18	Plagiogranite		60.24	0.61	14.24	9.18	0.14	3.16	3.89	6.98	0.31	0.06	0.35964	99.1696	40.5933	0.552339	0.753241	3.26275	3.5186	0.0517189	0.0354648	0.418809	0.0588749	1.07296	3.22982	1.45745	0.524891	86.7898	3.04307	1.25406	16.5919	0.718395	0.509953	1.68193	0.362199	2.66855	17.3263	0.627917	1.62196	0.290777	1.9331	0.309918	5.00914	0.555044	0.398133	0.923923	1.07347
PC08	89.12	29.18	Diabase		49.98	0.63	13.91	9.14	0.16	11.48	7.69	2.37	0.81	0.05	3.27738	99.4974	71.3735	0.545633	0.740494	6.53198	9.15223	0.0498884	0.0285556	0.487969	0.118979	1.22194	4.06431	1.25977	0.7137	167.056	4.06671	1.44575	39.6282	1.0268	0.570533	2.04719	0.372809	2.71448	16.1632	0.639308	1.75982	0.260632	1.72352	0.272011	10.3356	0.708979	0.508551	1.05411	1.01386
PC09	89.17	29.18	Diabase		53.38	0.99	14.52	9.12	0.15	6.42	7.94	4.54	0.05	0.09	2.35858	99.5586	58.2878	0.65443	0.660437	0.277174	2.53838	0.0924427	0.0488872	0.849244	0.156961	2.40501	7.79701	1.26134	1.33482	48.6935	7.30762	2.37245	83.043	1.92851	0.977198	3.20933	0.567065	3.97233	24.1339	0.938977	2.59128	0.40101	2.59669	0.409393	2.01764	0.926185	0.664352	1.02386	1.08268
BB-112	93.15	29	Granodiorite	103.1	59.19	0.69	17.24	7.66	0.12	3.34	5.49	3.71	1.61	0.2	1.9	108.221	46.3965	1.13439	0.965815	54.3	216	1.48	1.3	5.19	0.47	5.5	13.6	9.27	2.36	599	11.4	3.13	58	2.01	1.07	3.17	0.43	2.47	12.6	0.5	1.43	0.18	1.25	0.18	47.5397	4.4	3.15612	1.32252	1.0385
BB-113	93.15	29.1	Ggranite	76.3	73.33	0.09	15.16	1	0.07	0.39	1.7	4.22	3.61	0.04	0.74	101.272	43.6357	4.22959	1.08625	102	327	2.19	0.45	5.71	0.51	7.6	15.2	18	1.7	296	5.95	1.16	45.8	1.73	0.3	1.2	0.18	1.11	7.21	0.22	0.72	0.1	0.69	0.1	41.0541	11.0145	7.90069	1.07669	0.777366
BB-114	93.15	29.1	Ggranite	79.7	72.36	0.07	15.62	0.74	0.04	0.21	1.69	4.06	4.59	0.03	0.45	100.54	36.0339	3.40033	1.05983	152	409	4.23	0.64	4.93	0.57	6.9	12.7	31	1.6	265	5.95	1.31	51.3	2	0.5	1.21	0.18	1.1	11.2	0.22	0.66	0.09	0.58	0.09	23.6607	11.8966	8.53339	1.26935	1.21413
BB-115	93.15	29.1	Ggranite		66.65	0.3	17.56	3.06	0.09	0.84	3.93	4.57	2.52	0.15	0.94	103.422	35.2717	7.20941	1.00855	53.4	565	3.1	0.67	3.93	0.32	22	36.6	15.5	3.91	594	13.4	1.97	96.8	3.33	0.73	1.78	0.23	1.25	7.25	0.26	0.81	0.12	0.9	0.16	81.931	24.4444	17.534	0.929571	1.1918
BB-116	93.15	29.1	Ggranite	76.1	67.7	0.25	18.24	2.36	0.06	0.48	3.54	5.41	1.85	0.08	0.7	102.835	28.7618	5.8975	1.05096	39.4	398	5	0.64	3.61	0.19	24.3	42	15.6	4.98	675	17.8	2.66	136	4.13	0.76	1.82	0.22	1.08	5.58	0.21	0.67	0.09	0.7	0.12	120.968	34.7143	24.9005	1.03262	1.05599
BB-41	93.15	29	Granodiorite		62.48	0.58	16.99	5.05	0.1	2.33	5.4	3.8	1.82	0.22	1.88	105.315	47.8046	3.48216	0.940637	42.2	404	5.74	1.18	5.13	0.38	17.8	37.4	9.67	4.35	667	17	3.3	41.4	1.32	0.95	3.04	0.38	2.14	11.9	0.43	1.16	0.15	1.04	0.16	56.0504	17.1154	12.2769	1.3772	0.916967
BB-43	93.15	29	Granodiorite		61.22	0.58	17.21	5.67	0.1	2.56	5.57	4.14	1.54	0.24	1.83	105.896	47.2644	5.85361	0.923908	41.2	232	10.5	1.29	4.67	0.34	35	67	9.19	7.09	709	25.1	3.86	51.4	1.51	1.03	3.24	0.42	2.2	11.7	0.41	1.18	0.16	0.99	0.15	60.5983	35.3535	25.3591	1.48731	0.89042
BB-53	93.15	29.1	Ggranite		72.61	0.1	15.01	0.87	0.06	0.08	1.77	4.62	3.24	0.06	1.76	100.976	15.4359	4.85205	1.0467	87.3	417	3.19	1.1	5.31	0.56	11.8	20.4	25.4	2.52	423	8.81	1.57	56.5	1.99	0.37	1.37	0.18	1.1	6.46	0.2	0.57	0.08	0.54	0.08	65.4799	21.8519	15.6743	1.36337	0.771286
BB-56	93.15	29.1	Ggranite		73.03	0.04	15.59	0.33	0.02	0.07	1.85	5.3	2.93	0.04	0.71	100.213	29.6307	4.62498	1.02107	76.6	262	1.08	1.37	2.94	0.42	4.8	8	16.2	1	336	3.48	0.67	36.8	1.45	0.28	0.69	0.11	0.64	4.08	0.12	0.36	0.05	0.32	0.05	82.3529	15	10.7595	1.33858	1.25898
BB-59	93.15	29.1	Ggranite		72.01	0.14	16.01	1.2	0.05	0.12	2.27	4.72	3.54	0.04	0.86	102.058	16.5628	5.46674	1.01708	93.6	580	6.86	0.59	5.67	0.49	19.9	37.5	21.1	4.1	556	14.3	2.35	63.5	1.99	0.55	1.83	0.22	1.18	6.46	0.2	0.59	0.08	0.59	0.09	86.0681	33.7288	24.1937	1.33858	0.810824
BB-59	93.15	29.1	Ggranite		72.01	0.14	16.01	1.2	0.05	0.12	2.27	4.72	3.54	0.04	0.86	102.058	16.5628	5.46674	1.01708	93.6	580	6.86	0.59	5.67	0.49	19.9	37.5	21.1	4.1	556	14.3	2.35	63.5	1.99	0.55	1.83	0.22	1.18	6.46	0.2	0.59	0.08	0.59	0.09	86.0681	33.7288	24.1937	1.33858	0.810824
BB-61	93.15	29.1	Ggranite		71.39	0.15	16.6	1.44	0.08	0.19	2.53	5.12	2.65	0.05	0.77	102.288	20.7555	4.88636	1.04357	89.6	295	3.99	0.56	7.66	0.81	13.7	24.1	20	2.84	512	9.86	1.81	72.8	2.28	0.49	1.45	0.21	1.17	6.75	0.2	0.61	0.09	0.65	0.1	75.8519	21.0769	15.1185	1.20472	0.924691
BB-62	93.15	29.1	Ggranite		74.34	0.08	14.66	0.92	0.05	0.04	1.56	4.07	4.38	0.03	0.39	101.36	7.94499	4.2311	1.02589	116	316	5.24	1.01	5.05	0.54	9.7	17.5	25.3	2.12	278	7.52	1.48	40.1	1.53	0.4	1.41	0.21	1.27	7.92	0.25	0.72	0.11	0.74	0.12	35.101	13.1081	9.40244	1.14865	0.846532
BB-68	93.15	29.1	Ggranite		66.44	0.33	16.85	3.08	0.1	0.94	3.77	4.71	2.23	0.15	1.94	103.373	37.7269	3.78978	0.989124	42.5	564	2.08	0.55	4.24	0.29	14.5	30.5	13.2	3.57	674	13.7	2.47	74.5	2.17	0.77	2.23	0.3	1.64	9.56	0.31	0.97	0.15	0.98	0.15	70.5021	14.7959	10.6131	1.12004	1.00303
BB-70	93.15	29.1	Ggranite		68.23	0.26	17.15	2.43	0.07	0.67	3.15	4.68	3.02	0.12	0.63	102.644	35.3722	5.4889	1.02609	66.3	702	5.34	0.91	4.78	0.37	17.6	30	18.3	3.57	627	12.9	2.07	57.2	1.73	0.68	1.82	0.23	1.2	7.29	0.23	0.69	0.1	0.72	0.11	86.0082	24.4444	17.534	1.11549	1.07105
BB-72	93.15	29.1	Ggranite		67.8	0.23	17.86	2.13	0.06	0.52	3.22	5.76	2.14	0.08	0.8	102.556	32.6425	5.91522	1.01114	34.7	545	3.69	0.5	3.37	0.14	19.7	34.5	15.8	3.96	743	14	2.15	96.7	2.61	0.64	1.64	0.18	0.91	4.95	0.17	0.51	0.07	0.48	0.08	150.101	41.0417	29.4392	1.26886	1.04199
BB-74	93.15	29.1	Ggranite		69.98	0.22	16.45	1.77	0.05	0.4	3.1	4.97	2.32	0.07	0.45	101.405	30.9679	5.45455	1.00671	41.7	518	2.95	0.71	2.7	0.2	15.8	29.2	16.2	3.27	711	11.6	1.87	67.3	1.89	0.61	1.43	0.17	0.99	6.89	0.2	0.69	0.08	0.56	0.1	103.193	28.2143	20.2381	1.18321	1.14042
cb-70	93.83	29.12	Diorite		64.12	0.67	15.53	4.78	0.11	2.33	6.16	3.15	1.03	0.24	2.58	105.119	49.177	4.42719	0.88642	73.5	156	9.1	2.75	6.04	0.42	29.9	60.9	10.5	6.77	803	25	4.36	176	3.98	1.34	3.36	0.48	2.33	13.1	0.47	1.27	0.17	1.05	0.16	61.2977	28.4762	20.426	1.48519	1.07032
NR-15	93.83	29.12	Diorite		59.31	0.82	16.77	6.26	0.1	4.06	5.27	3.54	2.09	0.33	1.6	100.15	58.8	5.63	0.95	85.7	446	4.68	1.03	4.47	0.31	24.5	47.5	9.21	6.28	917	25	4.58	97.4	3	1.39	3.79	0.5	2.55	11.7	0.49	1.36	0.17	1.12	0.18	78.3761	21.875	15.6909	1.52383	1.01997
NR-16	93.83	29.12	Diorite		61.24	0.73	16.31	4.9	0.09	3.59	5.44	3.28	1.9	0.33	1.7	99.51	61.7	5.18	0.94	83.8	430	5.21	1.34	5.03	0.34	25.8	49.3	9.37	6.46	837	24.8	4.49	98.2	2.95	1.32	3.58	0.44	2.31	10.9	0.44	1.29	0.17	1.04	0.15	76.789	24.8077	17.7945	1.4866	1.00654
NR-17	93.83	29.12	Diorite	95.9	57.7	0.85	15.57	6.06	0.12	4.95	6.21	3.72	2.46	0.33	1.58	105.201	61.8533	3.10512	0.77461	84.9	457	4.74	1.1	4.75	0.73	25.3	51.9	0.98	6.6	1004	26.3	5.26	73.7	2.12	1.31	3.78	0.51	2.75	13.5	0.48	1.38	0.17	1.13	0.17	74.3704	22.3894	16.0599	1.62881	0.898165
ZK45-711	93.83	29.12	Diorite		64.39	0.61	15.69	5.21	0.09	2.16	7.17	2.05	1.08	0.22	2.16	105.637	45.1448	3.98775	0.891268	77.1	133	9.06	3.25	5.31	0.43	28.6	56.1	9.95	7.14	753	27	4.63	171	5.18	1.62	3.8	0.49	2.59	12.3	0.5	1.5	0.19	1.34	0.18	61.2195	21.3433	15.3095	1.29363	1.18075
ZK45-765	93.83	29.12	Diorite		57.77	0.81	15.41	6.6	0.15	5.09	7.17	3.26	1.41	0.34	2.93	107.087	60.4884	3.03078	0.77232	64.7	308	3.96	1.23	3.93	0.28	22.3	45.1	9.84	6.14	942	25	4.75	78.2	2.69	1.29	3.9	0.49	2.59	11.8	0.46	1.41	0.17	1.11	0.16	79.8305	20.0901	14.4106	1.56168	0.916293
ML01-1	93.3151	29.0061	Tonalite	84.2	57.46	1.01	17.31	7.61	0.12	3.39	6.33	3.52	2.85	0.38	0.03	100.01	46.9293	3.50592	0.847982	92.2775	542.171	12.6501	2.59702	11.9225	0.69167	32.048	65.0446	13.8067	7.41242	696.354	30.8351	5.90122	209.129	5.11833	1.4584	4.9821	0.708827	3.93362	21.8873	0.795357	2.12744	0.288369	1.93258	0.285422	31.8154	16.583	11.895	1.36229	0.822285
ML06-1	93.3802	29.0572	Granodiorite	79.3	74.58	0.07	14.62	1.17	0.03	0.19	0.65	3.69	4.33	0.2	0.64	100.17	24.3776	2.97177	1.22312	427.008	83.8318	6.83694	2.28364	18.5995	4.88549	8.13871	16.487	33.4276	1.81984	26.9127	7.04054	1.76801	38.4665	1.41214	0.277681	1.65889	0.305625	1.69439	9.45403	0.282207	0.661784	0.091329	0.561057	0.0723949	2.84669	14.506	10.4052	2.02126	0.4957
NML01-1	89.0945	29.4408	Diorite	87.7	57.46	1.01	17.31	7.61	0.12	3.39	6.33	3.52	2.85	0.38	0.03	100.01	46.9293	3.50592	0.847982	92.2775	542.171	12.6501	2.59702	11.9225	0.69167	32.048	65.0446	13.8067	7.41242	696.354	30.8351	5.90122	209.129	5.11833	1.4584	4.9821	0.708827	3.93362	21.8873	0.795357	2.12744	0.288369	1.93258	0.285422	31.8154	16.583	11.895	1.36229	0.822285
MM02-2	91.9755	29.2535	Andesite	136.5	56.82	0.8	15.47	4.94	0.08	5.81	10.05	3.85	1.69	0.48	2.67	107.311	70.0119	4.15105	0.584368	40.1	1158	2.45	1.32	9.58	0.49	30.8	59.6	16.1	6.87	836	26.5	4.79	125	3.25	1.69	3.33	0.44	2.41	11.5	0.43	1.19	0.16	0.97	0.14	72.6957	31.7526	22.7761	1.66288	1.29366
MM02-3	91.9755	29.2535	Andesite	136.5	55.87	0.96	18.12	6.53	0.05	5.48	5.45	4.61	2.4	0.53	1.57	107.663	62.4888	4.16497	0.90081	129	577	2.85	1.43	10.6	0.6	26	50.3	11.2	5.77	530	22.7	4.03	149	3.4	1.66	3.49	0.46	2.39	11.9	0.44	1.25	0.16	1	0.15	44.5378	26	18.6498	1.59961	1.35321
MM02-4	91.9755	29.2535	Andesite	136.5	59.86	0.88	17.57	5.01	0.06	3.51	7.62	3.3	1.87	0.3	1.47	106.108	58.1718	3.44209	0.823434	62.1	477	2.48	0.62	10.7	0.56	24.1	53.1	15.2	6.43	631	25	4.52	125	3.43	1.26	3.21	0.45	2.45	11.2	0.44	1.21	0.16	0.99	0.14	56.3393	24.3434	17.4615	1.65633	1.01128
MM02-5	91.9755	29.2535	Andesite	136.5	57.77	0.98	17.78	4.34	0.06	5.83	5.33	5.17	2.23	0.51	1.55	105.654	72.7265	3.90141	0.861706	65.4	973	3.24	1.29	10.8	0.61	22.3	44.2	11.5	5.14	692	20.1	3.69	158	3.68	1.27	3.17	0.43	2.25	11.3	0.41	1.23	0.16	0.96	0.14	61.2389	23.2292	16.6623	1.56865	1.13523
MM02-6	91.9755	29.2535	Andesite	136.5	62.98	0.95	16.61	6.07	0.07	4.41	4.18	2.56	1.92	0.26	2.22	107.877	59.0532	3.4067	1.19423	57.7	475	2.22	0.38	11	0.58	20	44.1	10.5	5.04	476	20	3.79	133	3.78	1.09	2.62	0.37	1.99	8.7	0.35	0.94	0.12	0.71	0.1	54.7126	28.169	20.2056	1.8759	1.0575
T203A	91.9755	29.2535	Andesite	136.5	58.05	1.1	18.97	5.88	0.06	4.03	6.52	2.75	2.37	0.27		105.464	57.6363	3.6578	0.999915	86.9	724	4.03	1.06	10.7	0.68	28.5	53.4	12	7.21	633	28.3	5.03	156	3.6	1.38	3.89	0.54	2.76	13.5	0.49	1.28	0.18	1.08	0.16	46.8889	26.3889	18.9287	1.71041	0.953771
Paleocene
14GT004	94.5	29.5	hornblende gabbro	50.3	47.62	1.7	20.19	10.2	0.16	3.25	8.46	3.61	2.1	0.54	0.84	98.67	42.6193	5.71	0.854529	78.9631	394.174	3.5561	1.40655	12.1408	0.717857	17.6645	48.5561	12.268	6.81939	571.671	30.9053	7.77254	141.611	3.5146	1.98789	8.05072	1.22015	7.43362	40.7704	1.45076	3.91986	0.515749	3.26871	0.453683	14.0217	5.40412	3.87637	1.52209	0.768276
14GT005	94.5	29.5	hornblende gabbro		44.85	1.44	18.68	11.25	0.17	6.02	10.51	2.65	1.14	0.37	1.14	98.22	55.5039	3.79	0.755055	24.8157	203.35	0.428437	0.33644	6.23666	0.320767	16.8812	48.8934	6.61271	6.48118	604.681	27.8725	6.08628	70.9223	2.11584	1.84603	5.47141	0.780964	4.50273	23.8801	0.83717	2.31329	0.309085	2.02972	0.283378	25.3216	8.31704	5.96581	1.48476	0.977994
14GT007	94.5	29.5	hornblende gabbro		50.26	1.34	19.35	9.63	0.14	3.61	8.29	3.73	1.47	0.35	0.64	98.81	46.634	5.2	0.847524	61.0018	297.326	4.41913	1.02902	7.52278	0.494079	27.1526	59.0243	10.7762	7.21243	608.533	29.2482	6.33447	60.3777	1.81246	1.66005	5.87649	0.915272	5.56014	30.0154	1.03433	2.89675	0.408233	2.61823	0.355605	20.274	10.3706	7.43882	1.42132	0.831822
16GT010	94.5	29.5	hornblende gabbro		46.35	1.18	19.91	12.27	0.14	4.64	9.1	3.15	1.47	0.58	0.86	99.65	46.8514	4.62	0.85259	45.9165	580.194	3.17515	0.487793	4.63823	0.238378	34.4097	79.9902	5.96348	10.273	929.118	45.1443	9.90676	91.1985	2.43446	2.5908	8.28892	1.1439	6.23193	33.4135	1.17821	3.23945	0.467229	2.99215	0.389745	27.8067	11.5	8.24893	1.39397	0.874062
T774	94.5	29.5	gneissic granite	50.4	75.86	0.21	12.93	1.46	0.02	0.41	2.08	2.96	3.29	0.05	0.24	99.51	39.5631	6.25	1.05739	56.8811	1347.82	21.2096	0.724398	2.63357	0.337411	82.352	150.648	17.0195	17.1976	544.775	62.3412	9.6818	74.8969	2.41209	1.66988	6.07945	0.611272	2.69374	11.1302	0.444867	1.01977	0.128341	0.739612	0.106834	48.9455	111.345	79.8676	2.43763	0.665423
T775-1	94.5	29.5	gneissic granite		70.74	0.48	14.79	2.91	0.04	0.88	3.48	3.52	2.1	0.12	0.49	99.55	41.3466	5.62	1.02649	61.4518	496	18.3309	0.688354	6.48713	0.487676	75.3319	139.362	14.0788	15.2784	591.919	54.0351	8.84698	84.175	2.18276	1.50983	5.56731	0.626913	2.7882	12.464	0.464411	1.08861	0.125642	0.699747	0.101578	47.4901	107.656	77.2215	2.66684	0.657704
T775-2	94.5	29.5	gneissic granite		72.98	0.4	14.49	2.36	0.03	0.72	3.74	3.64	1.17	0.08	0.47	100.08	41.5607	4.81	1.02984	44.098	183.718	7.65568	0.463265	5.06427	0.421578	32.1255	59.628	11.1621	7.0583	566.871	25.6616	4.22283	79.2486	2.12352	1.10833	2.85227	0.322192	1.53913	7.28072	0.263311	0.635367	0.0732829	0.437942	0.0578129	77.8593	73.3557	52.618	2.35219	0.976326
T777	94.5	29.5	gneissic granite		74.54	0.38	13.45	2.52	0.02	0.81	3.71	3.06	1.15	0.09	0.56	100.29	42.8335	4.21	1.03148	33.4203	598.909	18.6345	0.49839	4.598	0.365035	73.3009	143.97	8.42251	15.4107	578.065	56.1531	8.84942	80.8425	2.17328	1.70456	5.37412	0.556873	2.23293	8.46557	0.362676	0.738019	0.0857363	0.460579	0.061256	68.2843	159.15	114.158	3.2448	0.755659
T967	94.5	29.5	gneissic granite		73.55	0.39	14.73	2.33	0.03	0.6	3.6	3.77	1.06	0.07	0.34	100.47	37.5108	4.83	1.05898	32.4051	292.482	4.09629	0.351746	4.61967	0.333823	18.7364	36.1614	11.18	4.07649	637.927	15.6274	2.61771	63.9975	1.69271	1.2204	1.9904	0.226595	1.0539	5.25391	0.18532	0.498235	0.071658	0.338146	0.0543994	121.42	55.4094	39.7451	2.08598	1.63454
T968	94.5	29.5	gneissic granite		74.43	0.33	14.44	2.02	0.03	0.54	3.24	4.11	1.08	0.06	0.29	100.57	38.3918	5.19	1.04373	33.9483	209.767	9.24953	0.790273	5.0326	0.399076	37.7892	74.3362	11.3886	8.42605	589.702	31.0759	4.75783	92.2239	2.52567	1.09882	3.10861	0.377379	1.80045	8.75845	0.278591	0.792597	0.0977487	0.598685	0.0912171	67.3295	63.1204	45.2762	2.01279	0.873495
LS2	89.8	29.6	Granite	51.1	69.59	0.47	14.46	3.28	0.05	0.91	2.29	3.82	4.05	0.13	0.75	99.8	35.5144	7.87	0.97372	147	746	13.3	2.99	10.3	1.08	32.5	64	33	7.1	278	28	5.5	195	5.5	1.28	5.6	0.82	4.7	29.7	0.95	2.63	0.42	2.86	0.46	9.36027	11.3636	8.15113	1.09988	0.705112
LS4	91.15	29.65	Diorite		54.15	0.82	18.42	8.04	0.14	3.65	8.02	3.25	1.28	0.22	1.55	99.54	47.401	4.53	0.863023	35	296	2.5	0.67	4.3	0.38	13.3	29	6	3.5	478	16	3.8	74	2.3	1.15	4	0.62	3.8	23.2	0.79	2.09	0.34	2.29	0.36	20.6034	5.80786	4.16598	1.11061	0.901778
LS5	91.15	29.65	Diorite	61	56.09	0.77	17.46	8.35	0.14	4.01	7.53	3.07	1.43	0.19	0.78	99.82	48.8047	4.5	0.859349	37	322	2.3	0.59	3.9	0.33	13	28	9	3.4	437	16	3.6	67	2	1.11	3.8	0.59	3.5	22.2	0.75	2.04	0.32	2.16	0.36	19.6847	6.01852	4.31708	1.0845	0.917495
LS7	91.15	29.65	Granite		71.27	0.29	14.73	2.39	0.06	0.82	2.41	3.71	3.62	0.11	0.38	99.79	40.514	7.33	1.02141	107	615	9.2	1.96	7.5	0.83	19.9	39	13	4.2	260	16	3.1	126	3.6	0.83	3.2	0.47	2.7	18.5	0.57	1.64	0.28	2.08	0.35	14.0541	9.56731	6.86263	0.868792	0.805649
13SS-01	86.28	29.63	Granodiorite	52.71	66.59	0.51	15.32	5.16	0.16	1.42	3.42	3.26	3.64	0.12	0.24	99.84	6.9	35.29	0.985697	185.4	497	38.81	5.07	11.09	1.4	36.26	70.17	16.53	7.79	300	27.57	4.97	143.4	4.54	0.95	4.51	0.68	4	22.44	0.81	2.41	0.36	2.46	0.4	13.369	14.7398	10.5729	1.08828	0.613452
13SS-02	86.28	29.63	Granite	53.75	72.12	0.26	14.33	2.79	0.12	0.41	1.5	3.9	4.06	0.07	0.4	99.95	7.96	22.5	1.05727	164.9	493	21.25	3.6	9.33	1.34	31.41	58.74	14.06	6.06	202	20.17	3.33	110.9	3.79	0.59	3.01	0.45	2.68	15.24	0.55	1.71	0.28	2.02	0.33	13.2546	15.5495	11.1537	0.887971	0.569732
13SS-03	86.28	29.63	Granodiorite	53.95	65.37	0.57	15.26	5.34	0.18	1.67	3.9	3.07	3.69	0.15	0.3	99.51	6.76	38.24	0.944409	138.6	532	23.36	3.96	8.69	0.89	37.53	72.5	19.7	7.96	352	28.41	5.01	112.9	3.45	1.03	4.45	0.64	3.72	20.07	0.75	2.09	0.31	2.08	0.32	17.5386	18.0433	12.9424	1.197	0.666902
13SS-04	86.28	29.63	Granodiorite	53.26	63.32	0.74	15.34	6.26	0.17	2.2	4.48	3.24	3.17	0.18	0.39	99.48	6.41	41.05	0.906078	147.8	529	19.47	4.18	10.05	1.12	58.19	107.7	19.41	10.83	370	36.74	6.06	77.9	2.84	1.17	5.25	0.77	4.28	23.72	0.86	2.39	0.35	2.32	0.36	15.5987	25.0819	17.9912	1.23473	0.634152
13SS-09	86.28	29.63	Granite		72.47	0.24	14.43	2.71	0.11	0.51	1.47	3.83	3.84	0.06	0.4	100.08	7.67	27.3	1.09773	138.97	504.8	18.74	2.556	8.447	0.821	29.77	55.68	13.84	5.871	257	18.59	3.452	107.3	3.164	0.615	3.129	0.397	2.75	14.98	0.539	1.83	0.274	2.106	0.35	17.1562	14.1358	10.1396	0.873956	0.572085
13SS-10	86.28	29.63	Granodiorite		64.43	0.66	15.28	5.93	0.17	1.98	4.24	3.16	3.48	0.16	0.35	99.84	6.64	39.8	0.915094	140.9	551.9	20.31	4.116	9.986	1.107	64.61	115.7	20.49	11.93	371.5	39.2	6.139	35.91	3.39	1.184	5.349	0.738	4.321	22.93	0.806	2.336	0.359	2.362	0.37	16.2015	27.3539	19.621	1.22439	0.63167
13SS-11	86.2	29.63	Monzonite		66.89	0.39	16.11	3.15	0.16	0.73	1.87	4.05	5.39	0.14	0.46	99.34	9.44	27.2	1.01208	139.1	933.6	13.96	2.455	6.686	0.568	32.67	65.53	19.69	7.737	381.4	28.7	5.075	30	3.488	1.282	4.152	0.595	3.419	17.1	0.66	1.77	0.264	1.702	0.258	22.3041	19.1951	13.7686	1.34448	0.853817
06FW101	91.112	29.687	Monzogranite	64.7	72.29	0.27	14.28	1.99	0.05	0.57	2.24	4.13	3.62	0.07	0.33		7.75	36	0.964695	100	415	15.7	4.03	9.11	0.87	29.7	58.95	13.82	6.9	197	25.45	4.86	108	3.37	0.78	4.26	0.69	4.46	27.16	0.92	2.7	0.44	3.19	0.46	7.25331	9.31034	6.67831	0.935749	0.524077
06FW104	91.076	29.675	Monzogranite	64.4	71.71	0.37	14.26	2.52	0.08	0.83	2.32	4	3.28	0.1	0.45		7.28	39	0.992655	93	523	12.33	2.63	9.08	0.77	28.8	52.66	10.91	6.54	201	24.04	4.48	171	4.66	0.78	3.96	0.61	4.04	23.78	0.81	2.39	0.38	2.76	0.42	8.45248	10.4348	7.48487	0.979687	0.56615
06FW105	90.932	29.682	Monzogranite	55.2	67.62	0.56	14.99	3.5	0.06	1.27	3.14	3.48	4.25	0.16	0.37		7.73	42	0.933599	154	661	36.36	7.82	10.33	0.92	40.23	74.76	25.9	8.17	315	29.49	5	171	4.54	1.09	4.21	0.61	3.84	21.38	0.74	2.13	0.33	2.44	0.36	14.7334	16.4877	11.8266	1.05331	0.726313
06FW108	90.776	29.759	Granodiorite	56.8	62.25	0.75	15.62	6.23	0.1	2.71	5.17	3.21	2.9	0.16	0.37		6.11	46	0.875337	91	497	13.36	3.03	6.82	0.54	23.91	48.46	21.04	5.7	332	21.63	4.31	164	4.24	1.01	3.95	0.59	3.65	20.03	0.71	1.97	0.29	1.96	0.29	16.5751	12.199	8.75032	1.24638	0.748355
06FW110	90.833	29.738	Monzogranite	54.3	73.45	0.22	13.54	1.74	0.04	0.42	1.78	3.18	4.81	0.05	0.55		7.99	32	0.988818	202	380	34.4	7.97	9.18	1.21	24.8	50.82	15.51	5.9	143	22.9	4.63	132	4.69	0.61	4.23	0.7	4.87	29.89	0.98	2.94	0.48	3.64	0.52	4.78421	6.81319	4.8871	0.895453	0.421398
06FW111	90.956	29.443	Monzogranite	50.6	66.49	0.5	15.1	4.32	0.08	1.69	3.71	3.84	3.3	0.16	0.68		7.14	44	0.906593	66	454	18.11	4	5.81	0.51	20.8	37.5	11.52	4.08	324	13.96	2.41	187	4.73	0.71	2.06	0.3	1.9	11.32	0.39	1.15	0.19	1.45	0.23	28.6219	14.3448	10.2895	0.877002	0.974181
06FW112	90.961	29.491	Granodiorite	53.4	60.23	0.66	17.15	6.65	0.12	2.91	6.39	3.9	1.85	0.19	0.43		5.75	46	0.854828	20	370	4.98	1.45	7.08	0.49	15.45	31.82	13.27	4.69	386	19.25	4.24	98	2.43	1.02	3.97	0.63	4.16	24.55	0.87	2.49	0.38	2.66	0.38	15.723	5.80827	4.16627	1.04671	0.760056
06FW118	90.939	29.499	Monzogranite	51	73.27	0.24	13.53	1.75	0.03	0.54	1.76	2.9	5.22	0.05	0.35		8.12	38	0.991867	131	555	29.49	5.41	2.75	0.16	13.63	25.88	14.75	2.79	229	10.16	1.79	115	3.42	0.61	1.41	0.21	1.2	6.7	0.23	0.61	0.1	0.68	0.11	34.1791	20.0441	14.3776	1.1811	1.17386
06FW119	90.939	29.499	Granodiorite	51.2	63.91	0.67	15.92	5.51	0.09	2.32	4.65	3.64	3.21	0.19	0.48		6.85	46	0.887342	119	690	11.35	2.74	5.19	0.4	17.44	33.38	13.7	3.8	476	13.98	2.93	179	4.68	0.83	2.41	0.37	2.13	13.1	0.45	1.21	0.19	1.26	0.21	36.3359	13.8413	9.92834	1.13142	0.954903
06FW121	90.939	29.499	Granite	51.1	75.29	0.13	12.73	1.16	0.01	0.29	1.43	2.6	5.26	0.03	0.4		7.86	33	1.01114	120	1438	10.75	2.4	0.68	0.06	4.42	5.51	14.17	0.48	371	1.48	0.22	98	3.01	0.3	0.21	0.03	0.18	1.54	0.04	0.16	0.03	0.28	0.06	240.909	15.7857	11.3231	0.430259	4.26701
06FW126	90.874	29.482	Granodiorite	55.3	56.62	1.15	18.46	6.91	0.12	2.65	5.67	4.71	2.36	0.42	0.6		7.07	43	0.894507	78	850	10.16	2.69	15.7	1.11	45.68	97.73	10.04	12.27	919	46.95	8.95	378	8.82	2.08	6.7	0.96	5.34	31.13	1.07	2.87	0.45	3.1	0.48	29.5214	14.7355	10.5698	1.15291	0.821179
06FW129	90.897	29.464	Granodiorite	52.9	57.43	1.05	18.67	6.24	0.11	2.32	5.27	4.73	2.71	0.37	0.6		7.44	42	0.918746	65	1273	6.82	1.97	13.52	0.88	42.5	90.86	10.12	11.7	942	44.89	8.53	339	8.02	2.08	6.19	0.88	4.69	25.33	0.93	2.44	0.37	2.25	0.34	37.1891	18.8889	13.549	1.3951	0.875119
06FW146	90.718	29.403	Monzodiorite	56.9	52.88	0.77	19.06	9.41	0.16	4.35	8.37	3.88	0.55	0.34	-0.05		4.43	48	0.857578	4	200	0.42	0.16	1.39	0.08	9.61	22.75	4.84	3.17	865	13.42	3.37	30	0.88	1.29	2.85	0.43	2.35	13.54	0.51	1.3	0.19	1.2	0.19	63.8848	8.00833	5.74437	1.3107	1.27255
06FW147	90.724	29.368	Granodiorite	51.5	61.42	0.71	16.83	6.18	0.11	2.66	5.34	4.18	2.46	0.22	0.45		6.64	46	0.873262	58	452	4.71	1.63	5.22	0.37	17.44	36.84	17.61	4.75	559	17.98	4.13	173	4.79	1.01	3.4	0.54	2.95	18.78	0.66	1.81	0.28	1.79	0.29	29.7657	9.74302	6.98866	1.10302	0.824006
06FW148	90.724	29.368	Syenogranite	51.3	71.69	0.26	14.23	2.17	0.06	0.71	2.33	4.05	3.66	0.1	0.45		7.71	39	0.956425	81	681	12.61	2.11	4.95	0.41	27.3	47.17	26.21	4.79	456	15.32	2.5	96	2.72	0.62	1.75	0.22	1.14	7.01	0.22	0.6	0.09	0.64	0.1	65.0499	42.6562	30.5973	1.19218	0.906205
06FW151	90.717	29.358	Diorite	55.5	56.09	1.08	17.43	8.4	0.14	3.48	7.22	3.79	1.94	0.51	0.42		5.73	45	0.811038	56	503	4.19	1.3	5.33	0.39	17.74	40.89	13.33	5.26	580	20.16	4.72	121	3.45	1.22	3.9	0.6	3.35	20.82	0.75	2	0.32	1.99	0.33	27.8578	8.91457	6.39442	1.1267	0.869321
06FW152-2	90.179	29.401	Diorite	57.3	53.49	1.32	17.36	9.18	0.15	4.08	7.66	3.49	1.45	0.45	0.73		4.94	47	0.816282	43	501	6.17	1.67	8.33	0.56	17.62	40.56	16.44	5.35	690	21.83	5.25	150	4.37	1.46	4.51	0.72	4.02	24.34	0.89	2.38	0.36	2.23	0.37	28.3484	7.90135	5.66763	1.20653	0.917294
06FW154	90.274	29.578	Syenogranite	51.3	75.43	0.23	12.37	1.71	0.05	0.32	1.17	3.28	4.52	0.05	0.23		7.8	27	0.995022	206	189	18.03	5.09	16.6	2.02	20.76	48.9	12.15	6.43	122	23.85	5.58	119	3.86	0.49	4.36	0.76	4.47	32.5	1.01	2.97	0.53	3.75	0.61	3.75385	5.536	3.97097	0.797795	0.30371
06FW155	90.273	29.543	Monzodiorite	61.1	70.33	0.41	14.28	2.02	0.05	0.89	2.52	3.4	5.06	0.13	0.58		8.46	47	0.911052	168	563	25.38	5.63	11.3	1.07	32.71	61.54	12.5	6.46	306	20.83	3.66	127	3.61	0.8	2.87	0.43	2.52	17.16	0.54	1.57	0.27	1.88	0.32	17.8322	17.3989	12.4802	0.897135	0.754627
06FW156	90.271	29.499	Monzodiorite	55.4	67.99	0.46	15.4	3.28	0.06	1.11	2.79	3.69	4.78	0.14	0.55		8.47	40	0.942516	173	665	18.64	5.07	10.61	0.99	33.81	60.68	11.71	6.41	366	20.82	3.9	150	4.22	0.86	3.04	0.46	2.64	17.69	0.58	1.63	0.28	1.87	0.32	20.6897	18.0802	12.9689	0.944882	0.763577
06FW163	89.623	29.539	Monzogranite	50.9	71.58	0.48	14.33	2.88	0.04	0.8	1.73	3.02	4.79	0.1	0.18		7.81	35	1.07606	146	937	3.63	1.21	9.2	0.5	17.48	35.97	16.29	4.31	245	17.65	3.42	345	8.88	0.88	3	0.44	2.86	15.12	0.55	1.56	0.23	1.66	0.25	16.2037	10.5301	7.55325	1.15312	0.83991
06FW174	90.097	29.351	Granodiorite	50.2	56.45	0.79	17.45	7.84	0.15	3.06	6.93	4.02	2.14	0.25	0.3		6.16	44	0.809438	42	370	9.77	2.18	7.87	0.43	24.73	63.59	11.3	8.69	677	37.2	8.04	160	4.44	1.66	6.86	1.01	6.34	34.08	1.25	3.46	0.51	3.36	0.47	19.865	7.36012	5.27941	1.26289	0.683348
06FW175	90.067	29.349	Monzogranite	52.6	57.57	0.78	17.59	7.24	0.14	3.06	6.56	3.9	2.07	0.3	0.2		5.97	46	0.853433	14	264	2.65	0.69	5.1	0.28	14.18	31.12	10.74	4.59	542	19.6	4.29	82	2.12	1.17	3.73	0.57	3.57	18.02	0.72	2	0.31	2.04	0.3	30.0777	6.95098	4.98594	1.17126	0.894183
06FW176	90.2	29.3347	Diorite	53.6	54.48	1.03	17.99	8.47	0.15	3.09	6.97	4.34	2.06	0.39	0.38		6.4	42	0.815109	10	230	3.23	1.09	7.34	0.29	21.28	49.25	7.57	7.92	515	34.77	7.53	205	4.79	1.67	6.27	0.93	5.75	29.67	1.15	3.17	0.46	3.04	0.44	17.3576	7	5.0211	1.26593	0.743034
08FW51	91.164	29.637	Granodiorite	64.5	66.35	0.56	15.31	4.69	0.06	1.97	4.38	3.12	2.8	0.13	0.82		5.92	45	0.948043	89.9	617	9.47	1.21	5.8	0.5	19.1	39.7	15.6	4.76	338	18.9	4.17	129	3.98	0.95	4.05	0.67	3.93	23.1	0.78	2.3	0.35	2.31	0.37	14.632	8.2684	5.93092	1.13866	0.706727
09FW41	92.738	29.419	Monzogranite	56.1	70.44	0.4	14.91	2.91	0.06	0.84	2.2	3.95	4.08	0.12	0.22		8.03	36	0.998476	159	530	26.2	4.61	12.7	1.38	36.1	71.5	12.8	8.2	251	29.9	5.84	123	3.78	0.99	4.71	0.75	4.42	27.13	0.89	2.65	0.39	2.77	0.4	9.25175	13.0325	9.3482	1.06797	0.577088
09FW42	92.745	29.407	Monzogranite	50.7	69.74	0.31	14.99	2.93	0.05	0.99	2.35	3.51	4.69	0.11	0.36		8.2	40	0.98983	178	839	27.2	5.84	10.4	0.94	42.3	76.7	18.7	8	378	27.1	4.6	106	3.06	0.92	3.36	0.5	2.75	16.39	0.54	1.52	0.24	1.72	0.26	23.0628	24.593	17.6406	1.07009	0.715423
09FW50	92.697	29.239	Granodiorite	50.2	67.85	0.4	15.31	3.93	0.07	1.63	3.49	3.62	3.44	0.12	0.36		7.06	45	0.954189	100	631	13.1	2.01	5.04	0.43	37.4	66.9	25.7	6.82	486	23	3.5	65	1.94	0.73	2.82	0.39	2.18	12.9	0.44	1.2	0.17	1.23	0.19	37.6744	30.4065	21.8106	1.18622	0.710375
SR03-1	92.217	29.267	Granodiorite	59.8	71.48	0.24	14.79	2.71	0.08	0.74	2.92	4.03	2.55	0.1	0.36		6.58	35	1.00506	70.3	311	4.45	1.52	6.88	0.89	13.6	27.2	20.9	3.23	357	12.4	2.68	82	2.72	0.62	2.51	0.39	2.46	15.81	0.49	1.53	0.24	1.81	0.3	22.5806	7.51381	5.38965	0.909645	0.730821
07TB22a	91.8214	29.2658	Granodiorite		66.39	0.4	15.66	4.29	0.08	1.61	3.89	3.27	3.26	0.09	0.36	99.31	42.6926	6.53	0.978598	75	472	8.27	1.82	4.44	0.428	16.6	32.3	12.6	3.94	383	14.6	2.67	92.2	3.05	0.716	2.35	0.395	2.39	12.9	0.489	1.45	0.234	1.54	0.253	29.6899	10.7792	7.73193	1.03871	0.873871
07TB22b	91.8214	29.2658	Granodiorite		66.37	0.41	15.47	4.48	0.08	1.68	3.68	3.19	3.73	0.09	0.46	99.64	42.6736	6.92	0.966974	80.3	495	7.02	1.84	3.86	0.387	10.7	22.6	12.9	3.03	382	12.4	2.49	77.9	2.54	0.692	2.2	0.379	2.32	13	0.48	1.39	0.225	1.5	0.242	29.3846	7.13333	5.11674	1.03517	0.903897
07TB23	91.8197	29.265	Granodiorite		67.39	0.4	14.8	4.88	0.08	1.53	3.17	3.06	4.02	0.08	0.63	100.02	38.3616	7.08	0.975594	84.6	438	11.2	2.56	4.13	0.522	19.1	35.3	19.2	3.97	315	14.3	2.46	83.4	2.95	0.633	2.12	0.344	2.03	11.5	0.424	1.25	0.199	1.38	0.233	27.3913	13.8406	9.92784	0.984537	0.847407
07TB24a	91.8181	29.2642	Granite		70.78	0.27	15.15	2.65	0.03	0.75	2.23	3.46	3.63	0.05	0.97	99.96	35.9717	7.09	1.10641	63	361	10.2	3.03	3.9	0.643	14.1	24.4	16.1	2.53	331	8.29	1.27	66.9	2.3	0.423	1.09	0.185	1.12	7.01	0.24	0.768	0.132	0.972	0.172	47.2183	14.5062	10.4053	0.7712	1.09913
07TB24c	91.8167	29.265	Granodiorite		65.85	0.45	16.17	4.97	0.08	1.86	4.02	3.14	2.94	0.09	0.85	100.43	42.6244	6.08	1.03137	65	403	9.2	1.58	3.79	0.369	24.9	42.6	11.3	4.52	377	15.1	2.4	74	2.29	0.67	2.14	0.332	1.89	11	0.387	1.16	0.17	1.19	0.203	34.2727	20.9244	15.009	1.06299	0.903828
07TB24d	91.8167	29.265	Granodiorite		67.18	0.42	15.03	4.46	0.08	1.73	3.44	3.02	3.68	0.08	0.85	99.98	43.5025	6.7	0.987043	78.5	467	9.73	2.44	4.17	0.508	16.3	30.1	17.9	3.49	333	12.6	2.24	84.5	2.76	0.627	1.95	0.325	1.99	11.1	0.411	1.2	0.193	1.31	0.226	30	12.4427	8.92518	1.01671	0.91717
07TB25a	91.8086	29.2622	Granodiorite	62	64.67	0.48	16.16	4.85	0.08	2.06	4.17	3.22	3.24	0.09	0.74	99.76	45.7447	6.46	0.984854	71.2	458	9.72	1.73	4.22	0.459	15.4	29.8	12.5	3.56	394	13.8	2.61	68.9	2.33	0.737	2.3	0.388	2.33	12.6	0.485	1.42	0.223	1.51	0.242	31.2698	10.1987	7.31551	1.03275	0.919617
07TB26a	91.8106	29.2647	Granodiorite		64.14	0.49	15.79	5.31	0.09	2.12	4.14	3.12	3.25	0.1	0.73	99.27	44.2129	6.37	0.974679	79.3	471	7.82	2.44	4.67	0.492	17.4	33.3	11.9	3.91	392	14.5	2.61	81.9	2.67	0.721	2.34	0.396	2.38	13.5	0.491	1.43	0.226	1.55	0.258	29.037	11.2258	8.05227	1.02769	0.89193
07TB27	91.8133	29.2661	Granodiorite		63.9	0.5	16.02	5.06	0.08	2.1	4.31	3.27	2.84	0.11	1.59	99.77	45.1706	6.11	0.982115	59.3	411	9.06	1.33	4.21	0.448	23	41.8	12.4	4.54	394	16.3	2.74	67.8	2.22	0.722	2.38	0.38	2.24	12.2	0.453	1.34	0.211	1.39	0.226	32.2951	16.5468	11.869	1.07857	0.864365
07TB28a	91.4153	29.3553	Diorite	61.5	59.79	0.49	17.51	6.75	0.1	2.57	6.07	3.6	1.64	0.18	0.87	99.58	43.0457	5.24	0.933457	26	301	2.96	0.9	3.01	0.241	13.8	27.1	9.3	3.39	511	13.7	2.68	60	1.72	0.846	2.51	0.401	2.44	14.8	0.491	1.44	0.21	1.52	0.236	34.527	9.07895	6.51233	1.07439	0.997217
07TB29a	91.4133	29.3547	Diorite		59.12	0.6	16.62	6.75	0.11	2.67	5.95	3.22	1.68	0.16	2.68	99.58	43.9839	4.9	0.925498	32.1	310	2.99	0.69	2.95	0.225	14.2	27.3	8.1	3.31	514	13.2	2.55	50.4	1.47	0.802	2.49	0.414	2.46	15.3	0.503	1.46	0.224	1.46	0.232	33.5948	9.72603	6.97648	1.12771	0.973035
07TB30b	91.4183	29.3544	Diorite		59.44	0.64	17.21	7.32	0.12	2.79	6.26	3.41	1.59	0.2	0.58	99.55	43.0719	5	0.918481	27.7	284	2.74	0.75	2.78	0.249	14.1	28.2	10	3.46	521	13.8	2.65	27.9	1.05	0.867	2.52	0.412	2.36	14.4	0.502	1.45	0.223	1.49	0.242	36.1806	9.46309	6.78787	1.06009	1.0257
07TB31	91.4172	29.3519	Diorite		60.66	0.58	17.15	6.55	0.12	2.53	5.71	3.51	1.33	0.18	1.27	99.58	43.3988	4.84	0.973433	20.2	248	3.17	0.79	3.07	0.255	15.8	31.1	8.6	3.81	519	15.1	2.83	66.3	1.88	0.838	2.66	0.398	2.45	15.1	0.51	1.42	0.215	1.57	0.252	34.3709	10.0637	7.21868	1.04444	0.933756
07TB32	91.4169	29.3514	Diorite		60.59	0.58	17.1	6.57	0.11	2.55	5.6	3.92	1.9	0.18	0.48	99.58	43.5174	5.82	0.913914	32.5	312	3.88	0.88	3.01	0.245	15.5	29.9	9.7	3.6	486	14	2.56	36.7	1.21	0.799	2.47	0.405	2.29	14.1	0.484	1.39	0.211	1.44	0.232	34.4681	10.7639	7.72093	1.06436	0.971409
09TB119	91.4325	29.3539	Diorite		61.7	0.61	16.21	6.37	0.11	2.67	5.42	3.2	2.33	0.12	0.96	99.71	45.4161	5.53	0.917636	46.7	370	4.92	1.12	3.83	0.486	15.2	33.3	12.3	4.41	429	16.5	3.49	52	1.67	0.959	3.31	0.543	3.29	20.5	0.69	2.03	0.31	2.21	0.341	20.9268	6.87783	4.93346	0.996366	0.862612
09TB120	91.4339	29.3528	Diorite		61.52	0.67	16.5	6.44	0.1	2.7	5.42	3.28	2.27	0.14	0.69	99.72	45.4222	5.55	0.930549	52.2	357	4.54	1.02	4.05	0.501	15	32.8	11.5	4.37	447	16.3	3.37	51	1.6	0.913	3.15	0.534	3.05	19.4	0.668	1.89	0.286	1.98	0.317	23.0412	7.57576	5.43409	1.03098	0.856691
T102A	89.33	29.24	Linzizong volcanic	53	62.72	0.65	16.49	6.17	0.08	1.37	3.47	4.11	2.87	0.27	0.13	98.33	30.5925	6.98	1.01814	361	307	12.7	1.8	10	0.72	42.9	85.2	11.3	8.95	299	34.1	6.48	26.3	0.86	1.24	6.04	0.94	5.27	33.4	1.07	3.05	0.45	2.94	0.44	8.9521	14.5918	10.4667	1.19972	0.605954
T104	89.33	29.24	Linzizong volcanic	53	71.54	0.29	14.81	2.89	0.02	0.76	0.69	0.79	4.32	0.03	2.1	98.24	34.298	5.11	2.04442	306	333	19.8	2.9	11.1	0.97	42.8	84.6	5.5	8.5	40.8	31	5.98	105	3.8	0.98	5.56	0.89	5.05	32.3	1.04	2.98	0.46	2.96	0.45	1.26316	14.4595	10.3718	1.14187	0.519591
T105A	89.33	29.24	Linzizong volcanic	53	57.47	1.19	17.15	9.19	0.1	2.47	2.23	4.5	2.32	0.33	4.08	101.03	34.7908	6.82	1.22654	150	293	12.9	3.4	10.6	0.72	39.5	85.1	11.9	10.4	199	43	8.76	315	7.4	1.62	7.85	1.25	7.14	43.9	1.46	4.14	0.61	3.86	0.58	4.53303	10.2332	7.34024	1.23802	0.597244
T151	85.81	30.13	Linzizong volcanic	53.9	49.99	1.29	16.79	9.04	0.14	6.54	9.39	2.62	1.71	0.45	2.87	100.84	58.9507	4.33	0.721559	47.3	340	4.6	0.79	12.6	0.73	40.5	85	15.2	10	861	40.4	7.73	219	4.6	1.88	6.76	1.01	5.39	31.1	1.05	2.93	0.42	2.64	0.39	27.6849	15.3409	11.004	1.36647	0.795094
T152B	85.81	30.13	Linzizong volcanic	53.9	49.66	0.98	17.14	8.87	0.14	6.96	7.97	2.42	1.65	0.23	3.31	99.32	60.901	4.07	0.844813	64	304	2.6	0.48	5.4	0.38	18.3	41.1	7.2	4.89	743	20.8	4.49	99.1	2.6	1.28	4.24	0.67	3.72	20.7	0.75	2.09	0.3	1.89	0.28	35.8937	9.68254	6.94528	1.31734	0.896866
WR-12-30B	88.3197	29	Quartz monzonite	67.7	66.01	0.57	15.54	4.58	0.1	1.6	3.57	3.81	3.69	0.15	0.3	99.91	40.9497	7.5	0.9264	142	525	17.49	2.78	8.43	0.88	28.77	52.3	22.49	6.44	316	23.3	4.45	194	6.04	1.01	4.24	0.63	3.71	18.81	0.75	2.2	0.33	2.35	0.36	16.7996	12.2426	8.78158	1.05663	0.710857
WR-13-117	90.1325	29	Trachyandesite	53	62.37	0.75	14.86	5.56	0.1	1.73	3.25	3.71	3.35	0.22	4	99.89	38.1821	7.06	0.949018	99.6	818	19.82	4.22	7.64	0.81	34.67	67.08	5.53	8.46	156	32.5	6.38	269	7.78	1.37	6	0.87	5.41	26.94	1.09	3	0.46	3.01	0.48	5.79065	11.5183	8.26205	1.20295	0.676953
WR-13-118	90.1325	29	Dacite	53	64.12	0.79	15.06	6.04	0.08	1.73	2.19	4.39	2.63	0.22	3.13	100.38	36.2476	7.02	1.07074	79.5	514	19.29	4.19	7.7	0.79	38.99	65.23	5.71	8.92	127	34.57	6.71	266	7.45	1.47	6.48	0.95	5.54	28.77	1.1	3.14	0.48	3.12	0.47	4.41432	12.4968	8.96395	1.18842	0.681541
WR-12-33	86.3183	29.5547	Granodiorite	50.73	65.59	0.68	15.12	5.29	0.1	2.05	4.38	3.23	3.27	0.19	0.57	100.5	43.4791	6.5	0.897861	99	620	20.1	3.9	6.9	0.74	30.9	60.3	12	5.98	585	22	4.15	135	3.2	0.983	3.27	0.5	2.7	16	0.55	1.59	0.237	1.57	0.249	36.5625	19.6815	14.1176	1.15101	0.815792
WR-12-35	86.3183	29.5547	Monzodiorite	50.73	54.3	1.22	17.24	8.88	0.17	3.95	6.94	4.47	1.73	0.32	0.96	100.2	46.8931	6.2	0.788229	88	294	8.68	3.19	11.2	0.93	34.5	72.1	11	7.92	649	33.3	7.08	158	3.8	1.33	6.65	1.01	5.42	32	1.06	3.1	0.481	3.14	0.489	20.2812	10.9873	7.88116	1.15527	0.592581
74-329	90.75	29.37	Granodiorite		62.36	0.57	16.74	5.79	0.1	2.3	5.22	3.49	2.61	0.15		99.33	44.0884	6.1	0.925803	88.5	964	9.59	3.85	5.49	0.57	17.4	38	18.2	4.84	506	17.5	3.35	114	3.43	0.91	3.26	0.5	3.08	18	0.64	1.86	0.29	1.91	0.31	28.1111	9.10995	6.53456	1.07928	0.841848
ET021D	91.63	29.69	Monzogranite	64.6	71.62	0.27	14.38	1.66	0.01	0.73	2.12	2.52	4.5	0.05		97.85	46.6082	7.02	1.11557	116	503	19.4	3.8	6.21	0.98	17.2	30.5	11	3	232	10.6	1.81	140	4.21	0.53	1.59	0.25	1.42	10.7	0.3	0.94	0.15	1.07	0.18	21.6822	16.0748	11.5304	0.888218	0.955128
ET021E	91.63	29.69	Gabbro	64	55.05	0.76	18.19	6.87	0.11	3.59	7.13	3.14	1.45	0.15		96.43	50.9158	4.59	0.922133	42.1	315	3.05	0.67	4.36	0.32	15.9	32.6	6.86	3.82	417	16.1	3.68	133	3.24	0.98	3.75	0.62	3.75	23.8	0.79	2.23	0.34	2.2	0.35	17.521	7.22727	5.18412	1.14084	0.806511
ST042B	88.23	29.45	Granodiorite	50.7	63.91	0.65	15.77	5.09	0.08	1.96	3.93	3.11	3.71	0.14		98.35	43.323	6.82	0.96746	151	537	19.1	2.99	10.1	0.85	30.6	61.5	24.9	6.7	365	25.2	4.78	216	5.59	0.96	4.25	0.68	3.94	24.7	0.79	2.29	0.36	2.33	0.36	14.7773	13.133	9.42033	1.13176	0.651158
ST042C	88.23	29.45	Monzonite	50.7	63.03	0.67	16.38	4.02	0.07	1.26	2.85	4.54	3.39	0.25		96.46	38.3547	7.93	1.00253	78.8	577	10.2	3.07	20.6	1.52	32.7	64.6	11.5	7.03	384	26.8	5.09	334	7.38	1.36	4.63	0.74	4.3	28.5	0.9	2.67	0.44	2.97	0.49	13.4737	11.0101	7.89754	0.969008	0.856472
ST043B	88.23	29.45	Granodiorite	50.4	63.57	0.61	15.92	4.95	0.09	1.97	3.99	3.2	3.74	0.15		98.18	44.1345	6.94	0.959596	150	566	24.3	5.66	9.08	0.79	28.8	56.3	21.2	6.11	366	23	4.48	220	5.72	0.95	4.03	0.65	3.71	23.8	0.75	2.19	0.33	2.21	0.35	15.3782	13.0317	9.34761	1.12356	0.683527
ST102A	91.84	29.48	Gabbro		70.24	0.21	15.56	1.67	0.09	0.43	1.79	3.86	3.72	0.05		97.61	33.8241	7.58	1.14015	127	507	11.4	2.77	10.6	1.15	20.5	32.4	22.6	3.8	246	13.3	2.94	83	2.71	0.61	2.75	0.54	3.54	24.2	0.76	2.33	0.4	2.72	0.42	10.1653	7.53676	5.40612	0.871063	0.655863
ST103A	91.88	29.44	Diorite		55.51	0.8	18.99	7.64	0.12	2.69	6.97	3.22	1.81	0.27		98.01	41.1394	5.03	0.951554	56.8	482	10.1	2.71	6.84	0.54	40.1	65	8.03	8.23	659	32.6	7.04	130	3.58	1.6	6.05	0.96	5.42	29.5	1.03	2.79	0.41	2.55	0.38	22.339	15.7255	11.2799	1.42257	0.749514
ST104A	91.81	29.27	Granodiorite	60.1	65.58	0.43	16.57	3.99	0.07	1.71	4.25	3.21	2.7	0.1		98.6	45.9676	5.91	1.03875	69.2	446	8.52	1.51	3.88	0.38	13.5	26.5	12.7	2.96	336	11.7	2.3	107	3.09	0.75	2.1	0.34	2.01	12.3	0.41	1.22	0.2	1.31	0.21	27.3171	10.3053	7.39202	1.02693	1.04331
ST104B	91.81	29.27	Monzogranite	60.1	64.58	0.49	16.24	4.66	0.09	1.97	4.29	3.2	2.98	0.11		98.6	45.6279	6.18	0.995582	79.2	425	9.15	1.88	4.55	0.47	15.5	30.4	12.2	3.36	648	13	2.57	122	3.39	0.72	2.31	0.37	2.24	14.6	0.46	1.36	0.22	1.51	0.24	44.3836	10.2649	7.36301	0.992856	0.903407
ST105A	91.85	29.26	Granodiorite		59.66	0.7	17.58	6.53	0.1	3.04	5.22	3.44	2.29	0.17		98.71	48.0285	5.73	0.995915	81.9	400	6.51	1.33	4.99	0.38	23.9	48.6	8.67	5.46	425	21.7	4.31	208	5.36	0.98	3.86	0.62	3.63	22	0.74	2.17	0.33	2.17	0.35	19.3182	11.0138	7.90021	1.1196	0.734543
ST110A	92.01	29.24	Granodiorite		64.18	0.56	15.86	4.09	0.04	1.77	3.51	3.66	3.6	0.1		97.38	46.2094	7.26	0.971761	134	333	21.3	4.98	8.07	0.91	28.8	51.1	29.2	6.3	302	23.1	4.63	192	5.59	0.88	3.98	0.66	3.97	24.1	0.78	2.33	0.37	2.42	0.38	12.5311	11.9008	8.53646	1.09797	0.626721
ST111A	92.09	29.29	Gabbro		51.94	0.82	18.63	9.11	0.17	3.59	7.57	3.39	1.44	0.2		96.86	43.8914	4.83	0.890201	42.2	221	3.87	1.05	5.1	0.36	19.3	41.6	16.5	5.54	680	22.4	4.81	89.2	2.49	1.25	4.27	0.71	4.27	25.1	0.86	2.43	0.37	2.35	0.35	27.0916	8.21277	5.89101	1.21612	0.843232
ST113A	92.12	29.29	Monzogranite		71.04	0.26	15.24	1.79	0.04	0.55	1.79	3.34	4.4	0.08		98.53	37.8857	7.74	1.12641	221	523	29.6	5.81	8.08	1.03	39.2	58.5	45	6.16	429	19.7	3.04	136	3.96	0.66	2.29	0.28	1.46	8.73	0.27	0.78	0.12	0.83	0.14	49.1409	47.2289	33.8773	1.17731	0.764739
ST114	92.14	29.29	Monzogranite		71.76	0.19	15.18	1.34	0.03	0.36	1.79	3.38	4.35	0.05		98.43	34.7812	7.73	1.12102	199	417	18.7	2.22	6.24	0.98	25	39	51.5	4.38	370	14.5	2.37	98	3.1	0.51	1.77	0.24	1.28	7.77	0.24	0.68	0.11	0.75	0.11	47.619	33.3333	23.91	1.14226	0.76126
ST117A	92.19	29.25	Granodiorite	60.5	69.25	0.23	15.58	2.33	0.09	0.59	2.48	3.45	3.65	0.07		97.71	33.4511	7.1	1.10078	90.1	543	6.53	2.47	7.03	0.82	19.4	37.6	24.4	4.34	325	16.6	3.23	92.4	2.82	0.67	2.79	0.46	2.58	18.1	0.55	1.64	0.29	1.97	0.34	17.9558	9.84772	7.06376	0.876534	0.682331
ST147A	90.18	29.4	Diorite	50.6	53.87	0.9	18.73	8.19	0.15	3.88	7.71	3.61	1.56	0.26		98.84	48.4647	5.17	0.864129	46.5	603	3.16	1.17	5.07	0.31	17.7	38.6	20.4	4.79	608	20.8	4.47	107	2.84	1.26	4.15	0.66	3.83	23.3	0.78	2.23	0.34	2.15	0.34	26.0944	8.23256	5.90521	1.19227	0.894368
ST148	90.18	29.38	Tonalite		59.1	0.94	16.19	8.94	0.2	3.69	5.18	3.25	1.91	0.31		99.7	45.0349	5.16	0.960584	28.5	456	3.81	1.24	4.97	0.33	18.8	41.5	8.87	5.28	564	23.9	5.6	140	3.9	1.56	5.56	0.91	5.43	33.6	1.13	3.3	0.5	3.26	0.51	16.7857	5.76687	4.13657	1.1148	0.854706
ST152A	90.69	29.33	Gabbro	52.7	49.75	0.91	18.28	10.93	0.18	6.44	10.1	2.88	0.22	0.21		99.89	53.9087	3.1	0.782092	1.6	127	0.18	0.07	1.09	0.06	6.61	15.5	3.81	2.16	646	10.6	2.63	27.7	0.77	1	2.55	0.4	2.29	13.4	0.46	1.28	0.19	1.21	0.19	48.209	5.46281	3.91847	1.26668	1.18053
T032	91.78	29.27	Granodiorite		64.95	0.42	15.7	4.17	0.07	1.81	3.78	3.11	3.24	0.1		97.35	46.2834	6.35	1.01178	71.7	526	7.46	1.5	3.66	0.35	16.5	31.5	12.3	3.29	397	12.3	2.33	106	2.89	0.71	2.09	0.34	1.94	12.3	0.41	1.2	0.19	1.29	0.21	32.2764	12.7907	9.17476	1.00653	0.983628
T033	90.72	29.33	Diorite		57.01	0.63	16.44	7.06	0.13	4.22	6.52	3.38	1.87	0.19		97.45	54.2656	5.25	0.844571	42.4	378	3.56	0.88	4.21	0.3	17	37.2	14.7	4.64	561	19.9	4.23	154	3.89	1	3.88	0.59	3.46	21.7	0.72	2.08	0.31	2.08	0.32	25.8525	8.17308	5.86254	1.11334	0.754636
T041A	88.81	29.36	Tonalite		60.68	0.72	16.46	6.41	0.14	2.63	5.62	3.22	1.47	0.14		97.49	44.8873	4.69	0.960946	29	433	3.22	0.85	5.51	0.47	12.1	24.9	3.88	3	350	12.9	2.96	145	3.42	0.89	3.08	0.53	3.22	21.3	0.7	2.01	0.31	2.12	0.34	16.4319	5.70755	4.09402	1.01657	0.90114
T042B	88.65	29.36	Granodiorite		65.28	0.56	15.76	4.88	0.09	2.18	3.29	3.17	2.48	0.12		97.81	46.9993	5.65	1.13392	64.3	510	3.49	0.9	6.57	0.61	16.4	30.3	2.77	3.31	170	13.1	2.64	141	3.72	0.65	2.7	0.42	2.61	18.5	0.56	1.66	0.25	1.64	0.26	9.18919	10	7.173	1.06515	0.744309
T043A	88.55	29.45	Monzogranite		67.49	0.43	15.44	2.84	0.08	0.96	2.74	3.7	3.94	0.11		97.73	40.1558	7.64	1.00566	177	432	26.1	6.65	11.5	1.01	25.9	60.2	15.2	6.85	411	23.8	4.04	181	5.06	0.92	3.38	0.49	2.68	16.5	0.53	1.55	0.24	1.79	0.3	24.9091	14.4693	10.3788	1.00207	0.761136
T043B	88.55	29.45	Syenogranite		76.67	0.13	13.36	0.41	0.02	0.03	0.53	3.45	4.61	0.02		99.23	12.6827	8.06	1.14742	241	77.4	42.2	12.3	16.3	2.01	53.3	70.1	15.7	4.75	64.7	10.9	1.15	63.1	2.48	0.18	1.09	0.15	0.89	8.28	0.2	0.78	0.16	1.37	0.25	7.81401	38.9051	27.9066	0.434795	0.491512
T043C	88.55	29.45	Syenogranite		76.24	0.15	13.12	0.7	0.02	0.08	0.76	3.23	4.65	0.02		98.97	18.4914	7.88	1.11718	243	140	40.5	9.18	15.9	1.98	37.5	56.8	21.1	4.45	81.2	12.1	1.43	107	3.57	0.16	1.42	0.18	1.02	9.53	0.24	0.85	0.16	1.38	0.26	8.52046	27.1739	19.4918	0.494694	0.343267
T043E	88.55	29.45	Syenogranite		76.75	0.14	12.94	0.46	0.02		0.62	3.16	4.86	0.01		98.96		8.02	1.11536	273	8.18	55.2	17.5	19.2	3.17	42	74.6	16.7	6.62	33.3	19.6	3.23	115	4.93	0.23	2.79	0.45	2.82	20.6	0.6	1.95	0.35	2.56	0.41	1.6165	16.4062	11.7682	0.737266	0.234233
T043F	88.55	29.45	Granite		76.21	0.11	12.79	0.5	0.02		0.5	2.42	6.23	0.01		98.79		8.65	1.09765	239	86.7	50.7	22.4	26.6	2.86	31.9	53.9	21.8	4.46	74.2	12.1	1.64	126	5.56	0.13	1.61	0.25	1.6	16.4	0.39	1.49	0.29	2.26	0.4	4.52439	14.115	10.1247	0.473835	0.244586
T057A	90.72	29.36	Monzodiorite		57.82	0.76	17.24	7.22	0.13	2.97	5.96	3.46	2.55	0.19		98.3	44.9512	6.01	0.892571	73.7	539	5.97	2.1	5.28	0.39	19.2	41.3	13.1	5.17	530	20.8	4.56	105	3.14	1.14	4.23	0.66	3.81	22.7	0.75	2.1	0.31	2.08	0.32	23.348	9.23077	6.62123	1.22596	0.793553
T057B	90.72	29.36	Diorite		51.18	0.95	18.69	9.74	0.2	4.27	8.03	3.92	1.48	0.2		98.66	46.5311	5.4	0.824036	40.6	194	1.11	0.57	3.08	0.18	14.6	30.3	7.22	3.73	658	16.7	3.62	62.8	1.52	1.09	3.43	0.54	3.01	18.3	0.61	1.77	0.25	1.64	0.26	35.9563	8.90244	6.38572	1.22839	0.94569
T059A	90.07	29.51	Granodiorite		65.27	0.49	16.93	4.16	0.08	1.44	3.7	3.17	2.63	0.16		98.03	40.728	5.8	1.14328	86.3	520	6.77	1.49	6.81	0.59	15.6	32.7	12.1	4.1	483	16.7	3.73	135	3.7	1.04	3.57	0.58	3.36	19.5	0.65	1.88	0.28	2.02	0.31	24.7692	7.72277	5.53954	1.11328	0.871301
T059B	90.07	29.51	Diorite		54.47	0.95	18.55	8.28	0.2	3.32	6.49	3.4	2.12	0.3		98.08	44.3189	5.52	0.940906	90.2	321	3.7	1.24	9.55	0.56	26.7	60.2	8.46	7.39	482	28.8	5.71	104	2.84	1.25	5.06	0.8	4.53	25.8	0.89	2.48	0.38	2.53	0.4	18.6822	10.5534	7.56992	1.19838	0.710952
T076A	91.22	29.67	Granodiorite	59.3	69.89	0.31	16.2	2.29	0.06	0.7	2.91	3.62	2.83	0.1		98.91	37.764	6.45	1.13076	95	571	13.7	1.51	6.42	0.58	30.7	57.5	7.72	6.03	330	21.9	3.81	155	3.87	0.86	3.36	0.5	2.67	17.6	0.54	1.59	0.25	1.69	0.27	18.75	18.1657	13.0302	1.0574	0.734835
T077	91.27	29.68	Granodiorite		69.05	0.33	16.21	2.42	0.06	0.74	2.86	3.63	3.22	0.11		98.63	37.7723	6.85	1.10458	103	645	13.1	1.71	6.24	0.54	29.9	56.1	20.5	5.93	329	21.7	3.76	152	3.85	0.88	3.41	0.5	2.83	19.2	0.6	1.74	0.27	1.85	0.29	17.1354	16.1622	11.5931	1.02383	0.751338
T084A	90.79	29.75	Granodiorite	59.4	59.35	0.86	16.39	7.31	0.11	2.96	5.79	2.92	2.74	0.18		98.61	44.5615	5.66	0.894498	119	580	12.9	3.06	6.82	0.55	24.4	50.3	9.47	5.85	374	24.1	4.99	139	3.51	1.12	4.86	0.73	4.26	26.2	0.87	2.44	0.36	2.28	0.35	14.2748	10.7018	7.67636	1.25052	0.695302
T084B	90.79	29.75	Monzogranite	59.4	75.48	0.11	13.09	0.72	0.01	0.1	1.05	1.76	6.24	0.02		98.58	21.6118	8	1.13049	158	561	49.4	16.7	7.43	1.53	29	59.1	50.2	6.34	190	22.7	4.17	116	5.05	0.64	3.49	0.47	2.63	15.4	0.51	1.53	0.24	1.62	0.26	12.3377	17.9012	12.8405	1.08657	0.512888
T426	86.21	29.6	Granodiorite	50.5	67.72	0.5	15.64	2.94	0.08	0.88	2.06	4.39	4.8	0.14	0.44		9.19	37	0.966452	144	1035	15	2.27	10.8	0.84	44.7	108	28.8	11.1	437	40.7	7.66	117	3.19	1.64	5.69	0.88	4.98	26.4	0.85	2.86	0.38	2.57	0.37	16.553	17.393	12.476	1.29691	0.759446
T446	89.06	29.63	Granodiorite	50.9	64.67	0.63	15.91	4.57	0.08	1.74	3.97	3.42	4.19	0.16	0.29		7.61	43	0.914151	127	584	15.2	3.42	7.83	0.63	24.5	538	19.1	6.26	381	24	5.14	98.6	3	1.1	4.14	0.68	4	23	0.72	2.35	0.35	2.41	0.34	16.5652	10.166	7.29205	1.11086	0.729012
GZ-12-1	91.88	29.44	Granodiorite	51.42	64.9	0.4	16.2	4.5	0.1	1.8	4.9	4.1	2	0.1	0.8	99.9	44.2594	6.1	0.908053	15.14	280	8.21	1.47	4.83	0.4	20.68	38.98	9.28	4.22	300	15.1	2.8	75	2.13	0.91	2.79	0.4	2.47	13.59	0.5	1.49	0.22	1.49	0.23	22.0751	13.8792	9.95554	1.1095	0.995369
GZ-12-2	91.88	29.44	Diorite	50.76	49.4	0.9	17.8	10.3	0.2	5.7	7.9	3.7	1.9	0.3	0.7	98.8	52.3476	5.6	0.789774	56.38	440	1.06	0.41	6.53	0.3	17.16	45.56	6.97	5.98	473	23.9	5.68	78.3	2.18	1.76	5.66	0.81	4.85	25.53	0.95	2.82	0.41	2.64	0.41	18.5272	6.5	4.66245	1.22957	0.948973
JC-12-1	92.33	29.02	Gabbroic diorite	51.28	54.4	0.8	18.1	9.2	0.1	4	7.3	3.2	1.3	0.2	1.6	100.2	46.3251	4.5	0.906288	38.02	327	3.92	1.19	4.76	0.33	12.62	29.9	11.72	3.91	591	16.54	3.84	121.3	3.09	1.16	4.14	0.61	3.74	22.84	0.77	2.29	0.33	2.09	0.32	25.8757	6.03828	4.33125	1.19768	0.889438
KMQ-12-1	92.03	29.35	Monzonite	52.69	63.2	0.4	15.3	4.4	0.1	1.7	3.3	3.7	3.8	0.2	0.9	97.1	43.4055	7.5	0.943209	123.29	472	21.12	4.74	6.71	0.54	16.3	33.41	17.56	4.12	377	15.52	3.36	121.7	3.68	0.88	3.18	0.48	2.92	17.23	0.6	1.81	0.26	1.79	0.28	21.8804	9.10615	6.53183	1.0918	0.823044
WR-12-8	90.72	29.72	Monzonite	52.19	58.4	0.7	15.5	6.4	0.1	3.2	5.6	3.5	3	0.1	0.5	96.9	49.8126	6.5	0.806729	81.97	546	10.79	1.75	6.48	0.47	20.86	44.36	30.11	5.15	379	19.15	4.04	102.3	2.93	1.17	3.84	0.53	3.11	17	0.63	1.78	0.27	1.68	0.27	22.2941	12.4167	8.90647	1.23899	0.908141
XB-12-9	92.31	29.53	Granite	50.76	76.5	0.1	12.5	0.8	0.1	0.2	0.9	3.6	4.5	0	0.4	99.5	33.1669	8.1	1.00443	176.18	165	19.4	3.36	14.27	1.3	12.91	24.41	25.41	2.89	46	9.87	2.08	84.7	3.37	0.32	2.28	0.4	2.8	20.71	0.63	2.14	0.36	2.62	0.44	2.22115	4.92748	3.53448	0.715273	0.449236
XG-12-2	91.71	29.27	Monzonite	64.77	62.9	0.4	16.8	4.6	0.1	1.7	3.5	4.5	2.8	0.2	2.1	99.6	42.3169	7.3	0.999017	56.33	429	5.29	1.41	4.97	0.35	17.89	36.46	12.53	4.25	501	15.35	2.86	164.5	3.8	0.93	2.54	0.36	2.09	12.05	0.44	1.27	0.2	1.31	0.21	41.5768	13.6565	9.79579	1.0678	1.05489
XG-12-3	91.71	29.27	Gabbro	64.77	47.2	0.8	18.7	10.7	0.2	5.1	8.6	2.3	0.9	0.2	4.8	99.4	48.6165	3.2	0.915556	33.02	157	0.63	0.17	2.05	0.21	6.82	17.43	4.69	2.51	633	11.72	3.06	66.4	1.73	1.13	3.71	0.57	3.7	20.38	0.76	2.17	0.31	1.91	0.29	31.0599	3.57068	2.56125	1.29653	1.02531
XG-12-4	91.69	29.32	Monzonite	67.45	61.6	0.6	16.6	5.5	0.1	1.7	4	4.6	2.7	0.2	3.1	100.7	38.0254	7.3	0.933463	58.15	434	6.26	1.82	5.63	0.38	19.25	41.88	8.87	5.05	422	19.49	4.11	172	4.43	1.15	3.82	0.55	3.22	17.84	0.64	1.87	0.26	1.73	0.26	23.6547	11.1272	7.98151	1.24573	0.887297
XG-12-6	91.68	29.33	Granodiorite	66.64	68.8	0.5	15.7	3.7	0.1	1.4	3	3.5	3.5	0.1	1.2	101.5	42.8932	7	1.04526	112.34	452	12.4	2.24	6.75	0.56	22.6	48.33	13.4	5.55	303	20.79	4.11	248.6	6.11	0.94	3.86	0.56	3.39	19.5	0.67	1.95	0.29	1.92	0.29	15.5385	11.7708	8.44321	1.18172	0.721501
08CQ03	85.7581	29.7813	Monzogranite	51.9	67.92	0.46	15.02	3.72	0.12	0.99	2.59	3.51	4.89	0.16	0.77	100.15	34.5671	8.4	0.950742	202.357	490.353	26.7192	2.81699	16.5431	1.32013	45.3978	84.416	30.5625	9.68172	397.498	34.736	6.8413	186.635	5.10871	1.31612	5.6842	0.851286	4.81575	27.2374	0.926251	2.67989	0.396326	2.55791	0.372372	14.5938	17.748	12.7306	1.26007	0.64523
08CQ09	85.7409	29.8953	Monzogranite	50	68.52	0.43	15.12	3.22	0.09	0.93	2.42	3.58	5.07	0.14	0.45	99.97	36.4403	8.65	0.957021	193.116	565.472	25.7865	3.20226	15.5054	1.15909	57.4186	106.652	26.3976	11.8752	386.232	42.2694	7.57686	192.395	5.25846	1.39476	6.11452	0.898709	5.10061	28.0023	0.993201	2.78774	0.430218	2.79501	0.427831	13.7929	20.5433	14.7357	1.22139	0.626466
08CQ13	85.4088	30.1369	Diorite	51.5	54.04	1.05	17.25	8.57	0.2	3.85	6.71	3.26	3.52	0.45	0.96	99.86	47.1395	6.78	0.805902	127.666	582.73	19.6918	3.61912	10.1827	0.698222	49.159	100.135	37.412	11.8094	963.672	45.9149	8.38078	170.514	4.33849	2.0056	6.6431	0.883691	4.60349	23.9992	0.891383	2.36899	0.343157	2.16252	0.325076	40.1544	22.7322	16.3058	1.42476	0.821753
NML03-1	89.0607	29.6225	Diorite	62.4	58.03	0.87	17.68	7.16	0.12	3.14	7.38	2.75	1.09	0.24	1.1	99.56	46.5396	3.84	0.923281	36.735	375.767	6.67068	1.58406	7.47342	0.483762	22.9364	47.4926	14.4235	5.59121	667.069	24.3915	4.93755	174.608	4.25949	1.36319	4.6238	0.706384	4.21281	24.8435	0.890804	2.47652	0.357224	2.42201	0.361682	26.8509	9.46999	6.79282	1.16416	0.872218
Miocene
TG–6	90.04	29.59	Ore-bearing porphyry	15.02	63.86	0.74	17.71	4.67	0.35	2.68	2.17	5.32	2.27	0.24			53.2531	7.59	1.16759	102	567	7.39	3.82	4.48	0.32	28.1	57.6	239	7.15	619	28.6	4.84	81.6	2.46	1.14	3.22	0.39	2.06	7.54	0.29	0.81	0.1	0.49	0.1	82.0955	57.3469	41.1349	2.81376	0.882832
ZK0206–14	90.04	29.59	Ore-bearing porphyry		71.79	0.4	14.12	2.48	0.14	0.81	1.78	3.5	4.82	0.17			39.3331	8.32	0.992241	186	789	29.6	7.53	6.45	0.5	33.1	59.6	172	6.54	539	24	3.58	92.9	3.44	0.77	2.32	0.32	1.38	6.43	0.19	0.6	0.12	0.5	0.12	83.8258	66.2	47.4852	1.84724	0.816825
ZK0206–9	90.04	29.59	Ore-bearing porphyry	15.54	66.25	0.64	16.62	3.18	0.03	1.66	2.08	6.03	3.27	0.24			50.8895	9.3	0.963077	136	852	12	3.05	5.5	0.42	26.7	48.8	22.6	5.88	510	21.8	3.55	34.6	0.88	1.05	2.65	0.4	2.07	8.98	0.32	0.85	0.13	0.69	0.1	56.7929	38.6957	27.7564	2.00787	1.04659
ZK0502–17	90.04	29.59	Ore-bearing porphyry		69.59	0.42	14.37	2.72	0.07	1.42	2.45	3.95	4.8	0.22			50.8918	8.75	0.888716	237	743	46.1	8.81	9.15	0.69	36.9	68.5	43.1	8.15	587	32.4	5.23	119	4.38	1.05	3.28	0.4	1.84	8.04	0.34	0.76	0.11	0.64	0.11	73.01	57.6562	41.3568	1.92421	0.775042
ZK0502–18	90.04	29.59	Ore-bearing porphyry		79.79	0.14	11.66	0.62	0.01	0.29	0.19	0.81	6.46	0.03			48.1461	7.27	1.34201	142	748	8.77	1.9	6.09	0.41	28	55.1	14.8	6.71	2276	26.9	4.16	13.9	0.47	0.79	3.13	0.39	1.7	6.95	0.23	0.65	0.07	0.39	0.06	327.482	71.7949	51.4984	2.91742	0.669317
ZK0502–5	90.04	29.59	Ore-bearing porphyry		68.69	0.48	15.69	2.81	0.11	1.11	3.39	3.74	3.79	0.19			43.9504	7.53	0.954374	175	655	23.7	4.99	6.46	0.51	32.2	60.6	72.8	7.19	662	27.1	4.05	79.1	2.86	0.64	2.66	0.39	1.62	7.45	0.24	0.71	0.08	0.55	0.08	88.8591	58.5455	41.9946	1.97137	0.596122
ZM-1	87.4667	29.6583	Adakite		66.69	0.64	15.28	4.17	0.02	1.75	2.2	4.16	3.57	0.21	0.9	99.6	45.4464	7.73	1.0377	232	880	18	2.97	9	0.69	37.4	65.7	21	8.35	681	31.3	5.57	47.2	1.44	1.36	4.46	0.54	2.7	12.2	0.49	1.29	0.17	0.99	0.13	55.8197	37.7778	27.098	1.82534	0.834195
ZM-10	87.4667	29.6583	Adakite		69.37	0.45	14.14	3.32	0.04	1.34	2.52	3.98	3.65	0.16	0.8	99.8	44.4814	7.63	0.936524	191	838	28.4	8.33	9.77	0.82	34.8	61.5	32.1	7.55	623	27.8	4.69	77.7	2.7	1.07	3.36	0.38	1.98	8.98	0.35	0.92	0.12	0.74	0.1	69.3764	47.027	33.7325	1.79081	0.824046
ZM-12	87.4667	29.6583	Adakite		67.27	0.47	17.12	2.25	0.03	0.97	2.43	5.03	3.75	0.24	0.12	99.7	46.1143	8.78	1.02085	193	652	15	2.83	7.3	0.62	25.4	49.7	23	6.65	824	25.1	4.19	18.3	1.34	1.04	2.69	0.32	1.22	5.06	0.19	0.48	0.06	0.38	0.04	162.846	66.8421	47.9458	2.14878	0.947052
ZM-3	87.4667	29.6583	Adakite		65.37	0.6	15.35	4.27	0.08	1.84	3.7	4.02	3.25	0.21	0.94	99.6	46.1029	7.27	0.909391	141	985	24.6	5.66	9.72	0.77	33.36	63.6	34.4	8.32	884	31.68	6.32	114	3.57	1.1	4.02	0.52	2.72	17.5	0.487	1.26	0.16	1	0.13	50.5143	33.36	23.9291	1.82047	0.667183
ZM-4	87.4667	29.6583	Adakite		67	0.57	14.56	4.06	0.08	1.6	2.88	3.92	3.49	0.19	1.36	99.7	43.8924	7.41	0.940461	158	912	24.5	5.91	9.14	0.73	37.8	68.3	43.9	8.52	752	30.8	5.22	78.6	2.76	1.23	3.98	0.47	2.46	11	0.43	1.13	0.15	0.96	0.14	68.3636	39.375	28.2437	1.71506	0.824996
ZM-5	87.4667	29.6583	Adakite		69.09	0.46	14.67	3.18	0.04	1.2	2.06	3.81	4.2	0.17	0.86	99.7	42.8271	8.01	1.00633	218	848	30.1	4.48	9.83	0.92	38.4	65.9	42.2	8.2	550	28.4	4.79	26.8	0.94	1.08	3.58	0.47	2.3	11	0.41	1.13	0.14	0.94	0.13	50	40.8511	29.3025	1.63763	0.79733
ZM-6	87.4667	29.6583	Adakite		65.1	0.6	15.44	4.31	0.09	1.94	3.69	4	3.19	0.22	1.08	99.7	47.188	7.19	0.921065	142	964	21.7	5.16	9.23	0.69	38.7	69.6	34.9	8.65	878	31.9	5.48	64.7	2.35	1.36	4.02	0.5	2.5	11.2	0.44	1.19	0.15	0.91	0.12	78.3929	42.5275	30.5049	1.83871	0.885848
ZM-7	87.4667	29.6583	Adakite		63.86	0.59	16.01	3.83	0.08	2.35	3	4.27	3.41	0.27	1.98	99.7	54.9141	7.68	0.988923	153	741	24.6	5.39	8.98	0.69	33.6	66.9	42.4	8.15	807	29.2	4.96	67.5	2.74	1.3	3.54	0.45	2.03	9.57	0.38	0.97	0.13	0.83	0.11	84.326	40.4819	29.0377	1.63694	0.948472
ZM-8	87.4667	29.6583	Adakite		71.56	0.31	14.2	2.39	0.03	0.83	1.81	4.32	4	0.11	0.22	99.8	40.8064	8.32	0.963084	227	861	22.3	5.11	8.6	0.82	28	47.4	28	5.41	567	19.2	3.02	26.5	1.11	0.76	2.17	0.25	1.22	6.02	0.23	0.61	0.09	0.6	0.09	94.186	46.6667	33.474	1.36089	0.90762
ZM-9	87.4667	29.6583	Adakite		69.73	0.4	14.35	3.04	0.04	1.08	2.38	4.34	3.85	0.15	0.36	99.7	41.3565	8.19	0.916777	207	857	26	4.84	8.41	0.76	37.2	62.7	29.7	7.45	664	26.5	4.27	46	1.82	1	3.09	0.35	1.64	7.64	0.29	0.77	0.11	0.67	0.1	86.911	55.5224	39.8262	1.63827	0.841648
Cj-02	90	29.6	Monzogranite porphyry	15.6	68.87	0.32	14.59	2.81	0.31	0.9	2.03	1.63	4.35	0.12	1.24	97.17	38.8673	5.98	1.31449	280	555	14.3	5.9	6.9	0.4	20.9	42		4.68	118	18.1	2.97	69	2.3	0.77	2.08	0.21	1.12	5.1	0.14	0.5	0.05	0.44	0.05	23.1373	47.5	34.0717	1.70365	0.947119
Cj-20	90	29.6	Diorite porphyry	14.5	64.9	0.41	15.38	3.74	0.07	0.76	3.24	3.22	4.08	0.15	1.05	97	28.7435	7.3	0.984252	195	711	11.4	2.9	6.9	0.3	20.8	40.2		4.74	309	18.8	3	91.6	3	0.86	2.28	0.23	1.25	5.1	0.15	0.51	0.04	0.44	0.04	60.5882	47.2727	33.9087	1.9014	1.0053
Cj22	90	29.6	Monzogranite porphyry	13.5	67.87	0.35	15.75	1.98	0.09	0.82	2.4	3.7	3.18	0.13	1.13	97.4	45.1181	6.88	1.13235	134	710	10.7	4.4	7.6	0.4	18.3	45.9		4.11	290	16	2.73	72.2	2.5	0.71	1.99	0.2	1.09	5	0.14	0.47	0.04	0.43	0.04	58	42.5581	30.5269	1.69658	0.931267
Dzl-01	91.4	29.5	Quartz monzonite porphyry		72.42	0.3	15.23	1.56	0.03	0.55	0.82	4.3	4.06	0.14	0.33	99.74	41.1717	8.36	1.17395	117	829	8.5	2.2	6.1	0.4	18.6	37.7		3.97	348	16.6	2.51	51	2	0.69	1.89	0.21	1.08	5.8	0.17	0.51	0.08	0.47	0.08	60	39.5745	28.3867	1.53795	0.968512
Dzl-05	91.4	29.5	Quartz monzonite porphyry		71.26	0.29	15.58	1.32	0.04	0.66	2.17	4.42	3.59	0.09	0.1	99.52	49.8126	8.01	1.03045	125	829	8.6	0.3	5.3	0.3	19.4	40.9		4.5	656	16.6	2.63	61	2.1	0.81	2.01	0.2	1.14	6	0.16	0.53	0.09	0.5	0.08	109.333	38.8	27.8312	1.52598	1.07704
Dzl-06	91.4	29.5	Quartz monzonite porphyry	13.4	70.09	0.29	15.78	2.27	0.02	0.66	1.93	3.62	3.61	0.1	0.43	98.8	36.5947	7.23	1.17866	91	691	6.8	1.9	4.9	0.3	17.8	37.8		3.88	490	14.3	2.29	33	1.4	0.65	1.75	0.17	0.99	5.2	0.13	0.47	0.06	0.45	0.06	94.2308	39.5556	28.3732	1.47244	0.992659
Dzl-07	91.4	29.5	Quartz monzonite porphyry		71.51	0.29	15.24	0.88	0.03	0.56	1.77	4.07	4.14	0.09	0.45	99.03	55.8152	8.21	1.05745	132	673	7.5	2.1	6.5	0.3	26.4	55.6		5.78	570	21.8	2.9	40	1.7	0.94	2.59	0.2	1.45	6.8	0.2	0.63	0.08	0.55	0.09	83.8235	48	34.4304	1.7645	1.04858
Jm-16	91.75	29.7	Granite porphyry	15.9	68.29	0.37	14.71	1.59	0.05	1.29	1.3	3.25	7.43	0.17	0.4	98.85	61.6935	10.68	0.932372	434	742	24.6	8.3	7.1	0.5	27.48	44.11		5.5	239	19.16	2.92	111	3.3	0.71	2.11	0.29	1.51	8	0.27	0.75	0.11	0.69	0.12	29.875	39.8261	28.5672	1.46468	0.874479
Jm-21	91.75	29.7	Granite porphyry	15	69.51	0.42	15.1	2.27	0.07	1.17	0.41	3.45	5.73	0.18	1.21	99.52	50.5718	9.18	1.1946	494	701	18.9	3.3	5.8	0.5	19.68	45.48		4.69	448	16.69	2.48	103	3.4	0.57	1.48	0.2	0.95	4.1	0.16	0.42	0.07	0.38	0.06	109.268	51.7895	37.1486	1.67323	0.909582
Jm-23	91.75	29.7	Granite porphyry	15	68	0.38	14.82	1.47	0.04	1.29	2.01	2.31	8.56	0.11	0.42	99.41	63.5302	10.87	0.884781	494	701	12	5.8	7.5	0.5	29.5	52.52		5.79	282	19.44	2.85	108	3.5	0.68	1.83	0.24	1.09	5.5	0.21	0.53	0.09	0.55	0.09	51.2727	53.6364	38.4733	1.32641	0.9103
Jm-7	91.75	29.7	Granite porphyry	15	68.52	0.45	14.91	2.26	0.06	1.22	1.49	3.68	4.24	0.17	1.47	98.47	51.7277	7.92	1.11527	218	957	18.3	3.3	6.1	0.5	28.77	50.25		6.03	320	21.93	3.24	112	3.4	0.79	1.88	0.23	1.1	4.6	0.19	0.48	0.07	0.42	0.07	69.5652	68.5	49.135	1.75291	0.978587
Jmy-01	91.75	29.7	Granite porphyry	15	68.59	0.39	14.62	1.89	0.03	1.36	1.88	3.32	6.21	0.17	0.93	99.39	58.8207	9.53	0.935696	392	823	27.7	8	7.9	0.7	28.24	48.24		5.66	444	19.86	3.05	106	3.5	0.73	1.9	0.25	1.22	5.6	0.212	0.565	0.09	0.537	0.086	79.2857	52.5885	37.7217	1.52055	0.927085
Jmy-04	91.75	29.7	Granite porphyry	15	67.09	0.47	14.62	0.98	0.06	1.43	3.65	6.46	6.68	0.2	0.36	102	74.3364	13.14	0.596139	424	796	26	7.1	8	0.7	31.06	58.63		6.45	267	22.41	3.35	95	3	0.76	2.1	0.27	1.28	6.1	0.23	0.61	0.09	0.57	0.09	43.7705	54.4912	39.0865	1.50297	0.876002
Jmy-07	91.75	29.7	Granite porphyry	15	68.14	0.42	14.44	1.85	0.05	1.41	1.88	2.96	6.55	0.19	1.06	98.95	60.2059	9.51	0.937576	380	930	25.1	8.5	8.3	0.8	25.17	51.64		5.77	409	19.94	2.98	107	3.5	0.76	1.91	0.25	1.17	5.5	0.2	0.56	0.09	0.54	0.09	74.3636	46.6111	33.4341	1.45013	0.973896
Ng-16	90.91	29.49	Monzogranite porphyry		68.46	0.47	15.86	2.27	0.03	0.92	2.88	4.8	2.97	0.17	0.67	99.5	44.5835	7.77	0.969126	51	770	7.2	2.2	4.9	0.2	19.6	45.7		4.84	500	18.9	3.08	95	2.9	0.84	2.08	0.2	1.02	4.3	0.12	0.42	0.03	0.39	0.03	116.279	50.2564	36.0489	1.75045	1.0146
Ng-18	90.91	29.49	Monzogranite porphyry		68.79	0.46	15.76	2.26	0.02	0.75	2.73	4.66	3.28	0.17	0.69	99.57	39.714	7.94	0.972954	53	787	7.1	2.4	4.6	0.2	17.1	41.7		4.41	729	17.5	3.02	94	2.9	0.82	2.03	0.18	0.93	3.9	0.1	0.36	0.02	0.33	0.02	186.923	51.8182	37.1692	1.88618	1.01248
Nmy-01	90.91	29.49	Monzogranite porphyry	16	69.71	0.37	15.33	1.93	0.02	1.15	1.91	4.5	3.43	0.14	1.03	99.52	54.1874	7.93	1.04971	97	989	9.4	0.8	5	0.5	17.39	34.4		3.93	564	14.27	2.45	150	4.4	0.69	1.64	0.21	1.04	5	0.18	0.48	0.08	0.47	0.07	112.8	37	26.5401	1.48099	1.05237
Nmy-02	90.91	29.49	Monzogranite porphyry		69.24	0.38	15.78	2.33	0.01	0.81	0.38	4.47	4.37	0.14	1.13	99.04	40.8314	8.84	1.23398	144	1000	13.8	1.2	5.1	0.5	6.03	13.98		1.46	1000	5.51	1.06	125	3.9	0.29	0.76	0.11	0.57	3.2	0.11	0.32	0.05	0.35	0.06	312.5	17.2286	12.358	1.08999	0.987784
Nmy-04	90.91	29.49	Monzogranite porphyry		68.75	0.42	15.79	1.99	0.03	1.34	1.37	4.84	3.82	0.16	0.86	99.37	57.2041	8.66	1.08128	134	884	14.4	1.6	5.9	0.5	18.4	34.2		4.06	599	15.23	2.43	98	3.4	0.64	1.49	0.17	0.84	4.2	0.16	0.4	0.06	0.41	0.07	142.619	44.878	32.191	1.37123	1.02827
Nmy-05	90.91	29.49	Monzogranite porphyry		69.58	0.38	15.51	3.28	0.02	1.27	0.49	4.44	4.11	0.15	1.15	100.38	43.4583	8.55	1.22543	137	789	11.1	1.4	4.7	0.5	9.03	16.91		1.98	789	7.28	1.31	106	3.5	0.35	0.87	0.12	0.65	3.4	0.12	0.35	0.06	0.36	0.06	232.059	25.0833	17.9923	1.20844	1.0023
Nmy-07	90.91	29.49	Monzogranite porphyry		70.07	0.36	15.18	1.45	0.02	1.09	1.08	3.95	4.93	0.13	0.97	99.23	59.8751	8.88	1.0988	149	892	8.2	1.8	4.5	0.5	15.89	28.49		3.48	501	12.6	2.08	88	3.3	0.6	1.45	0.18	0.91	5	0.17	0.46	0.07	0.45	0.07	100.2	35.3111	25.3286	1.35346	1.05623
Nty-01	90.91	29.49	Monzogranite porphyry		72.18	0.3	14.94	1.07	0.01	0.61	0.34	4.45	4.53	0.05	1.19	99.67	53.0884	8.98	1.16212	112	887	7.9	2	5.2	0.5	5.52	11.2		1.35	887	5.71	1.04	84	3	0.29	0.7	0.11	0.53	2.9	0.11	0.3	0.05	0.34	0.06	305.862	16.2353	11.6456	1.04331	1.0391
Nty-04	90.91	29.49	Monzogranite porphyry		71.24	0.2	14.66	1.31	0.03	0.7	1.68	4.24	3.07	0.07	1.44	98.64	51.4733	7.31	1.09675	89.9	723	5.5	2.4	3.4	0.5	8.64	17		2.09	523	7.7	1.27	64	2.6	0.35	0.85	0.11	0.53	2.9	0.1	0.27	0.05	0.3	0.05	180.345	28.8	20.6582	1.18241	1.02987
Nty-05	90.91	29.49	Monzogranite porphyry		66.94	0.45	15.94	3.11	0.03	1.36	3.06	4.39	3.06	0.18	0.92	99.44	46.4687	7.45	0.989064	97.4	892	9.5	0.8	4.5	0.5	19.18	40.42		4.89	892	18.58	3.06	115	3.9	0.84	2.03	0.24	1.19	5.9	0.23	0.57	0.09	0.53	0.08	151.186	36.1887	25.9581	1.50275	1.03037
Nty-08	90.91	29.49	Monzogranite porphyry		70.01	0.28	14.64	1.98	0.01	0.61	0.4	3.41	6.57	0.12	1	99.03	37.9483	9.98	1.08704	194	1096	11.9	0.9	5.3	0.5	8.26	20.8		2.33	1096	8.78	1.5	102	4	0.34	0.92	0.12	0.63	3.2	0.12	0.33	0.06	0.38	0.07	342.5	21.7368	15.5918	1.10961	0.884836
Nty-11	90.91	29.49	Monzogranite porphyry		70.2	0.38	14.93	2.14	0.02	1.25	1.91	4.64	3.02	0.14	0.94	99.57	53.6929	7.66	1.03756	93.8	632	11.6	2.2	4	0.5	14.19	26.81		2.96	632	10.65	1.68	85	3	0.48	1.06	0.15	0.72	3.4	0.13	0.35	0.05	0.34	0.05	185.882	41.7353	29.9367	1.41732	1.09966
PI-28	90.91	29.49	Monzogranite porphyry		66.49	0.57	16.28	3.77	0.01	0.85	1.07	3.05	3.33	0.22	1.75	97.39	30.9182	6.38	1.53874	120	621	13.7	3.1	8	0.4	33.1	64.5		7.74	469	29.4	4.82	102	3.3	1.13	3.39	0.32	1.64	6.9	0.22	0.68	0.07	0.56	0.06	67.971	59.1071	42.3975	1.96007	0.854631
Pl-18	90.91	29.49	Monzogranite porphyry		68.43	0.4	16.3	2.4	0.04	0.96	2.25	5.11	2.6	0.13	0.35	98.97	44.2594	7.71	1.06353	41	785	8.5	2.4	6.3	0.3	16.9	47.4		4.32	523	15.6	2.9	102	3	0.77	2.15	0.24	1.26	6.2	0.18	0.61	0.06	0.6	0.06	84.3548	28.1667	20.2039	1.40551	0.942749
QL1001-522	91.6142	29.6	Ore-bearing porphyry	16.8	71.5	0.28	13.3	2.02	0.05	0.96	2.23	3.45	4.78	0.11	2.18		48.5437	8.23	0.891158	107	749	17.3	3.98	5.51	0.47	20	40.1	31	4.46	554	16.7	2.7	76.6	2.45	0.58	1.74	0.22	1.18	5.96	0.21	0.59	0.08	0.54	0.08	92.953	37.037	26.5667	1.46253	0.818079
QL601-328	91.6142	29.6	Ore-bearing porphyry	16.8	65.7	0.43	14.7	2.98	0.05	1.32	3.12	3.76	4.51	0.19	3.03		46.7884	8.27	0.876958	111	744	6.45	3.57	3.72	0.35	20.3	44.4	35.7	5.34	788	21.4	3.67	57.5	1.98	0.8	2.27	0.26	1.34	6.08	0.24	0.63	0.08	0.51	0.08	129.605	39.8039	28.5513	1.75853	0.847359
BP07	92.05	29.8	Ore-bearing porphyry	14	67.63	0.34	14.73	2.33	0.11	0.75	2.34	3.26	4.46	0.12	3.41	99.6	38.986	7.72	1.01832	253	590	33	5	6.2	0.5	26	54.1	101	5.46	387	20.1	3.35	31.4	1.3	0.63	2.19	0.26	1.32	6.5	0.23	0.65	0.09	0.64	0.1	59.5385	40.625	29.1403	1.38041	0.711082
BP08	92.05	29.8	Ore-bearing porphyry	14	66.5	0.49	15.85	5.26	0.01	0.82	0.25	0.19	4.65	0.19	5.05	99.33	23.6325	4.84	2.72633	298	642	43.6	5.08	10.1	0.7	71.7	124	9	13.35	50.1	44.1	6.65	249	6.3	1.36	3.95	0.48	2.29	11.8	0.41	1.14	0.15	0.99	0.17	4.24576	72.4242	51.9499	1.54816	0.811247
BP09	92.05	29.8	Ore-bearing porphyry	14	64.2	0.48	14.55	4.53	0.04	1.78	2.44	1.14	3.47	0.22	6.17	99.14	43.8203	4.61	1.44272	251	935	42.7	7.3	9.4	0.7	70.4	129.5	56	13.75	195	46.1	7.42	215	5.5	1.88	4.24	0.47	2.37	12.1	0.42	1.12	0.14	0.97	0.15	16.1157	72.5773	52.0597	1.63528	1.0247
BP15	92.05	29.8	Ore-bearing porphyry	14	70.3	0.26	13.75	3.15	0.02	0.83	1.1	2.88	3.24	0.09	4.68	100.37	34.3422	6.12	1.3405	232	397	37.3	5.58	8.4	0.7	36.8	64.6	39	6.74	168	22.2	3.46	115	3.5	0.66	2.08	0.24	1.1	6.3	0.21	0.55	0.09	0.64	0.1	26.6667	57.5	41.2447	1.15034	0.752139
BP16	92.05	29.8	Ore-bearing porphyry	14	73.4	0.35	9.98	2.92	0.02	1.59	0.72	0.5	5.39	0.09	3.29	98.29	51.944	5.89	1.2502	308	428	3.28	1.73	2.6	0.1	17.1	31.9	22	4	53.2	15.7	3.65	103	3	0.73	3.58	0.57	3.45	21.8	0.79	2.51	0.37	2.49	0.41	2.44037	6.86747	4.92603	0.927331	0.617389
001-23A-1b	91.6	29.63	Barren adakite		66.27	0.44	16.31	2.11	0.02	1.35	3.74	4.2	3.5	0.18	1.34	99.46	55.9483	7.7	0.930952	91.2	831	8.7	2.6	3.89	0.4	26.8	53.6	14.3	6.5	915	24.7	3.8	49	1.6	0.75	2.3	0.3	1.6	8.14	0.3	0.8	0.12	0.8	0.13	112.408	33.5	24.0295	1.33858	0.775585
2009-37b	91.6	29.63	Ore-bearing adakite		64.93	0.5	16.4	4.09	0.02	1.42	3.11	3.99	2.9	0.2	1.93	99.48	40.8	6.89	1.06662	91.8	705	8.24	1.97	3.8	0.3	21.3	45.2	17.1	5.73	932	23.2	3.77	67.3	2.1	0.86	2.35	0.31	1.5	7.41	0.28	0.71	0.1	0.66	0.11	125.776	32.2727	23.1492	1.52112	0.883319
4406-1c	91.6	29.63	Barren adakite		64.7	0.46	17.03	4.32	0.05	1.47	3.97	4.72	1.42	0.222	0.85	99.39	40.3153	6.14	1.02981	40.4	450	3.7	0.4	3.8	0.24	13.1	29.2	11	3.65	1065	15.4	2.91	1.4	0.1	0.79	2.08	0.25	1.33	7.2	0.25	0.68	0.1	0.61	0.1	147.917	21.4754	15.4043	1.45927	0.981686
4406-2c	91.6	29.63	Barren adakite		62.99	0.54	16.58	4.85	0.05	1.72	3.98	4.55	2.7	0.243	1.63	100.05	41.3139	7.25	0.938603	70.1	710	6.8	2.1	4.3	0.27	19.1	42.1	14.2	5.38	1110	22.1	3.98	7.1	0.6	0.98	2.54	0.29	1.46	7.5	0.27	0.69	0.09	0.61	0.1	148	31.3115	22.4597	1.60191	0.942305
4406-3c	91.6	29.63	Barren adakite		63.77	0.51	16.57	3.97	0.05	1.61	4.29	4.7	2.67	0.224	1	99.57	44.5991	7.37	0.898423	62.7	640	5.9	1.7	4.1	0.27	19	41	13.6	5.07	1055	20.6	3.62	6.9	0.5	0.93	2.37	0.27	1.36	7.1	0.25	0.64	0.09	0.58	0.09	148.592	32.7586	23.4977	1.56937	0.970685
4406-4c	91.6	29.63	Barren adakite		66.01	0.49	16.49	3.62	0.05	1.31	3.5	4.44	3.17	0.224	0.53	100	41.8047	7.61	0.96324	74.7	720	6.7	1	4.3	0.3	19	40	13.3	4.97	1015	19.9	3.41	7.1	0.6	0.88	2.19	0.26	1.27	6.3	0.23	0.58	0.08	0.51	0.08	161.111	37.2549	26.7229	1.66667	0.98448
609-38c	91.6	29.63	Ore-bearing adakite		61.8	0.48	16.1	2.1	0.02	1.41	3.98	5.95	3.28	0.25	4.11	99.65	57.1335	9.23	0.781662	99.4	583	5.29	2.18	3.51	0.27	21.26	42.83	31.6	5.37	969.8	21.11	3.468	57	1.86	0.87	2.02	0.268	1.315	6.44	0.235	0.595	0.088	0.556	0.089	150.59	38.2374	27.4277	1.58295	1.00491
803-27b	91.6	29.63	Ore-bearing adakite		63.86	0.53	15.78	2.08	0.02	1.51	3.35	3.47	4.55	0.22	4.27	99.64	59.0345	8.02	0.942217	145.3	707	4.92	1.15	3.63	0.27	17.81	37.86	26.5	4.964	850.4	19.81	3.236	81.5	2.19	0.74	1.98	0.24	1.186	6.01	0.22	0.563	0.081	0.523	0.086	141.498	34.0535	24.4266	1.51774	0.893755
803-28b	91.6	29.63	Ore-bearing adakite		70.77	0.37	12.97	1.5	0.01	1.16	3.31	3.54	3.74	0.15	1.98	99.5	60.554	7.28	0.815154	92.8	629	5.03	1.73	2.94	0.25	15.75	31.91	29.3	4.1	756.9	15.99	2.691	46.8	1.44	0.613	1.602	0.211	1.005	4.96	0.187	0.473	0.067	0.446	0.071	152.601	35.3139	25.3306	1.50816	0.902601
803-29c	91.6	29.63	Ore-bearing adakite		65.9	0.38	14.25	1.75	0.02	1.18	3.29	4.86	4.2	0.19	3.5	99.68	57.2375	9.06	0.768383	105.7	644	5.44	1.4	3.04	0.24	15.9	32.77	39.7	4.078	840.4	17.05	2.872	69.6	1.97	0.708	1.829	0.237	1.163	5.97	0.213	0.561	0.078	0.511	0.082	140.771	31.1155	22.3191	1.52326	0.944404
803-30c	91.6	29.63	Ore-bearing adakite		64.2	0.45	15.55	1.92	0.02	1.21	3.48	4.29	4.03	0.22	3.46	99.07	55.5753	8.32	0.875105	109.4	903	8.14	2.44	3.52	0.25	32.43	64.2	29.5	7.725	1156	30.7	4.435	61.4	1.83	0.937	2.321	0.267	1.206	5.73	0.208	0.51	0.073	0.446	0.072	201.745	72.713	52.157	1.80979	0.892851
803-31c	91.6	29.63	Ore-bearing adakite		68.3	0.3	12.1	0.98	0.01	0.92	2.46	2.77	6.18	0.19	2.96	97.31	65.078	8.95	0.768558	145.2	747	6.28	1.32	3.03	0.24	16.4	32.27	31.6	4.065	590.4	16.08	2.567	41.9	1.36	0.583	1.472	0.193	0.922	4.47	0.173	0.436	0.061	0.384	0.064	132.081	42.7083	30.6347	1.607	0.916907
803-32c	91.6	29.63	Ore-bearing adakite		64.1	0.41	14.75	1.69	0.01	1.18	3.34	5.35	4.07	0.19	3.94	99.21	58.0892	9.42	0.764187	105.6	681	3.62	1.65	2.85	0.23	15.39	32.45	38.9	4.259	856.8	17.3	2.942	63.1	1.66	0.717	1.786	0.24	1.189	6.36	0.219	0.587	0.082	0.551	0.087	134.717	27.931	20.0349	1.44426	0.95627
803-33c	91.6	29.63	Ore-bearing adakite		67	0.38	13.95	1.77	0.01	1.01	2.93	3.27	5.07	0.19	2.93	98.67	53.1115	8.34	0.860158	125.2	648	7.09	1.6	3.55	0.28	16.08	33.81	36.6	4.37	694	17.84	2.914	42.6	1.36	0.636	1.787	0.229	1.153	5.46	0.207	0.523	0.077	0.513	0.08	127.106	31.345	22.4838	1.50427	0.852067
803-34b	91.6	29.63	Ore-bearing adakite		65.77	0.48	15.03	1.66	0.02	1.5	3.48	3.77	4.45	0.19	3.17	99.53	64.2056	8.22	0.865307	113.2	584	5.95	1.65	3.9	0.28	21.3	43.37	47.9	5.367	893.6	21.71	3.462	66.4	1.82	0.807	2.023	0.266	1.288	6.46	0.238	0.634	0.092	0.576	0.089	138.328	36.9792	26.5251	1.49661	0.932257
803-35b	91.6	29.63	Ore-bearing adakite		65.01	0.49	16.46	1.59	0.02	1.6	3.63	4.22	3.9	0.2	2.38	99.49	66.6394	8.12	0.925432	108.4	616	5.62	2.18	3.99	0.33	20.05	41.22	29.5	5.35	936.2	21.52	3.46	63.1	2	0.859	2.025	0.271	1.326	6.52	0.251	0.607	0.091	0.574	0.093	143.589	34.9303	25.0555	1.54613	0.992125
803-36c	91.6	29.63	Ore-bearing adakite		68.3	0.48	15.4	2.04	0.01	1.32	1.51	4.15	4.91	0.27	1.88	100.43	56.2258	9.06	1.03317	125.3	863	8.14	2.45	3.73	0.27	19.98	41.43	33.9	5.437	837.4	21.63	3.557	97	2.64	0.811	1.953	0.253	1.199	5.5	0.212	0.534	0.075	0.529	0.081	152.255	37.7694	27.092	1.51698	0.940701
805-24b	91.6	29.63	Ore-bearing adakite		67.75	0.46	14.59	1.67	0.03	1.5	2.83	3.17	5.68	0.17	1.6	99.44	64.0674	8.85	0.882466	151	646	6.57	1.65	3.24	0.27	22.72	45.59	43.5	5.72	722.1	22.53	3.526	51.2	1.56	0.884	2.019	0.258	1.213	5.69	0.216	0.526	0.076	0.483	0.08	126.907	47.0393	33.7413	1.68085	1.0129
805-25b	91.6	29.63	Ore-bearing adakite		64.5	0.5	16.34	2.26	0.04	1.29	3.79	3.95	4.04	0.19	2.65	99.54	53.1191	7.99	0.918729	119.3	732	5.27	2.56	4.23	0.29	21.98	45.19	123	5.707	874.2	22.58	3.704	51.1	1.48	0.891	2.208	0.272	1.368	6.75	0.24	0.601	0.086	0.55	0.09	129.511	39.9636	28.6659	1.66471	0.952503
805-26b	91.6	29.63	Ore-bearing adakite		67.87	0.41	14.65	1.44	0.02	1.17	2.99	3.55	4.97	0.16	2.25	99.47	61.7278	8.52	0.87833	123.8	727	6.74	2.14	3.08	0.24	16.75	33.19	26.9	4.108	824.9	17.01	2.733	42.5	1.34	0.627	1.643	0.209	1.028	5.14	0.188	0.481	0.067	0.447	0.07	160.486	37.472	26.8787	1.53922	0.904592
QL105Ha	91.6	29.63	Barren adakite		63.5	0.53	16.6	3.57	0.04	1.55	4.06	6.55	2.54	0.04	1.18	100.2	46.2903	9.09	0.793235	78.5	674	7.49	2.44	4.4	0.3	25.4	54.8	13	6.68	1150	26.2	4.53	110	3.3	1.07	2.89	0.34	1.78	8.8	0.31	0.91	0.12	0.85	0.12	130.682	29.8824	21.4346	1.40157	0.904085
QL67Ha	91.6	29.63	Barren adakite		65	0.5	16.4	3.33	0.04	1.52	3.87	4.81	2.75	0.19	0.81	99.2	47.5367	7.56	0.913843	63.2	750	7.41	1.79	4.1	0.3	23.4	48.8	14	5.64	1140	22.8	3.79	110	3.1	1.02	2.5	0.27	1.46	7.6	0.27	0.82	0.12	0.68	0.11	150	34.4118	24.6835	1.43701	1.01306
QL69Ha	91.6	29.63	Barren adakite		64.8	0.46	16.1	3.05	0.04	1.35	3.67	6.33	2.77	0.04	0.78	99.4	46.7698	9.1	0.800825	63.9	768	5.78	1.32	3.4	0.2	20.1	39.6	15	4.58	1105	17.7	3.24	99	2.8	0.84	2.05	0.23	1.19	6.2	0.21	0.64	0.08	0.64	0.1	178.226	31.4062	22.5277	1.24446	0.996445
QL76Ha	91.6	29.63	Barren adakite		66.9	0.49	15.85	3.28	0.04	1.43	3.45	4.49	3.02	0.18	0.74	99.9	46.3933	7.51	0.935229	77.3	756	8.31	1.81	3.9	0.3	23.6	48	13	5.66	1035	21.7	3.83	98	2.8	0.97	2.58	0.29	1.3	7.6	0.26	0.74	0.1	0.71	0.11	136.184	33.2394	23.8426	1.22546	0.943379
QL79Ha	91.6	29.63	Barren adakite		64.8	0.48	16.3	3.28	0.05	1.5	3.75	6.15	2.73	0.04	0.72	99.8	47.5837	8.88	0.818666	71.2	737	7.19	1.9	3.5	0.2	20.8	41.3	13	4.83	1095	19	3.46	114	3.3	0.89	2.34	0.25	1.28	6.5	0.22	0.62	0.1	0.61	0.09	168.462	34.0984	24.4587	1.40441	0.956242
QL85Ha	91.6	29.63	Barren adakite		63.4	0.53	16.7	3.47	0.04	1.62	4.12	6.4	2.58	0.05	0.78	99.7	48.0989	8.98	0.801617	63.6	759	7.86	1.91	4	0.3	23.3	48	15	5.67	1175	22.7	4.08	103	3	1	2.63	0.28	1.44	7.8	0.25	0.77	0.11	0.6	0.1	150.641	38.8333	27.8551	1.6063	0.933288
QL90Ha	91.6	29.63	Barren adakite		65.5	0.51	16.85	3.48	0.05	1.56	3.87	4.91	2.69	0.05	0.57	100	47.0859	7.6	0.933745	68.3	896	5.09	1.45	3.5	0.2	21.1	44.3	14	5.22	1195	20.5	3.83	101	2.7	0.98	2.5	0.26	1.48	7.5	0.25	0.75	0.1	0.68	0.1	159.333	31.0294	22.2574	1.45669	0.968234
CJZK1119-01	90	29.6	Monzogranite porphyry		68.75	0.32	14.51	2.39	0.11	0.89	1.67	0.38	6.2	0.126	3.94	99.4	42.5025	6.58	1.39592	327	830	15	4.3	3.9	0.25	22.4	44.4	120.5	5.14	189	18.8	2.95			0.65	1.73	0.19	0.89	4.6	0.15	0.37	0.05	0.29	0.05	41.087	77.2414	55.4052	2.05403	0.879636
CJZK1119-03	90	29.6	Monzogranite porphyry		66.73	0.32	14.88	2.15	0.05	1.2	2.52	0.68	5.9	0.133	5.12	99.79	52.5603	6.58	1.22865	340	760	16.1	3.9	4	0.29	21.2	41.3	27.9	4.79	194.5	17.9	2.97			0.66	1.71	0.19	0.95	4.9	0.17	0.43	0.06	0.4	0.06	39.6939	53	38.0169	1.58957	0.895347
CJZK1119-04	90	29.6	Monzogranite porphyry		71.19	0.33	14.2	1.73	0.05	0.8	1.1	0.12	6.18	0.141	3.59	99.52	47.8609	6.3	1.59426	326	600	28.7	4.8	4.1	0.28	20	38	119.5	4.39	148.5	16.8	2.92			0.59	1.68	0.18	0.84	4.3	0.15	0.38	0.05	0.34	0.05	34.5349	58.8235	42.1941	1.65354	0.814385
CJZK1119-05	90	29.6	Monzogranite porphyry		67.2	0.38	15.35	1.61	0.05	0.93	2.06	0.19	6.6	0.164	4.22	98.87	53.4158	6.79	1.36731	322	770	26.2	3.4	3.1	0.22	24.1	49.5	619	5.91	253	22.3	3.74			0.79	2.21	0.24	1.12	5.4	0.19	0.48	0.07	0.38	0.06	46.8519	63.4211	45.4919	1.97265	0.840076
CJZK1119-06	90	29.6	Monzogranite porphyry		66.72	0.38	15.05	2.19	0.02	1.02	2.57	4	4.86	0.169	2.8	99.95	48.0398	8.86	0.910172	229	910	24.8	5.1	4.6	0.29	31.6	60.9	28.6	6.98	765	25.8	4.2			0.84	2.39	0.26	1.29	6.5	0.22	0.56	0.08	0.49	0.08	117.692	64.4898	46.2585	1.76201	0.810549
CJZK1119-07	90	29.6	Monzogranite porphyry		68.31	0.35	15.07	2.07	0.02	0.84	1.58	4.91	3.66	0.142	2.62	99.72	44.6147	8.57	1.00957	176.5	730	24.4	4.2	4.1	0.28	26.7	50.6	20.3	5.72	508	21.1	3.31			0.66	1.84	0.2	0.91	4.6	0.16	0.41	0.06	0.35	0.05	110.435	76.2857	54.7197	1.74016	0.817607
CJZK1119-08	90	29.6	Monzogranite porphyry		67.75	0.38	14.82	1.78	0.01	1.05	2.49	4.04	4.49	0.158	2.49	99.63	53.9375	8.53	0.923138	208	850	29.5	5.5	3.6	0.24	28.3	54.7	25.8	6.31	674	23.6	3.88			0.8	2.23	0.25	1.17	6	0.2	0.51	0.07	0.44	0.07	112.333	64.3182	46.1354	1.77971	0.831468
CJZK1119-10	90	29.6	Monzogranite porphyry		67.22	0.36	14.3	2.08	0.02	0.94	2.29	3.43	4.73	0.158	3.65	99.33	47.2878	8.16	0.956744	229	770	26	5.5	3.6	0.23	28.5	54.8	33.3	6.3	569	23.4	3.78			0.8	2.15	0.24	1.15	5.7	0.19	0.5	0.07	0.43	0.07	99.8246	66.2791	47.5419	1.78997	0.857923
CJZK1119-11	90	29.6	Monzogranite porphyry		66.09	0.4	14.52	2.11	0.02	0.99	2.58	3.95	4.46	0.166	3.72	99.14	48.2235	8.41	0.905392	204	700	24.7	3.8	3.7	0.24	26	49.9	33.8	5.82	638	21.6	3.59			0.76	2.15	0.25	1.15	5.7	0.2	0.49	0.07	0.4	0.06	111.93	65	46.6245	1.92421	0.836317
CJZK1119-12	90	29.6	Monzogranite porphyry		66.89	0.4	14.81	2.15	0.01	1.02	2.48	4.14	4.43	0.167	3.06	99.73	48.5001	8.57	0.917873	204	820	25	4.4	3.7	0.24	27.8	53.8	32.8	6.23	695	23.3	3.77			0.81	2.2	0.25	1.15	5.6	0.19	0.48	0.06	0.39	0.06	124.107	71.2821	51.1306	1.97355	0.859858
CJZK1407-02	90	29.6	Monzogranite porphyry		75.3911	0.364157	11.8163	2.69785	0.0396033	0.738939	0.72445	0.198016	4.29261	0.135231	3.22154	99.6197	35.2208	4.49062	1.87463	313.6	500.9	22.9	4.56	6.124	0.515	23.36	44.74	662.7	5.214	72.25	20.38	3.094	94.82	2.562	0.553	1.53	0.205	0.952	4.502	0.176	0.46	0.062	0.422	0.069	16.0484	55.3555	39.7064	1.50987	0.777039
ZN01	87.45	29.6	Diorite porphyry		72.03	0.41	14.01	1.02	0.86	2.15	3.06	0.14	0.94	99.8			45.3	1.08	2.05308	100	653	14.1	2.81	10.1	0.93	43.4	71.8	20	9.76	174	35.5	6.54	206	5.29	1.22	5.46	0.88	5.18	26.4	1	2.62	0.4	2.43	0.3	6.59091	17.8601	12.811	1.42672	0.624163
ZN02	87.45	29.6	Diorite porphyry		73.23	0.27	13.27	0.86	0.41	0.95	5.52	0.073	1.17	99.8			38	1.243	1.15956	247	846	15.2	3.35	9.88	0.96	50.2	78.7	22.7	10.1	173	35.8	6.58	163	4.53	1.19	5.14	0.78	4.67	23.5	0.91	2.41	0.37	2.35	0.32	7.3617	21.3617	15.3227	1.33004	0.62557
ZN03	87.48	29.66	Diorite porphyry		73.3	0.24	13.24	1.51	0.17	0.5	4.52	0.066	1.64	99.3			16.7	1.706	1.30817	288	799	11.3	2.05	10.9	0.93	46.2	75.5	24.7	9.86	81.2	36.4	6.89	200	5.3	1.26	5.58	0.9	5.48	27.6	1.07	2.84	0.43	2.77	0.36	2.94203	16.6787	11.9636	1.32409	0.621252
ZN04	87.48	29.66	Diorite porphyry	14.4	74.99	0.23	12.48	1.06	0.13	0.79	5.48	0.06	1.11	99.6			22.8	1.17	1.10593	303	870	8.3	1.94	9.67	0.86	40.4	66.4	33.2	8.72	41.2	31.2	6.01	186	5.01	1.24	4.89	0.77	4.64	24.8	0.94	2.55	0.38	2.44	0.33	1.66129	16.5574	11.8766	1.27275	0.699284
ZN05	87.48	29.66	Grano diorite porphyry		71.35	0.44	14.42	0.72	1.32	1.16	5.43	0.13	0.56	99.8			61.1	0.69	1.34617	266	615	23.8	6.1	8.78	0.96	25.3	42	20.4	5.94	388	22	3.78	122	3.66	0.9	2.57	0.36	1.82	8.58	0.32	0.83	0.12	0.8	0.1	45.2214	31.625	22.6846	1.52264	0.882782
ZN06	87.5	29.7	Grano diorite porphyry		71.57	0.42	13.98	0.94	1.2	1.51	4.17	0.15	0.57	99			55.6	0.72	1.65236	202	565	23.6	6.52	7.98	0.93	28.8	47.2	18.7	6.44	380	23	3.82	78.2	3.12	0.9	2.73	0.36	1.82	9.06	0.33	0.89	0.13	0.86	0.11	41.9426	33.4884	24.0212	1.41641	0.852027
ZN07	87.5	29.7	Grano diorite porphyry		71.67	0.31	14.47	0.69	0.76	1.18	4.9	0.1	0.8	99.1			53.1	0.9	1.45316	234	602	20.2	8.33	10.5	1.6	27.3	44.5	22.1	6.09	288	21.8	3.81	116	3.63	0.78	2.78	0.39	2.11	10.8	0.38	1.03	0.16	1.1	0.15	26.6667	24.8182	17.8021	1.28382	0.732712
ZN8	87.5	29.7	Monzogranite porphyry		68.59	0.49	15.62	1.68	1.48	1.74	3.55	0.17	1.29	99.8			60.4	1.46	1.91761	117	661	27.1	8.16	8.45	0.98	34.6	56.4	26.7	7.63	418	28	4.88	143	4.13	1.09	3.27	0.42	2.19	10.5	0.39	0.98	0.14	0.88	0.11	39.8095	39.3182	28.2029	1.66562	0.834193
ZN9	87.52	29.6	Monzogranite porphyry	16.2	68.62	0.48	15.27	2.11	1.34	1.55	3.59	0.16	1.54	99.8			58.8	1.7	1.80215	138	648	26.6	8.4	8.79	1.02	41.8	67.1	30.5	8.89	443	31.4	5.27	155	4.58	1.11	3.63	0.46	2.27	10.3	0.39	0.99	0.14	0.85	0.1	43.0097	49.1765	35.2743	1.7874	0.775868
ZN10	87.52	29.72	Monzogranite porphyry		68.92	0.44	14.92	1.34	1.13	2.47	3.89	0.16	0.91	99.6			46.9	1.07	1.78982	186	931	28.6	8.85	8.24	0.88	31.6	52.8	24.1	7.24	622	26.4	4.29	138	4.08	0.92	2.84	0.35	1.66	7.8	0.28	0.76	0.11	0.7	0.092	79.7436	45.1429	32.381	1.58718	0.805793
ZN11	87.5313	29.708	Diorite porphyry		64.72	0.7	16.69	1.86	2.45	2.58	3.43	0.24	1.14	99.7			56.1	1.38	2.11819	209	694	15.8	10.3	8.89	0.77	31.4	54.1	10.6	7.86	668	29.4	5.2	168	4.51	1.19	3.78	0.53	2.75	13.5	0.5	1.31	0.19	1.15	0.15	49.4815	27.3043	19.5854	1.60048	0.820584
ZN12	87.5392	29.7167	Diorite porphyry		64.98	0.67	16	2.71	2.44	2.05	3.64	0.21	1.9	99.7			61.8	2.11	1.77046	256	616	11.9	5.07	8.83	0.69	37.5	58.5	16.8	7.94	543	29	5.06	191	4.75	1.1	3.54	0.47	2.57	12.3	0.47	1.18	0.16	1.03	0.13	44.1463	36.4078	26.1153	1.66998	0.794583
ZN13	87.5471	29.7255	Diorite porphyry		64.32	0.67	16.08	2.08	2.29	2.21	3.39	0.21	1.95	98.9			55.7	2.16	1.86195	141	778	15.4	5.26	9.05	0.81	24.8	43.9	25.1	6.62	475	26.1	4.99	181	4.98	1.19	3.45	0.49	2.71	12.8	0.49	1.23	0.17	1.08	0.13	37.1094	22.963	16.4713	1.67943	0.876821
ZN14	87.555	29.7342	Diorite porphyry		65.74	0.6	16.54	2.74	1.86	2.52	3.32	0.2	1.32	99.8			67.1	1.52	2.1182	210	821	27.3	8.45	9.86	0.94	36.9	59.9	25	8.3	778	30.2	5.1	176	5.08	1.19	3.63	0.49	2.53	12.7	0.46	1.2	0.17	1.1	0.15	61.2598	33.5455	24.0621	1.53937	0.845536
BR05-2	89.95	29.57	Ore-bearing adakitic porphyry		71.67	0.26	13.28	1.56	0.02	0.78	1.78	3.41	4.39	0.15	2.23	99.53	49.8126	7.8	0.97534	245	673	53.4	11.78	8.87	0.64	37.9	69.2	64.5	7.78	394	26.2	4.09	145	4.84	0.77	2.55	0.27	1.06	6.12	0.18	0.5	0.08	0.59	0.09	64.3791	64.2373	46.0774	1.20246	0.728925
BR05-3	89.95	29.57	Ore-bearing adakitic porphyry		65.58	0.44	15.58	2.67	0.03	1.36	2.89	4.47	3.35	0.16	3.03	99.56	50.2764	7.82	0.958598	107	874	19.6	4.49	5.82	0.36	28.2	54.7	33.8	6.28	833	22.1	3.82	148	4.3	0.92	2.39	0.29	1.23	7	0.22	0.61	0.1	0.62	0.09	119	45.4839	32.6256	1.32779	0.930852
BR05-4	89.95	29.57	Ore-bearing adakitic porphyry		67.08	0.46	15.75	3.08	0.03	1.46	2.88	4.14	3.65	0.19	0.8	99.52	48.4794	7.79	0.983311	135	852	29.4	4.91	7.89	0.54	31.6	62	33	7.22	782	26.2	4.53	142	4.24	1.05	3	0.34	1.52	8	0.27	0.71	0.11	0.72	0.1	97.75	43.8889	31.4815	1.41295	0.870769
BR-15	89.95	29.57	Ore-bearing adakitic porphyry		67.04	0.48	15.61	3.19	0.04	1.48	3.22	4.48	3.54	0.21	0.57	99.86	47.9429	8.02	0.914116	126	675	30	3.53	7.91	0.68	34.6	66.5	26.9	8.14	734	30.4	4.9	160	5.02	1.05	3.18	0.4	1.7	8.89	0.3	0.84	0.13	0.79	0.12	82.5647	43.7975	31.4159	1.44025	0.813207
BR-17	89.95	29.57	Ore-bearing adakitic porphyry	14.2	66.18	0.52	16.32	3.04	0.03	1.63	2.11	4.65	3.61	0.22	1.15	99.46	51.5588	8.26	1.05902	122	999	21.5	3.04	6.41	0.49	34.4	65.5	20.2	8.25	766	32.2	5.06	153	4.69	1.16	3.16	0.39	1.61	8.21	0.26	0.74	0.11	0.69	0.1	93.3009	49.8551	35.761	1.56168	0.886876
BR-18	89.95	29.57	Ore-bearing adakitic porphyry	14.8	66.23	0.51	16.09	3.36	0.03	1.55	2.26	5.86	3.29	0.21	0.63	100.02	47.8005	9.15	0.928605	126	777	14.9	2.86	5.86	0.44	25.6	50.4	12.5	6.3	676	24.3	3.91	127	3.68	1.05	2.8	0.33	1.35	6.65	0.23	0.62	0.09	0.59	0.09	101.654	43.3898	31.1235	1.53143	0.970165
DBQ-1	89.95	29.57	Ore-bearing adakitic porphyry		68.43	0.44	15.39	2.74	0.04	1.29	2.76	4.23	3.59	0.17	0.43	99.5	48.309	7.82	0.969039	136	667	28	5.59	7.98	0.57	31.8	62.5	33.8	7.3	716	26.7	4.63	171	4.7	0.97	2.95	0.34	1.49	7.86	0.26	0.72	0.11	0.74	0.11	91.0941	42.973	30.8245	1.34763	0.802405
QD-1	91.3833	29.55	Ore-bearing adakitic porphyry	17	62.87	0.45	16.24	2.79	0.04	2.14	5.7	3.74	3.61	0.2	1.67	99.44	60.3582	7.35	0.794043	47.7	704	7.49	2.05	4.18	0.31	20.2	39.9	8.5	5.27	807	20.3	3.45	102	3.01	0.91	2.57	0.31	1.57	8.33	0.29	0.75	0.11	0.69	0.11	96.8788	29.2754	20.9992	1.52288	0.934306
QDZK 001-116	91.3833	29.55	Ore-bearing adakitic porphyry	19.1	66.2	0.41	15.66	2.02	0.03	1.22	4.45	4.03	4.13	0.18	1.6	99.95	54.5227	8.16	0.81491	66.3	824	6.55	1.8	3.72	0.25	18.9	37.1	15.7	4.87	999	18.1	3.18	104	3.08	0.81	2.17	0.25	1.22	6.56	0.23	0.57	0.08	0.52	0.08	152.287	36.3462	26.0711	1.57026	0.942682
QDZK 001-216	91.3833	29.55	Ore-bearing adakitic porphyry	19	61.47	0.47	17.85	1.59	0.06	1.45	6.24	3.65	3.96	0.2	2.52	99.44	64.4163	7.61	0.823812	74.3	821	7.01	2.42	4.35	0.3	21.3	41.5	12.5	5.46	1106	19.8	3.37	109	3.25	0.76	2.48	0.28	1.35	7.01	0.24	0.61	0.09	0.54	0.08	157.775	39.4444	28.2935	1.67323	0.803705
TG-39	90.04	29.59	Ore-bearing adakitic porphyry	16	65.11	0.54	15.34	3.15	0.1	2.04	3.38	3.95	3.82	0.23	2.28	99.94	56.2471	7.77	0.913099	152	790	30.3	5.08	8.34	0.6	33.1	65.4	42.1	8.44	636	34	5.8	170	4.88	1.22	3.57	0.41	1.66	8.2	0.29	0.79	0.11	0.73	0.11	77.561	45.3425	32.5241	1.52195	0.819663
TZK 1101-32	90.04	29.59	Ore-bearing adakitic porphyry		63.77	0.49	14.56	3.19	0.08	1.72	2.99	3.92	4.74	0.33	3.7	99.49	51.6982	8.66	0.854535	259	1196	66.1	10.4	14.1	0.98	48.1	101	95.5	12.88	657	53.7	8.93	292	8.56	1.78	5.54	0.62	2.39	10.4	0.39	1.09	0.15	0.91	0.14	63.1731	52.8571	37.9144	1.75781	0.773683
TBL07-03	93.075	29.9083	Granite porphyry	19.72	69.2	0.33	19.05	1.65	0.011	0.45	1.57	3.81	2.85	0.056	1	99.977	35.1231	6.66	1.55889	68.8	676	4.96	1.23	6.09	0.49	24.9	45.9		5.33	569	19.3	2.87	75.9	2.44	0.55	1.97	0.22	1.07	5.19	0.18	0.47	0.07	0.47	0.08	109.634	52.9787	38.0016	1.52371	0.707151
TBL07-04	93.075	29.9083	Granite porphyry		69.56	0.36	15.48	1.55	0.023	0.83	0.88	2.3	7.87	0.036	1.5	100.389	51.5261	10.17	1.11155	72.4	976	6.14	1.84	5.29	0.4	21.4	46		5.75	522	21.3	3.2	94.3	3.03	0.81	2.11	0.24	1.3	6.47	0.24	0.62	0.09	0.61	0.1	80.6801	35.082	25.1643	1.42636	0.952999
TBL07-06	93.075	29.9083	Granite porphyry		69.88	0.36	15.69	1.68	0.05	0.68	2.68	3.95	3.76	0.055	1.17	99.955	44.5515	7.71	1.01489	200	635	5.12	1.24	5.46	0.43	17.5	32.2		3.67	592	12.9	1.84	77.4	2.54	0.33	1.31	0.17	0.84	4.46	0.16	0.4	0.07	0.44	0.08	132.735	39.7727	28.529	1.27774	0.64982
TBL07-09	93.075	29.9083	Granodiorite porphyry		68.89	0.38	16.48	1.71	0.04	0.76	2.48	3.86	3.82	0.059	0.96	99.439	46.8721	7.68	1.09775	72.6	802	6	1.54	5.6	0.4	24	44.3		5.02	559	17.8	2.5	84.9	2.7	0.67	1.64	0.18	0.85	3.96	0.15	0.37	0.06	0.39	0.07	141.162	61.5385	44.1415	1.45871	1.01159
TBL07-10	93.075	29.9083	Granodiorite porphyry		67.52	0.51	18.05	3.26	0.023	0.99	1.86	4	1.88	0.108	1.9	100.101	37.6102	5.88	1.5031	102	597	7.57	2.27	5.54	0.4	16.3	30.7		3.84	687	14.6	2.49	109	3.4	0.72	1.76	0.23	1.17	6.18	0.22	0.62	0.09	0.61	0.1	111.165	26.7213	19.1672	1.28372	1.05148
TBL07-20	93.075	29.9083	Granite porphyry		69.24	0.38	16.63	1.94	0.044	0.73	2.54	4.26	3.37	0.032	0.72	99.886	42.7576	7.63	1.08752	85	708	6.22	1.25	5.66	0.43	23.9	44.5		5.26	633	18.5	2.82	68.6	2.33	0.69	1.98	0.24	1.21	5.85	0.21	0.54	0.08	0.55	0.09	108.205	43.4545	31.1699	1.47244	0.892721
TBL07-21	93.075	29.9083	Granite porphyry		72.42	0.28	17.13	1.19	0.007	0.1	0.21	2.76	4.3	0.047	1.62	100.064	14.2964	7.06	1.7864	107	718	7.84	1.58	5.41	0.47	16.7	29.8		3.28	431	11.2	1.48	88.6	2.93	0.24	0.92	0.09	0.43	2.28	0.08	0.24	0.04	0.29	0.05	189.035	57.5862	41.3066	0.992398	0.628796
TBL07-24	93.075	29.9083	Granite porphyry		73.4	0.27	14.68	2.1	0.057	0.46	1.56	2.78	3.62	0.032	0.81	99.769	30.305	6.4	1.29418	220	885	7	1.12	5.73	0.45	23.9	43.4		5.19	551	18.3	2.77	107	3.27	0.61	1.94	0.24	1.38	7.39	0.26	0.7	0.1	0.71	0.11	74.5602	33.662	24.1457	1.30088	0.804475
TBL07-25	93.075	29.9083	Granite porphyry		68.72	0.37	16.91	2.24	0.035	0.79	3.19	4.18	2.68	0.052	0.89	100.057	41.1795	6.86	1.08431	64.5	551	4.39	0.71	5.03	0.34	20.6	38.4		4.44	578	15.9	2.49	115	3.29	0.71	1.93	0.24	1.32	7.28	0.26	0.71	0.1	0.67	0.11	79.3956	30.7463	22.0543	1.3186	0.990156
JR-2	88.9047	29.6625	Quartz monzonite	14.07	66.12	0.412	15.96	2.65	0.044	1.08	2.21	4.96	3.21	0.13	1.99	98.766	44.721	8.17	1.0186	106	727	7.69	2.44	3.9	0.35	16	31.7	20	3.69	767	13.9	2.5	96	2.7	0.667	1.83	0.22	1.1	5	0.19	0.54	0.075	0.47	0.073	153.4	34.0426	24.4187	1.56643	0.953353
JR-5	88.8878	29.6558	Monzonite porphyry	16.49	58.44	0.864	16.92	6.38	0.081	4.03	5.6	3.92	3.02	0.27	1.37	100.895	55.6322	6.94	0.84914	117	536	5.05	1.13	5.5	0.4	18.9	40.2	17	5.04	927	20	4.17	106	2.8	1	3.05	0.41	2.05	9	0.33	0.9	0.119	0.7	0.115	103	27	19.3671	1.96007	0.857246
07TBL-15	93.075	29.9083	Granodiorite porphyry	19.88	63.82	0.8	18.05	4.67	0.07	1.55	4	4.46	2.08	0.129	0.86	100.489	39.7174	6.54	1.0693	83.86	502.4	2.599	0.948	4.294	0.264	14.91	30.88	9.534	4	969.8	15.53	2.503	101.6	3.054	0.956	1.593	0.18	0.817	3.711	0.136	0.342	0.048	0.32	0.05	261.331	46.5938	33.4217	1.70878	1.46367
T339	90.0833	29.5833	Granitoid	14.6	69.25	0.45	15.21	2.64	0.02	1.4	2.13	3.8	4	0.18	0.61	99.69	51.2833	7.8	1.05102	201	889	27.2	5.34	7.52	0.71	28.6	62.4	24.3	7	726	26.2	4.44	84.1	2.85	1	2.62	0.31	1.45	8.29	0.27	0.68	0.11	0.65	0.11	87.5754	44	31.5612	1.49303	0.896358
T358	90.35	29.4833	Granitoid		66.09	0.41	15.37	2.55	0.08	1	2.79	4.11	3.59	0.17	3.38	99.54	43.7714	7.7	0.976559	145	855	21.6	4.62	6.25	0.53	28.4	60.6	43.2	6.58	673	24.6	3.88	103	3.1	0.96	2.32	0.27	1.28	6.69	0.21	0.59	0.098	0.5	0.084	100.598	56.8	40.7426	1.71339	0.978217
T379	90	29.6	Granitoid		67.63	0.38	15.53	3.12	0.05	1.37	3.04	4.03	3.67	0.19	0.52	99.53	46.5711	7.7	0.961641	153	845	31.9	6.19	7.83	0.67	32.9	68.9	33.5	7.58	766	27	4.37	90.8	2.77	1.08	2.82	0.34	1.55	8.42	0.28	0.77	0.1	0.59	0.1	90.9739	55.7627	39.9986	1.75831	0.94055
T380	90	29.6	Granitoid	14.3	68.44	0.33	15.9	2.59	0.05	1.11	2.72	4.18	3.86	0.15	0.27	99.6	45.9676	8.04	0.992536	158	1042	22.6	2.66	5.78	0.55	24.6	52.3	37	5.94	814	21	3.58	73.9	2.14	0.93	2.09	0.26	1.22	6.2	0.2	0.59	0.073	0.48	0.082	131.29	51.25	36.7616	1.70112	1.03942
T381	90	29.6	Granitoid	14	68.61	0.36	15.64	2.72	0.05	1.15	2.69	4.03	3.72	0.15	0.49	99.61	45.6307	7.75	1.00474	162	800	29.1	5.13	6.91	0.6	29.6	60.2	39.9	6.7	724	23.8	4	110	3.28	0.93	2.42	0.29	1.4	7.17	0.24	0.62	0.092	0.54	0.086	100.976	54.8148	39.3186	1.7352	0.913837
T399	88.3333	29.8333	Granitoid	14.3	67.95	0.42	15.44	2.39	0.03	1	2.45	4.61	4.21	0.14	0.96	99.6	45.3722	8.82	0.929281	204	825	21.9	4.31	7.92	0.67	35.9	70.5	31.9	7.56	713	26.3	4.48	94.9	2.84	0.97	2.65	0.34	1.63	7.99	0.24	0.78	0.087	0.76	0.1	89.2365	47.2368	33.883	1.43545	0.860664
T400	88.3333	29.8333	Granitoid		67.93	0.46	15.34	2.55	0.04	1.15	2.22	4.6	4.11	0.16	1.03	99.59	47.2358	8.71	0.954508	187	773	21.9	5.39	7.83	0.62	39.9	78.7	36.3	8.59	683	30	5.11	122	3.38	1.03	3.13	0.42	2.02	10.4	0.32	0.92	0.13	0.86	0.12	65.6731	46.3953	33.2794	1.57206	0.787369
T401	88.4167	29.8333	Granitoid		69.75	0.33	15.01	2.01	0.03	0.78	2.24	4.23	4.82	0.11	0.29	99.6	43.5131	9.05	0.9226	187	794	26.8	4.04	8.94	0.84	35.5	71	31	7.31	583	24.5	3.96	107	3.19	0.88	2.44	0.31	1.56	7.75	0.22	0.75	0.09	0.7	0.095	75.2258	50.7143	36.3773	1.49156	0.865493
T402	88.4167	29.8333	Granitoid		71.5	0.33	14.03	2.06	0.04	0.91	2.15	4.32	4	0.16	0.2	99.7	46.7205	8.32	0.913198	302	347	51.7	12.7	10.8	0.88	32	66.1	55.4	7.29	469	25.9	4.55	99.9	3.25	0.8	2.5	0.31	1.48	7.41	0.23	0.74	0.087	0.69	0.1	63.2928	46.3768	33.2661	1.43558	0.725167
T403	88.4167	29.8333	Granitoid		69.68	0.31	14.93	1.8	0.04	0.85	1.89	4.15	5.56	0.13	0.29	99.63	48.3842	9.71	0.915776	372	1146	44.9	12.7	10.2	0.82	34.2	67.7	58.3	7.38	628	25.7	4.55	88.3	2.79	1.01	2.63	0.31	1.41	7.12	0.23	0.69	0.087	0.66	0.092	88.2022	51.8182	37.1692	1.42985	0.892609
T404	88.4167	29.8333	Granitoid	14.4	72.09	0.33	13.8	1.82	0.03	0.75	1.9	4.34	4.21	0.13	0.27	99.67	44.9951	8.55	0.909749	270	672	29.5	5.13	8.54	0.66	45.4	90.2	52.9	8.81	582	29	4.8	116	3.33	0.88	2.67	0.32	1.37	7.08	0.23	0.68	0.083	0.57	0.085	82.2034	79.6491	57.1323	1.60865	0.751502
601-203	91.6142	29.6	X porphyry		76.675	0.171	11.552	0.776	0.048	0.526	0.684	1.227	8.269	0.073	1.1608	101.162	57.366	9.496	0.944006	149	610	14.1	1.69	5.12	0.5	16.8	35	34.7	3.92	284	14.3	2.29	59.7	2.16	0.41	1.37	0.15	0.75	3.71	0.13	0.36	0.05	0.36	0.05	76.5499	46.6667	33.474	1.39436	0.707668
601-312	91.6142	29.6	X porphyry	17.7	72.869	0.216	13.166	1.376	0.056	0.654	1.509	2.938	6.172	0.063	1.90065	100.92	48.5459	9.11	0.922034	127	836	18.3	3.17	7.01	0.75	20.6	41.7	42	4.6	474	16.7	2.7	64.3	2.32	0.55	1.68	0.2	1.14	6.45	0.21	0.61	0.08	0.57	0.08	73.4884	36.1404	25.9235	1.33858	0.789496
QL02-01	91.6142	29.6	Granodiorite	19.5	66.445	0.541	17.169	4.028	0.088	1.678	4.339	5.014	2.465	0.23	0.249934	102.247	45.2638	7.479	0.911944	48.1	719	5.205	1.285	3.285	0.365	18.3	38.95	26.75	4.745	960	19.35	3.515	54.8	1.83	0.9	2.39	0.275	1.45	6.815	0.26	0.695	0.09	0.6	0.085	140.866	30.5	21.8776	1.61745	0.949302
QL02-02	91.55	29.6	Granodiorite		67.601	0.505	16.69	3.875	0.081	1.516	3.766	4.665	2.786	0.209	0.365826	102.06	43.7129	7.451	0.950603	66.8	859	7.45	2.23	3.5	0.37	19.7	40.9	16.8	4.87	913	19.5	3.42	118	3.47	0.92	2.24	0.25	1.39	6.91	0.24	0.64	0.08	0.55	0.08	132.127	35.8182	25.6924	1.69148	1.01619
QL02-03	91.6	29.63	Granodiorite		68.295	0.479	16.416	3.71	0.083	1.463	3.805	4.729	2.872	0.199	0.189585	102.241	43.9081	7.601	0.920854	63.6	760	5.36	1.27	3.28	0.33	19.6	42.2	25.2	5.09	901	20.6	3.58	60.3	1.93	0.92	2.57	0.29	1.57	6.98	0.29	0.81	0.11	0.71	0.1	129.083	27.6056	19.8015	1.47998	0.927264
QL02-04-2	91.6	29.63	Granodiorite		66.811	0.514	17.013	3.936	0.107	1.622	4.184	4.908	2.66	0.219	0.244119	102.218	44.9954	7.568	0.915579	53.6	662	6.32	1.58	3.54	0.34	18.5	38.2	56	4.6	933	18.7	3.24	64.9	2.18	0.82	2.24	0.27	1.44	7.17	0.26	0.68	0.09	0.58	0.09	130.126	31.8966	22.8794	1.66169	0.930553
QL02-07	91.5	29.57	Granodiorite		66.102	0.548	16.746	4.277	0.11	1.749	4.142	4.797	2.671	0.225	0.239268	101.606	44.8049	7.468	0.913359	51.4	664	7.76	2.07	3.63	0.34	20.3	42.7	45.6	5.11	880	20.7	3.55	69.5	2.19	0.89	2.52	0.29	1.45	7.36	0.27	0.73	0.1	0.61	0.09	119.565	33.2787	23.8708	1.59094	0.909702
QL02-08	91.5	29.57	Granodiorite		67.096	0.493	16.445	3.593	0.076	1.456	3.793	4.669	2.849	0.204	0.347524	101.022	44.5802	7.518	0.930073	63.1	744	7.21	2.03	3.97	0.38	20.2	44.3	18	5.34	820	21.8	3.76	75.8	2.26	0.91	2.67	0.29	1.57	7.26	0.28	0.77	0.1	0.65	0.09	112.948	31.0769	22.2915	1.6166	0.878042
QL02-10	91.65	29.7	Granodiorite		66.772	0.515	16.801	3.795	0.089	1.581	4.126	4.838	2.686	0.222	0.244028	101.669	45.2648	7.524	0.913639	52	772	4.11	1.37	2.95	0.25	19.6	42.2	35.6	5.06	962	20.5	3.6	65.7	1.98	0.94	2.47	0.27	1.48	6.37	0.25	0.71	0.09	0.59	0.08	151.02	33.2203	23.8289	1.6789	0.963722
QL02-11	91.65	29.7	Granodiorite		65.7575	0.525	17.2465	3.956	0.0835	1.6565	4.368	5.085	2.379	0.2225	0.192504	101.472	45.3912	7.464	0.912363	41.1	788	6.99	1.79	3.19	0.29	18.3	38.4	23.4	4.92	969	19.4	3.44	55.9	1.94	0.85	2.36	0.25	1.37	6.93	0.24	0.67	0.09	0.61	0.1	139.827	30	21.519	1.50316	0.912026
QL02-13	91.66	29.66	Granodiorite		66.996	0.503	16.461	3.83	0.087	1.536	3.841	4.651	2.888	0.212	0.325791	101.331	44.3237	7.539	0.925735	63.6	789	6.49	1.64	3.52	0.31	19.7	42.1	20.6	5.06	877	20.4	3.55	78.8	2.39	0.93	2.54	0.28	1.45	6.69	0.26	0.69	0.09	0.59	0.09	131.091	33.3898	23.9505	1.64487	0.946838
QL02-15	91.66	29.66	Granodiorite		66.319	0.528	16.757	4.001	0.085	1.689	4.093	4.748	2.633	0.225	0.269289	101.347	45.5925	7.381	0.924605	46.95	753.5	5.165	1.18	3.255	0.285	19.05	40.75	28.05	4.945	950	20.1	3.525	66.55	2.12	0.9	2.42	0.275	1.49	6.98	0.26	0.695	0.09	0.61	0.09	136.103	31.2295	22.4009	1.63483	0.942061
QL02-16	91.55	29.6	Granodiorite		67.648	0.479	16.584	3.53	0.077	1.409	3.761	4.732	2.823	0.199	0.233532	101.476	44.2069	7.555	0.937026	60.3	770	4.92	1.27	3.83	0.39	20.1	44.1	19.3	5.41	914	21.4	3.78	68.5	2.2	0.89	2.5	0.3	1.55	7.99	0.28	0.77	0.1	0.64	0.1	114.393	31.4062	22.5277	1.62094	0.885111
QL02-22	91.6	29.63	Granodiorite		66.284	0.54	16.8025	4.0135	0.094	1.677	3.473	4.629	2.6815	0.226	0.61166	101.032	45.3384	7.3105	0.997123	74.2	756	8.43	2.42	4.08	0.38	23.1	47.8	137	5.59	968	22.6	3.79	74.4	2.55	0.95	2.59	0.29	1.61	7.41	0.29	0.78	0.1	0.66	0.09	130.634	35	25.1055	1.63267	0.926996
QL02-26	91.45	29.5	Granodiorite		66.553	0.53	17.025	3.976	0.081	1.61	4.191	4.824	2.6	0.226	0.286922	101.903	44.5618	7.424	0.925717	53.7	797	6.44	1.83	4.18	0.39	20.3	43.3	23.9	5.22	964	21.3	3.69	69.8	2.2	0.94	2.57	0.3	1.54	7.95	0.28	0.7	0.09	0.65	0.09	121.258	31.2308	22.4018	1.58571	0.933194
QL02-27	91.45	29.5	Granodiorite		67.139	0.516	16.741	3.865	0.096	1.624	3.975	4.673	2.867	0.219	0.304199	102.019	45.4769	7.54	0.928044	58.85	748.5	5.545	1.34	3.39	0.27	19.1	40.8	19.55	4.985	920	20.2	3.58	57.7	1.84	0.955	2.545	0.285	1.545	7.065	0.27	0.74	0.095	0.605	0.085	130.219	31.5702	22.6453	1.70918	0.967256
QL02-28	91.6142	29.6	Granodiorite		66.946	0.511	16.375	3.855	0.097	1.585	3.804	4.569	2.967	0.213	0.230218	101.152	44.939	7.536	0.926976	72.3	777	11.2	2.46	3.89	0.32	22.6	47.85	27.3	5.56	892	21.85	3.61	86.8	2.63	0.9	2.465	0.285	1.47	7.05	0.265	0.69	0.085	0.59	0.085	126.525	38.3051	27.4762	1.66756	0.922368
QL04-4	91.6142	29.6	Granodiorite		67.3405	0.5045	16.728	3.773	0.059	1.456	3.5625	4.8185	2.726	0.21	0.29669	101.475	43.376	7.5445	0.962815	72.8	735	10.4	2.38	3.88	0.39	23.7	51.8	13.8	6.19	953	24.4	4.14	89	2.77	0.99	2.68	0.3	1.59	7.73	0.29	0.8	0.1	0.68	0.09	123.286	34.8529	25	1.56496	0.908639
QL33-3	91.6142	29.6	Granodiorite		68.912	0.446	16.509	2.637	0.046	1.436	2.309	4.641	4.015	0.181	0.288929	101.421	51.9457	8.656	1.01923	86.7	813	7.1	1.49	3.63	0.34	19.3	39.5	16	4.67	840	18.9	3.38	72.4	2.29	0.84	2.21	0.26	1.32	5.89	0.24	0.64	0.09	0.58	0.09	142.615	33.2759	23.8688	1.52321	0.939612
SR0704-355	92.6	30.1811	Dacite porphyry		72.09	0.84	11.77	1.93	0.22	1.06	2.45	0.05	2.77	0.76	5.36	99.83	52.1586	2.82	1.55884	135	2264	67.1	13.8	24	1.7	68.8	140	41.3	18.1	187	67.2	11.2	386	10.84	2.15	7.86	0.89	3.85	16.6	0.63	1.53	0.2	1.25	0.19	11.2651	55.04	39.4802	2.06142	0.700554
SR0905-478	92.7	30.1808	Granodiorite porphyry		68.96	0.32	13.69	0.49	0.04	0.56	1.51	5.09	5.64	0.14	2.66	100.21	69.4062	10.73	0.793889	381	689	31.2	10.4	11.5	1.17	37.3	65.6	29.5	6.96	175	23.5	3.32	141	4.44	0.77	2.56	0.28	1.35	7.56	0.25	0.66	0.1	0.68	0.11	23.1481	54.8529	39.346	1.32874	0.807468
BB-76	94.4	29.57	Adakite		64.58	0.64	18	3.65	0.05	1.12	3.76	5.16	2.05	0.26	0.51		7.21	40.3	1.02494	74.8	428	6.29	0.86	4.1	0.47	39.4	74.2		8.71	847	31.4	4.54	98.3	2.59	1.02	2.7	0.25	1.24	8.18	0.23	0.85	0.12	0.68	0.08	103.545	57.9412	41.5612	1.22047	0.890664
BB-77	94.4	29.57	Adakite		64.53	0.59	18.05	3.46	0.03	1.04	3.94	5.04	2.01	0.27	0.48		7.05	39.8	1.02271	69.8	401	7.01	0.95	6.73	0.34	38.3	74.3		8.6	863	31.5	5.08	107	2.72	1.14	4.06	0.58	3.29	14.8	0.51	1.08	0.1	0.46	0.06	58.3108	83.2609	59.723	4.78689	0.767421
BB-78	94.4	29.57	Adakite		67.17	0.46	17.23	2.78	0.02	0.9	3.68	4.76	1.86	0.23	0.53		6.62	41.6	1.04095	58.9	348	6.44	1.01	5.41	0.35	33.4	65.3		7.55	728	27.6	4.69	100	2.74	1.01	3.97	0.53	2.53	9.95	0.39	0.81	0.08	0.45	0.06	73.1658	74.2222	53.2396	3.7629	0.715588
BB-82	94.4	29.57	Adakite		69.68	0.48	16.06	2.81	0.04	0.92	3.28	4.59	1.53	0.09	0.37		6.12	41.9	1.05757	55.7	403	6.48	0.59	2.95	0.37	32.2	57.9		6.22	764	20.9	2.75	85	2.31	1	1.79	0.17	0.73	3.65	0.12	0.37	0.05	0.27	0.05	209.315	119.259	85.5446	1.80957	1.37794
BB-84	94.4	29.57	Adakite		69.87	0.46	16.12	2.64	0.03	0.85	3.36	4.67	1.42	0.11	0.35		6.09	41.5	1.05059	51.3	356	7.17	0.79	2.82	0.37	37.8	67.2		7.24	795	24.2	3.17	103	2.66	1.02	1.99	0.2	0.86	4.67	0.15	0.46	0.05	0.31	0.05	170.236	121.935	87.4643	1.85674	1.24156
BB-86	94.4	29.57	Adakite	27.1	66.18	0.58	17.46	3.36	0.06	0.91	3.28	4.75	2.42	0.25	0.61		7.17	37.3	1.06368	81.4	413	7.91	1.52	6.97	0.83	40.8	77.6		9.39	683	34.9	5.72	119	3.17	1.1	4.27	0.53	2.71	14.4	0.5	1.38	0.18	1.25	0.18	47.4306	32.64	23.4127	1.45102	0.680463
BB-87	94.4	29.57	Adakite		70.07	0.43	15.86	2.56	0.04	0.62	2.69	3.88	2.69	0.14	0.44		6.57	34.8	1.11676	73.3	568	8.36	1.42	4.89	0.68	31.3	63.1		6.91	580	25.2	4.02	138	4.05	1.03	2.95	0.37	2.02	10.7	0.37	1.15	0.17	1.21	0.18	54.2056	25.8678	18.5549	1.11733	0.914401
BB-88	94.4	29.57	Adakite		72.53	0.44	13.88	2.84	0.04	0.86	2.21	3.58	2.7	0.15	0.52		6.28	40	1.08059	84.5	610	8.08	1.43	6.15	0.69	28.9	61.1		6.41	537	23.5	3.76	207	5.79	0.8	2.81	0.33	1.69	8.66	0.31	0.88	0.12	0.86	0.14	62.0092	33.6047	24.1046	1.31524	0.752431
BB-91	94.4	29.57	Adakite		70.47	0.34	15.42	2.08	0.02	0.57	2.07	3.26	4.46	0.15	0.51		7.72	37.6	1.10354	93.6	1870	5.35	0.61	5.09	0.33	21.4	42.6		4.73	652	17.2	2.84	86.7	2.43	0.95	2.35	0.31	1.87	10.3	0.36	1.05	0.13	0.79	0.11	63.301	27.0886	19.4306	1.58427	1.12423
BB-93	94.4	29.57	Adakite		67.88	0.5	16.35	2.94	0.04	0.94	2.86	4.37	3.26	0.22	0.56		7.63	41.3	1.02597	87.2	1009	7.97	0.74	6.25	0.41	32.3	64.6		6.99	734	25.1	3.8	116	3.18	1.03	3.03	0.41	2.34	13.5	0.46	1.35	0.18	1.09	0.15	54.3704	29.633	21.2558	1.43683	0.928
BB-95	94.4	29.57	Adakite		70.35	0.47	15.79	2.87	0.03	0.79	3.14	3.96	2.05	0.29	0.55		6.01	37.7	1.09208	66.5	478	9.56	0.98	7.1	0.47	36.4	74.8		8.35	602	30.8	5.37	95	2.66	1.12	4.35	0.62	3.69	19.7	0.7	1.92	0.25	1.47	0.19	30.5584	24.7619	17.7617	1.68006	0.708451
12ZN-01	87.4667	29.6583	Monzonitic granite porphyry		70.16	0.32	15.46	2.11	0.02	0.77	1.58	4.62	3.72	0.1	0.65	99.42	42.009	8.34	1.0651	192.9	632.8	9.94	3.46	4.63	0.46	19.72	38.71	25.67	4.36	497.2	16.12	2.63	119	3.5	0.62	1.81	0.23	1.11	5.46	0.21	0.54	0.08	0.49	0.07	91.0623	40.2449	28.8676	1.51615	0.868757
12ZN-02	87.4667	29.6583	Monzonitic granite porphyry	12.4	65.37	0.64	16.45	3.84	0.03	1.59	2.64	4.32	3.51	0.21	0.9	99.3	45.1134	7.83	1.04615	195.6	749.8	15.62	4.41	7.02	0.43	33.16	67.2	20.38	7.81	787.9	29.7	4.82	146.7	3.24	0.63	1.86	0.28	1.43	9.7	0.28	0.77	0.12	0.73	0.12	81.2268	45.4247	32.5831	1.31108	0.643257
12ZN-04	87.4667	29.6583	Granite porphyry		74.98	0.21	13.39	1.13	0.01	0.27	0.14	3.51	4.58	0.1	1.21	99.43	32.1715	8.09	1.21735	494.9	216.4	52.27	28.06	11.54	1.1	24.88	46.57	49.05	4.74	108.4	15.55	2.26	123.5	4.49	0.36	1.46	0.18	0.88	5.24	0.17	0.49	0.08	0.59	0.1	20.687	42.1695	30.2482	0.998265	0.605892
12ZN-05	87.4667	29.6583	Granite porphyry		73.75	0.21	12.63	1.5	0.04	0.45	1.08	3.22	4.47	0.1	2.11	99.47	37.3244	7.69	1.04251	487.7	189.8	49.11	44.15	11.4	1.07	26.84	51.84	80.02	5.61	118.3	19.05	2.85	125	4.47	0.46	1.77	0.21	0.95	5.75	0.19	0.51	0.08	0.62	0.1	20.5739	43.2903	31.0521	1.02553	0.626141
12ZN-06	87.4667	29.6583	Granite porphyry	12.3	73.59	0.21	12.57	1.57	0.04	0.46	1.18	2.88	4.65	0.09	2.2	99.37	36.7733	7.53	1.05337	480.6	187.5	50.08	27.47	10.98	1.08	29.82	57.66	91.89	5.91	109	19.93	2.86	120.1	4.43	0.46	1.78	0.2	0.96	5.39	0.18	0.51	0.08	0.59	0.1	20.2226	50.5424	36.254	1.08902	0.623288
12ZN-07	87.4667	29.6583	Monzonitic granite porphyry		70.32	0.3	15.19	2.13	0.02	0.84	1.5	4.72	3.74	0.11	0.66	99.41	43.9097	8.46	1.04358	184	634.3	15.62	4.41	4.16	0.43	17.2	32.19	20.38	3.83	569.2	13.47	2.46	106.4	3.24	0.63	1.86	0.28	1.43	7.01	0.28	0.77	0.12	0.73	0.12	81.1983	23.5616	16.9008	1.31108	0.90041
12ZN-09	87.4667	29.6583	Monzonitic granite porphyry		69.68	0.38	15.19	2.39	0.03	0.95	2.16	4.37	3.76	0.12	0.48	99.39	44.1041	8.13	0.999103	213	623.1	20.24	4.85	5.88	0.6	28.65	53.85	21.21	5.97	615.5	21.16	3.37	112.3	3.33	0.73	2.39	0.3	1.48	7.68	0.28	0.75	0.11	0.72	0.1	80.1432	39.7917	28.5425	1.37577	0.78638
12ZN-11	87.4667	29.6583	Diorite porphyry		61.14	0.18	16.47	6.14	0.11	3	6.21	3.83	1.22	0.22	0.52	99.3	49.236	5.05	0.869778	28.85	329.1	0.76	0.27	2.92	0.17	7.66	18.83	5.1	2.64	681.4	11.86	2.64	113.5	2.86	0.86	2.43	0.35	2.03	10.45	0.41	1.13	0.16	1.01	0.15	65.2057	7.58416	5.44011	1.34521	1.03805
12ZN-12	87.4667	29.6583	Diorite porphyry	12.5	58.61	0.52	16.91	7.1	0.13	3.44	6.79	3.75	1.24	0.22	0.58	99.27	49.0258	4.99	0.850502	21.18	334.6	0.3	0.48	3.04	0.2	6.36	17.34	5.33	2.85	735.5	13.35	3.17	95.99	2.77	1.04	3.09	0.46	2.57	12.12	0.52	1.38	0.2	1.25	0.2	60.6848	5.088	3.64962	1.37606	1.01589
[truncated: 1 more columns]

## Sheet: Table S2
Table S2. Sr-Nd isotope data of the the subduction and collision-related magmatic rocks in the Gangdese belt, southern Tibet
sample no	longitude (°E)	latitude (°N)	rock type	age (Ma)	87Rb/86Sr	87Sr/86Sr	(87Sr/86Sr)i	(87Sr/86Sr)(t=15 Ma)	147Sm/144Nd	143Nd/144Nd	εNdi	εNd(t=15 Ma)	TDM(Ma)	T2DM(Ma)	references
Jurassic
1513-58	91.35	29.36	Granitic porphyry	182.3	0.6456	0.706497	0.704824	0.704962	0.0946	0.512571	-1.30697	-1.11162			Hou et al., 2015
3911-90	91.35	29.36	Granitic porphyry	182.3	2.67	0.70985	0.702919	0.703488	0.0971	0.512519	-2.32133	-2.1308			Hou et al., 2015
3911-93	91.35	29.36	Granitic porphyry	182.3	2.416	0.709278	0.703016	0.703531	0.0995	0.512519	-2.32133	-2.13539			Hou et al., 2015
601-89	91.35	29.36	Granitic porphyry	182.3	1.809	0.708493	0.703804	0.704189	0.1022	0.512535	-2.00922	-1.82844			Hou et al., 2015
10SR-08	92	29.2	Dacite		0.2035	0.706039	0.705489	0.705532	0.1168	0.512702	1.24844	1.4014	708		Kang et al., 2014
10SR-13	92	29.2	Andesite	195	0.227	0.705403	0.704789	0.704837	0.1358	0.512791	2.98456	3.10122	706		Kang et al., 2014
10SR-23	92	29.2	Volcanic tuff		0.2078	0.705515	0.704954	0.704998	0.1291	0.51286	4.33054	4.46008	526		Kang et al., 2014
10SR-27	92	29.2	Basalt		0.024	0.704191	0.704126	0.704131	0.1768	0.512967	6.41778	6.45611	762		Kang et al., 2014
10SR-28	92	29.2	Basalt		0.0174	0.705074	0.705027	0.705031	0.1356	0.512836	3.86237	3.97945	616		Kang et al., 2014
10SR-32	92	29.2	Basalt		0.0037	0.70411	0.7041	0.704101	0.1704	0.512965	6.37877	6.42934	656		Kang et al., 2014
10SR-33	92	29.2	Basalt	189	0.0264	0.704609	0.704538	0.704544	0.1469	0.512811	3.3747	3.47014	778		Kang et al., 2014
10SR-39	92	29.2	Basalt		0.0131	0.70402	0.703984	0.703987	0.1586	0.512945	5.98863	6.06177	572		Kang et al., 2014
10SR-41	92	29.2	Basalt		0.0634	0.70415	0.703979	0.703993	0.1665	0.512876	4.64265	4.70062	890		Kang et al., 2014
10SR-43	92	29.2	Basalt		0.0296	0.704164	0.704084	0.70409	0.153	0.512876	4.64265	4.72646	544		Kang et al., 2014
10SR-48	92	29.2	Andesite		0.6383	0.704906	0.703182	0.703318	0.1078	0.512876	4.64265	4.81296	597		Kang et al., 2014
X1	88.4	29.36	Diabase	165.3	0.2829	0.70518	0.70452	0.70458	0.1315	0.512878	4.68167	4.80662	507	459	Lang et al., 2017
X10	88.4	29.37	Diabase	165.3	0.5755	0.70521	0.70386	0.703983	0.134	0.512896	5.03279	5.15298	489	435	Lang et al., 2017
X11	88.4	29.39	Diabase	165.3	0.1212	0.70529	0.70501	0.705036	0.1469	0.512884	4.79871	4.8942	610	476	Lang et al., 2017
X3	88.4	29.36	Diabase	165.3	0.6563	0.70575	0.70421	0.70435	0.1214	0.512865	4.42808	4.57235	473	462	Lang et al., 2017
X4	88.4	29.36	Diabase	165.3	0.1821	0.70511	0.70468	0.704719	0.1529	0.512897	5.0523	5.13631	638	466	Lang et al., 2017
X5	88.4	29.37	Diabase	165.3	0.2179	0.70496	0.70445	0.704496	0.1322	0.512923	5.55948	5.68313	428	389	Lang et al., 2017
X7	88.4	29.37	Diabase	165.3	0.1397	0.70474	0.70441	0.70444	0.1298	0.512896	5.03279	5.16101	465	428	Lang et al., 2017
X8	88.4	29.37	Diabase	165.3	0.2486	0.70452	0.70394	0.703993	0.131	0.512895	5.01328	5.13921	473	431	Lang et al., 2017
14JC01	92.7	29.4888	Rhyolite	171	0.95	0.706599	0.704276	0.704478	0.1357	0.512652	0.273097	0.389849	975	827	Liu et al., 2018
14JC02	92.7	29.4808	Rhyolite	172	1.3865	0.707884	0.704493	0.704788	0.1361	0.51266	0.429153	0.545145	964	814	Liu et al., 2018
14YB05	91.3	29.739	Dacite	182	2.5881	0.708389	0.701839	0.70239	0.1471	0.512745	2.08724	2.18225	929	701	Liu et al., 2018
14YB06	91.3	29.7294	Rhyolite	176	5.0648	0.713	0.700182	0.701261	0.1171	0.512701	1.22894	1.38132	711	716	Liu et al., 2018
14YB08	91.3	29.7282	Andesite	178	2.1704	0.708943	0.703451	0.703913	0.1656	0.51279	2.96506	3.02469	1143	664	Liu et al., 2018
14YB09	91.3	29.7219	Andesite	177	0.0652	0.704858	0.704693	0.704707	0.1504	0.512735	1.89217	1.98085	1001	723	Liu et al., 2018
14YB10	91.3	29.7294	Basalt	168	0.0037	0.704539	0.70453	0.704531	0.1496	0.512757	2.32133	2.41155	937	685	Liu et al., 2018
14YB12	91.3	29.7178	Andesite	178	0.2909	0.70537	0.704634	0.704696	0.1453	0.512716	1.52154	1.61997	970	744	Liu et al., 2018
14YB13	91.3	29.7164	Rhyolite	172	0.633	0.706154	0.704606	0.704741	0.1631	0.51281	3.35519	3.41962	1027	625	Liu et al., 2018
14YB15	91.3	29.7162	Andesite	174	0.0098	0.704562	0.704538	0.70454	0.1469	0.512727	1.73612	1.83149	966	727	Liu et al., 2018
14YB26	91.7	29.7266	Rhyolite	172	1.3178	0.706636	0.703413	0.703694	0.1127	0.512722	1.63858	1.7994	648	674	Liu et al., 2018
14YB27	91.7	29.7357	Rhyolite	173	1.0106	0.706457	0.703985	0.7042	0.1122	0.512724	1.6776	1.83938	643	671	Liu et al., 2018
14YB29	91.45	29.7514	Basalt	174	0.0064	0.704312	0.704296	0.704297	0.1522	0.512776	2.69196	2.77722	929	659	Liu et al., 2018
XC5002	88.4	29.3528	Granodiorite-porphyry	175	0.228	0.705352	0.704785	0.704834	0.117	0.512851	4.15498	4.30766	230		Qu et al，2007 (in Chinese)
XC5-01	88.4	29.3528	Granodiorite-porphyry	179	0.336	0.705154	0.704299	0.704371	0.118	0.512831	3.76484	3.9156	420		Qu et al，2007 (in Chinese)
XC5012	88.4	29.3528	Granodiorite-porphyry	175	0.421	0.705809	0.704762	0.704852	0.114	0.51285	4.13547	4.2939	370		Qu et al，2007 (in Chinese)
XX-09	88.4	29.3528	Dacite porphyry	195	1.56	0.708267	0.703941	0.704273	0.105	0.512826	3.66731	3.84294	230		Qu et al，2007 (in Chinese)
XX-29	88.4	29.3528	Dacite porphyry	195	0.079	0.705396	0.705177	0.705194	0.117	0.51273	1.79464	1.94724	560		Qu et al，2007 (in Chinese)
XX-30	88.4	29.3528	Dacite porphyry	195	0.0896	0.705605	0.705357	0.705376	0.12	0.512931	5.71553	5.86254	280		Qu et al，2007 (in Chinese)
Q810-10	90.6	29.4167	Andesite	189	0.065433	0.703947	0.703771	0.703785	0.144015	0.512884	4.79871	4.89972	580		Wang C et al., 2018
Q810-11	90.6	29.4167	Andesite	189	0.046699	0.703924	0.703799	0.703809	0.140223	0.512817	3.49174	3.59996	590		Wang C et al., 2018
Q810-12	90.6	29.4167	Andesite	189	0.050341	0.703886	0.703751	0.703762	0.13329	0.51291	5.30589	5.42744	460		Wang C et al., 2018
Q810-14	90.6	29.4167	Andesite	189	0.332273	0.704448	0.703555	0.703626	0.133786	0.512882	4.75969	4.88028	510		Wang C et al., 2018
Q810-15	90.6	29.4167	Andesite	189	0.025571	0.703705	0.703636	0.703641	0.152186	0.512908	5.26687	5.35226	600		Wang C et al., 2018
Q810-16	90.6	29.4167	Andesite	189	0.187203	0.704027	0.703524	0.703564	0.143655	0.512924	5.57899	5.68071	490		Wang C et al., 2018
Q810-18	90.6	29.4167	Andesite	189	0.018915	0.703676	0.703625	0.703629	0.150948	0.512935	5.79356	5.88134	530		Wang C et al., 2018
TB-10-1	88.8	29.38	Diorite	178	0.255	0.704131	0.7035	0.703554	0.14	0.512899	5.09131	5.20002	520	443	Wang R Q et al., 2017
TB-1-6	88.8	29.38	Diorite	178	0.201	0.70398	0.7035	0.703543	0.1311	0.51291	5.30589	5.43163	444	409	Wang R Q et al., 2017
TB-3	88.8	29.47	Gabbro	178	0.015	0.703643	0.7036	0.703603	0.185	0.512895	5.01328	5.03586	1351	533	Wang R Q et al., 2017
TB-8	88.8	29.47	Gabbro	178	0.007	0.703632	0.7036	0.703601	0.17	0.512922	5.53997	5.59128	796	462	Wang R Q et al., 2017
YB1302	91.3	29.6517	Basalt			0.704204	0.704174	0.704175		0.512755	2.28231	2.65884	860		Wei et al., 2014
YB1303	91.3	29.6517	Basalt			0.704224	0.704183	0.704184		0.512758	2.34083	2.71736	910		Wei et al., 2014
YB1304	91.3	29.6517	Basalt			0.704714	0.703883	0.703906		0.512767	2.5164	2.89293	720		Wei et al., 2014
YB1306	91.3	29.6517	Basalt			0.704377	0.703963	0.703975		0.51276	2.37985	2.75638	930		Wei et al., 2014
YB1307	91.3	29.6533	Basalt			0.704346	0.704298	0.704299		0.512723	1.65809	2.0346	1080		Wei et al., 2014
YB1309	91.4	29.7733	Dacite			0.705167	0.704093	0.704124		0.512742	2.02872	2.40524	780		Wei et al., 2014
YB1310	91.45	29.77	Dacite	178.3		0.706355	0.704252	0.704313		0.512696	1.1314	1.50789	990		Wei et al., 2014
YB1311	91.45	29.7683	Basalt			0.704604	0.704416	0.704421		0.51276	2.37985	2.75638	1010		Wei et al., 2014
YB1315	91.45	29.735	Dacite			0.705489	0.704776	0.704797		0.512662	0.468167	0.844628	1030		Wei et al., 2014
YB1316	91.45	29.7233	Dacite			0.707101	0.704425	0.704502		0.51263	-0.156056	0.220382	890		Wei et al., 2014
YB1318	91.45	29.7217	Rhyolite	177.9		0.706403	0.7053	0.705332		0.512634	-0.0780278	0.298413	870		Wei et al., 2014
YB1319	91.45	29.72	Andesite			0.705788	0.705043	0.705064		0.512678	0.780278	1.15675	1320		Wei et al., 2014
YB1320	91.45	29.7083	Dacite	176.4		0.710763	0.703844	0.704045		0.512624	-0.273097	0.103336	1040		Wei et al., 2014
YB1321	91.3	29.695	Basalt			0.705152	0.704994	0.704998		0.51274	1.98971	2.36623	1020		Wei et al., 2014
YB1322	91.3	29.7217	Basalt			0.704592	0.704579	0.704579		0.512751	2.20428	2.58081	890		Wei et al., 2014
YB1323	91.3	29.7367	Andesite	178		0.70578	0.704703	0.704733		0.512682	0.858305	1.23478	1250		Wei et al., 2014
YB1324	91.3	29.7383	Dacite	174.6		0.708326	0.70272	0.702882		0.512741	2.00922	2.38573	1030		Wei et al., 2014
YB1326	91.45	29.735	Dacite	183.3		0.7101	0.703337	0.703533		0.512635	-0.0585208	0.317921	930		Wei et al., 2014
YB1327	91.45	29.735	Rhyolite			0.706519	0.704825	0.704874		0.512629	-0.175562	0.200875	890		Wei et al., 2014
BD01	91.3	29.6167	Basalt	174.2	0.0038	0.704339	0.70433	0.704331	0.1406	0.512699	1.18992	1.29733			Zhu et al., 2008
BD04	91.3	29.6167	Basalt	174.2	0.0244	0.704881	0.70482	0.704825	0.1411	0.512723	1.65809	1.76456			Zhu et al., 2008
BD13	91.3	29.6167	Basalt	174.2	0.0377	0.704618	0.70452	0.704528	0.1472	0.512789	2.94555	3.04039			Zhu et al., 2008
BD16	91.3	29.6167	Basalt	174.2	0.008	0.704334	0.70431	0.704312	0.1434	0.512708	1.36549	1.46754			Zhu et al., 2008
BD19	91.3	29.6167	Basalt	174.2	0.0059	0.704843	0.70483	0.704831	0.1388	0.512687	0.95584	1.06668			Zhu et al., 2008
BD21	91.3	29.6167	Basalt	174.2	0.0404	0.704455	0.70435	0.704359	0.1471	0.512718	1.56056	1.65554			Zhu et al., 2008
DZ01-2	91.4	29.6667	Dacite	174.2	0.1732	0.704811	0.70438	0.704417	0.1303	0.512693	1.07288	1.2	838	753	Zhu et al., 2008
DZ03-1	91.4	29.6667	Dacite	174.2	2.4112	0.709351	0.70338	0.703894	0.1156	0.51272	1.59957	1.75484	672	684	Zhu et al., 2008
DZ03-2	91.4	29.6667	Dacite	174.2	0.4621	0.705466	0.70432	0.704418	0.128	0.512643	0.0975347	0.229016	906	829	Zhu et al., 2008
DZ05-1	91.4	29.6667	Dacite	174.2	0.7963	0.706303	0.70433	0.7045	0.1209	0.512627	-0.214576	-0.0695187	862	842	Zhu et al., 2008
DZ07-2	91.4	29.6667	Basalt	174.2	0.3657	0.705956	0.70497	0.705048	0.1551	0.512767	2.5164	2.5961			Zhu et al., 2008
DZ07-4	91.4	29.6667	Dacite	174.2	1.8614	0.708627	0.70402	0.704417	0.1205	0.512566	-1.4045	-1.25872	958	938	Zhu et al., 2008
DZ09-1	91.4	29.6667	Basalt	174.2	0.0722	0.705249	0.70505	0.705065	0.1412	0.512719	1.58006	1.68634			Zhu et al., 2008
DZ11-1	91.4	29.6667	Basalt	174.2	0.3406	0.707272	0.70635	0.706423	0.1416	0.512707	1.34598	1.45148			Zhu et al., 2008
DZ13-1	91.4	29.6667	Basalt	174.2	0.0044	0.70455	0.70454	0.704541	0.1516	0.512748	2.14576	2.23216			Zhu et al., 2008
YB5-1	91.45	29.7917	Basalt	174.2	0.1285	0.704958	0.70461	0.704637	0.1406	0.5128	3.16012	3.26761			Zhu et al., 2008
YB5-2	91.45	29.7917	Basalt	174.2	0.0121	0.704553	0.70452	0.704523	0.1491	0.512767	2.5164	2.60759			Zhu et al., 2008
YB5-3	91.45	29.7917	Basalt	174.2	0.0056	0.704289	0.70427	0.704271	0.1457	0.512773	2.63344	2.73114			Zhu et al., 2008
Cretaceous
08ND-4	91.7967	29.3014	Diorite	96	0.3678	0.704553	0.70405	0.704128	0.1073	0.512762	2.41886	2.59005	608		Chen et al., 2015
09NDS-17	91.7967	29.3067	Diorite porphyrite	91	0.544	0.705164	0.70447	0.704586	0.1033	0.512742	2.02872	2.20755	637		Chen et al., 2015
09NDZ-19	91.7967	29.3031	Felsophyre	94	0.8424	0.707072	0.70596	0.706139	0.0902	0.512751	2.20428	2.40819	610		Chen et al., 2015
07TB33a-1	91.4	29.35	Monzonite	91.3	0.369	0.704298	0.7038	0.703879	0.105	0.512753	2.2433	2.41888	557	622	Jiang et al., 2012
07TB33a-2	91.4	29.35	Monzonite		0.128	0.704147	0.704	0.704027	0.111	0.51274	1.98971	2.1538	612	649	Jiang et al., 2012
07TB33b-2	91.4	29.35	Monzonite	93.3	0.343	0.704272	0.7038	0.703873	0.104	0.512768	2.5359	2.71341	534	598	Jiang et al., 2012
07TB33d	91.4	29.35	Diorite	90.3	0.0785	0.704224	0.7041	0.704117	0.122	0.512816	3.47224	3.61533	559	539	Jiang et al., 2012
07TB33e	91.4	29.35	Diorite		0.313	0.704273	0.7039	0.703967	0.104	0.512778	2.73097	2.90848	519	581	Jiang et al., 2012
07TB16	91.8	29.2578	Diorite		0.1361	0.704712	0.704564	0.704593	0.1253	0.512758	2.34083	2.47757	680		Jiang et al., 2014
07TB18	91.8	29.2567	Diorite	76.5	0.2589	0.704796	0.704515	0.70457	0.125	0.512758	2.34083	2.47814	680		Jiang et al., 2014
07TB20a	91.8	29.2581	Diorite		0.272	0.704873	0.704577	0.704635	0.1279	0.512717	1.54105	1.67278	770		Jiang et al., 2014
09TB117-1	91.4	29.3019	Diorite	91.1	0.1508	0.704158	0.703963	0.703995	0.1201	0.512778	2.73097	2.87767	610		Jiang et al., 2014
09TB122	91.4	29.1444	Granodiorite		0.7301	0.704749	0.703797	0.703953	0.1005	0.512782	2.809	2.99321	500		Jiang et al., 2014
09TB124	91.5	29.3025	Granite	91.8	2.9907	0.707853	0.703952	0.704589	0.0867	0.512761	2.39935	2.60996	470		Jiang et al., 2014
09TB125	91.5	29.3039	Diorite		0.1824	0.703952	0.703714	0.703753	0.1115	0.512782	2.809	2.97216	550		Jiang et al., 2014
09TB67-1	92.1	29.31	Ggabbro		0.18	0.705024	0.704784	0.704822	0.1366	0.51259	-0.936333	-0.821349	1110		Ma et al., 2013a
09TB68	92.2	29.31	Ggabbro		0.0789	0.704393	0.704288	0.704305	0.1483	0.51272	1.59957	1.69226	1005		Ma et al., 2013a
09TB69	92.1	29.23	Ggabbro		0.1009	0.70469	0.704555	0.704576	0.1252	0.512698	1.17042	1.3073	781		Ma et al., 2013a
09TB71	92.1	29.24	Ggabbro	91.4	0.1968	0.70504	0.704777	0.704819	0.1721	0.512665	0.526687	0.573787	1781		Ma et al., 2013a
09TB72-1	92.2	29.3	Ggabbro		0.095	0.704934	0.704807	0.704827	0.1609	0.512706	1.32647	1.39504	1286		Ma et al., 2013a
09TB73	92.2	29.2736	Ggabbro		0.0925	0.704467	0.704343	0.704363	0.1526	0.512805	3.25766	3.34218	864		Ma et al., 2013a
09TB76	92.1	29.2	Ggabbro		0.027	0.704663	0.704627	0.704633	0.1562	0.512795	3.06259	3.14021	945		Ma et al., 2013a
09TB79	92.2	29.2789	Ggabbro	94.4	0.0533	0.704516	0.704445	0.704456	0.1539	0.512824	3.62829	3.71034	835		Ma et al., 2013a
09TB21-2	94	29.2	Diorite	91.6	0.1844	0.704579	0.704335	0.704374	0.1342	0.512788	2.92604	3.04576	698		Ma et al., 2013b
09TB22	94	29.2003	Diorite		0.1138	0.704521	0.704371	0.704395	0.141	0.512786	2.88703	2.99373	768		Ma et al., 2013b
09TB36	94	29.2114	Granodiorite	99.5	0.1992	0.704668	0.704405	0.704447	0.1194	0.512714	1.48253	1.63052	709		Ma et al., 2013b
09TB38-1	94	29.2	Diorite		0.1495	0.704561	0.704363	0.704395	0.1246	0.51275	2.18478	2.32284	688		Ma et al., 2013b
09TB38-2	94	29.2106	Granodiorite		0.1632	0.704559	0.704344	0.704379	0.1201	0.512738	1.95069	2.09736	674		Ma et al., 2013b
09TB39	94	29.18	Diorite		0.1108	0.70443	0.704283	0.704307	0.127	0.512737	1.93119	2.06465	729		Ma et al., 2013b
09TB41-1	94	29.2086	Granodiorite		0.1017	0.704411	0.704277	0.704299	0.1168	0.512738	1.95069	2.10368	652		Ma et al., 2013b
09TB41-3	94	29.2086	Diorite		0.072	0.704427	0.704332	0.704347	0.1269	0.512754	2.26281	2.39647	700		Ma et al., 2013b
09TB45-1	94	29.1972	Granodiorite	94.7	0.2954	0.704592	0.704202	0.704265	0.1214	0.512794	3.04308	3.18731	591		Ma et al., 2013b
09TB45-2	94	29.1656	Granodiorite		0.3472	0.704645	0.704187	0.704261	0.1157	0.512796	3.0821	3.23723	555		Ma et al., 2013b
09TB45-3	94	29.2097	Diorite		0.1191	0.704448	0.704291	0.704316	0.1444	0.512797	3.1016	3.20181	783		Ma et al., 2013b
09TB46-2	94	29.1828	Diorite	92	0.2109	0.704496	0.704218	0.704263	0.1294	0.51276	2.37985	2.50874	710		Ma et al., 2013b
09TB47-1	93.9	29.22	Diorite	88.7	0.0097	0.704231	0.704218	0.70422	0.1241	0.512768	2.5359	2.67494	653		Ma et al., 2013b
09TB47-3	93.9	29.1775	Diorite		0.173	0.704451	0.704223	0.70426	0.1316	0.512775	2.67245	2.79714	701		Ma et al., 2013b
09TB48-1	93.9	29.1631	Granodiorite		0.1727	0.704475	0.704247	0.704284	0.1203	0.51279	2.96506	3.11138	591		Ma et al., 2013b
09TB50	93.9	29.1183	Diorite		0.2501	0.704564	0.704234	0.704287	0.1307	0.512767	2.5164	2.6428	708		Ma et al., 2013b
09TB51-2	93.9	29.1233	Diorite	91.2	0.0904	0.704346	0.704227	0.704246	0.1203	0.512781	2.78949	2.93581	605		Ma et al., 2013b
09TB159	91.5	29.7	Mafic rock	92.3	0.0081	0.705324	0.705313	0.705315	0.1648	0.512713	1.46302	1.52413	1367		Ma et al., 2015
09TB160-1	91.5	29.65	Mafic rock	92.3	0.005	0.705729	0.705722	0.705723	0.1328	0.512743	2.04823	2.1706	770		Ma et al., 2015
09TB160-3	91.5	29.67	Mafic rock	92.3	0.0084	0.705783	0.705772	0.705774	0.1316	0.512722	1.63858	1.76323	797		Ma et al., 2015
09TB161	91.4	29.62	Mafic rock	92.3	0.0017	0.705235	0.705233	0.705233	0.1381	0.512742	2.02872	2.14095	827		Ma et al., 2015
09TB163	91.5	29.68	Mafic rock	92.3	0.0739	0.705189	0.705092	0.705108	0.1524	0.512796	3.0821	3.16699	885		Ma et al., 2015
09TB164	91.4	29.6	Mafic rock	92.3	0.0839	0.705098	0.704988	0.705006	0.1479	0.512761	2.39935	2.49284	905		Ma et al., 2015
09TB165	91.5	29.65	Mafic rock	92.3	0.2681	0.705236	0.704886	0.704943	0.1544	0.512785	2.86752	2.94858	943		Ma et al., 2015
09TB166	91.5	29.7	Mafic rock	92.3	0.0028	0.704944	0.70494	0.704941	0.1418	0.512746	2.10675	2.2119	860		Ma et al., 2015
09TB167	91.5	29.7	Mafic rock	92.3	0.0114	0.704823	0.704808	0.70481	0.1455	0.512743	2.04823	2.14629	913		Ma et al., 2015
09TB170	91.5	29.7	Mafic rock	92.3	0.1086	0.705026	0.704884	0.704907	0.1543	0.512854	4.2135	4.2948	764		Ma et al., 2015
09TB171	91.6	29.71	Mafic rock	92.3	0.0331	0.704749	0.704706	0.704713	0.1509	0.512793	3.02358	3.11134	870		Ma et al., 2015
09TB172	91.5	29.67	Mafic rock	92.3	0.0354	0.705123	0.705077	0.705085	0.1539	0.512784	2.84801	2.93003	937		Ma et al., 2015
09TB173	91.5	29.62	Mafic rock	92.3	0.0282	0.704896	0.704859	0.704865	0.1589	0.5128	3.16012	3.23259	978		Ma et al., 2015
11DZ01-2	91.4	29.6	Mafic rock	92.3	0.0046	0.70569	0.705684	0.705685	0.1341	0.512708	1.36549	1.48534	849		Ma et al., 2015
11DZ02-1	91.4	29.7	Mafic rock	92.3	0.0429	0.704874	0.704818	0.704827	0.1497	0.512597	-0.799785	-0.709866	1321		Ma et al., 2015
11DZ03-1	91.5	29.72	Mafic rock	92.3	0.1492	0.705151	0.704955	0.704987	0.12	0.512574	-1.24844	-1.1017	941		Ma et al., 2015
11DZ04-3	91.5	29.74	Mafic rock	92.3	0.0286	0.7049	0.704863	0.704869	0.1439	0.512571	-1.30697	-1.20597	1269		Ma et al., 2015
11DZ05-1	91.6	29.71	Mafic rock	92.3	0.0011	0.704722	0.70472	0.70472	0.1508	0.512661	0.44866	0.53652	1188		Ma et al., 2015
11DZ05-2	91.5	29.7	Mafic rock	92.3	0.0034	0.704737	0.704732	0.704733	0.1492	0.51266	0.429153	0.520074	1163		Ma et al., 2015
11DZ06	91.6	29.71	Mafic rock	92.3	0.029	0.704993	0.704955	0.704961	0.1379	0.512631	-0.136549	-0.0240226	1046		Ma et al., 2015
11DZ07-1	91.5	29.67	Mafic rock	92.3	0.0034	0.704533	0.704529	0.70453	0.1553	0.512703	1.26795	1.34723	1171		Ma et al., 2015
11DZ09-1	91.4	29.62	Mafic rock	92.3	0.0108	0.704937	0.704922	0.704924	0.1644	0.512661	0.44866	0.510492	1518		Ma et al., 2015
11DZ10	91.6	29.71	Mafic rock	92.3	0.076	0.705019	0.70492	0.704936	0.1645	0.512555	-1.61908	-1.55751	1847		Ma et al., 2015
11DZ13-2	91.6	29.72	Mafic rock	92.3	0.1535	0.705299	0.705098	0.705131	0.1779	0.512746	2.10675	2.14281	1725		Ma et al., 2015
12LS209	93.5	29.17	Granitoid		0.1287	0.704474	0.704331	0.704358	0.098016	0.512713	1.46302	1.65194	577	681	Tang et al., 2019
12LS215	93.5	29.15	Granitoid		0.1932	0.704754	0.70454	0.704581	0.099323	0.512644	0.117042	0.303406	675	791	Tang et al., 2019
12LS217	93.5	29.12	Granitoid	77	0.2237	0.704575	0.704327	0.704375	0.095848	0.512692	1.05337	1.24642	593	712	Tang et al., 2019
12LS256	93.1	29.11	Granitoid		0.7157	0.705361	0.704568	0.70472	0.111404	0.51261	-0.546194	-0.382976	805	855	Tang et al., 2019
12LS257	93.2	29.12	Granitoid	77	0.574	0.705369	0.704733	0.704855	0.105195	0.512627	-0.214576	-0.0394626	735	823	Tang et al., 2019
12LS269	93.1	29	Granitoid	81.3	0.4037	0.705248	0.704801	0.704887	0.108456	0.512622	-0.312111	-0.143242	765	834	Tang et al., 2019
12LS274	93.4	29.08	Granitoid	78.4	0.3033	0.704703	0.704367	0.704432	0.101383	0.512676	0.741264	0.923709	553	679	Tang et al., 2019
12LS276	93.8	29.13	Granitoid	80	0.2724	0.704623	0.704321	0.704379	0.092577	0.512711	1.42401	1.62333	644	742	Tang et al., 2019
12LS278	93.8	29.14	Granitoid	78.1	0.1701	0.704522	0.704334	0.70437	0.094534	0.5127	1.20943	1.405	576	699	Tang et al., 2019
ST124A	91.5	29.3	Monzobiorite	89.3	0.424	0.704368	0.7038	0.70389	0.1092	0.512797	3.1016	3.26918	520		Wen , 2007
ST125A	91.5	29.3	Monzonite granite	95	2.179	0.706903	0.704	0.704464	0.0988	0.512758	2.34083	2.52828	520		Wen , 2007
ST126A	91.5	29.3	Diorite	95	0.201	0.704079	0.7038	0.703843	0.112	0.512807	3.29667	3.4589	520		Wen , 2007
ST129A	89.6	29.39	Monzonite	94.1	0.344	0.704158	0.7037	0.703773	0.1267	0.512817	3.49174	3.62584	580		Wen , 2007
ST130	89.6	29.45	Monzonite	94	1.146	0.705161	0.7036	0.703844	0.1218	0.512823	3.60878	3.75226	540		Wen , 2007
ST132A	89.6	29.5	Diorite	94	0.24	0.704744	0.7044	0.704451	0.1555	0.512886	4.83772	4.91675	690		Wen , 2007
ST135A	89.6	29.54	Granodiorite	94	0.682	0.705108	0.7042	0.704345	0.1177	0.512756	2.30182	2.4531	630		Wen , 2007
ST141A	89.1	29.4	Gabbro	90.5	0.344	0.704263	0.7038	0.703873	0.1317	0.512799	3.14062	3.26513	650		Wen , 2007
ST143A	89.9	29.31	Gabbro	84.8	0.407	0.704314	0.7038	0.703887	0.1282	0.512839	3.9209	4.05214	550		Wen , 2007
ST144A	89.9	29.32	Monzobiorite	85.2	0.406	0.704375	0.7039	0.703986	0.1293	0.512849	4.11596	4.24511	540		Wen , 2007
ST145	90.2	29.35	Gabbro	85	0.177	0.704148	0.7039	0.703938	0.1249	0.512768	2.5359	2.67341	660		Wen , 2007
ST146A	90.2	29.35	Granodiorite	102	0.557	0.704034	0.7032	0.703319	0.1133	0.512833	3.80385	3.96361	480		Wen , 2007
T020A	93.9	29.2	Diorite	103	0.069	0.704336	0.7042	0.704215	0.1348	0.512763	2.43837	2.55692	750		Wen , 2007
T022	93.9	29.13	Gabbro	103	0.163	0.704507	0.7043	0.704335	0.1333	0.512793	3.02358	3.14502	680		Wen , 2007
T024	93.8	29.14	Tonalite	80.4	0.161	0.704562	0.7044	0.704434	0.0956	0.512702	1.24844	1.44198	580		Wen , 2007
T025	93.6	29.17	Granodiorite	80	0.163	0.704622	0.7044	0.704435	0.1202	0.512689	0.994854	1.1413	770		Wen , 2007
T026	93.5	29.12	Granodiorite	80	0.247	0.704693	0.7044	0.704453	0.0896	0.512747	2.12626	2.3313	510		Wen , 2007
T027	93.3	29	Tonalite	82.7	0.192	0.70472	0.7045	0.704541	0.1055	0.512699	1.18992	1.36451	640		Wen , 2007
T028	93.2	29.04	Granodiorite	103	1.427	0.706228	0.7041	0.704404	0.1152	0.512692	1.05337	1.20939	710		Wen , 2007
T035B	90.3	29.29	Gabbro	102	0.033	0.704038	0.704	0.704007	0.1526	0.51286	4.33054	4.4151	720		Wen , 2007
T036A	90.3	29.32	Gabbro	102.2	0.07	0.704335	0.7042	0.704215	0.1532	0.51285	4.13547	4.21888	760		Wen , 2007
T036B	90.3	29.32	Gabbro	102.2	0.075	0.704257	0.7041	0.704116	0.1745	0.512811	3.3747	3.41731	1320		Wen , 2007
T036C	90.3	29.32	Monzonite	102.2	0.603	0.704553	0.7037	0.703828	0.1212	0.512745	2.08724	2.23181	670		Wen , 2007
T108A	89.6	29.39	Gabbro	94	0.083	0.703861	0.7037	0.703718	0.1332	0.512805	3.25766	3.37931	650		Wen , 2007
T108B	89.6	29.39	Diorite	94	0.151	0.703955	0.7038	0.703832	0.1278	0.512799	3.14062	3.2726	620		Wen , 2007
T212	93.3	29	Granodiorite	80	0.42	0.705239	0.7048	0.704889	0.1089	0.512637	-0.0195069	0.148524	750		Wen , 2007
T213	93.3	29.04	Tonalite	80	0.19	0.704591	0.7044	0.70444	0.1165	0.512748	2.14576	2.29933	630		Wen , 2007
T215	93.4	29.1	Granodiorite	80	0.209	0.7047	0.7045	0.704545	0.087	0.512664	0.507181	0.717143	590		Wen , 2007
T216A	93.6	29.17	Tonalite	80	0.135	0.704525	0.7044	0.704429	0.0936	0.512706	1.32647	1.52383	560		Wen , 2007
T217	93.7	29.14	Granodiorite	80	0.185	0.704655	0.7044	0.704439	0.0992	0.512673	0.682743	0.869364	640		Wen , 2007
T218B	93.8	29.14	Granodiorite	80	0.172	0.704581	0.7044	0.704437	0.1047	0.512709	1.38499	1.56111	620		Wen , 2007
T321	90.4	29.26	Gabbroic diorite	90.8	0.27	0.704307	0.70397	0.704028	0.142	0.512845	4.03794	4.14277		650	Xu et al., 2015
T323	90.4	29.26	Gabbroic diorite		0.112	0.704114	0.70397	0.703994	0.145	0.512842	3.97942	4.07851		680	Xu et al., 2015
T367	90.3	29.47	Granodiorite		0.747	0.704782	0.70385	0.704009	0.117	0.512789	2.94555	3.09819		570	Xu et al., 2015
T369	90.3	29.47	Granodiorite		0.669	0.70469	0.70385	0.703993	0.109	0.512804	3.23815	3.40611		500	Xu et al., 2015
T433	89.1	29.42	Gabbro	94	0.155	0.704113	0.70392	0.703953	0.133	0.512808	3.31618	3.43821		640	Xu et al., 2015
T435	89.1	29.42	Gabbroic diorite		0.134	0.704146	0.70398	0.704009	0.127	0.51276	2.37985	2.51333		690	Xu et al., 2015
T438	89.1	29.42	Gabbroic diorite		0.095	0.703933	0.70381	0.70383	0.132	0.512818	3.51125	3.6352		620	Xu et al., 2015
12FW149	89.1	29.13	Rodingite	125.7					0.2389	0.51309	8.81714	8.73671	364		Zhang et al., 2016
12FW150	89.1	29.14	Gabbro	125.7	0.0567	0.70515	0.704942	0.704954	0.2152	0.513072	8.46601	8.43093	7309		Zhang et al., 2016
12FW152	89.1	29.13	Gabbro	124.6	0.0165	0.705102	0.705041	0.705045	0.226	0.513091	8.83664	8.7809	731		Zhang et al., 2016
12FW153	89.1	29.14	Gabbro	124.6	0.0052	0.704922	0.704903	0.704904	0.2161	0.513075	8.52453	8.48773	4597		Zhang et al., 2016
12FW156	89.1	29.13	Plagiogranite	124.7	0.022	0.704003	0.703922	0.703927	0.2196	0.51306	8.23193	8.18841	2310		Zhang et al., 2016
12FW159	89.1	29.13	Plagiogranite	124.7	0.0075	0.704289	0.704261	0.704263	0.2289	0.513075	8.52453	8.46323	748		Zhang et al., 2016
12FW160	89.1	29.14	Plagiogranite	124.7	0.0057	0.705004	0.704983	0.704984	0.2183	0.513064	8.30996	8.26893	2818		Zhang et al., 2016
PC02	89.2	29.18	Rodingite	129					0.2245	0.513104	9.09024	9.03737	637		Zhang et al., 2016
PC03	89.2	29.18	Rodingite	129					0.1998	0.513069	8.40749	8.40188	901		Zhang et al., 2016
PC06	89.2	29.18	Plagiogranite	129	0.1095	0.705304	0.704902	0.704925	0.2295	0.513123	9.46087	9.39845	256		Zhang et al., 2016
PC07	89.2	29.18	Plagiogranite	129					0.2238	0.51309	8.81714	8.76561	917		Zhang et al., 2016
PC08	89.2	29.18	Diabase	129	0.1131	0.705068	0.704653	0.704677	0.2172	0.513094	8.89517	8.85627	2361		Zhang et al., 2016
PC09	89.2	29.18	Diabase	129	0.0165	0.705344	0.705283	0.705287	0.2013	0.51307	8.427	8.41851	1052		Zhang et al., 2016
BB-112	93.2	29.1	Granodiorite	103.1	0.262	0.704633	0.704249	0.704305	0.274561	0.512785	2.86752	2.71862		1322	Zheng et al., 2013
BB-113	93.2	29.1	Granite	76.3	0.998	0.705783	0.704677	0.70489	0.194958	0.512658	0.390139	0.393487		1143	Zheng et al., 2013
BB-114	93.2	29.15	Granite	79.7	1.661	0.706185	0.704345	0.704699	0.220168	0.512699	1.18992	1.14506		1217	Zheng et al., 2013
BB-115	93.2	29.1	Granite		0.26	0.70472	0.704432	0.704487	0.147015	0.512683	0.877812	0.972932		882	Zheng et al., 2013
BB-116	93.2	29.13	Granite	76.1	0.169	0.704561	0.704374	0.70441	0.149438	0.512707	1.34598	1.43648		855	Zheng et al., 2013
BB-41	93.2	29.05	Granodiorite		0.183	0.704566	0.7044	0.704439	0.117344	0.512747	2.12626	2.27821		641	Zheng et al., 2013
BB-42	93.2	29	Lamprophyre	96.6	0.415	0.704846	0.70388	0.703968	0.127471	0.512735	1.89217	2.02473		708	Zheng et al., 2013
BB-59	93.2	29.1	Granite		0.487	0.705405	0.704964	0.705068	0.099341	0.512629	-0.175562	0.0107561		744	Zheng et al., 2013
BB-66	93.2	29.05	Granite		0.459	0.704999	0.704584	0.704682	0.12431	0.512726	1.71661	1.85522		707	Zheng et al., 2013
BB-68	93.2	29.12	Granite		0.183	0.705427	0.705262	0.705301	0.108986	0.512708	1.36549	1.5334		664	Zheng et al., 2013
NR-15	93.2	29.15	Diorite		0.271	0.704344	0.703979	0.704037	0.1832	0.512771	2.59442	2.62036		911	Zheng et al., 2013
NR-16	93.2	29.1	Diorite		0.29	0.704417	0.704026	0.704088	0.181048	0.512765	2.47738	2.50743		911	Zheng et al., 2013
MM02-2	92	29.2535	Andesite	136.5	0.0961	0.70532	0.70513	0.70515	0.1081	0.512748	2.14576	2.31541			Zhu et al., 2009
MM02-3	92	29.2535	Andesite	136.5	0.5612	0.705221	0.70413	0.70425	0.1089	0.512859	4.31103	4.47923			Zhu et al., 2009
MM02-4	92	29.2535	Andesite	136.5	0.237	0.705132	0.70467	0.70472	0.1081	0.512763	2.43837	2.60802			Zhu et al., 2009
MM02-6	92	29.2535	Andesite	136.5	0.3314	0.705207	0.70456	0.704631	0.1122	0.512763	2.43837	2.60018			Zhu et al., 2009
Paleocene
14GT004	94.5	29.5	hornblende gabbros	50.3	0.40043	0.70636	0.706074	0.706074	0.152029	0.512518	-2.34083	-2.25543	1562.27		Guo et al., 2019
T774	94.5	29.5	gneissic granite	50.4	0.30269	0.707271	0.707054	0.707054	0.0938809	0.512309	-6.41778	-6.22125	1070.64		Guo et al., 2019
T775-1	94.5	29.5	gneissic granite		0.300968	0.707554	0.707339	0.707339	0.0989727	0.51236	-5.42293	-5.2361	1050.47		Guo et al., 2019
T775-2	94.5	29.5	gneissic granite		0.225519	0.70775	0.707589	0.707589	0.0994756	0.512317	-6.26173	-6.0759	1112.3		Guo et al., 2019
T777	94.5	29.5	gneissic granite		0.167603	0.708282	0.708162	0.708162	0.0952659	0.512263	-7.3151	-7.12125	1142.15		Guo et al., 2019
LS2	89.8	29.6	Granite	51	1.395	0.706161		0.705446	0.1191	0.512561	-1.50203	-1.35358	950		Huang et al, 2010 (in Chinese)
LS4	91.15	29.65	Diorite		0.179	0.704709		0.704633	0.1341	0.512722	1.63858	1.75845	820		Huang et al, 2010 (in Chinese)
LS5	91.15	29.65	Diorite	61	0.223	0.704923		0.704777	0.1404	0.512713	1.46302	1.57082	910		Huang et al, 2010 (in Chinese)
LS7	91.15	29.65	Granite		1.076	0.705519		0.704967	0.1157	0.51268	0.819292	0.97434	730		Huang et al, 2010 (in Chinese)
13SS-01	86.28	29.63	Granodiorite	52.71	1.79	0.707826	0.706455	0.706836	0.11	0.512417	-4.31103	-4.14527	1070	1160	Huang et al., 2019
13SS-02	86.28	29.63	Granodiorite	53.75	2.36	0.708579	0.706767	0.70727	0.1	0.512379	-5.0523	-4.86742	1.03	1220	Huang et al., 2019
13SS-03	86.28	29.63	Granodiorite	53.95	1.14	0.707365	0.70649	0.706733	0.11	0.512385	-4.93526	-4.76952	1090	1210	Huang et al., 2019
07TB22b	91.8214	29.2658	Granodiorite		0.6091	0.705157	0.704621	0.704871	0.121	0.512729	1.77513	1.92007	700		Jiang et al., 2014
07TB23	91.8197	29.265	Granodiorite		0.7785	0.705341	0.704655	0.704976	0.1043	0.512719	1.58006	1.75696	600		Jiang et al., 2014
07TB24a	91.8181	29.2642	Granite		0.5516	0.705367	0.704881	0.704999	0.0929	0.512705	1.30697	1.50567	560		Jiang et al., 2014
07TB24c	91.8167	29.265	Granite		0.499	0.705174	0.704734	0.704841	0.0962	0.512691	1.03387	1.22624	600		Jiang et al., 2014
07TB25a	91.8086	29.2622	Granite	62	0.5234	0.705113	0.704652	0.704763	0.1143	0.512708	1.36549	1.52323	680		Jiang et al., 2014
07TB25b	91.8086	29.2622	Granite	61.3	0.359271	0.705059	0.704743	0.704819	0.123111	0.512697	1.15091	1.29179	770		Jiang et al., 2014
07TB28a	91.4153	29.3553	Diorite	61.5	0.1473	0.704665	0.704535	0.704568	0.1181	0.512784	2.84801	2.99855	590		Jiang et al., 2014
07TB31	91.44	29.3519	Diorite		0.1128	0.70439	0.704291	0.704315	0.1136	0.512778	2.73097	2.89011	570		Jiang et al., 2014
07TB32	91.4	29.3	Diorite		0.1935	0.704672	0.704502	0.704544	0.1107	0.512821	3.56977	3.73449	490		Jiang et al., 2014
09TB119	91.4325	29.3539	Diorite		0.3151	0.704503	0.704225	0.704295	0.1276	0.512793	3.02358	3.15593	640		Jiang et al., 2014
WR-12-30B	88.3197	29	Monzonite	67.7	1.304	0.70583	0.70458	0.704854	0.1136	0.512657	0.370632	0.529682			Wang R et al., 2015a
WR12-33	86.3183	29.5547	Granodiorite	50.7	0.51	0.70664	0.70627	0.706381	0.1098	0.512404	-4.56462	-4.39849			Wang R et al., 2015b
ET021D	91.63	29.69	Monzogranite	64.6	1.448	0.705844	0.7045	0.704824	0.1031	0.512804	3.23815	3.41741	480		Wen, 2007
ET021E	91.63	29.69	Gabbro	64	0.292	0.704461	0.7042	0.704258	0.1381	0.512789	2.94555	3.05781	730		Wen, 2007
ST042B	88.25	29.5	Granodiorite	50.7	1.197	0.705637	0.7048	0.70503	0.1148	0.51269	1.01436	1.17114	710		Wen, 2007
ST043B	88.23	29.45	Granodiorite	50.4	1.187	0.705663	0.7048	0.705066	0.1176	0.512673	0.682743	0.83415	760		Wen, 2007
ST102A	91.84	29.48	Monzogranite	60	1.496	0.705632	0.7044	0.704676	0.1331	0.512754	2.26281	2.38461	750		Wen, 2007
ST103A	91.88	29.44	Gabbro	60	0.25	0.704689	0.7045	0.704529	0.1306	0.512746	2.10675	2.23333	740		Wen, 2007
ST104A	91.81	29.27	Granodiorite	60.1	0.597	0.705025	0.7045	0.704642	0.119	0.512725	1.6971	1.84587	680		Wen, 2007
ST104B	91.81	29.27	Granodiorite	60.1	0.354	0.705123	0.7048	0.704896	0.1192	0.512724	1.6776	1.82598	690		Wen, 2007
ST105A	91.85	29.26	Diorite	60	0.558	0.704863	0.7044	0.704506	0.1201	0.512738	1.95069	2.09736	670		Wen, 2007
ST110A	92.01	29.24	Granodiorite	60	1.287	0.705837	0.7047	0.705014	0.121	0.512702	1.24844	1.39337	740		Wen, 2007
ST111A	92.09	29.29	Gabbro	60	0.18	0.70621	0.7061	0.706095	0.1299	0.512613	-0.487674	-0.35985	980		Wen, 2007
ST117A	92.19	29.25	Granodiorite	60.5	0.802	0.705704	0.705	0.705186	0.1179	0.512625	-0.25359	-0.102793	840		Wen, 2007
ST147A	90.18	29.4	Diorite	50.6	0.221	0.704364	0.7042	0.704252	0.1299	0.512831	3.76484	3.89282	580		Wen, 2007
ST152A	90.69	29.33	Gabbro	52.7	0.007	0.703856	0.7039	0.703852	0.1492	0.512855	4.23301	4.32407	700		Wen, 2007
T033	90.72	29.33	Diorite	52.7	0.219	0.704212	0.704	0.704095	0.1283	0.512839	3.9209	4.05195	560		Wen, 2007
T043A	88.55	29.45	Monzogranite	50	1.251	0.705663	0.7048	0.705041	0.1025	0.512609	-0.565701	-0.385443	740		Wen, 2007
T043B	88.53	29.4	Syenogranite	50	10.76	0.712785	0.7051	0.707435	0.0638	0.512569	-1.34598	-1.09169	590		Wen, 2007
T043C	88.55	29.45	Syenogranite	50	8.681	0.710843	0.7047	0.706527	0.0714	0.51258	-1.1314	-0.891647	610		Wen, 2007
T043E	88.6	29.5	Syenogranite	50	23.75	0.722063	0.7052	0.710254	0.0995	0.512598	-0.780278	-0.594286	740		Wen, 2007
T043F	88.55	29.45	Granite	50	9.312	0.710665	0.7041	0.706035	0.0819	0.512582	-1.09239	-0.872726	660		Wen, 2007
T057A	90.72	29.36	Monzodiorite	50	0.417	0.704593	0.7043	0.704386	0.1264	0.512757	2.32133	2.45595	690		Wen, 2007
T057B	90.72	29.36	Diorite	50	0.179	0.704252	0.7041	0.704163	0.1311	0.51283	3.74533	3.87102	590		Wen, 2007
T059A	90.07	29.51	Granodiorite	50	0.517	0.704718	0.7044	0.704461	0.135	0.512725	1.6971	1.81525	820		Wen, 2007
T059B	90.07	29.51	Diorite	50	0.542	0.704679	0.7043	0.70441	0.1201	0.512706	1.32647	1.47312	720		Wen, 2007
T076A	91.22	29.67	Granodiorite	59.3	0.834	0.70543	0.7047	0.704905	0.105	0.512699	1.18992	1.36546	630		Wen, 2007
T084A	90.79	29.75	Granodiorite	59.4	0.924	0.705507	0.7047	0.704924	0.1251	0.512665	0.526687	0.663735	830		Wen, 2007
T084B	90.79	29.75	Monzogranite	59.4	2.413	0.706675	0.7046	0.705153	0.111	0.512632	-0.117042	0.0469662	770		Wen, 2007
Miocene
ZM-10	87.4667	29.6583	Adakitic porphyry		0.948	0.70814	0.70793	0.708132	0.1054	0.51227	-7.17855	-7.0041			Gao et al., 2010
ZM-2	87.4667	29.6583	Adakitic porphyry		0.955	0.70805	0.70785	0.708053	0.1063	0.51232	-6.20321	-6.03043			Gao et al., 2010
ZM-3	87.4667	29.6583	Adakitic porphyry		0.512	0.70738	0.70727	0.707379	0.1369	0.51227	-7.17855	-7.06438			Gao et al., 2010
ZM-4	87.4667	29.6583	Adakitic porphyry		1.625	0.70749	0.70714	0.707486	0.1201	0.51243	-4.05744	-3.911			Gao et al., 2010
ZM-5	87.4667	29.6583	Adakitic porphyry		0.748	0.70976	0.7096	0.709759	0.1092	0.51227	-7.17855	-7.01137			Gao et al., 2010
ZM-6	87.4667	29.6583	Adakitic porphyry		0.481	0.7075	0.7074	0.707502	0.1162	0.51228	-6.98349	-6.82969			Gao et al., 2010
ZM-7	87.4667	29.6583	Adakitic porphyry		0.508	0.70784	0.70773	0.707838	0.093	0.51226	-7.37362	-7.17544			Gao et al., 2010
ZM-9	87.4667	29.6583	Adakitic porphyry		0.894	0.70752	0.70733	0.70752	0.1084	0.51235	-5.618	-5.44922			Gao et al., 2010
QL02-04-2	91.6	29.63	Ore-bearing adakite	16.8	0.1601	0.704881	0.704852	0.704852	0.1163	0.512664	0.507181	0.661069			Hou et al., 2015
QL02-16	91.6	29.63	Ore-bearing adakite	16.8	0.2159	0.704899	0.704839	0.704839	0.1096	0.512649	0.214576	0.381276			Hou et al., 2015
Cj-02	90	29.6	Monzogranite porphyry	15.6	5.849	0.706424	0.705	0.705	0.09176	0.512679	0.799785	1.00065			Hou et al., 2004
Cj-20	90	29.6	Diorite porphyry	14.5	1.586	0.705598	0.7052	0.7052	0.09698	0.512529	-2.12626	-1.93549			Hou et al., 2004
Cj-22	90	29.6	Monzogranite porphyry	15.6	0.76	0.705746	0.7051	0.7051	0.09519	0.512568	-1.36549	-1.17127			Hou et al., 2004
Dzl-01	91.4	29.5	Monzonite porphyry	13.4	1.03	0.705444	0.7052	0.7052	0.09987	0.512662	0.468167	0.653497			Hou et al., 2004
Dzl-05	91.4	29.5	Monzonite porphyry	13.4	0.39	0.705146	0.705	0.705	0.0952	0.512728	1.75562	1.94994			Hou et al., 2004
Dzl-06	91.4	29.5	Monzonite porphyry	13.4	0.44	0.705163	0.705	0.705	0.09825	0.51268	0.819292	1.00774			Hou et al., 2004
Dzl-07	91.4	29.5	Monzonite porphyry	13.4	2.031	0.705201	0.7047	0.7047	0.09498	0.512733	1.85316	2.0479			Hou et al., 2004
Jm-16	91.75	29.7	Granite porphyry	14.9	4.206	0.70792	0.7069	0.7069	0.09424	0.512559	-1.54105	-1.34502			Hou et al., 2004
Jm-23	91.75	29.7	Granite porphyry	14.9	4.791	0.70736	0.7062	0.7062	0.09189	0.512565	-1.42401	-1.22348			Hou et al., 2004
Jmy-01	91.75	29.7	Granite porphyry	14.9	2.238	0.707358	0.7068	0.7068	0.09115	0.512511	-2.47738	-2.27547			Hou et al., 2004
Jmy-04	91.75	29.7	Granite porphyry	14.9	4.403	0.707536	0.7065	0.7065	0.09272	0.512313	-6.33976	-6.141			Hou et al., 2004
Jmy-07	91.75	29.7	Granite porphyry	14.9	2.598	0.707029	0.7064	0.7064	0.07715	0.512517	-2.36034	-2.13163			Hou et al., 2004
Ng-16	90.91	29.49	Monzogranite porphyry	16	0.194	0.705126	0.705	0.705	0.08179	0.512459	-3.49174	-3.27196			Hou et al., 2004
Ng-18	90.91	29.49	Monzogranite porphyry	16	0.236	0.704907	0.7048	0.7048	0.09399	0.512702	1.24844	1.44506			Hou et al., 2004
Nmy-04	90.91	29.49	Monzogranite porphyry	16	0.561	0.705275	0.7051	0.7051	0.09606	0.51274	1.98971	2.18239			Hou et al., 2004
PI-18	90.91	29.49	Monzogranite porphyry	16	0.299	0.705064	0.7049	0.7049	0.09453	0.512716	1.52154	1.71713			Hou et al., 2004
PI-28	90.91	29.49	Monzogranite porphyry	16	0.622	0.705316	0.7051	0.7051	0.0926	0.512651	0.25359	0.452826			Hou et al., 2004
BB-82	94.5	29.57	Barren porphyry	26.2	0.211	0.706336	0.706257	0.706257	0.08	0.512467	-3.33569	-3.11			Hou et al., 2013
BB-88	94.5	29.57	Barren porphyry	26.2	0.456	0.707538	0.707368	0.707368	0.097	0.512304	-6.51532	-6.32			Hou et al., 2013
BB-95	94.5	29.57	Barren porphyry	26.2	0.32	0.708559	0.70844	0.70844	0.105	0.512359	-5.44244	-5.27			Hou et al., 2013
Czk051-174	90.05	29.68	Monzogranite	15.6	0.973	0.706445	0.706229	0.706229	0.099	0.512468	-3.31618	-3.12933			Hou et al., 2013
Czk051-200	89.95	29.65	Monzogranite	15.6	1.463	0.705714	0.70539	0.70539	0.096	0.512508	-2.5359	-2.34328			Hou et al., 2013
Czk051-477	90	29.6	Monzogranite	15.6	1.22	0.706094	0.705824	0.705824	0.079	0.51245	-3.66731	-3.44219			Hou et al., 2013
Czk051-83	89.95	29.65	Monzogranite	15.6	0.711	0.706331	0.706173	0.706173	0.099	0.512381	-5.01328	-4.8265			Hou et al., 2013
Czk121-85	89.9	29.5	Monzogranite	15.6	3.361	0.706864	0.706119	0.706119	0.102	0.512441	-3.84287	-3.66178			Hou et al., 2013
Czk141-292	90.1	29.7	Monzogranite	15.6	1.174	0.706043	0.705783	0.705783	0.103	0.512428	-4.09646	-3.91729			Hou et al., 2013
QL02-1	91.5	29.57	Granodiorite	16.8	0.168	0.704893	0.704853	0.704853	0.1107	0.512646	0.156056	0.320648			Hou et al., 2013
QL02-7	91.65	29.7	Granodiorite	16.8	0.191	0.70529	0.705244	0.705244	0.1091	0.512664	0.507181	0.674848			Hou et al., 2013
QL02-8	91.65	29.7	Granodiorite	16.8	0.23	0.705271	0.705216	0.705216	0.1089	0.512675	0.721757	0.889815			Hou et al., 2013
QL601-203	91.66	29.66	Monzogranite	16.8	1.571	0.705468	0.705093	0.705093	0.0949	0.512645	0.136549	0.331378			Hou et al., 2013
QL601-312	91.66	29.66	Monzogranite	16.8	0.588	0.705331	0.705191	0.705191	0.0958	0.512619	-0.370632	-0.177544			Hou et al., 2013
QL601-328	91.55	29.6	Monzogranite	16.8	0.443	0.705139	0.705033	0.705033	0.1039	0.512663	0.487674	0.665292			Hou et al., 2013
QL601-522	91.6	29.63	Monzogranite	16.8	0.585	0.705407	0.705267	0.705267	0.0993	0.51259	-0.936333	-0.749965			Hou et al., 2013
QZK-260	91.6	29.63	Monzogranite	16.8	6.52	0.706271	0.704715	0.704715	0.0881	0.512545	-1.81415	-1.60638			Hou et al., 2013
QZK-296	91.6	29.63	Monzogranite	16.8	3.992	0.705812	0.70486	0.70486	0.0894	0.512582	-1.09239	-0.88708			Hou et al., 2013
QZK-365	91.5	29.57	Monzogranite	16.8	0.915	0.705248	0.70503	0.70503	0.1135	0.512611	-0.526687	-0.367479			Hou et al., 2013
QZK-50	91.55	29.6	Monzogranite	16.8	1.653	0.705629	0.705235	0.705235	0.0942	0.512566	-1.4045	-1.20839			Hou et al., 2013
2009-37	91.6	29.63	Ore-bearing adakite	16.6	0.2888	0.704975	0.704904	0.704966	0.0988	0.51264	0.0390139	0.226376	680		Hu et al., 2015
609-38	91.6	29.63	Ore-bearing adakite	16.7	0.3005	0.705016	0.704944	0.705008	0.0999	0.512659	0.409646	0.594917	660		Hu et al., 2015
803-30	91.6	29.63	Ore-bearing adakite		0.2775	0.70512	0.705053	0.705112	0.0878	0.512642	0.0780278	0.286443	620		Hu et al., 2015
803-31	91.6	29.63	Ore-bearing adakite		0.7212	0.705193	0.705019	0.705173	0.097	0.512628	-0.195069	-0.00427134	690		Hu et al., 2015
803-33	91.6	29.63	Ore-bearing adakite	16.9	0.529	0.705092	0.704965	0.705078	0.0993	0.512639	0.0195069	0.205911	680		Hu et al., 2015
803-35	91.6	29.63	Ore-bearing adakite	17	0.3396	0.705036	0.704954	0.705026	0.0977	0.51264	0.0390139	0.228481	670		Hu et al., 2015
803-36	91.6	29.63	Ore-bearing adakite		0.4388	0.705124	0.705016	0.705109	0.1	0.512644	0.117042	0.30211	680		Hu et al., 2015
805-25	91.6	29.63	Ore-bearing adakite	16.7	0.4002	0.70505	0.704958	0.705043	0.0997	0.512626	-0.234083	-0.0484539	710		Hu et al., 2015
805-26	91.6	29.63	Ore-bearing adakite		0.4401	0.705065	0.704956	0.70505	0.0977	0.512641	0.0585208	0.247989	670		Hu et al., 2015
ZK1119-03	90	29.6	Monzogranite porphyry		5.12631	0.7066	0.706647	0.707739	0.100864	0.512483	-3.03138	-2.84808			Hu et al., 2017
ZK1119-06	89.95	29.55	Monzogranite porphyry		0.877849	0.7062	0.706216	0.706403	0.0989609	0.512437	-3.93026	-3.74335			Hu et al., 2017
ZK1119-09	89.9	29.5	Monzogranite porphyry		0.996316	0.7063	0.706325	0.706537	0.0993533	0.512456	-3.5567	-3.37053			Hu et al., 2017
ZK1119-12	89.89	29.63	Monzogranite porphyry		0.860778	0.7061	0.706122	0.706305	0.0983602	0.512461	-3.45507	-3.267			Hu et al., 2017
ZK1407-05	89.91	29.65	Monzogranite porphyry	12.9	0.647124	0.7059	0.705926	0.706064	0.0922758	0.512499	-2.71381	-2.51406			Hu et al., 2017
ZK1407-09	90.1	29.62	Monzogranite porphyry	14.9	0.947071	0.7062	0.706249	0.706451	0.0958019	0.512459	-3.4933	-3.30034			Hu et al., 2017
ZK1407-12	90.05	29.6	Monzogranite porphyry	14.79	0.97221	0.7062	0.706053	0.70626	0.0974276	0.512449	-3.68915	-3.4993			Hu et al., 2017
ZK1407-13	90	29.58	Monzogranite porphyry		1.1703	0.7063	0.706341	0.706591	0.0949762	0.512448	-3.70495	-3.51041			Hu et al., 2017
ZK1407-14	90.02	29.53	Monzogranite porphyry		0.771724	0.7064	0.706419	0.706584	0.0988682	0.512441	-3.8376	-3.65052			Hu et al., 2017
ZN05	87.48	29.66	Granodiorite porphyry		1.926	0.70779	0.7074	0.70781	0.1067	0.5123	-6.59335	-6.42135			Huang et al., 2017
ZN06	87.5	29.7	Granodiorite porphyry		1.548	0.70742	0.7071	0.70743	0.1034	0.512319	-6.22271	-6.04439			Huang et al., 2017
ZN07	87.48	29.66	Granodiorite porphyry		1.942	0.70796	0.7076	0.708014	0.11	0.512255	-7.47116	-7.30551			Huang et al., 2017
ZN08	87.5	29.7	Monzogranite porphyry		1.004	0.70737	0.7072	0.707414	0.1057	0.5123	-6.59335	-6.41944			Huang et al., 2017
ZN09	87.45	29.6	Monzonitic granite porphyry	16.2	1.049	0.70741	0.7072	0.707423	0.117	0.512318	-6.24222	-6.08993			Huang et al., 2017
ZN10	87.45	29.6	Monzonitic granite porphyry		0.9313	0.7074	0.7072	0.707398	0.0981	0.512291	-6.76891	-6.58046			Huang et al., 2017
ZN11	87.52	29.72	Monzogranite porphyry		1.143	0.70782	0.7076	0.707843	0.1218	0.512272	-7.13954	-6.99647			Huang et al., 2017
ZN12	87.52	29.6	Diorite porphyry		1.758	0.70822	0.7078	0.708174	0.1119	0.512263	-7.3151	-7.15309			Huang et al., 2017
ZN13	87.48	29.66	Diorite porphyry		1.24	0.70803	0.7077	0.707964	0.1132	0.512265	-7.27609	-7.11656			Huang et al., 2017
ZN14	87.5	29.7	Diorite porphyry		0.9267	0.70779	0.7076	0.707797	0.1033	0.51228	-6.98349	-6.805			Huang et al., 2017
BR05-2	90	29.6	Ore-bearing adakite		1.7072	0.709443	0.709079	0.709443	0.0886	0.512318	-6.24222	-6.03558			Li et al., 2011
BR05-3	89.9	29.6	Ore-bearing adakite		0.3841	0.705832	0.70575	0.705832	0.0966	0.512504	-2.61393	-2.42246			Li et al., 2011
BR05-4	89.85	29.5	Ore-bearing adakite		0.4877	0.706271	0.706167	0.706271	0.0996	0.51243	-4.05744	-3.87177			Li et al., 2011
BR-15	89.85	29.5	Ore-bearing adakite		0.4874	0.706244	0.70614	0.706244	0.0959	0.512495	-2.78949	-2.59669			Li et al., 2011
BR-17	90	29.5	Ore-bearing adakite	14.2	0.4689	0.706173	0.706073	0.706173	0.1139	0.512411	-4.42808	-4.26978			Li et al., 2011
BR-18	90	29.5	Ore-bearing adakite	14.8	0.5782	0.705722	0.705599	0.705722	0.0998	0.512551	-1.6971	-1.51172			Li et al., 2011
DBQ-1	89.9583	29.57	Ore-bearing adakite		0.5631	0.706052	0.705932	0.706052	0.0988	0.512427	-4.11596	-3.92876			Li et al., 2011
QD-1	91.3833	29.55	Ore-bearing adakite	17.1	0.449	0.70656	0.706451	0.706547	0.1045	0.512629	-0.175562	0.00088287			Li et al., 2011
QDZK 001-116	91.3833	29.55	Ore-bearing adakite	19.1	0.1853	0.705633	0.705588	0.705627	0.1043	0.512611	-0.526687	-0.349873			Li et al., 2011
QDZK 001-216	91.3833	29.55	Ore-bearing adakite	19	0.1965	0.705927	0.70588	0.705922	0.1025	0.512612	-0.507181	-0.32692			Li et al., 2011
TG-39	90.35	29.4833	Ore-bearing adakite	16	0.6618	0.706393	0.706252	0.706393	0.107	0.512313	-6.33976	-6.16833			Li et al., 2011
TZK 1101-32	90.35	29.4833	Ore-bearing adakite		0.681	0.7075	0.707355	0.7075	0.1087	0.512278	-7.0225	-6.85435			Li et al., 2011
TBL07-04	93.075	29.9083	Granite porphyry	19.72	1.21793	0.707055	0.70671	0.706969	0.091366	0.512457	-3.53076	-3.3293	870		Wang et al, 2010 (in Chinese)
TBL07-06	93.075	29.9083	Granite porphyry	19.72	0.523042	0.706174	0.70603	0.706141	0.086376	0.512534	-2.02872	-1.81766	740		Wang et al, 2010 (in Chinese)
TBL07-07	93.075	29.9083	Granodiorite	19.72	0.341958	0.706207	0.70611	0.706183	0.104291	0.512492	-2.84801	-2.67127	920		Wang et al, 2010 (in Chinese)
TBL07-09	93.075	29.9083	Granodiorite	19.72	0.528955	0.70691	0.70676	0.706873	0.085681	0.512514	-2.41886	-2.20648	760		Wang et al, 2010 (in Chinese)
TBL07-10	93.075	29.9083	Granodiorite	19.72	0.305529	0.706216	0.70613	0.706195	0.103818	0.512527	-2.16527	-1.98759	870		Wang et al, 2010 (in Chinese)
TBL07-20	93.075	29.9083	Granite porphyry	19.72	0.354817	0.706078	0.70598	0.706056	0.092675	0.512535	-2.00922	-1.81021	780		Wang et al, 2010 (in Chinese)
BP-1	92.05	29.8	Granite	16	1.939	0.7067	0.70626	0.706673	0.1451	0.512588	-0.975347	-0.876632			Wang R et al., 2015a
JR-5	88.8878	29.6567	Monzonite porphyry	16.2	0.372	0.70574	0.70566	0.705739	0.1232	0.512458	-3.51125	-3.37072			Wang R et al., 2015a
WR-13-100	91.6142	29.6083	Monzonite porphyry	14	0.614	0.70668	0.70656	0.706691	0.1076	0.512297	-6.65187	-6.4816			Wang R et al., 2015a
T358	90.35	29.4833	Porphyry	14.2	0.4	0.7057	0.70562	0.705705	0.098	0.512505	-2.59442	-2.40563	850		Xu et al., 2010
T379	90	29.6	Granodiorite		0.581	0.70633	0.70621	0.706334	0.098	0.512424	-4.17449	-3.98575	960		Xu et al., 2010
T380	90	29.6	Granodiorite	14.3	0.564	0.70612	0.70601	0.70613	0.103	0.512436	-3.9404	-3.76123	990		Xu et al., 2010
T381	90	29.6	Granodiorite	14	0.651	0.70611	0.70598	0.706119	0.102	0.512449	-3.68681	-3.50571	950		Xu et al., 2010
T399	88.3333	29.8333	Porphyry	14.3	0.829	0.70693	0.70677	0.706947	0.103	0.51233	-6.00814	-5.82904	1130		Xu et al., 2010
T400	88.3333	29.8333	Porphyry		0.795	0.70699	0.70684	0.707009	0.103	0.512347	-5.67652	-5.49741	1110		Xu et al., 2010
T401	88.4	29.9	Granite		0.93	0.70835	0.70816	0.708358	0.098	0.512215	-8.25144	-8.06286	1230		Xu et al., 2010
T403	88.29	29.78	Granite	14.4	1.716	0.70677	0.70642	0.706786	0.107	0.512363	-5.36441	-5.19294	1130		Xu et al., 2010
T404	88.4167	29.8333	Granite	14.4	1.343	0.70784	0.70757	0.707856	0.1	0.512251	-7.54919	-7.36441	1200		Xu et al., 2010
12ZN-01	87.28	29.39	Monzonitic granite porphyry		1.08	0.707112	0.70692	0.70715	0.1	0.512299	-6.61285	-6.42804	1150		Zheng et al., 2017
12ZN-02	87.28	29.39	Monzonitic granite porphyry	12.4	0.69	0.708191	0.708068	0.708215	0.1	0.512283	-6.92496	-6.74016	1310		Zheng et al., 2017
12ZN-04	87.28	29.39	Granite porphyry		12.75	0.713883	0.71162	0.714336	0.09	0.512155	-9.42185	-9.21801	1220		Zheng et al., 2017
12ZN-05	87.28	29.39	Granite porphyry		11.51	0.714051	0.712008	0.71446	0.09	0.512155	-9.42185	-9.21801	1250		Zheng et al., 2017
12ZN-06	87.28	29.39	Granite porphyry	12.3	12.31	0.713106	0.710921	0.713543	0.09	0.512195	-8.64158	-8.4377	1160		Zheng et al., 2017
12ZN-09	87.28	29.39	Monzonitic granite porphyry		0.97	0.707428	0.707256	0.707463	0.1	0.512347	-5.67652	-5.49167	1060		Zheng et al., 2017

## Sheet: Table S3
Table S3. Zircon Hf isotope data of the subduction and collision-related magmatic rocks in the Gangdese belt, southern Tibet
sample no	longitude (°E)	latitude (°N)	rock type	age (Ma)	εHf(t=15)	εHfi	TDM1(Ma)	TDM2(Ma)	references
Jurassic
ST134a	89.62	29.52	Instrusive rock	189.6	14.59	10.634		297	Chu et al., 2011
T09-14-2	92.15	29.33	Granodiorite	190.4	3.9241	3.61304	548.9		Dong et al.，2013 (in Chinese)
T09-15-1	92.15	29.33	Granodiorite	180	3.51897	3.20439	560		Dong et al.，2013 (in Chinese)
T09-16-1	92.6	29.3	Monzogranite	195.3	9.06655	8.7491	331.3		Dong et al.，2013 (in Chinese)
T09-16-2	92.6	29.3	Granodiorite	196.5	9.33231	9.02292	321.4		Dong et al.，2013 (in Chinese)
T09-16-3	92.6	29.3	Granodiorite	202.1	8.43796	8.12113	354		Dong et al.，2013 (in Chinese)
XN-8	89.6308	29.4963	Diorite	170	11.2052	10.8903	246.368	340.105	Guo et al., 2013
XRX-1	88.759	29.3653	Diorite	182	10.5327	10.2167	272.6	385.45	Guo et al., 2013
XRX-3	88.6875	29.366	Granodiorite	178	9.48504	9.17616	321.333	493.476	Guo et al., 2013
XRX-4	88.6873	29.3657	Diorite	184	10.1244	9.81103	291.095	422.762	Guo et al., 2013
XRX-5	88.6365	29.3657	Diorite	180	9.75749	9.44224	304.75	459.85	Guo et al., 2013
7224-159	88.4	29.37	Ore-bearing porphyry	175.7	14.48			295	Hou et al.,2015
7226-233.7	88.45	29.4	Ore-bearing porphyry	181.8	14.29			311	Hou et al.,2015
7226-439	88.4333	29.3667	Ore-bearing porphyry	174.4	14.01			321	Hou et al.,2015
X6164-8	88.4333	29.3667	Ore-bearing porphyry	176	14.86			277	Hou et al.,2015
YB12-4-2	91.38	29.66	Volcanic rock	171.9	6.17	2.6		823.733	Hou et al.,2015
ZK5015-3	88.4	29.37	Ore-bearing porphyry	173	15.39			235	Hou et al.,2015
ZK6152-1	88.4	29.35	Ore-bearing porphyry	176	14.86			277	Hou et al.,2015
06FW164	89.7	29.5	Monzogranite	184.9	10.9216	10.6093	376		Ji et al., 2009
06FW165	89.6	29.46	Granodioritic gneiss	194	11.5462	11.2301	282		Ji et al., 2009
06FW166	89.65	29.45	Monzogranitic gneiss	205.3	10.7701	10.4595	340		Ji et al., 2009
06FW168	89.68	29.4	Diorite	174.2	10.6326	10.3381	431		Ji et al., 2009
14JC01	92.7285	29.4888	Rhyolite	171	3.02325	2.71543	589.175	1091.42	Liu et al., 2018
14JC02	92.7306	29.4808	Rhyolite	172	2.96872	2.66042	590.821	1094.65	Liu et al., 2018
14YB05	91.32	29.75	Dacite	184	5.13904	4.82589	494.942	877.952	Liu et al., 2018
14YB06	91.3	29.7294	Rhyolite	176	6.16445	5.8631	468.146	805.778	Liu et al., 2018
14YB08	91.3	29.73	Andesite	179	3.98679	3.68321	555.612	998.129	Liu et al., 2018
14YB09	91.25	29.7	Andesite	178	5.42554	5.11584	487.658	862.914	Liu et al., 2018
14YB10	91.2798	29.7294	Basalt	170	0.139136	-0.163338	718.963	1359.08	Liu et al., 2018
14YB12	91.22	29.71	Andesite	179	5.26167	4.95418	497.315	878.599	Liu et al., 2018
14YB13	91.2794	29.7164	Rhyolite	172	6.22907	5.9288	466.298	805.555	Liu et al., 2018
14YB15	91.2794	29.7162	Andesite	174	4.60698	4.30194	527.865	946.452	Liu et al., 2018
14YB26	91.6641	29.7265	Rhyolite	172	5.77485	5.4625	469.916	835.345	Liu et al., 2018
14YB27	91.6641	29.7265	Rhyolite	174	5.79315	5.48305	471.823	833.932	Liu et al., 2018
14YB29	91.4478	29.7514	Basalt	174	5.82801	5.51232	463.649	824.923	Liu et al., 2018
JC-12-12	92.6572	29.1544	Syenite	187.81	4.66432	4.34564	506.899		This study
JC-12-16	92.6617	29.1611	Granitic Porphyrite	200.16	5.48349	5.16661	476.26		This study
JC-12-17	92.6617	29.1611	Diorite	195.39	-0.82744	-1.14745	724.028		This study
WR-12-13	90.1917	29.3514	Diorite	185.23	11.7111	11.4015	228.472		This study
Q810-10	90.58	29.42	Andesite	189	8.45148	8.13199	353.8	452.95	Wang C et al ., 2018
Q810-19	90.58	29.42	Diorite	189	10.3024	9.9828	279.286	311.214	Wang C et al ., 2018
5001-X701	88.4	29.4	Diorite	167.3	10.2155	9.89454	281.831	349.481	Wang R et al., 2017
5057-282-300	88.4	29.4	Granodiorite	169.5	10.4449	10.1271	274.82	336.732	Wang R et al., 2017
RT06-01	88.39	29.41	Granodiorite	168	10.2034	9.88466	283.904	353.485	Wang R et al., 2017
RT06-16	88.76	29.36	Granodiorite	170.3	10.0223	9.70302	290.846	363.687	Wang R et al., 2017
RT06-21	88.59	29.37	Granodiorite	168.8	10.0456	9.72784	290.904	364.017	Wang R et al., 2017
RT06-S2	88.4	29.4	Granodiorite	172.2	10.487	10.1676	272.009	331.54	Wang R et al., 2017
RT06-S52	89.03	29.55	Granite	182.2	10.743	10.4294	265.501	312.671	Wang R et al., 2017
T09-16-1	92.5	29.13	Granodiorite	182.3	8.12659	7.80535	365.209	475.477	Wang R et al., 2017
T09-16-3	92.5	29.13	Granodiorite	187.6	7.62926	7.30981	386.821	505.794	Wang R et al., 2017
X6078-22	88.41	29.39	Granodiorite	173.7	10.0787	9.76328	291.785	359.643	Wang R et al., 2017
15TB-3	88.83	29.5	Gabbro	192	12.1921	11.8786	206.211	214.421	Wang R Q et al., 2017
TB1-6	88.83	29.36	Tonalite	178	9.6772	9.36034	306.579	382	Wang R Q et al., 2017
YB1323	91.28	29.73	Volcanic rock	177.6	6.45385	2.84002		809	Wei et al., 2014
YB1324	91.28	29.74	Volcanic rock	174.3	8.78889	5.16121		658	Wei et al., 2014
NMDZ06-01	89.2603	29.3892	Granite	191.6	10.8309	10.5197	263.333	304.067	Xie et al., 2018
PCL01-01	88.0483	29.3731	Granodiorite	172	10.348	10.0316	279.933	343.067	Xie et al., 2018
RKNM02-1	89.0394	29.3889	Granodiorite	181.214	10.8409	10.5234	258.929	304.857	Xie et al., 2018
T384	90.1	29.2	Meta-granite	178	12.6337	12.3231	189.462		Zhang et al., 2007 (in Chinese)
09FW72	91.71	29.24	Andesite	158	10.3123	10.0033	286.6	357.2	Zhang et al., 2014
09FW81	91.5	29.24	Hornblendite	157.4	11.9027	11.5959	221.5	257.2	Zhang et al., 2014
09FW90	91.5	29.24	Gabbro	155.9	11.2616	10.9511	247	297.167	Zhang et al., 2014
09FW94	91.5	29.24	Gabbro	157.5	11.4417	11.1375	243.125	288.562	Zhang et al., 2014
09FW95	91.5	29.24	Ganodiorite	155.5	11.205	10.901	252.875	304.812	Zhang et al., 2014
ZD01	91.78	29.23	Tonalite	158.5	11.4175	11.1161	245.889	291.778	Zhang et al., 2014
ML31-1	93.3213	29.6061	Monzogranite	191.9	2.70736	2.40305	606.973	825.69	Zhu et al., 2011
Cretaceous
08ND-8	91.8058	29.3014	Diorite	96	6.10722	5.79187	452.833	889.5	Chen et al., 2015
09nds-17	91.8078	29.3067	Diorite porphyrite	91.1	12.2447	11.9236	200.25	339.417	Chen et al., 2015
09NDZ-21	91.7967	29.3031	Felsophyre	93.7	11.3863	11.0744	255.702	452.821	Chen et al., 2015
06FW114	90.9931	29.5308	Granodiorite	86.4	9.96193	9.6387		552	Ji et al., 2009
06FW170	89.6283	29.3928	Diorite	108.6	11.1762	10.855		416	Ji et al., 2009
08FW50	91.184	29.635	Granodiorite	61.7	9.56022	9.23987	308.584	457.429	Ji et al., 2014
08FW54	91.985	29.729	Porphyry	65.8	8.1354	7.83705	388.101	551.268	Ji et al., 2014
08FW55	91.985	29.729	Granite	66.9	7.01409	6.70474	422.348	620.344	Ji et al., 2014
08FW56	92.2	29.709	Granodiorite	68.3	8.61925	8.30032	347.724	514.269	Ji et al., 2014
08FW66	92.04	29.716	Granite	67.4	6.01327	5.70319	462.989	684.148	Ji et al., 2014
09FW08	93.307	29.624	Gabbro	66	8.16623	7.84987	368.04	545.216	Ji et al., 2014
09FW09	93.307	29.624	Diorite	66.6	7.68921	7.37111	385.824	575.396	Ji et al., 2014
09FW10	93.307	29.624	Granodiorite	66.2	5.00931	4.70097	501.601	736.044	Ji et al., 2014
09FW11	93.307	29.624	Granite	64.7	4.53095	4.22004	521.121	755.98	Ji et al., 2014
09FW25	93.968	29.186	Diorite	87.2	11.0153	10.6932	248.874	347.448	Ji et al., 2014
09FW26	93.933	29.178	Diorite	87.0	11.3781	11.0575	235.39	324.825	Ji et al., 2014
09FW30	93.204	29.151	Monzogranite	76.7	7.03608	6.72772	420.802	597.535	Ji et al., 2014
09FW33	93.178	29.123	Monzogranite	79.7	5.24187	4.93127	492.138	699.244	Ji et al., 2014
09FW34	93.128	29.14	Diorite	94.9	9.59394	9.26954	304.065	434.094	Ji et al., 2014
ML03-1	93.87	29.118	Diorite	90.3	11.276	10.9538	238.639	329.113	Ji et al., 2014
ML04-1	93.837	29.126	Diorite	86.5	11.4557	11.1342	231.824	319.841	Ji et al., 2014
ML05-1	93.766	29.141	Monzogranite	78.4	10.0739	9.75999	292.657	415.845	Ji et al., 2014
ML07-1	93.518	29.168	Granodiorite	73.5	6.71373	6.40159	430.176	615.269	Ji et al., 2014
ML08-1	93.466	29.153	Monzogranite	74.4	1.21163	0.897663	651.258	945.132	Ji et al., 2014
ML09-1	93.381	29.06	Monzogranite	78	9.43742	9.12172	317.234	455.547	Ji et al., 2014
07TB33b-2	91.42	29.35	Monzogranite	93.3	11.0532	10.7406		253.857	Jiang et al., 2012
07TB18	91.8456	29.2567	Diorite	76.5	8.40394	8.08661	357.667	523.933	Jiang et al., 2014
09TB117-1	91.4083	29.3019	Diorite	91.1	10.9082	10.5998	262.6	357.133	Jiang et al., 2014
09TB124	91.4553	29.3025	Granite	91.8	11.0958	10.779	249.2	341.8	Jiang et al., 2014
09TB71	92.1697	29.2722	Gabbro	94.35	2.70389	2.38429	585	1210	Ma et al., 2013a
09TB79	92.1628	29.2789	Gabbro	94.4	6.90881	6.58738	414	821	Ma et al., 2013a
09BT160	91.5	29.67	Mafic rock	92.3	8.81544	8.51312	392		Ma et al., 2015
JC-12-5	92.5153	29.1411	Tonalite	83.21	8.44608	8.12366	351.348		This study
JC-12-6	92.5333	29.1828	Granite	80.68	7.89992	7.58325	378.709		This study
LX-12-3	93.1644	29.0658	Granite	92.44	9.40895	9.08513	311.837		This study
LX-12-5	93.1556	29.0792	Granite	91.42	8.94581	8.62285	331.026		This study
T321	90.4	29.26	Gabbroic diorite	90.8	10.4835	10.1643	272.083		Xu et al., 2015
T368	90.28	29.47	Granodiorite	88.7	10.8282	10.5032	254.364		Xu et al., 2015
T372	90.28	29.47	Diorite	88.4	10.238	9.91376	279.083		Xu et al., 2015
T433	89.1	29.42	Gabbro	94	10.6907	10.3705	264.167		Xu et al., 2015
12FW149	89.11	29.13	Rodingite	125.7	14.2422	13.9129			Zhang et al., 2016
12FW152	89.09	29.14	Gabbro	124.6	14.1292	13.7998			Zhang et al., 2016
12FW156	89.07	29.13	Plagiogranite	124.7	13.598	13.2687			Zhang et al., 2016
PC01	89.15	29.18	Rodingite	126	14.826	14.4967			Zhang et al., 2016
BB114-01	93.15	29.1	Granite	79.7	8.90514	8.58844	327	471.429	Zheng et al., 2014
BB-42-1	93.15	29	Lamprophyre	96.9	9.19945	9.31594	982.5	612.714	Zheng et al., 2014
BB-55-1	93.15	29.1	Granite	78.1	4.40306	4.08976	524.706	767.588	Zheng et al., 2014
MM02-3	91.9755	29.2535	Andesite	136.5	9.70694	9.38462	301.154	403.615	Zhu et al., 2009
ML01-1	93.3151	29.0061	Tonalite	84.2	10.8395	10.519	256.866	359.346	Zhu et al., 2011
ML06-1	93.3802	29.0572	Granodiorite	79.3	10.8942	10.5765	256.802	359.536	Zhu et al., 2011
ML11-1	93.4519	29.1132	Monzogranite	82.2	10.0923	9.78617	298.355	412.201	Zhu et al., 2011
NML01-1	89.0945	29.4408	Diorite	87.7	10.6722	10.3491	262.963	368.478	Zhu et al., 2011
RGZ01-1	90.4117	29.2653	Diorite	87.4	12.2368	11.9152	200.31	267.629	Zhu et al., 2011
Paleocene
ET021D	91.6	29.69	Monzogranite	64.6	11.0734	10.5527	257.7	371.9	Chu et al., 2011
ET021E	91.6	29.69	Gabbro	64	12.4636	12.1122	195.5	272.333	Chu et al., 2011
ST043A	88.2	29.45	Granodiorite	50.4	6.84959	6.52764	415.667	638.333	Chu et al., 2011
ST147A	90.2	29.4	Diorite	50.6	10.9362	10.6157	253.273	375.636	Chu et al., 2011
ST152A	90.7	29.33	Gabbro	52.7	11.6462	11.3289	226.7	326.75	Chu et al., 2011
T076	91.2	29.67	Granodiorite	59.3	12.055	11.781	210	297.067	Chu et al., 2011
T201B	90.7	29.35	Granodiorite	50.7	11.5888	11.2405	227.5	335.25	Chu et al., 2011
14GT004	94.5	29.5	hornblende gabbros	50.3	0.706965	0.395489	679.853	1030.12	Guo et al., 2019
T774	94.5	29.5	gneissic granite	50.4	-11.398	-11.7174	1145.67	1797.13	Guo et al., 2019
LS2	91.2	29.65	Granite	51.1	2.6299	2.31635	595.6	916.2	Huang et al., 2010 (in Chinese）
LS5	91.2	29.65	Diorite	61	8.60562	8.28936	350.45	534.05	Huang et al., 2010 (in Chinese）
13SS-01	86.28	29.63	Granodiorite	52.71	-2.0535	-2.37018	779.472	1202.49	Huang et al., 2019
13SS-02	86.28	29.63	Granodiorite	53.75	-1.9019	-2.21962	771.287	1192.04	Huang et al., 2019
13SS-03	86.28	29.63	Granodiorite	53.95	-2.10857	-2.42493	782.287	1205.32	Huang et al., 2019
06FW101	91.5	29.6867	Monzogranite	64.7	6.78361	6.47165	429.105	874	Ji et al., 2009
06FW104	91.1	29.65	Monzogranite	64.4	5.97455	5.66416	464.278	948.389	Ji et al., 2009
06FW105	90.9	29.6817	Monzogranite	55.2	5.09546	4.77416	486.15	1036.7	Ji et al., 2009
06FW110	90.8	29.7	Monzogranite	54.3	6.81581	6.49719	420.333	882.556	Ji et al., 2009
06FW111	91	29.4433	Monzogranite	50.6	10.3071	9.98945	280.263	569.211	Ji et al., 2009
06FW112	90.9	29.5	Granodiorite	53.4	9.83485	9.51483	297.737	608.211	Ji et al., 2009
06FW118	90.9	29.4	Monzogranite	51	9.76832	9.45285	303.75	619.05	Ji et al., 2009
06FW119	91	29.4992	Granodiorite	51.2	10.6788	10.3599	264.6	534.45	Ji et al., 2009
06FW120	90.9	29.44	Diorite	50.3	10.0406	9.72711	294.444	594.778	Ji et al., 2009
06FW121	90.9	29.45	Granite	51.1	10.5014	10.1933	279.429	554.714	Ji et al., 2009
06FW126	90.8	29.45	Granodiorite	55.3	5.42248	5.10659	480.05	1010.1	Ji et al., 2009
06FW129	90.9	29.4639	Granodiorite	52.9	5.21074	4.89515	488.947	1032.89	Ji et al., 2009
06FW146	90.7	29.5	Gabbro	56.9	12.0268	11.7055	209	403.75	Ji et al., 2009
06FW147	90.7	29.3675	Granodiorite	51.5	12.594	12.2714	185.588	358.529	Ji et al., 2009
06FW148	90.7	29.4	Syenogranite	51.3	10.9482	10.6295	254.071	506.214	Ji et al., 2009
06FW151	90.7	29.4	Diorite	55.5	11.8579	11.5362	215.474	420.579	Ji et al., 2009
06FW152-2	90.2	29.4014	Diorite	57.3	11.9266	11.603	211.95	412.05	Ji et al., 2009
06FW154	90.3	29.5781	Monzogranite	51.3	7.68335	7.3752	396.75	808.2	Ji et al., 2009
06FW155	90.3	29.5425	Monzogranite	61.1	6.8466	6.53353	425.05	873.45	Ji et al., 2009
06FW156	90.3	29.4994	Monzogranite	55.4	7.56271	7.24568	392.002	813.273	Ji et al., 2009
06FW162	89.6	29.5389	Granodiorite	50.9	10.3149	9.99766	280.235	572	Ji et al., 2009
06FW174	90.1	29.3511	Diorite	50.2	10.1277	9.80705	285.526	584.421	Ji et al., 2009
06FW175	90.1	29.3489	Diorite	52.6	10.4042	10.0862	276.316	558.737	Ji et al., 2009
06FW176	90.2	29.3347	Diorite	53.6	10.3201	10.0081	284.067	562.4	Ji et al., 2009
08FW51	91.164	29.637	Granodiorite	64.5	9.61924	9.30078			Ji et al., 2012
09FW41	92.738	29.419	Monzogranite	56.1	8.73445	8.41667			Ji et al., 2012
09FW42	92.745	29.407	Monzogranite	50.7	6.50977	6.18873			Ji et al., 2012
09FW50	92.697	29.239	Granodiorite	50.2	8.03171	7.70939			Ji et al., 2012
SR03-1	92.217	29.267	Granodiorite	59.8	6.96041	6.64847			Ji et al., 2012
08FW62	94.286	29.744	Granodiorite	66.4	-6.97716	-7.29622	970.334	1512.4	Ji et al., 2017
11JT15	94.5	29.725	Granite	57.9	2.95661	2.6322	566.648	899.868	Ji et al., 2017
LZ13-1	94.381	29.639	Granodiorite	67.1	-5.2233	-5.53823	908.522	1318.33	Ji et al., 2017
LZ15-5	94.348	29.632	Diorite	64	-2.66648	-2.98133	805.933	1213.8	Ji et al., 2017
LZ17-1	94.425	29.462	Monzogranite	51.7	-6.22103	-6.53126	955.863	1374.9	Ji et al., 2017
07TB28a	91.4	29.3553	Diorite	61.5	10.6736	10.3588	267.833	387.583	Jiang et al., 2014
07TB28b	91.8	29.2622	Granodiorite	62	6.38782	6.07506	445.357	663.643	Jiang et al., 2014
SZ0343A	90.7	29.3	Granodiorite	51.2	9.40407	9.08506	315.85	473.85	Mo et al., 2008
KMQ-12-2	92	29.3581	Granodiorite	50.79	9.25889	8.94935	329.625		Wang R et al., 2015a
RD-12-5	92	29.7083	Monzonite	66.3	7.75057	7.45005	398.167		Wang R et al., 2015a
WR-12-11	90.8	29.8	Granite porphyry	55.18	5.75921	5.44314	466		Wang R et al., 2015a
WR-12-30	86.3	29.5547	Granite porphyry	67.7	4.12339	3.80165	524.5		Wang R et al., 2015a
WR-12-33	86.3	29.5547	Granodiorite	50.73	-1.61832	-1.93619	760.083		Wang R et al., 2015a
WR-13-114	90.8	29.8006	Rhyolite	55.5	6.55717	6.24531	438.4		Wang R et al., 2015a
WR-13-2	90.7	29.35	Monzonite	51.5	11.3458	11.0266	237.7		Wang R et al., 2015a
T420-01	87.45	29.38	Granodiorite	63.89	4.99672	4.67691	493.083	757.417	Xu, 2010
T433-01	89.09	29.4	Gabbro	52.42	10.6907	10.3705	264.167	365.583	Xu, 2010
T446-01	89.06	29.63	Granodiorite	65.1	7.49172	7.17186	392.4	595.2	Xu, 2010
GZ-12-1	91.9	29.44	Granodiorite	51.42	9.92715	9.61135	297.302		Zhou et al., 2018
GZ-12-2	91.9	29.44	Diorite	50.76	9.79579	9.48051	303.011		Zhou et al., 2018
JC-12-1	92.3	29.02	Gabbroic diorite	51.28	7.31488	7.00313	407.773		Zhou et al., 2018
KMQ-12-1	92	29.35	Monzonite	52.69	8.69309	8.37272	343.313		Zhou et al., 2018
WR-12-8	90.7	29.72	Monzonite	52.19	6.22914	5.9063	439.171		Zhou et al., 2018
XB-12-9	92.3	29.53	Granite	50.76	5.13889	4.8363	509.46		Zhou et al., 2018
XG-12	91.7	29.34	Monzonite	67.45	10.4248	10.1289	292.406		Zhou et al., 2018
XG-12-1	91.7	29.35	Monzonite	64.7532	11.2931	11.0466	295.201		Zhou et al., 2018
XG-12-6	91.7	29.33	Granodiorite	66.64	11.9758	11.6572	212.386		Zhou et al., 2018
XG-12-7	91.6	29.3	Granodiorite	64.58	10.7643	10.4601	271.464		Zhou et al., 2018
NML03-1	89.1	29.6225	Diorite	62.4	5.91309	5.6034	468.288	687.734	Zhu et al., 2011b
Miocene
TG–6	90.4	29.5	Granite	15.02	3.83182	3.09821	551.87	877.13	Chen et al., 2014
ZK0206–14	90.4	29.5	Granite	15	4.04	3.71324	526.6	838.333	Chen et al., 2014
ZK0206–9	90.4	29.5	Granite	15.54	5.23333	4.90619	482.4	761.8	Chen et al., 2014
ET023	91.6	29.65	Adakite	15.36	9.29231	8.92265	308.385	487.846	Chung et al., 2009
T016	94.5	29.57	Adakite	26	1.26667	-5.19984		1192.48	Chung et al., 2009
T060b	90	29.45	Adakite	15.1	4.84545	4.01678	495.75	791.25	Chung et al., 2009
QL601-3001	91.6	29.59	Ore-bearing porphyry	16.8	7.795	7.40526		601.85	Hou et al., 2013
BP17	92	29.85	Ore-bearing porphyry	13.9	3.66849	3.37048	541.692	696.729	Hu et al，2015 (in Chinese)
BP18	92	29.8	Ore-bearing porphyry	14	1.90717	1.58802	613.19	788.143	Hu et al，2015 (in Chinese)
2009-37	91.6	29.57	Ore-bearing adakite	16.6	6.85611	6.9471	397.167	511.222	Hu et al., 2015
803-33	91.6	29.63	Ore-bearing adakite	16.9	8.22	8.30837	342.438	440.812	Hu et al., 2015
803-35	91.6	29.63	Ore-bearing adakite	17	6.77941	6.85441	400.353	515.588	Hu et al., 2015
805-25	91.6	29.6	Ore-bearing adakite	16.7	9.174	9.2607	304.4	391.333	Hu et al., 2015
QL105H	91.6	29.7	Barren adakite	17.4	7.27375	7.35133	381.188	490.188	Hu et al., 2015
QL37H	91.6	29.57	Barren adakite	17.3	7.67733	7.6646	368.067	472.533	Hu et al., 2015
ZK1407-12	90	29.6	biotite monzogranite porphyry	14.8	3.65594	3.79194	521.241	674.555	Hu et al., 2017
ZK1407-13	90	29.6	biotite monzogranite porphyry	14.8	3.38509	3.51791	533.826	688.709	Hu et al., 2017
804-169.8	87.5	29.7	Diorite porphyry	14	-2.57429	-2.92512	792.838	1264.02	Huang et al., 2015 (in Chinese）
806-216	87.5	29.66	Diorite porphyry	14	-3.7425	-4.05627	840.31	1337.18	Huang et al., 2015 (in Chinese）
806-292.7	87.5	29.7	Diorite porphyry	14	-2.50538	-2.81009	792.617	1257.86	Huang et al., 2015 (in Chinese）
06FW123	90.8	29.5217	Monzogranite	17	5.8585	5.3064	463.1	1027.4	Ji et al., 2009
06FW124	90.8	29.5217	Granitic porphyrite	15.3	6.56944	6.06103	437.778	961.5	Ji et al., 2009
06FW125	90.8	29.5172	Monzogranite	17.7	6.31688	5.79752	442.125	984.75	Ji et al., 2009
06FW142	90.7	29.4392	Monzogranite	21.3	8.75933	8.27286	347.067	761.2	Ji et al., 2009
06FW158	90	29.5208	Monzogranite	14.9	4.72059	4.4018	498.765	1124	Ji et al., 2009
06FW159	90	29.6069	Monzogranite	15.3	4.60765	4.27907	503.529	1134.65	Ji et al., 2009
06FW160	90	29.65	Granitic porphyrite	13.7	6.16	5.86824	444.062	992.125	Ji et al., 2009
06FW161	90	29.55	Dioritic porphyrite	13.5	6.5415	6.20818	427.5	958.5	Ji et al., 2009
BR-17	90	29.57	Monzogranite porphyry	14.2	4.95417	4.5944	492.333	1104.54	Li et al., 2011
BR-18	90	29.57	Monzogranite porphyry	14.8	4.0087	3.69018	527.13	1189.26	Li et al., 2011
QD-1	91.4	29.55	Monzogranite porphyry	17.1	8.84583	8.16618	352.458	760.125	Li et al., 2011
QDZK001-116	91.4	29.55	Granodiorite porphyry	19.1	9.53333	8.60823	333.875	704.667	Li et al., 2011
QDZK001-216	91.4	29.55	Granodiorite porphyry	19	8.89167	8.26932	346.458	753.917	Li et al., 2011
TG-39	90.4	29.4833	Monzogranite porphyry	16	3.28077	2.92843	556.731	1257.08	Li et al., 2011
PD7001YT-5	92	30.1	Monzonite granite	16.23	3.0466	3.04839	553.887	878.372	Luo et al.，2011 (in Chinese)
DJL16-2	87.3	29.54	Monzogranite	17.1	-2.44706	-3.03879	793.882		Sun et al., 2017
JR-5	88.9	29.6567	Monzonite porphyry	16	5.04772	4.71182	496.937	772.915	Wang R et al., 2015b
WR-13-100	91.6	29.6083	Monzonite porphyry	14	1.46054	1.16008	628.843	1000.17	Wang R et al., 2015b
XB-12-3	92.3	29.4047	Granite porphyry	23.4	4.49192	3.9955	521.329	814.067	Wang R et al., 2015b
T339	90.1	29.5833	Granitoid	14.6	4.81111	4.5109	494.778	786.778	Xu et al., 2010
T358	90.4	29.4833	Granitoid	14.2	4.16364	3.85791	522	829.091	Xu et al., 2010
T380	90	29.6	Granitoid	14.3	2.68182	2.39512	579.091	922.818	Xu et al., 2010
T399	88.3333	29.8333	Granitoid	14.3	0.0166667	0.0294702	679.917	1072.67	Xu et al., 2010
T403	88.4167	29.8333	Granitoid	14.4	-0.533333	-0.81927	710.917	1127.75	Xu et al., 2010
T605	90	29.6	Granitoid	14	3.44286	1.44029	608.091	976.091	Xu et al., 2010
BB-81	94.4	29.57	Granitoid	26.1	0.357143	-8.98755		1393	Zheng et al., 2012
BB-86	94.4	29.57	Granitoid	27.1	-0.818182	-9.92447		1460.68	Zheng et al., 2012

## Sheet: Table S4
Table S4. Sr-Nd isotope data used for the magma mixing modelling
sample no	longitude (°E)	latitude (°N)	rock type	age (Ma)	87Rb/86Sr	87Sr/86Sr	(87Sr/86Sr)i	(87Sr/86Sr)(t=15 Ma)	147Sm/144Nd	143Nd/144Nd	εNdi	εNd(t=15 Ma)	references
The ultrapotassic volcanic rock that represents the trachytic melt and used to magma mixing modeling
ZFC004	86.7	30.8	UPV	11.5	2.1798	0.722833	0.722476	0.72294	0.1192	0.511914	-14	-13.9622	Guo et al., 2015
The Paleocene sample that represents lower crustal magma and used to magma mixing modeling
ST152A	90.69	29.33	Gabbro	52.7	0.007	0.703856	0.7039	0.703852	0.1492	0.512855	4.23301	4.32407	Wen, 2007
The Jurassic samples with the maximum εNd(t=15 Ma) per 0.5 longitude
XX-30	88.4	29.3528	Dacite porphyry	195	0.0896	0.705605	0.705357	0.705376	0.12	0.512931	5.71553	5.86254	Qu et al，2007 (in Chinese)
TB-8	88.8	29.47	Gabbro	178	0.007	0.703632	0.7036	0.703601	0.17	0.512922	5.53997	5.59128	Wang R Q et al., 2017
Q810-18	90.6	29.4167	Andesite	189	0.018915	0.703676	0.703625	0.703629	0.150948	0.512935	5.79356	5.88134	Wang C et al., 2018
14YB13	91.3	29.7164	Rhyolite	172	0.633	0.706154	0.704606	0.704741	0.1631	0.51281	3.35519	3.41962	Liu et al., 2018
10SR-27	92	29.2	Basalt		0.024	0.704191	0.704126	0.704131	0.1768	0.512967	6.41778	6.45611	Kang et al., 2014
14JC02	92.7	29.4808	Rhyolite	172	1.3865	0.707884	0.704493	0.704788	0.1361	0.51266	0.429153	0.545145	Liu et al., 2018
The Cretaceous samples with the maximum εNd(t=15 Ma) per 0.5 longitude
PC06	89.2	29.18	Plagiogranite	129	0.1095	0.705304	0.704902	0.704925	0.2295	0.513123	9.46087	9.39845	Zhang et al., 2016
ST132A	89.6	29.5	Diorite	94	0.24	0.704744	0.7044	0.704451	0.1555	0.512886	4.83772	4.91675	Wen , 2007
T035B	90.3	29.29	Gabbro	102	0.033	0.704038	0.704	0.704007	0.1526	0.51286	4.33054	4.4151	Wen , 2007
09TB170	91.5	29.7	Mafic rock	92.3	0.1086	0.705026	0.704884	0.704907	0.1543	0.512854	4.2135	4.2948	Ma et al., 2015
MM02-3	92	29.2535	Andesite	136.5	0.5612	0.705221	0.70413	0.70425	0.1089	0.512859	4.31103	4.47923	Zhu et al., 2009
BB-112	93.2	29.1	Granodiorite	103.1	0.262	0.704633	0.704249	0.704305	0.274561	0.512785	2.86752	2.71862	Zheng et al., 2013
T213	93.3	29.04	Tonalite	80	0.19	0.704591	0.7044	0.70444	0.1165	0.512748	2.14576	2.29933	Wen , 2007
09TB45-1	94	29.1972	Granodiorite	94.7	0.2954	0.704592	0.704202	0.704265	0.1214	0.512794	3.04308	3.18731	Ma et al., 2013b
The Paleocene samples with the maximum εNd(t=15 Ma) per 0.5 longitude
13SS-01	86.28	29.63	Granodiorite	52.71	1.79	0.707826	0.706455	0.706836	0.11	0.512417	-4.31103	-4.14527	Huang et al., 2019											1
ST042B	88.25	29.5	Granodiorite	50.7	1.197	0.705637	0.7048	0.70503	0.1148	0.51269	1.01436	1.17114	Wen, 2007
ST147A	90.18	29.4	Diorite	50.6	0.221	0.704364	0.7042	0.704252	0.1299	0.512831	3.76484	3.89282	Wen, 2007
ST152A	90.69	29.33	Gabbro	52.7	0.007	0.703856	0.7039	0.703852	0.1492	0.512855	4.23301	4.32407	Wen, 2007
07TB32	91.4	29.3	Diorite		0.1935	0.704672	0.704502	0.704544	0.1107	0.512821	3.56977	3.73449	Jiang et al., 2014
ST102A	91.84	29.48	Monzogranite	60	1.496	0.705632	0.7044	0.704676	0.1331	0.512754	2.26281	2.38461	Wen, 2007
14GT004	94.5	29.5	hornblende gabbros	50.3	0.40043	0.70636	0.706074	0.706074	0.152029	0.512518	-2.34083	-2.25543	Guo et al., 2019
The Miocene samples with the maximum εNd(t=15 Ma) per 0.5 longitude
ZM-4	87.4667	29.6583	Adakitic porphyry		1.625	0.70749	0.70714	0.707486	0.1201	0.51243	-4.05744	-3.911	Gao et al., 2010
T403	88.29	29.78	Granite	14.4	1.716	0.70677	0.70642	0.706786	0.107	0.512363	-5.36441	-5.19294	Xu et al., 2010
Cj-02	90	29.6	Monzogranite porphyry	15.6	5.849	0.706424	0.705	0.705	0.09176	0.512679	0.799785	1.00065	Hou et al., 2004
Nmy-04	90.91	29.49	Monzogranite porphyry	16	0.561	0.705275	0.7051	0.7051	0.09606	0.51274	1.98971	2.18239	Hou et al., 2004
Dzl-07	91.4	29.5	Monzonite porphyry	13.4	2.031	0.705201	0.7047	0.7047	0.09498	0.512733	1.85316	2.0479	Hou et al., 2004
QL02-8	91.65	29.7	Granodiorite	16.8	0.23	0.705271	0.705216	0.705216	0.1089	0.512675	0.721757	0.889815	Hou et al., 2013
TBL07-06	93.075	29.9083	Granite porphyry	19.72	0.523042	0.706174	0.70603	0.706141	0.086376	0.512534	-2.02872	-1.81766	Wang et al, 2010 (in Chinese)
BB-82	94.5	29.57	Barren porphyry	26.2	0.211	0.706336	0.706257	0.706257	0.08	0.512467	-3.33569	-3.11	Hou et al., 2013

## Sheet: Table S5
Table S5. Lu-Hf isotope data of the inherited zircons in Miocene magmatic rocks in the Gangdese belt, southern Tibet
sample no	longitude (°E)	latitude (°N)	age (Ma)	176Yb/177Hf	176Lu/177Hf	176Hf/177Hf	εHf(t=15)	TDM1(Ma)	TDM2(Ma)	references
T016-28	94.5	29.57	2377.6		0.000601	0.2813	2.1		2747	Chung et al., 2009
BB-86-9	94.4	29.57	1795		0.00084	0.28176	3.2		2259	Zheng et al., 2012
BB-86-7	94.4	29.57	1769		0.00055	0.28166	-0.7		2482	Zheng et al., 2012
BB-86-2	94.4	29.57	1738		0.00102	0.28167	-1.4		2502	Zheng et al., 2012
BB-81-13	94.4	29.57	1690		0.00083	0.2817	-1.1		2446	Zheng et al., 2012
BB-81-12	94.4	29.57	1660		0.0012	0.28162	-5.2		2678	Zheng et al., 2012
BB-81-15	94.4	29.57	1561		0.0009	0.28192	3.8		2043	Zheng et al., 2012
BB-86-13	94.4	29.57	1527		0.00125	0.28208	8.3		1737	Zheng et al., 2012
T016-15	94.5	29.57	1198		0.000498	0.282076	2.4		1818	Chung et al., 2009
T016-12c	94.5	29.57	1159		0.000922	0.282083	1.5		1847	Chung et al., 2009
T016-09.C	94.5	29.57	1143		0.000421	0.282123	2.9		1747	Chung et al., 2009
BB-86-11	94.4	29.57	1130		0.0005	0.28205	-0.7		1996	Zheng et al., 2012
BB-81-16	94.4	29.57	853		0.00048	0.28225	0.3		1721	Zheng et al., 2012
T016-03	94.5	29.57	587.6		0.000286	0.282561	5.8		1142	Chung et al., 2009
T016-19.C	94.5	29.57	369.4		0.000646	0.282385	-5.5		1667	Chung et al., 2009
BB-86-20	94.4	29.57	354		0.00143	0.28236	-7.1		1806	Zheng et al., 2012
BB-86-5	94.4	29.57	332		0.00163	0.28235	-8.2		1856	Zheng et al., 2012
BB-86-16	94.4	29.57	245		0.00128	0.28233	-10.6		1946	Zheng et al., 2012
T016-14	94.5	29.57	240.1		0.000441	0.282742	4.3		968	Chung et al., 2009
QD-1 19	91.4	29.55	182	0.042966	0.001477	0.283061	10.5327	274	388	Li et al., 2011
ET023-12.C	91.6	29.65	132.8	0.04851	0.001837	0.282934	6.03985	446	622	Chung et al., 2009
QDZK001-116 1	91.4	29.55	80	0.020405	0.000989	0.283027	9.3351	319	621	Li et al., 2011
QDZK001-116 11	91.4	29.55	79	0.042184	0.001926	0.283058	10.4222	282	528	Li et al., 2011
QDZK001-116 3	91.4	29.55	78	0.022862	0.000894	0.283031	9.47749	313	612	Li et al., 2011
QDZK001-116 5	91.4	29.55	76	0.017201	0.000691	0.283041	9.83314	297	580	Li et al., 2011
QDZK001-116 10	91.4	29.55	70	0.017637	0.000782	0.283035	9.62006	306	608	Li et al., 2011
QDZK001-116 18	91.4	29.55	69	0.022225	0.001026	0.283027	9.33473	320	637	Li et al., 2011
QDZK001-116 8	91.4	29.55	69	0.019315	0.000782	0.283026	9.30177	319	638	Li et al., 2011
QDZK001-216 07	91.4	29.55	69	0.019991	0.000837	0.283015	8.91221	334	673	Li et al., 2011
QDZK001-116 2	91.4	29.55	68	0.018093	0.000704	0.283035	9.62082	305	610	Li et al., 2011
QD-1 02	91.4	29.55	66	0.026318	0.000909	0.283019	9.05296	329	664	Li et al., 2011
T016-01.2c	94.5	29.57	64.04		0.000394	0.282593	-4.9		1402	Chung et al., 2009
T016-01.1c	94.5	29.57	63.49		0.000458	0.28243	-10.7		1757	Chung et al., 2009
QD-1 22	91.4	29.55	63	0.044499	0.001593	0.283034	9.57671	313	621	Li et al., 2011
QDZK001-216 11	91.4	29.55	63	0.018558	0.000896	0.28304	9.79576	299	599	Li et al., 2011
QD-1 16	91.4	29.55	61	0.024797	0.000809	0.283072	10.9283	253	500	Li et al., 2011
QDZK001-116 13	91.4	29.55	61	0.014028	0.000658	0.28305	10.1518	284	570	Li et al., 2011
T016-19.M	94.5	29.57	59.47		0.00097	0.282634	-3.6		1317	Chung et al., 2009
QDZK001-216 10	91.4	29.55	59	0.028384	0.001164	0.283046	10.0053	293	588	Li et al., 2011
QDZK001-216 13	91.4	29.55	56	0.028577	0.001171	0.283067	10.7479	263	524	Li et al., 2011
06FW125 16	90.8	29.5172	54	0.022975	0.000777	0.282904	4.98725	491	1051	Ji et al., 2009
BR-17 06	90	29.57	54	0.04084	0.001139	0.282864	3.56907	552	1179	Li et al., 2011
QDZK001-116 7	91.4	29.55	54	0.014702	0.000574	0.283025	9.26845	319	661	Li et al., 2011
QDZK001-216 08	91.4	29.55	54	0.020302	0.000783	0.283039	9.76151	300	616	Li et al., 2011
T016-04	94.5	29.57	52.3		0.001182	0.282846	3.8		859	Chung et al., 2009
DJL16-2@15	87.3	29.54	51.5	0.031444	0.00094	0.282838	2.65153	586		Sun et al., 2017
T380-11	90	29.6	51	0.018943	0.00065	0.282847	2.97267	570	906	Xu et al., 2010
T399-12	88.3333	29.8333	51	0.05819	0.001543	0.282786	0.8066	670	1043	Xu et al., 2010
804-169.8-4.1	87.5	29.66	48.3	0.112614	0.001921	0.282864	3.56138	564	852	Huang et al., 2015 (in Chinese）
06FW123 02	90.8	29.5217	48	0.044072	0.001441	0.282905	5.01608	498	1057	Ji et al., 2009
06FW123 11	90.8	29.5217	48	0.027746	0.000939	0.282907	5.09175	488	1047	Ji et al., 2009
06FW123 08	90.8	29.5217	47	0.020473	0.000701	0.282918	5.48311	469	1012	Ji et al., 2009
T016-02c	94.5	29.57	46.64		0.000277	0.28288	4.9		786	Chung et al., 2009
06FW123 18	90.8	29.5217	46	0.029837	0.000964	0.282909	5.16223	486	1044	Ji et al., 2009
06FW124 05	90.8	29.5217	46	0.018337	0.000584	0.283055	10.3293	275	571	Ji et al., 2009
06FW124 09	90.8	29.5217	46	0.024206	0.000733	0.282826	2.22918	599	1310	Ji et al., 2009
06FW124 20	90.8	29.5217	46	0.0462	0.001438	0.282885	4.3088	527	1124	Ji et al., 2009
06FW124 02	90.8	29.5217	45	0.028267	0.00094	0.282838	2.65153	586	1274	Ji et al., 2009
06FW124 13	90.8	29.5217	44	0.010143	0.000379	0.283031	9.48256	308	653	Ji et al., 2009
QDZK001-116 6	91.4	29.55	44	0.015329	0.000647	0.283027	9.33846	315	664	Li et al., 2011
06FW125 10	90.8	29.5172	43	0.027631	0.000976	0.282943	6.36454	437	938	Ji et al., 2009
06FW142 10	90.7	29.4392	41.6	0.012045	0.000417	0.282863	3.54081	543	1196	Ji et al., 2009
T060b-07	90	29.45	41.16	0.02106	0.000742	0.282744	-0.668719	692	1088	Chung et al., 2009
06FW125 07	90.8	29.5172	40	0.020517	0.000732	0.282942	6.33157	436	945	Ji et al., 2009
06FW125 15	90.8	29.5172	40	0.014062	0.000454	0.282903	4.95506	487	1069	Ji et al., 2009
BB-86-8	94.4	29.57	40		0.00062	0.28229	-16.1		2137	Zheng et al., 2012
QDZK001-216 03	91.4	29.55	38	0.014699	0.000686	0.282988	7.95883	371	799	Li et al., 2011
QD-1 09	91.4	29.55	36	0.021254	0.000724	0.283054	10.2926	279	590	Li et al., 2011
QD-1 11	91.4	29.55	35	0.034224	0.00117	0.283033	9.54551	312	659	Li et al., 2011
QDZK001-216 04	91.4	29.55	33	0.024996	0.00118	0.283053	10.2527	283	597	Li et al., 2011

## Sheet: References
References
Chen, L., Qin K.Z., Li G.M., Li, J.X., Xiao, B., Zhao, J.X., Xin, Fan., 2015, Zircon U–Pb ages, geochemistry, and Sr–Nd–Pb–Hf isotopes of the Nuri intrusive rocks in the Gangdese area, southern Tibet: Constraints on timing, petrogenesis, and tectonic transformation: Lithos, v. 212, p. 379-396.
Chen, R., Liu, Y.L., Guo, L.S., Wang, Z.H., Liu, H.F., Xu, K.F., Zhang, J.S., 2014, Geochronology and Geochemistry of the Tinggong Porphyry Copper Ore Deposit, Tibet: Acta Geologica Sinica-english Edition, v. 88, p. 780-800.
Chu, M. F., Chung, S.L., Oreilly, S.Y., Pearson, N J., Wu, F.Y., Li, X.H., Liu, D.Y., Ji, J.Q., Chu, C.H., Lee, H.Y., 2011, India's hidden inputs to Tibetan orogeny revealed by Hf isotopes of Transhimalayan zircons and host rocks: Earth and Planetary Science Letters, v. 307, p. 479-486.
Chu, M.F., Chung, S.L. , O'Reilly, S.Y., Pearson, N.J., Lee, H.Y., 2011, India's hidden inputs to tibetan orogeny revealed by hf isotopes of transhimalayan zircons and host rocks: Earth and Planetary Science Letters, v. 307, p. 479-486.
Chung, S.L., Chu, M.F., Ji, J.Q., O’Reilly, S.Y., Pearson, N.J., Liu, D.Y., Lee, T.Y., Lo, C.H., 2009, The nature and timing of crustal thickening in Southern Tibet: Geochemical and zircon Hf isotopic constraints from post-collisional adakites: Tectonophysics, v. 477, p. 36–48.
Dong, X., Zhang, Z.M., 2013, Genesis and tectonic significance of the Early Jurassic magmatic rocks from the southern Lhasa terrane (in Chinese): Acta Petrologica Sinica, v. 29, p. 1933-1948.
Gao, Y.F., Hou, Z.Q., Kamber, B.S., Wei, R.H., Meng, X.G., Zhao, R.S., 2007, Adakite-like porphyries from the southern Tibetan continental collision zones: evidence for slab melt metasomatism: Contributions to Mineralogy and Petrology, v. 153, p. 105-120.
Gao, Y.F., Yang, Z.S., Santosh, M., Hou, Z.Q., Wei, R.H., Tian, S.H., 2010, Adakitic rocks from slab melt-modified mantle sources in the continental collision zone of southern Tibet: Lithos, v. 119, p. 651-663.
Guo, L.S., Liu, Y.L., Liu, S., Cawood, P.A., Wang, Z.H., Liu, H.F., 2013, Petrogenesis of early to middle jurassic granitoid rocks from the gangdese belt, southern tibet: implications for early history of the neo-tethys: Lithos, v. 179, p. 320-333.
Guo, L., Z, H.F., Harris, N., Luo, B.J., Zhang, W., Xu, W.C., 2019, Tectonic erosion and crustal relamination during the India-Asian continental collision: Insights from Eocene magmatism in the southeastern Gangdese belt: Lithos, v. 346-347, doi:10.1016/j.lithos.2019.105161
Guo, Z.F., Wilson, M., Zhang, M.L., Cheng, Z.H., Zhang, L.H., 2015, Post-collisional ultrapotassic mafic magmatism in south tibet: products of partial melting of pyroxenite in the mantle wedge induced by roll-back and delamination of the subducted indian continental lithosphere slab: Journal of Petrology, v. 56, p. 1365-1405.
Hou, Z.Q., Gao, Y.F., Qu, X.M., Rui, Z.Y., Mo, X.X., 2004, Origin of adakitic intrusives generated during mid-Miocene east–west extension in southern Tibet: Earth and Planetary Science Letters, v. 220, p. 139-155.
Hou, Z.Q., Yang, Z.M., Lu, Y.J., Kemp, A., Zheng, Y.C., Li, Q.Y., Tang, J.X., Yang, Z.S., Duan, L.F., 2015, A genetic linkage between subduction- and collision-related porphyry Cu deposits in continental collision zones: Geology, v. 43, p. 247-250.
Hou, Z.Q., Zheng, Y.C., Yang, Z.M., Rui, Z.Y., Zhao, Z.D, Jiang, S.H., Qu, X.M., Sun, Q.Z., 2013, Contribution of mantle components within juvenile lower-crust to collisional zone porphyry Cu systems in Tibet: Mineralium Deposita, v. 48, p. 173-192.
Hu, Y.B., Liu, J.Q., Hu J.R., Ding, X., Sun, W.D., Liu, Y., Ling, M.X., 2015, Geochemical studies on ore-bearing rocks in Bangpu porphyry Mo ( Cu)deposit,Tibet :Implications on the magma source and metallogenic mechanism (in Chinese): Acta Petrologica Sinica ,v. 31, p. 2038-2052.
Hu, Y.B., Liu, J.Q., Ling, M.X., Liu, Y., Ding, X., Liu, D.Y., Sun, W.D., 2017, Constraints on the origin of adakites and porphyry Cu-Mo mineralization in Chongjiang, Southern Gangdese, the Tibetan Plateau. Lithos, v. 292, p. 424-436.
Huang, F., Li, M.J., Xu, J.F., Zeng, Y.C., Chen, J.L., Wang, B.D., Yu, H.X., Chen, L., Zhao, P.P., Zhang, Z., 2019, Geodynamic transition from subduction to extension: evidence from the geochronology and geochemistry of granitoids in the Sangsang area, southern Lhasa Terrane, Tibet: International Journal of Earth Sciences, v. 108, p. 1663-1681.
Huang, Y., Ding, J., Li, G.M., Dai, J., Yan, G.Q., Wang, G., Liu, X.F., 2015, U-Pb Dating, Hf Isotopic Characteristics of Zircons from Intrusions in the Zhuluo Porphyry Cu-Mo-Au Deposit and Its Mineralization Significance (in Chinese): Acta Geologica sinica, v. 89, p. 99-108.
Huang, Y., Li. G.M., Ding, J., Dai, J., Yan, G.Q., Dong, S.L., Huang, H.X., 2017, Origin of the Newly Discovered Zhunuo Porphyry Cu‐Mo‐Au Deposit in the Western Part of the Gangdese Porphyry Copper Belt in the Southern Tibetan Plateau, SW China: Acta Geologica Sinica-english Edition, v. 91, p. 109-134.
Huang, Y., Zhao, Z.D., Zhang, F.Q., Zhu, D.C., Dong, G.C., Zhou, S., Mo, X.X., 2010, Geochemistry and implication of the Gangdese batholiths fom Renbu and Lhasa areas in southern Gangdese, Tibet (in Chinese): Acta Petrologica Sinica, v. 26, p. 3131-3142.
Ji, W.Q., Wu, F.Y., Chung, S.L., Li, J.X., Liu, C.Z., 2009, Zircon U-Pb geochronology and Hf isotopic constraints on petrogenesis of the Gangdese batholith, southern Tibet: Chemical Geology, v. 262, p. 229-245.
Ji, W.Q., Wu, F.Y., Chung, S.L., Liu, C.Z., 2014, The Gangdese magmatic constraints on a latest Cretaceous lithospheric delamination of the Lhasa terrane, southern Tibet: Lithos, v. 210, p. 168-180.
Ji, W.Q., Wu, F.Y., Liu, C.Z., Chung, S.L., 2012, Early Eocene crustal thickening in southern Tibet: New age and geochemical constraints from the Gangdese batholith: Journal of Asian Earth Sciences, v. 53, p. 82–95.
Ji, W.Q., Wu, F.Y., Liu, C.Z., Zhang, H., 2017, Zircon U-Pb geochronology and Hf isotopes of granitic rocks and river sands in the nyingchi region, Tibet: constraints on evolution of the deep crust beneath the southeast lhasa terrane: Journal of Asian Earth Sciences, v. 145, p. 613-625.
Jiang, Z.Q., Wang, Q., Li, Z.X., Wyman, D.A., Tang, G.J., Jia, X.H., Yang, Y.H., 2012, Late Cretaceous (ca. 90 Ma) adakitic intrusive rocks in the Kelu area, Gangdese Belt (southern Tibet): Slab melting and implications for Cu–Au mineralization: Journal of Asian Earth Sciences, v. 53, p. 67-81.
Jiang, Z.Q., Wang, Q., Wyman, D.A., Li, Z., Yang, J., Shi, X.B., Ma, L., Tang, G.J., Gou, G.L., Jia, X.H., Guo, H.F., 2014, Transition from oceanic to continental lithosphere subduction in southern Tibet: Evidence from the Late Cretaceous–Early Oligocene (~91–30 Ma) intrusive rocks in the Chanang-Zedong area, southern Gangdese: Lithos, v. 196-197, p. 213-231.
Kang, Z.Q., Xu, J.F., Wilde, S. A., Feng, Z.H., Chen, J.L., Wang, B.D., Fu, W.C., Pan, H.B., 2014, Geochronology and geochemistry of the Sangri Group Volcanic Rocks, Southern Lhasa Terrane: Implications for the early subduction history of the Neo-Tethys and Gangdese Magmatic Arc: Lithos, v. 200, p. 157-168.
Lang, X.H., Wang, X.H., Tang, J.X., Deng, Y.L., Cui, Z.W., Yin, Q., Xie, F.W., 2018, Composition and age of Jurassic diabase dikes in the Xiongcun porphyry copper–gold district, southern margin of the Lhasa terrane, Tibet, China: Petrogenesis and tectonic setting: Geological Journal, v. 53, p. 1973-1993.
Li, J.X., Qin, K.Z., Li, G.M., Xiao, B., Chen, L., Zhao, J.X., 2011, Post-collisional ore-bearing adakitic porphyries from Gangdese porphyry copper belt, southern Tibet: Melting of thickened juvenile arc lower crust: Lithos, v. 126, p. 265-277.
Liu, Z.C., Ding, L., Zhang, L.Y., Wang, C., Qiu, Z.L., Wang, J.G., Shen, X.L., Deng, X.Q., 2018, Sequence and petrogenesis of the Jurassic volcanic rocks (Yeba Formation) in the Gangdese arc, southern Tibet: Implications for the Neo-Tethyan subduction: Lithos, DOI: https://doi.org/10.1016/j.lithos.2018.04.026.
Luo, M.C., Wang, L.Q., Leng, Q.F., Chen, W., 2011, Zircon Hf isotope and Cet/Ce ratio of the monzogranite porphyry and biotite monzonitic granite in Bangpu Mo( Cu) deposit, Tibet (in Chinese): MINERAL DEPOSITS, v. 30, p. 266-277.
Ma, L., Wang, Q., Wyman, D.A., Jiang, Z.Q., Wu, F.Y., Li, X.H., Yang, J.H., Gou, G.N., Guo, H.F., 2015, Late Cretaceous back-arc extension and arc system evolution in the Gangdese area, southern Tibet: Geochronological, petrological, and Sr-Nd-Hf-O isotopic evidence from Dagze diabases: Journal of Geophysical Research, v. 120, p. 6159-6181.
Ma, L., Wang, Q., Wyman, D.A., Jiang, Z.Q., Yang, J.H., Li,Q.L., Guo, G.N., Guo, H.F., 2013a, Late Cretaceous crustal growth in the Gangdese area, southern Tibet: Petrological and Sr–Nd–Hf–O isotopic evidence from Zhengga diorite–gabbro: Chemical Geology, P. 54-70, DOI: http://dx.doi.org/10.1016/j.chemgeo.2013.04.005.
Ma, L., Wang, Q., Wyman, D.A., Li, Z.X., Jiang, Z.Q., Yang, J.H., Gou, G.N., Guo, H.F., 2013b, Late Cretaceous (100–89 Ma) magnesian charnockites with adakitic affinities in the Milin area, eastern Gangdese: Partial melting of subducted oceanic crust and implications for crustal growth in southern Tibet: Lithos, v. 175-176, P. 315-332.
Mo, X.X., Dong, G.C., Zhao, Z.D., Zhu, D.C., Zhou, S., Niu, Y.L., 2008, Mantle input to the crust in Southern Gangdese, Tibet, during the Cenozoic: Zircon Hf isotopic evidence: Journal of Earth Science, v. 20, p. 241-249.
Qu, X.M., Xin, H.B., Xu, W.Y., 2007, Petrogenesis of the Ore- Hosting Volcanic Rocks and Their Contribution to Mineralization in Xiongcun Superlarge Cu- Au Deposit , Tibet (in Chinese): ACTA GEOLOGICA SINICA, v. 81, p. 964-971.
Sun, X., Zheng, Y.Y., Li, M., Ouyang, H., Liu, Q.Q., Jing, X.K., Sun, G.P., Song, Q.J., 2017, Genesis of Luobuzhen Pb–Zn veins: Implications for porphyry Cu systems and exploration targeting at Luobuzhen-Dongshibu in western Gangdese belt, southern Tibet: Ore Geology Reviews, v. 82, p. 252-267.
Tang, Y.W., Chen, L., Zhao, Z.F., Zheng, Y,F., 2019, Geochemical evidence for the production of granitoids through reworking of the juvenile mafic arc crust in the Gangdese orogen, southern Tibet: Geological Society of America Bulletin, DOI: https://doi.org/10.1130/B35304.1.
Wang, B.D, Xu, J.F., Chen, J.L., Zhang, X.G., Wang, L.Q., Xia, B.B., 2010, Petrogenesis and geochronology of the ore-bearing porphyritic rocks in Tangbula porphyry molybdenum-copper deposit in the eastern segment of the Gangdese metallogenic belt (in Chinese): Acta Petrologica Sinica, v. 26, p. 1820–1832.
Wang, C., Ding, L., Zhang, L.Y., Ding, X.L., Yue, Y.H., 2018, Early Jurassic high‐Mg andesites in the Quxu area, southern Lhasa terrane: Implications for magma evolution related to a slab rollback of the Neo‐Tethyan Ocean: Geological Journal, v. 54, p. 2508-2524.
Wang, R., Richards, J. P., Hou, Z.Q., An, F., Creaser, R. A., 2015a, Zircon U–Pb age and Sr–Nd–Hf–O isotope geochemistry of the Paleocene–Eocene igneous rocks in western Gangdese: Evidence for the timing of Neo-Tethyan slab breakoff. Lithos, v. 224-225, 179-194.
Wang, R., Richards, J. P., Zhou, L.M., Hou, Z.Q., Stern, R. A., Creaser, R. A., Zhu, J.J., 2015b, The role of Indian and Tibetan lithosphere in spatial distribution of Cenozoic magmatism and porphyry Cu–Mo deposits in the Gangdese belt, southern Tibet: Earth-Science Reviews, v. 150, p. 68-94.
Wang, R., Richards, J.P., Hou, Z.Q., and Yang, Z.M., 2014, Extent of underthrusting of the Indian plate beneath Tibet controlled the distribution of Miocene porphyry Cu-Mo ± Au deposits: Mineralium Deposita, v. 49, p. 165–173.
Wang, R., Tafti, R., Hou, Z.Q., Shen, Z.C., Guo, N., Evans, N.J., Jeon, H., Li, Q.Y., Li, W.K., 2017, Across-arc geochemical variation in the jurassic magmatic zone, southern tibet: implication for continental arc-related porphyry cuau mineralization: Chemical Geology, v. 451, p. 116-134.
Wang, R.Q., Qiu, J.S., Yu, S.B., Zhao, J.L., 2017, Crust-mantle interaction during early Jurassic subduction of Neo-tethyan oceanic slab: evidence from the Dongga gabbro-granite complex in the southern Lhasa subterrane, Tibet: Lithos, v. 292, p. 262-277.
Wei, Y.Q., 2014, The geochronology, geochemistry and petrogenesis of the volcanic rocks of Yeba Formation, southern Tibet (doctoral dissertation): Beijing, China University of Geosciences, p. 66.
Wei, Y.Q., Zhao, Z.D., Niu, Y.L., Zhu, D.C., Liu, D., Wang, Q., Hou, Z.Q., Mo, X.X., Wei, J.C., 2017, Geochronology and geochemistry of the early jurassic yeba formation volcanic rocks in southern tibet: initiation of back-arc rifting and crustal accretion in the southern lhasa terrane: Lithos, v. 278-281, p. 477-490.
Wen, D.R., 2007, The Gangdese Batholith, Southern Tibet: Ages, Geochemical Characteristics and Petrogenesis (doctoral dissertation): Department of Geosciences College of Science, National Taiwan University, P. 41-44.
Xia, B.B., Xia, B., Wang, B.D., Li, J.F., Zhang, X.G., Wang, Y.C., 2010, Formation time of the Tangbula porphyry Mo-Cu deposit: evidence from SHRMP zircon U-Pb dating of Tangbula ore-bearing porphyries (in Chinese): Geotectonica et Metallogenia, v. 34, p. 291-297.
Xie, F.W., Tang, J.X., Lang, X.H., Ma, D., 2018, The different sources and petrogenesis of jurassic intrusive rocks in the southern lhasa subterrane, tibet: evidence from the trace element compositions of zircon, apatite, and titanite: Lithos, DOI: https://doi.org/10.1016/j.lithos.2018.06.024.
Xiong, Q.W., Chen, J.L., Xu, F., Huang, F., Chen, X.., Zeng, Y.C, Lei, M., 2015, LA-ICP-MS zircon U-Pb geochronology, geochemical characteristics and genetic study of Yeba Formation lavas in Demingding area, southern Tibet (in Chinese): Geological Bulletin of China: v. 34, p.1645-1655.
Xu, W.C., Zhang, H.F., Guo, L., Yuan, H.L., 2010, Miocene high Sr/Y magmatism, south Tibet: Product of partial melting of subducted Indian continental crust and its tectonic implication: Lithos, v. 114, p. 293-306.
Xu, W.C., Zhang, H.F., Luo, B.J., Guo, L., Yang, H., 2015, Adakite-like geochemical signature produced by amphibole-dominated fractionation of arc magmas: An example from the Late Cretaceous magmatism in Gangdese belt, south Tibet: Lithos,v. 232, p. 197-210.
Yang, Z.M., Hou, Z.Q., White, N.C., Chang, Z.S., Li, Z.Q., Song, Y.C., 2009, Geology of the post-collisional porphyry copper-molybdenum deposit at Qulong, Tibet: Ore Geology Reviews, v. 36, p. 133-159.
Zeng, Y.C., Chen, J.L., Xu, J.F., Lei, M., Xiong, Q.W., 2017, Origin of Miocene Cu-bearing porphyries in the Zhunuo region of the southern Lhasa subterrane: Constraints from geochronology and geochemistry: Gondwana Research, v. 41, p. 51-64.
Zhang, H.F., Xu, W.C., Guo, J.Q., Zong, K.Q., Cai, H.M., Yuan, H.L., 2007, Zircon U-Pb and Hf isotopic composition of deformed granite in the southern margin of the Gangdese belt, Tibet: Evidence for early Jurassic subduction of Neo-Tethyan oceanic slab (in Chinese): Acta Petrologica Sinica, v. 23, p. 1347-1353.
Zhang, L.L., Liu, C.Z., Wu, F.Y., Ji, W.Q., Wang, J.G., 2014, Zedong terrane revisited: An intra-oceanic arc within Neo-Tethys or a part of the Asian active continental margin?: Journal of Asian Earth Sciences, v. 80, p. 34-55.
Zhang, L.L., Liu, C.Z., Wu, F.Y., Zhang, C., Ji, W.Q., Wang, J.G., 2016, Sr–Nd–Hf isotopes of the intrusive rocks in the Cretaceous Xigaze ophiolite, southern Tibet: Constraints on its formation setting: Lithos, v. 258-259, p. 133-148.
Zhang, Z.M., Zhao, G.C., Santosh, M., Wang, J.L., Dong, X., Shen, K., 2010, Late Cretaceous charnockite with adakitic affinities from the Gangdese batholith, southeastern Tibet: Evidence for Neo-Tethyan mid-ocean ridge subduction?: Gondwana Research, v. 17, p. 615-631.
Zhao, J.X., Qin, K.Z., Li, G.M., Li,J.X., Xiao, B., Chen, L., 2012, Geochemistry and petrogenesis of granitoids at sharang eocene porphyry mo deposit in the main-stage of india-asia continental collision, northern gangdese, tibet: Resource Geology, v. 62, p. 84-98.
Zheng, Y.C., Hou, Z.Q., Gong, Y.L., Liang, W., Sun, Q.Z., Zhang, S., Fu, Q., Huang, K.X., Li, Q.Y., Li, W., 2014, Petrogenesis of Cretaceous adakite-like intrusions of the Gangdese Plutonic Belt, southern Tibet: Implications for mid-ocean ridge subduction and crustal growth: Lithos, v. 190-191, p. 240-263.
Zheng, Y.C., Hou, Z.Q., Li, Q.Y., Liang, W., Fu, Q., Li, W., Huang, K.X., 2012, Origin of Late Oligocene adakitic intrusives in the southeastern Lhasa terrane: evidence from in situ zircon U–Pb dating, Hf–O isotopes, and whole-rock geochemistry: Lithos, v.148, p. 296-311.
Zhou, L.M., Wang, R., Hou, Z.Q., Li, C., Zhao, H., Li, X.W., Qu, W.J., 2018, Hot Paleocene-Eocene Gangdese arc: Growth of continental crust in southern Tibet: Gondwana Research, v. 62, p. 178-197.
Zhu, D.C., Pan, G.T., Chung, S.L., Liao, Z.L., Wang, L.Q., Li, G.M., 2008, SHRIMP Zircon Age and Geochemical Constraints on the Origin of Lower Jurassic Volcanic Rocks from the Yeba Formation, Southern Gangdese, South Tibet: International Geology Review, v. 50, p. 442-471.
Zhu, D.C., Zhao, Z.D., Niu, Y.L., Mo, X.X., Chung, S.L., Hou, Z.Q., Wang, L.Q., Wu, F.Y., 2011, The Lhasa Terrane: Record of a microcontinent and its histories of drift and growth: Earth and Planetary Science Letters, v. 301, p. 241-255.
Zhu, D.C., Zhao, Z.D., Pan, G.T., Lee, H.Y., Kang, Z.Q., Liao, Z.L., Wang, L, Q., Li, G.M., Dong, G,C., Liu, B., 2009, Early cretaceous subduction-related adakite-like rocks of the Gangdese Belt, southern Tibet: Products of slab melting and subsequent melt-peridotite interaction?: Journal of Asian Earth Sciences, v. 34, p. 298-309.
